# Supplementary material for: Quantitative analyses of the hepatic proteome of methylmercury-exposed Atlantic cod (Gadus morhua) suggest oxidative stress-mediated effects on cellular energy metabolism
Source: BMC Genomics. 2016 Aug 5;17:554. doi: 10.1186/s12864-016-2864-2 (PMC4974784; doi:10.1186/s12864-016-2864-2)
Supplement: Additional file 2: Table S1. — 125 proteins differentially regulated by MeHg. (XLSX 94 kb) [file 12864_2016_2864_MOESM2_ESM.xlsx]

## Sheet: TableS1
Table S1. List of proteins differentally alted by MeHg
			Human ortholog					Ratios of MeHg / control		p-value (ANOVA & Dunnets test)
Ensembl id_Gadus morhua	Peptides quantified	Confidence score	gi	UniProt Accession	Gene Symbol	Gene Synonyms	UniProt Protein Name	Log2R_0.5mg	Log2R_2mg	Control vs 0.5 mg/kg BW MeHg	Control vs 2 mg/kg BW MeHg
ENSGMOP00000011675;ENSGMOP00000018213	1	100	461854	P35222	CTNNB1	CTNNB; MRD19; armadillo	Catenin beta-1	0.335856	1.94963	0.67	0.029
ENSGMOP00000013275	1	100	1351188	P48775	TDO2	TO; TPH2; TRPO; TDO	Tryptophan 2,3-dioxygenase	1.0102	1.82409	0.3928	0.0087
ENSGMOP00000008233	1	195.102	2492998	P55809	OXCT1	SCOT; OXCT	Succinyl-CoA	0.629499	1.54589	0.6074	0.0089
ENSGMOP00000003131	1	299.88	317373428	Q86U10	ASPG	C14orf76; GPA/WT	60 kDa lysophospholipase	0.104233	1.27249	0.9832	0.0448
ENSGMOP00000017349;ENSGMOP00000017372	2	1171.24	23503075	P08779	KRT16	K16; KRT16A; CK16; K1CP; FNEPPK; PC1; NEPPK	Keratin, type I cytoskeletal 16	0.315682	1.19644	0.6087	0.0304
ENSGMOP00000008404	1	399.509	47117288	Q99JI6	Rap1b	2810443E11Rik	Ras-related protein Rap-1b	0.291095	1.10113	0.8374	0.0048
ENSGMOP00000004296	2	199.677	292630842	P0CE71	OCM2	OCM	Putative oncomodulin-2109 aa protein	0.634449	1.09974	0.1327	0.007
ENSGMOP00000013859	1	100	317373496	Q93008	USP9X	FAF; MRX99; FAM; DFFRX	Probable ubiquitin carboxyl-terminal hydrolase FAF-X	0.475013	1.05612	0.2615	0.0005
ENSGMOP00000008781	1	100	317373383	Q8TDW0	LRRC8C	AD158; FAD158	Volume-regulated anion channel subunit LRRC8C	0.340995	0.975668	0.9425	0.0495
ENSGMOP00000000868	1	200	143811354	Q15436	SEC23A	CLSD	Protein transport protein Sec23A	0.225075	0.974186	0.5155	0.00009
ENSGMOP00000011102	2	200	294862538	Q04637	EIF4G1	EIF-4G1; EIF4G; EIF4F; EIF4GI; PARK18; P220	Eukaryotic translation initiation factor 4 gamma 1	0.295823	0.965843	0.5927	0.0012
ENSGMOP00000021936;ENSGMOP00000022011	1	1199.08	121992	P16104	H2AFX	H2A/X; H2A.X; H2AX	Histone H2AX	0.497848	0.934512	0.3457	0.01
ENSGMOP00000019057	1	198.559	108864726	Q9H6S3	EPS8L2	EPS8R2	Epidermal growth factor receptor kinase substrate 8-like protein 2	0.269231	0.909211	0.6104	0.0027
ENSGMOP00000017340	1	99.8799	147744563	P26927	MST1	MSP; HGFL; D3F15S2; DNF15S2; NF15S2	Hepatocyte growth factor-like protein	0.385634	0.867416	0.7807	0.0262
ENSGMOP00000005227	1	100	56405304	O75643	SNRNP200	ASCC3L1; BRR2; RP33; U5-200KD; HELIC2	U5 small nuclear ribonucleoprotein 200 kDa helicase	0.240115	0.755607	0.7724	0.0254
ENSGMOP00000007415	3	399.82	461853	P35221	CTNNA1	CAP102	Catenin alpha-1	0.500232	0.705025	0.0455	0.0064
ENSGMOP00000001246	3	400	71151996	Q13765	NACA	HSD48; NACA1; skNAC	Nascent polypeptide-associated complex subunit alpha	0.380451	0.691348	0.26	0.003
ENSGMOP00000008660	1	100	56405344	P52789	HK2	HXK2; HKII	Hexokinase-2	0.13051	0.683917	0.9276	0.0172
ENSGMOP00000016727	1	200	51338665	P62314	SNRPD1	HsT2456; SMD1; SNRPD; Sm-D1	Small nuclear ribonucleoprotein Sm D1	0.275556	0.680956	0.4101	0.0087
ENSGMOP00000001644	1	99.9947	20532400	P38919	EIF4A3	MUK34; NMP265; NUK34; eIF4AIII; RCPS; DDX48	Eukaryotic initiation factor 4A-III	0.402265	0.676648	0.5788	0.0397
ENSGMOP00000007282	5	786.852	400245	P31153	MAT2A	MATII; SAMS2; MATA2	S-adenosylmethionine synthase isoform type-2	0.329541	0.658884	0.1791	0.0018
ENSGMOP00000009803	5	596.799	17380569	Q13596	SNX1	VPS5; HsT17379	Sorting nexin-1522 aa protein	0.16666	0.641105	0.8574	0.0178
ENSGMOP00000020569	1	100	353526346	Q9BZZ5	API5	AAC11; AAC-11	Apoptosis inhibitor 5	0.242377	0.592167	0.5234	0.0204
ENSGMOP00000005544	1	195.138	108935868	Q9Y263	PLAA	PLA2P; PLAP; DOA1	Phospholipase A-2-activating protein	0.234756	0.557297	0.4882	0.03
ENSGMOP00000013850	1	100	88909266	Q16630	CPSF6	HPBRII-4; HPBRII-7; CFIM; CFIM68	Cleavage and polyadenylation specificity factor subunit 6	0.16174	0.546932	0.825	0.02
ENSGMOP00000015750	4	599.076	116241365	P21333	FLNA	ABPX; FLN; XMVD; FLN1; OPD2; FMD; MNS; FLN-A; NHBP; ABP-280; CVD1; XLVD; CSBS; OPD1; OPD	Filamin-A	0.228098	0.508261	0.2142	0.0017
ENSGMOP00000015542	3	299.838	31077035	Q9BS26	ERP44	TXNDC4; PDIA10	Endoplasmic reticulum resident protein 44	-0.000734533	0.506249	0.9873	0.0001
ENSGMOP00000002198	1	100	269849752	O60841	EIF5B	IF2	Eukaryotic translation initiation factor 5B	0.213569	0.479838	0.681	0.0423
ENSGMOP00000016320	1	100	74753038	Q9NX46	ADPRHL2	ARH3	Poly(ADP-ribose) glycohydrolase ARH3	0.308322	0.467805	0.3716	0.0323
ENSGMOP00000002317	3	600	51701791	Q76KA2	RPL30	-	60S ribosomal protein L30	0.0438483	0.452244	0.993	0.033
ENSGMOP00000019121	3	299.88	296439506	Q92616	GCN1L1	PRIC295; GCN1L1; GCN1L	Translational activator GCN1	0.184472	0.451592	0.6131	0.025
ENSGMOP00000017039	2	199.7	6685390	Q9Y295	DRG1	NEDD3	Developmentally-regulated GTP-binding protein 1	0.168705	0.441862	0.7261	0.0488
ENSGMOP00000007872	1	199.892	57015285	O75390	CS	-	Citrate synthase, mitochondrial	0.220389	0.415528	0.1204	0.0015
ENSGMOP00000018685;ENSGMOP00000018694	3	400	20532409	P43686	PSMC4	RPT3; MIP224; TBP-7; S6; TBP7	26S protease regulatory subunit 6B	0.182692	0.412609	0.3601	0.0068
ENSGMOP00000015947	3	398.742	68566146	Q9NQW7	XPNPEP1	SAMP; XPNPEPL; APP1; XPNPEPL1; XPNPEP	Xaa-Pro aminopeptidase 1	0.0532296	0.41176	0.7573	0.0004
ENSGMOP00000007812;ENSGMOP00000007817	1	100	113019	P16219	ACADS	ACAD3; SCAD	Short-chain specific acyl-CoA dehydrogenase, mitochondrial	0.0940771	0.406932	0.94	0.0431
ENSGMOP00000020011	2	200	205371746	P53621	COPA	AILJK; HEP-COP	Coatomer subunit alpha	0.0584172	0.402752	0.8723	0.0342
ENSGMOP00000011292	1	100	18202039	O43396	TXNL1	HEL-S-114; TRP32; TXNL; Txl; TXL-1	Thioredoxin-like protein 1	0.029664	0.391181	0.8787	0.0316
ENSGMOP00000020947	3	483.482	205371761	P23588	EIF4B	PRO1843; EIF-4B	Eukaryotic translation initiation factor 4B	0.188087	0.332255	0.1615	0.0051
ENSGMOP00000001349	3	399.085	116241311	P53618	COPB1	COPB	Coatomer subunit beta	0.0842571	0.318478	0.6251	0.0158
ENSGMOP00000016694	3	399.785	62287123	Q9BY49	PECR	SDR29C1; TERP; DCRRP; HPDHASE; HSA250303; PVIARL	Peroxisomal trans-2-enoyl-CoA reductase	0.0842893	0.310759	0.8294	0.0358
ENSGMOP00000008711	1	100	62287155	Q8NC96	NECAP1	EIEE21	Adaptin ear-binding coat-associated protein 1	0.108381	0.307787	0.6234	0.0365
ENSGMOP00000002344	4	580.137	313104306	Q92945	KHSRP	FUBP2; FBP2; KSRP	Far upstream element-binding protein 2	0.0741161	0.273274	0.9026	0.0433
ENSGMOP00000002821	3	400	2500345	P55769	SNU13	NHPX; SSFA1; FA-1; FA1; NHP2L1; SNRNP15-5; 15.5K; SPAG12; OTK27	NHP2-like protein 1	0.0789528	0.267608	0.6536	0.026
ENSGMOP00000005603	2	299.94	51338626	P84100	Rpl19	-	60S ribosomal protein L19	-0.0387595	-0.311056	0.9467	0.0366
ENSGMOP00000011300	1	99.94	74718831	Q9HC38	GLOD4	C17orf25; HC71; CGI-150	Glyoxalase domain-containing protein 4313 aa protein	-0.290057	-0.314187	0.0441	0.0263
ENSGMOP00000011101	29	6439.57	120649	P04406	GAPDH	G3PD; HEL-S-162eP; GAPD	Glyceraldehyde-3-phosphate dehydrogenase	-0.135035	-0.31445	0.2815	0.0114
ENSGMOP00000017521	8	1196.35	158513330	A5LHX3	PSMB11	BETA5T	Proteasome subunit beta type-11	-0.133452	-0.315287	0.3906	0.017
ENSGMOP00000009495	2	394.01	1346143	P35754	GLRX	GRX; GRX1	Glutaredoxin-1	-0.159944	-0.318607	0.2536	0.0109
ENSGMOP00000011624	3	399.348	7388073	Q9Y3U8	RPL36	L36	60S ribosomal protein L36105 aa protein	-0.118671	-0.326998	0.6329	0.0483
ENSGMOP00000000289;ENSGMOP00000000601;ENSGMOP00000001227;ENSGMOP00000001707;ENSGMOP00000002197;ENSGMOP00000002553;ENSGMOP00000002647;ENSGMOP00000002830;ENSGMOP00000004799;ENSGMOP00000004841;ENSGMOP00000005262;ENSGMOP00000005704;ENSGMOP00000005958;ENSGMOP00000008899;ENSGMOP00000009675;ENSGMOP00000010559;ENSGMOP00000011453;ENSGMOP00000011672;ENSGMOP00000012011;ENSGMOP00000012063;ENSGMOP00000013588;…	1	100	8928170	O15553	MEFV	MEF; TRIM20; FMF	Pyrin	-0.25403	-0.328808	0.0987	0.0221
ENSGMOP00000015032	16	3180.46	74722492	Q58FF7	HSP90AB3P	HSPCP1; HSP90BC	Putative heat shock protein HSP 90-beta-3	-0.18326	-0.333939	0.3699	0.0431
ENSGMOP00000000808	5	998.44	113950	P07355	ANXA2	LPC2; ANX2L4; LIP2; LPC2D; PAP-IV; ANX2; P36; HEL-S-270; CAL1H	Annexin A2	-0.0716339	-0.339638	0.6165	0.009
ENSGMOP00000020138	8	1297.38	308153402	P46952	HAAO	3-HAO; HAO	3-hydroxyanthranilate 3,4-dioxygenase	-0.171441	-0.343452	0.2375	0.0114
ENSGMOP00000004873	11	1598.14	74755898	Q5R3I4	TTC38	LL22NC03-5H6.5	Tetratricopeptide repeat protein 38	-0.175998	-0.345203	0.1812	0.0117
ENSGMOP00000008357	5	873.741	54035971	Q6EWQ7	EIF5A	-	Eukaryotic translation initiation factor 5A-1	-0.0971048	-0.35208	0.5671	0.0145
ENSGMOP00000001492	5	692.738	12643324	Q9UBR2	CTSZ	CTSX	Cathepsin Z	-0.188811	-0.35702	0.2565	0.0146
ENSGMOP00000007276	28	3383.45	300669605	P04114	APOB	FLDB; LDLCQ4; apoB-100; apoB-48	Apolipoprotein B-100	-0.3597	-0.357694	0.033	0.0418
ENSGMOP00000018183	4	799.399	6166568	Q92597	NDRG1	PROXY1; TARG1; CMT4D; GC4; RTP; TDD5; DRG1; DRG-1; NDR1; NMSL; RIT42; CAP43; HMSNL	Protein NDRG1	-0.210678	-0.361397	0.0577	0.0018
ENSGMOP00000010977	11	2079.21	21264427	P30711	GSTT1	-	Glutathione S-transferase theta-1	-0.150608	-0.361655	0.3904	0.0307
ENSGMOP00000015978	11	2452.58	2498525	Q14108	SCARB2	LIMPII; SR-BII; LIMP-2; HLGP85; CD36L2; AMRF; EPM4; LGP85	Lysosome membrane protein 2	-0.0262674	-0.363306	0.9655	0.013
ENSGMOP00000021132	16	2482.53	2507169	P32119	PRDX2	NKEF-B; PRXII; PTX1; PRP; TSA; NKEFB; PRX2; TPX1; HEL-S-2a; TDPX1	Peroxiredoxin-2	-0.241215	-0.365467	0.1175	0.0236
ENSGMOP00000010716	1	288.931	47117648	P61160	ACTR2	ARP2	Actin-related protein 2	-0.100425	-0.366987	0.5189	0.0025
ENSGMOP00000004232	1	200	12643815	Q9NQP4	PFDN4	PFD4; C1	Prefoldin subunit 4	-0.118501	-0.374458	0.4034	0.002
ENSGMOP00000006159	9	1097.63	292495088	Q00796	SORD	HEL-S-95n; SORD1	Sorbitol dehydrogenase	-0.126292	-0.377636	0.5478	0.0072
ENSGMOP00000014776	5	600	114039	P02649	APOE	AD2; APO-E; LPG; LDLCQ5	Apolipoprotein E	-0.231875	-0.37967	0.1106	0.0142
ENSGMOP00000020488	2	300	1706870	P30043	BLVRB	FLR; SDR43U1; BVRB; HEL-S-10	Flavin reductase (NADPH)	-0.0990091	-0.381605	0.6242	0.009
ENSGMOP00000003528	2	274.4	269849532	Q8IZ83	ALDH16A1	-	Aldehyde dehydrogenase family 16 member A1802 aa protein	-0.324999	-0.383178	0.062	0.0455
ENSGMOP00000015878;ENSGMOP00000015857;ENSGMOP00000015903;ENSGMOP00000015920;ENSGMOP00000015940	1	100	54035724	Q8WZ55	BSND	BART; DFNB73	Barttin320 aa protein	-0.227141	-0.384888	0.3334	0.0348
ENSGMOP00000007970	1	100	62511129	Q9BQ04	RBM4B	ZCCHC21B; ZCRB3B; RBM4L; ZCCHC15; RBM30	RNA-binding protein 4B	-0.225139	-0.398443	0.1764	0.0062
ENSGMOP00000016643	2	472.188	461897	P33402	GUCY1A2	GUC1A2; GC-SA2	Guanylate cyclase soluble subunit alpha-2	-0.116208	-0.399867	0.6242	0.0182
ENSGMOP00000002343	22	3292.06	357529509	Q04446	GBE1	GSD4; GBE; APBD	1,4-alpha-glucan-branching enzyme	-0.137193	-0.407746	0.5171	0.0123
ENSGMOP00000019618	10	1198.44	21542417	Q14764	MVP	LRP; VAULT1	Major vault protein	-0.0304968	-0.408617	0.9999	0.0302
ENSGMOP00000010214	8	1097.04	1706799	P02671	FGA	Fib2	Fibrinogen alpha chain	0.0339191	-0.414467	0.9962	0.0459
ENSGMOP00000008839	2	4178.13	55977480	P68371	TUBB4B	TUBB2C; TUBB2; Beta2	Tubulin beta-4B chain	-0.120849	-0.421606	0.4856	0.0016
ENSGMOP00000011522	1	493.703	38372507	Q9UBF8	PI4KB	PI4KIIIBETA; PIK4CB; NPIK; PI4K-BETA; PI4KBETA; PI4K92	Phosphatidylinositol 4-kinase beta	0.0683181	-0.447929	0.9442	0.0281
ENSGMOP00000020380	4	499.46	52788294	Q99536	VAT1	VATI	Synaptic vesicle membrane protein VAT-1 homolog393 aa protein	-0.027023	-0.464683	0.995	0.0336
ENSGMOP00000011905	16	2592.6	300680961	P0CG30	GSTT2B	GSTT2P	Glutathione S-transferase theta-2B	-0.127965	-0.469053	0.5713	0.009
ENSGMOP00000015560	1	100	1351366	P13807	GYS1	GSY; GYS	Glycogen [starch] synthase, muscle737 aa protein	-0.0665685	-0.470611	0.977	0.0132
ENSGMOP00000014662	2	192.981	74753513	Q9Y5Z4	HEBP2	SOUL; C6ORF34B; PP23; C6orf34	Heme-binding protein 2	-0.318639	-0.477928	0.0623	0.0055
ENSGMOP00000014889;ENSGMOP00000014894;ENSGMOP00000014908	2	200	47117209	Q86SG7	LYG2	LYGH	Lysozyme g-like protein 2	0.0224323	-0.47807	0.9992	0.0011
ENSGMOP00000019018	2	499.085	3024525	Q15286	RAB35	RAY; H-ray; RAB1C	Ras-related protein Rab-35	-0.295241	-0.503598	0.0186	0.0001
ENSGMOP00000004199	1	100	114392	P05026	ATP1B1	ATP1B	Sodium/potassium-transporting ATPase subunit beta-1	-0.0940512	-0.51089	0.8367	0.0393
ENSGMOP00000021750	1	198.332	327478592	Q86UQ4	ABCA13	-	ATP-binding cassette sub-family A member 135058 aa protein	-0.240845	-0.511144	0.2223	0.0031
ENSGMOP00000002585	2	199.459	74733765	Q9H857	NT5DC2	-	5'-nucleotidase domain-containing protein 2520 aa protein	0.0313663	-0.517159	0.9703	0.0213
ENSGMOP00000010901	2	398.439	1169929	P15104	GLUL	GS; PIG43; GLNS; PIG59	Glutamine synthetase	-0.0222581	-0.529989	0.8853	0.0147
ENSGMOP00000005618	1	100	156637353	P49247	RPIA	RPI; RPIAD	Ribose-5-phosphate isomerase	-0.0990654	-0.533302	0.834	0.0189
ENSGMOP00000011524	7	972.524	74718025	Q9H0W9	C11orf54	PTOD012; PTD012	Ester hydrolase C11orf54315 aa protein	-0.162557	-0.570486	0.6136	0.0114
ENSGMOP00000008151	1	100	3024406	Q13526	PIN1	UBL5; DOD	Peptidyl-prolyl cis-trans isomerase NIMA-interacting 1	-0.405988	-0.579078	0.0829	0.0171
ENSGMOP00000021379	1	300	145559535	O95361	TRIM16	EBBP	Tripartite motif-containing protein 16	-0.492292	-0.581686	0.0461	0.024
ENSGMOP00000014056	1	298.762	20141568	P48735	IDH2	IDP; IDPM; mNADP-IDH; IDH; IDHM; D2HGA2; ICD-M	Isocitrate dehydrogenase [NADP], mitochondrial	-0.359523	-0.585135	0.1303	0.0167
ENSGMOP00000017329;ENSGMOP00000017338;ENSGMOP00000017350;ENSGMOP00000017365	2	288.871	6016173	P78417	GSTO1	GSTTLp28; HEL-S-21; SPG-R; GSTO 1-1; P28	Glutathione S-transferase omega-1	-0.00463011	-0.595235	0.9932	0.0207
ENSGMOP00000011938	2	200	21264511	O76038	SCGN	CALBL; setagin; DJ501N12.8; SEGN; SECRET	Secretagogin	-0.437332	-0.595342	0.1515	0.0392
ENSGMOP00000016838	5	774.872	115456	P00918	CA2	CA-II; CAII; HEL-76; CAC; HEL-S-282; Car2	Carbonic anhydrase 2	-0.0847122	-0.605555	0.875	0.0133
ENSGMOP00000011156	28	5963.13	313104271	P02787	TF	HEL-S-71p; PRO1557; PRO2086; TFQTL1	Serotransferrin	-0.274041	-0.609015	0.3149	0.0277
ENSGMOP00000014788	2	486.928	114016	P02654	APOC1	ApoC-I; Apo-CI	Apolipoprotein C-I	-0.659786	-0.621825	0.0202	0.04
ENSGMOP00000014619	1	200	5921173	O75531	BANF1	D14S1460; BCRP1; NGPS; BAF	Barrier-to-autointegration factor	-0.466056	-0.63966	0.1624	0.0423
ENSGMOP00000002804	2	200	2498259	Q14894	CRYM	DFNA40; THBP	Ketimine reductase mu-crystallin	-0.152672	-0.647719	0.5268	0.0409
ENSGMOP00000010532	1	100	20137929	Q9BPU6	DPYSL5	CRAM; CRMP5; Ulip6; CRMP-5	Dihydropyrimidinase-related protein 5	-0.0818915	-0.660584	0.7415	0.0004
ENSGMOP00000000932	2	200	46577593	P60983	GMFB	GMF	Glia maturation factor beta	-0.103365	-0.663388	0.5498	0.0017
ENSGMOP00000004430	17	2588.99	122335	P02008	HBZ	HBZ1; HBZ-T1	Hemoglobin subunit zeta	0.00286057	-0.671512	0.9983	0.0461
ENSGMOP00000012512	2	387.271	123055	P05546	SERPIND1	D22S673; HCII; HC2; LS2; HCF2; HLS2; THPH10	Heparin cofactor 2	-0.492188	-0.685502	0.1624	0.0473
ENSGMOP00000013962	2	200	60267755	P26639	TARS	ThrRS	Threonine--tRNA ligase, cytoplasmic	-0.166006	-0.68587	0.8361	0.0498
ENSGMOP00000007509	1	99.2188	67461081	Q9HA72	CALHM2	FAM26B	Calcium homeostasis modulator protein 2	-0.294739	-0.696599	0.3688	0.0119
ENSGMOP00000020783	1	100	462567	P34949	MPI	PMI; PMI1; CDG1B	Mannose-6-phosphate isomerase	-0.183067	-0.700245	0.7663	0.028
ENSGMOP00000020043	6	896.286	46576349	O00748	CES2	CE-2; PCE-2; CES2A1; iCE	Cocaine esterase	-0.331907	-0.719862	0.1348	0.0017
ENSGMOP00000001484;ENSGMOP00000005683;ENSGMOP00000012126;ENSGMOP00000013330	3	2092.65	54036667	P68035	Actc1	-	Actin, alpha cardiac muscle 1	-0.297239	-0.730061	0.203	0.0027
ENSGMOP00000019718	2	199.832	1706921	P49914	MTHFS	HsT19268	5-formyltetrahydrofolate cyclo-ligase	-0.300123	-0.744172	0.2479	0.001
ENSGMOP00000016891	3	299.94	1169204	P42126	ECI1	DCI	Enoyl-CoA delta isomerase 1, mitochondrial	-0.0631086	-0.757121	0.9381	0.0285
ENSGMOP00000014708	1	190.09	121756	P11168	SLC2A2	GLUT2	Solute carrier family 2, facilitated glucose transporter member 2	-0.0320846	-0.779414	1	0.0018
ENSGMOP00000000442;ENSGMOP00000009372	1	100	74749397	Q6UWP2	DHRS11	ARPG836; SDR24C1	Dehydrogenase/reductase SDR family member 11	-0.363533	-0.799073	0.4033	0.0138
ENSGMOP00000005014	2	200	2507533	P06132	UROD	PCT; UPD	Uroporphyrinogen decarboxylase	-0.300355	-0.806014	0.2872	0.0015
ENSGMOP00000017885	1	97.8992	25453448	P14920	DAO	DAMOX; OXDA; DAAO	D-amino-acid oxidase	-0.176235	-0.819934	0.9062	0.0215
ENSGMOP00000008247	4	400	134907	P04278	SHBG	TEBG; ABP; SBP	Sex hormone-binding globulin	-0.43984	-0.83989	0.2487	0.0241
ENSGMOP00000007235	3	300	139653	P04004	VTN	V75; VN; VNT	Vitronectin	-0.611016	-0.848688	0.0282	0.0019
ENSGMOP00000000896	3	299.88	322510066	Q9UP65	PLA2G4C	CPLA2-gamma	Cytosolic phospholipase A2 gamma	-0.120736	-0.951821	0.7578	0.0023
ENSGMOP00000020787	1	100	166203665	Q06033	ITIH3	SHAP; H3P; ITI-HC3	Inter-alpha-trypsin inhibitor heavy chain H3	0.0310286	-0.974136	0.8362	0.003
ENSGMOP00000000113	1	499.099	1173177	P46783	RPS10	S10; DBA9	40S ribosomal protein S10165 aa protein	0.016946	-0.975814	0.9864	0.0048
ENSGMOP00000000770	2	400	116241237	P53396	ACLY	ATPCL; ACL; CLATP	ATP-citrate synthase	-0.187991	-0.984435	0.6652	0.0156
ENSGMOP00000013669	2	300	116242799	Q01082	SPTBN1	ELF; SPTB2; betaSpII; HEL102	Spectrin beta chain, non-erythrocytic 1	-0.518788	-0.998043	0.1985	0.0119
ENSGMOP00000007776	1	200	34395507	Q96HD9	ACY3	ACY-3; HCBP1	N-acyl-aromatic-L-amino acid amidohydrolase (carboxylate-forming)	-0.123927	-1.05221	0.9445	0.0116
ENSGMOP00000018853	2	199.3	23831324	O43252	PAPSS1	SK1; PAPSS; ATPSK1	Bifunctional 3'-phosphoadenosine 5'-phosphosulfate synthase 1	-0.416056	-1.07548	0.1222	0.00009
ENSGMOP00000015231	1	100	59797948	Q8IUN9	CLEC10A	CLECSF13; MGL; CD301; CLECSF14; HML; HML2	C-type lectin domain family 10 member A	-0.347805	-1.15945	0.2056	0.0005
ENSGMOP00000011656	1	198.412	148886617	Q8IVF7	FMNL3	WBP3; FHOD3; FRL2; WBP-3	Formin-like protein 3	-0.161654	-1.50698	0.7982	0.0015
ENSGMOP00000013838	3	399.731	93163358	P06727	APOA4	-	Apolipoprotein A-IV	-0.73699	-1.52941	0.067	0.0002
