# Supplementary material for: Quantitative analyses of the hepatic proteome of methylmercury-exposed Atlantic cod (Gadus morhua) suggest oxidative stress-mediated effects on cellular energy metabolism
Source: BMC Genomics. 2016 Aug 5;17:554. doi: 10.1186/s12864-016-2864-2 (PMC4974784; doi:10.1186/s12864-016-2864-2)
Supplement: Additional file 3: Table S2. — Full list of 1143 quantified proteins and associated data from label-free proteomics analysis of liver protein samples from controls (n = 10), 0.5 mg/kg BW MeHg (n = 9) and 2 mg/kg BW MeHg (n = 9) fish. (XLSX 610 kb) [file 12864_2016_2864_MOESM3_ESM.xlsx]

## Sheet: RawData
									Normalized abundance
Accession	Peptide count	Peptides used for quantitation	Confidence score	Anova (p)	Max fold change	Highest mean condition	Lowest mean condition	Description	Control_1	Control_2	Control_3	Control_4	Control_5	Control_6	Control_7	Control_8	Control_9	Control_10	MeHg_2mg_1	MeHg_2mg_2	MeHg_2mg_3	MeHg_2mg_4	MeHg_2mg_5	MeHg_2mg_6	MeHg_2mg_7	MeHg_2mg_8	MeHg_2mg_9	MeHg_0.5mg_1	MeHg_0.5mg_2	MeHg_0.5mg_3	MeHg_0.5mg_4	MeHg_0.5mg_5	MeHg_0.5mg_6	MeHg_0.5mg_7	MeHg_0.5mg_8	MeHg_0.5mg_9
ENSGMOP00000020430	11	9	1778.78	0.00187616	1.21431	0,5	2	pep:known_by_projection genescaffold:gadMor1:GeneScaffold_3842:50239:55678:-1 gene:ENSGMOG00000019004 transcript:ENSGMOT00000020931 gene_biotype:protein_coding transcript_biotype:protein_coding	2.83943e+06	2.67109e+06	3.09194e+06	2.96495e+06	3.0709e+06	2.82486e+06	3.64676e+06	3.06993e+06	3.54888e+06	3.06305e+06	3.676e+06	4.01062e+06	2.73014e+06	2.63111e+06	3.11355e+06	2.46988e+06	3.16985e+06	3.00317e+06	2.87771e+06	4.57797e+06	3.86095e+06	3.56679e+06	3.66353e+06	3.22437e+06	3.37936e+06	4.02929e+06	3.66354e+06	3.64877e+06
ENSGMOP00000009128	5	3	600	0.00526297	1.22416	Kontrol	2	pep:known_by_projection genescaffold:gadMor1:GeneScaffold_1838:11520:16260:1 gene:ENSGMOG00000008533 transcript:ENSGMOT00000009377 gene_biotype:protein_coding transcript_biotype:protein_coding	782516	593332	711912	767044	727387	588860	617802	848792	714622	595506	592833	556588	493350	617948	510939	551021	607810	630791	546700	440105	630900	724315	511155	587474	722126	495505	601521	497801
ENSGMOP00000012135	2	2	300	0.0206082	27.2765	0,5	Kontrol	pep:known_by_projection scaffold:gadMor1:scaffold00750:8501:15097:-1 gene:ENSGMOG00000011349 transcript:ENSGMOT00000012461 gene_biotype:protein_coding transcript_biotype:protein_coding	8811.87	8440.46	10123.7	7013.31	9357.75	4426.95	4716.44	4383.95	14369.9	19515.3	41851.7	9194.07	8321.75	8476.27	8938.4	8004.51	10593	10523.9	10583.6	7285.53	10650.1	14186.5	1.54473e+06	404754	5498.66	14780.5	212642	23336.8
ENSGMOP00000001602	5	4	688.931	0.0140198	1.19517	Kontrol	0,5	pep:known_by_projection genescaffold:gadMor1:GeneScaffold_2597:211102:217771:-1 gene:ENSGMOG00000001535 transcript:ENSGMOT00000001659 gene_biotype:protein_coding transcript_biotype:protein_coding	601229	572970	809659	597236	616934	579762	560004	723445	552091	626981	467012	456467	481927	646025	529934	572696	462587	557785	541086	587891	479469	508994	397191	608986	567229	374390	620440	554546
ENSGMOP00000019018	4	2	499.085	0.000245053	1.41775	Kontrol	2	pep:known_by_projection genescaffold:gadMor1:GeneScaffold_2106:292569:305674:-1 gene:ENSGMOG00000017688 transcript:ENSGMOT00000019478 gene_biotype:protein_coding transcript_biotype:protein_coding	70461.1	61358.4	68631	59324.5	61039	59999.8	46462.9	77605.9	40359.2	58232.3	39879.7	43099.7	37429.1	33982.7	50270.2	43053.8	45039.2	47766.7	42571	43368.8	57943.4	48629.7	55945	57697.6	47842.4	43167.5	41057.4	46961.9
ENSGMOP00000014788	2	2	486.928	0.019253	1.57985	Kontrol	0,5	pep:known_by_projection genescaffold:gadMor1:GeneScaffold_4633:149149:149632:1 gene:ENSGMOG00000013853 transcript:ENSGMOT00000015169 gene_biotype:protein_coding transcript_biotype:protein_coding	1.78085e+06	1.78934e+06	670892	1.42936e+06	1.24119e+06	1.35666e+06	1.38962e+06	1.40859e+06	694095	2.37642e+06	1.0376e+06	924742	1.19366e+06	1.19467e+06	633330	1.1069e+06	532185	957719	687415	1.44994e+06	643339	923696	1.23088e+06	665183	509507	1.22957e+06	615452	785928
ENSGMOP00000013767	3	2	398.799	0.0382485	1.15496	Kontrol	0,5	pep:known_by_projection genescaffold:gadMor1:GeneScaffold_633:247660:248985:1 gene:ENSGMOG00000012870 transcript:ENSGMOT00000014129 gene_biotype:protein_coding transcript_biotype:protein_coding	1.30847e+06	1.11379e+06	1.07459e+06	1.14336e+06	1.23946e+06	1.13647e+06	1.33253e+06	1.26485e+06	1.16954e+06	1.13795e+06	961272	1.17518e+06	1.07858e+06	747522	1.04874e+06	1.11616e+06	1.16308e+06	1.19039e+06	1.17001e+06	1.01142e+06	995109	830317	1.16022e+06	1.22257e+06	1.25243e+06	918084	1.03303e+06	866220
ENSGMOP00000007235	3	3	300	0.00295068	1.80086	Kontrol	2	pep:known_by_projection genescaffold:gadMor1:GeneScaffold_4258:33922:40170:-1 gene:ENSGMOG00000006797 transcript:ENSGMOT00000007439 gene_biotype:protein_coding transcript_biotype:protein_coding	278335	114867	345994	200374	289522	139091	361465	224486	124294	150538	95056.4	145053	119503	105701	118231	118438	139573	102172	170223	199881	181864	141361	103328	123064	143397	178957	122656	118937
ENSGMOP00000019115	2	2	197.043	0.0239524	1.1582	Kontrol	0,5	pep:known_by_projection genescaffold:gadMor1:GeneScaffold_241:65063:68163:1 gene:ENSGMOG00000017774 transcript:ENSGMOT00000019577 gene_biotype:protein_coding transcript_biotype:protein_coding	163311	116236	160865	143843	170835	153507	161667	194700	181098	141231	143787	130178	119973	147390	126712	130094	136902	162897	136003	139048	136817	132119	151057	129532	177582	123728	128196	115355
ENSGMOP00000007276	29	28	3383.45	0.0268441	1.28316	Kontrol	0,5	pep:known_by_projection genescaffold:gadMor1:GeneScaffold_1770:311007:326307:1 gene:ENSGMOG00000006804 transcript:ENSGMOT00000007482 gene_biotype:protein_coding transcript_biotype:protein_coding	6.56984e+06	5.17666e+06	4.52837e+06	4.11268e+06	4.20688e+06	4.63426e+06	5.23569e+06	5.03966e+06	3.50637e+06	8.2662e+06	3.03099e+06	3.41135e+06	3.74176e+06	4.3216e+06	3.84035e+06	4.99463e+06	4.13025e+06	4.50433e+06	4.03989e+06	5.03531e+06	3.11571e+06	3.04919e+06	4.6186e+06	3.59798e+06	4.62247e+06	4.9976e+06	3.31424e+06	3.61401e+06
ENSGMOP00000004106	25	20	4681.56	0.00881619	1.20646	Kontrol	2	pep:known_by_projection genescaffold:gadMor1:GeneScaffold_4582:140254:148895:-1 gene:ENSGMOG00000003878 transcript:ENSGMOT00000004233 gene_biotype:protein_coding transcript_biotype:protein_coding	4.37494e+07	4.84459e+07	7.03684e+07	5.9526e+07	5.59098e+07	4.76913e+07	6.66273e+07	6.02039e+07	5.52705e+07	5.01542e+07	4.81738e+07	4.36748e+07	4.55203e+07	4.75236e+07	4.4065e+07	4.16336e+07	5.24566e+07	4.59709e+07	4.72013e+07	6.16682e+07	5.05259e+07	4.99096e+07	4.00957e+07	5.02494e+07	4.54899e+07	4.47597e+07	4.25061e+07	4.99702e+07
ENSGMOP00000011300	1	1	99.94	0.02399	1.24331	Kontrol	2	pep:known_by_projection genescaffold:gadMor1:GeneScaffold_1511:784526:786626:1 gene:ENSGMOG00000010551 transcript:ENSGMOT00000011604 gene_biotype:protein_coding transcript_biotype:protein_coding	123919	76289.3	68414.5	97670.3	90667.1	100099	93231.1	94278	98756.4	67303.3	74369.5	80991.6	60416.4	68325	56866	68719.6	75032	105862	68598.3	99326.7	57745.9	76894.2	65753.3	70240.6	81119.1	79082.1	60786.8	79349.1
ENSGMOP00000016632;ENSGMOP00000016640	2	2	200	0.069085	1.76388	Kontrol	0,5	pep:known_by_projection genescaffold:gadMor1:GeneScaffold_4615:20419:23128:-1 gene:ENSGMOG00000015504 transcript:ENSGMOT00000017050 gene_biotype:protein_coding transcript_biotype:protein_coding	586911	573707	619126	333032	632249	1.14779e+06	611689	556372	864730	241773	118199	226816	903391	760127	327445	311557	297430	991879	1.35178e+06	143737	592941	332725	415972	122522	189763	156682	996113	196388
ENSGMOP00000007415	3	3	399.82	0.00899282	1.63017	2	Kontrol	pep:known_by_projection genescaffold:gadMor1:GeneScaffold_3590:3615864:3689759:1 gene:ENSGMOG00000006974 transcript:ENSGMOT00000007628 gene_biotype:protein_coding transcript_biotype:protein_coding	229906	177966	94573.4	169057	194963	103095	169144	136756	147034	67709.4	146303	192512	241626	256669	408272	334654	243928	189565	172833	124642	255478	224136	140557	296881	194128	220097	268853	172253
ENSGMOP00000000278;ENSGMOP00000000751;ENSGMOP00000000970;ENSGMOP00000001014;ENSGMOP00000003915;ENSGMOP00000004452;ENSGMOP00000005365;ENSGMOP00000009190;ENSGMOP00000010211;ENSGMOP00000010309;ENSGMOP00000010401;ENSGMOP00000011276;ENSGMOP00000011521;ENSGMOP00000014153;ENSGMOP00000014351;ENSGMOP00000016780;ENSGMOP00000017139;ENSGMOP00000017735;ENSGMOP00000018123;ENSGMOP00000018744;ENSGMOP00000018927;…	2	1	199.219	0.023149	1.4966	Kontrol	2	pep:known_by_projection contig::contig435722:100:618:-1 gene:ENSGMOG00000000276 transcript:ENSGMOT00000000287 gene_biotype:protein_coding transcript_biotype:protein_coding	2.52394e+06	2.52401e+06	4.79288e+06	2.4913e+06	2.26382e+06	2.42186e+06	2.20715e+06	3.28851e+06	2.78925e+06	5.92442e+06	2.34235e+06	1.24777e+06	2.31401e+06	2.90291e+06	1.82676e+06	1.81883e+06	2.06202e+06	2.12974e+06	2.13449e+06	2.32788e+06	2.29176e+06	2.98843e+06	2.25434e+06	1.5664e+06	3.42468e+06	1.26823e+06	1.59257e+06	2.265e+06
ENSGMOP00000018798	3	3	300	0.019969	1.13602	2	Kontrol	pep:known_by_projection genescaffold:gadMor1:GeneScaffold_708:2628:11783:1 gene:ENSGMOG00000017491 transcript:ENSGMOT00000019256 gene_biotype:protein_coding transcript_biotype:protein_coding	557644	424303	474844	611196	468039	490668	523288	587612	543006	494204	640051	569878	554427	594104	612753	591024	627011	616554	485029	541051	717354	605606	506047	522359	558735	555503	574374	621729
ENSGMOP00000010665	3	3	499.838	0.0589734	1.24861	0,5	Kontrol	pep:known_by_projection genescaffold:gadMor1:GeneScaffold_1111:173571:176003:1 gene:ENSGMOG00000009982 transcript:ENSGMOT00000010960 gene_biotype:protein_coding transcript_biotype:protein_coding	601538	658745	531107	584802	697235	612140	604605	458296	682773	524205	894639	963401	748940	681638	615677	542079	538106	716878	693535	932565	493072	891759	661170	669280	728359	983000	561033	772195
ENSGMOP00000006350	2	1	400	0.0655878	1.25399	Kontrol	0,5	pep:known_by_projection genescaffold:gadMor1:GeneScaffold_1668:302497:339788:-1 gene:ENSGMOG00000005954 transcript:ENSGMOT00000006535 gene_biotype:protein_coding transcript_biotype:protein_coding	663976	682843	760700	578536	715922	685748	607479	922410	353342	584410	658470	688581	575473	700467	565935	600195	602187	598351	557578	355590	477868	424027	511516	522872	660850	366978	728221	656927
ENSGMOP00000018183	4	4	799.399	0.00336843	1.28467	Kontrol	2	pep:known_by_projection genescaffold:gadMor1:GeneScaffold_1293:26555:49852:-1 gene:ENSGMOG00000016926 transcript:ENSGMOT00000018630 gene_biotype:protein_coding transcript_biotype:protein_coding	3.83541e+06	3.29781e+06	3.37843e+06	3.07805e+06	2.89611e+06	2.81578e+06	3.22912e+06	3.07098e+06	3.47958e+06	4.68871e+06	2.93275e+06	2.35177e+06	2.38469e+06	2.70512e+06	2.26328e+06	2.81259e+06	2.58875e+06	2.89727e+06	2.72199e+06	3.65092e+06	2.44228e+06	3.42386e+06	3.32649e+06	2.25878e+06	2.81893e+06	2.61607e+06	2.5534e+06	3.17279e+06
ENSGMOP00000017810	10	8	1761.99	0.0331738	1.1551	Kontrol	2	pep:known_by_projection genescaffold:gadMor1:GeneScaffold_3584:11982:13148:-1 gene:ENSGMOG00000016600 transcript:ENSGMOT00000018249 gene_biotype:protein_coding transcript_biotype:protein_coding	7.46611e+06	8.09548e+06	1.01446e+07	7.67892e+06	9.46617e+06	9.62588e+06	1.06226e+07	9.29428e+06	1.00115e+07	9.38356e+06	7.71599e+06	7.0822e+06	6.32662e+06	7.73765e+06	6.73509e+06	9.1722e+06	9.56538e+06	8.34944e+06	8.83305e+06	1.01791e+07	8.14552e+06	7.98706e+06	6.93219e+06	7.68923e+06	7.29407e+06	7.29531e+06	8.65483e+06	8.25001e+06
ENSGMOP00000003528	2	2	274.4	0.0404534	1.30421	Kontrol	2	pep:known_by_projection genescaffold:gadMor1:GeneScaffold_1917:58634:73557:1 gene:ENSGMOG00000003317 transcript:ENSGMOT00000003634 gene_biotype:protein_coding transcript_biotype:protein_coding	208680	210547	463495	323389	274828	324365	278145	334045	253074	326307	205432	268387	203633	207797	211418	211654	258757	248081	252902	318526	280153	288048	216605	247714	220896	120480	216371	244368
ENSGMOP00000014662	2	2	192.981	0.00884693	1.39274	Kontrol	2	pep:known_by_projection genescaffold:gadMor1:GeneScaffold_412:9043:11842:-1 gene:ENSGMOG00000013723 transcript:ENSGMOT00000015038 gene_biotype:protein_coding transcript_biotype:protein_coding	98860.3	95201.1	167710	144662	120815	115156	93690.5	127589	153206	116475	97335.9	50402.2	100519	89458.7	78633.6	85278.2	100232	110428	84721.9	117680	78784.8	139143	72753.7	84239.8	128311	82530.7	88573.3	98033.5
ENSGMOP00000019175	15	14	1697.1	0.0825595	1.14524	0,5	Kontrol	pep:known_by_projection genescaffold:gadMor1:GeneScaffold_1417:289959:299249:-1 gene:ENSGMOG00000017832 transcript:ENSGMOT00000019637 gene_biotype:protein_coding transcript_biotype:protein_coding	2.963e+06	2.47029e+06	3.35996e+06	2.71016e+06	2.51226e+06	2.176e+06	2.80272e+06	2.73279e+06	2.70218e+06	2.41405e+06	3.01294e+06	2.60823e+06	3.01859e+06	3.05085e+06	2.96939e+06	3.10433e+06	3.5389e+06	2.87482e+06	2.5513e+06	2.88086e+06	3.73186e+06	2.9723e+06	2.52761e+06	2.75799e+06	2.53093e+06	3.1278e+06	3.07082e+06	4.06784e+06
ENSGMOP00000013838	4	3	399.731	0.000398793	2.88667	Kontrol	2	pep:known_by_projection genescaffold:gadMor1:GeneScaffold_4590:100067:100629:1 gene:ENSGMOG00000012938 transcript:ENSGMOT00000014200 gene_biotype:protein_coding transcript_biotype:protein_coding	1.24171e+06	473583	621033	610270	416138	376009	842777	1.41516e+06	726106	1.81746e+06	290659	129188	266566	275163	208726	343253	353225	415238	380638	624495	247252	466278	682589	746067	819265	392584	377215	255908
ENSGMOP00000016435	4	4	600	0.0877315	1.15696	0,5	Kontrol	pep:known_by_projection genescaffold:gadMor1:GeneScaffold_1809:437887:438784:1 gene:ENSGMOG00000015348 transcript:ENSGMOT00000016850 gene_biotype:protein_coding transcript_biotype:protein_coding	2.26757e+06	2.24238e+06	1.51353e+06	2.49393e+06	2.38117e+06	2.4653e+06	3.37323e+06	2.21329e+06	2.37463e+06	1.96893e+06	2.51252e+06	3.32462e+06	2.46518e+06	2.39971e+06	3.00803e+06	2.32149e+06	2.74722e+06	2.42004e+06	2.20459e+06	2.44805e+06	2.55927e+06	2.6487e+06	2.18245e+06	2.83134e+06	2.54365e+06	3.19447e+06	3.00515e+06	2.84212e+06
ENSGMOP00000008562	1	1	100	0.0203053	1.17146	2	Kontrol	pep:known_by_projection genescaffold:gadMor1:GeneScaffold_260:892178:902204:-1 gene:ENSGMOG00000007997 transcript:ENSGMOT00000008803 gene_biotype:protein_coding transcript_biotype:protein_coding	63609.7	58263.1	50507.7	59831.5	55849.8	46899.3	68072.4	73817.7	63965.6	49908.6	74739	64670.1	62908.2	74137.2	78328	67262.2	75971.7	63018.7	61777.3	63049.7	74759.5	51799.5	57777.2	65642.7	72003.1	70639.9	72600	73004
ENSGMOP00000009860	1	1	100	0.106418	1.39649	Kontrol	0,5	pep:known_by_projection genescaffold:gadMor1:GeneScaffold_4092:55531:59128:1 gene:ENSGMOG00000009230 transcript:ENSGMOT00000010124 gene_biotype:protein_coding transcript_biotype:protein_coding	158068	84418.7	122023	118509	102902	58237.6	132952	163631	106292	68933.4	44594.6	107341	104514	74353.3	88474.1	121115	111635	62434.6	124437	69513.5	88235.9	78718.9	75356.6	99369.2	87243.6	63216	80553.1	77006.1
ENSGMOP00000017618	4	4	500	0.0260035	1.18837	Kontrol	2	pep:known_by_projection genescaffold:gadMor1:GeneScaffold_198:649:12465:-1 gene:ENSGMOG00000016427 transcript:ENSGMOT00000018052 gene_biotype:protein_coding transcript_biotype:protein_coding	842968	612652	999464	739055	655174	800783	734710	781451	727800	725070	514698	748073	571258	653987	603566	669081	574369	714978	720272	727529	814475	712125	555137	768370	538410	629583	665989	589661
ENSGMOP00000016076	1	1	100	0.121068	1.24366	Kontrol	0,5	pep:known_by_projection genescaffold:gadMor1:GeneScaffold_1701:270880:319754:1 gene:ENSGMOG00000015001 transcript:ENSGMOT00000016486 gene_biotype:protein_coding transcript_biotype:protein_coding	40950.9	47909	48389	50100.3	63055.1	46284.7	40520.9	62250	52049.8	36707.4	29909.2	35770.7	46028.8	60572	41356.2	45298.4	40196.7	41006.2	44444.1	19504.4	38536.3	32929.7	26713.8	60376.8	68085	19725.8	59597.5	27838.7
ENSGMOP00000013815	21	17	2672.14	0.0987467	1.18153	Kontrol	0,5	pep:known_by_projection genescaffold:gadMor1:GeneScaffold_3846:22184:33775:-1 gene:ENSGMOG00000012895 transcript:ENSGMOT00000014177 gene_biotype:protein_coding transcript_biotype:protein_coding	5.17845e+06	5.2839e+06	7.56098e+06	5.58921e+06	5.2348e+06	6.16932e+06	7.96136e+06	6.20893e+06	6.36588e+06	9.02128e+06	6.99535e+06	7.31734e+06	6.16408e+06	5.43164e+06	6.01227e+06	5.82857e+06	6.16795e+06	6.22319e+06	5.5414e+06	5.86531e+06	5.6258e+06	5.96162e+06	4.78571e+06	4.19173e+06	4.75512e+06	8.31808e+06	5.08052e+06	4.60398e+06
ENSGMOP00000008151	1	1	100	0.0234106	1.49389	Kontrol	2	pep:known_by_projection genescaffold:gadMor1:GeneScaffold_4029:54345:55990:1 gene:ENSGMOG00000007618 transcript:ENSGMOT00000008384 gene_biotype:protein_coding transcript_biotype:protein_coding	153063	84710.2	195185	113543	125250	91366.1	80426.3	147386	72602.9	91682	82737.2	88445.5	62010.4	103853	70864.7	81533.3	53775.2	73425.5	79316.9	129006	74429.4	74412.4	90709.6	47439.3	126672	93907.6	76960.3	71139.9
ENSGMOP00000000581	2	2	199.94	0.0948572	1.13747	0,5	Kontrol	pep:known_by_projection genescaffold:gadMor1:GeneScaffold_158:25055:27053:-1 gene:ENSGMOG00000000600 transcript:ENSGMOT00000000610 gene_biotype:protein_coding transcript_biotype:protein_coding	88546.6	62773.4	57755.2	80097.6	72783.1	60576.4	69916.9	76741.7	74092.2	65479.2	84516.7	75000.4	73993.2	85905.2	76017.1	76814.6	80765.5	93109.4	64109.3	72766.2	69357.5	76339.2	66477.1	74190.6	92262.6	105811	77538.6	90835
ENSGMOP00000014818	7	7	899.88	0.0599344	1.12206	Kontrol	2	pep:known_by_projection genescaffold:gadMor1:GeneScaffold_1368:19260:24145:-1 gene:ENSGMOG00000013869 transcript:ENSGMOT00000015200 gene_biotype:protein_coding transcript_biotype:protein_coding	2.95594e+06	2.50613e+06	3.79128e+06	2.60416e+06	2.73453e+06	2.37904e+06	2.79902e+06	3.07183e+06	2.67718e+06	2.84612e+06	2.0954e+06	2.55572e+06	2.24549e+06	2.52777e+06	2.49873e+06	2.5514e+06	2.62125e+06	2.95979e+06	2.6961e+06	2.56845e+06	2.57845e+06	2.21588e+06	2.33494e+06	2.3514e+06	2.71625e+06	2.8192e+06	2.47532e+06	2.88059e+06
ENSGMOP00000015669	7	7	800	0.119492	1.17922	Kontrol	0,5	pep:known_by_projection genescaffold:gadMor1:GeneScaffold_3984:25565:40098:1 gene:ENSGMOG00000014645 transcript:ENSGMOT00000016070 gene_biotype:protein_coding transcript_biotype:protein_coding	958993	1.18082e+06	1.05106e+06	983082	1.10438e+06	1.27309e+06	1.662e+06	1.47735e+06	1.49133e+06	1.26767e+06	846342	1.27199e+06	1.26594e+06	1.02892e+06	918565	1.15655e+06	1.10655e+06	1.07503e+06	1.16169e+06	980039	888896	1.41459e+06	1.05223e+06	1.22087e+06	1.14599e+06	896121	744292	1.15883e+06
ENSGMOP00000014061	2	2	200	0.0891407	1.26752	Kontrol	2	pep:known_by_projection genescaffold:gadMor1:GeneScaffold_4644:139694:147758:1 gene:ENSGMOG00000013142 transcript:ENSGMOT00000014424 gene_biotype:protein_coding transcript_biotype:protein_coding	132315	129422	167739	87436.2	112163	101602	94788.4	121812	84457.2	127229	92117.7	75233	70155.5	99022.6	117016	101490	90430.8	116111	61344.8	83749.8	104121	66112.5	176204	79658.4	102516	48550.6	74735.2	103557
ENSGMOP00000002353	4	3	499.076	0.10352	1.08155	0,5	Kontrol	pep:known_by_projection genescaffold:gadMor1:GeneScaffold_3335:62483:64702:1 gene:ENSGMOG00000002211 transcript:ENSGMOT00000002432 gene_biotype:protein_coding transcript_biotype:protein_coding	549838	592820	454387	618924	598388	648143	612005	617948	610678	584261	612293	589606	608749	648441	633324	590196	723041	670593	582945	612106	612839	622675	545770	623284	632112	700304	694291	687378
ENSGMOP00000020551	8	5	1085.68	0.010736	1.15337	2	Kontrol	pep:known_by_projection genescaffold:gadMor1:GeneScaffold_2650:40556:43649:-1 gene:ENSGMOG00000019109 transcript:ENSGMOT00000021053 gene_biotype:protein_coding transcript_biotype:protein_coding	483049	468406	506532	478540	526757	509114	455699	537964	475514	411078	618271	465391	623012	599369	547212	573268	589918	513062	507720	501356	583140	558942	437728	493620	520050	513913	625035	549033
ENSGMOP00000016823	3	1	398.977	0.0637485	1.31835	Kontrol	2	pep:known_by_projection genescaffold:gadMor1:GeneScaffold_1963:610694:613062:1 gene:ENSGMOG00000015685 transcript:ENSGMOT00000017242 gene_biotype:protein_coding transcript_biotype:protein_coding	17700.5	16194.5	15522.7	19593.4	12938.4	17122.6	10160.4	11944.1	9757.67	14213.3	10775.3	10884.8	10705.6	8301.04	11749.6	15005.6	9350.69	10457	11858.2	12736.5	10831.7	12735.3	15380.5	11607	17656.9	11330.5	7070.71	5982.22
ENSGMOP00000000289;ENSGMOP00000000601;ENSGMOP00000001227;ENSGMOP00000001707;ENSGMOP00000002197;ENSGMOP00000002553;ENSGMOP00000002647;ENSGMOP00000002830;ENSGMOP00000004799;ENSGMOP00000004841;ENSGMOP00000005262;ENSGMOP00000005704;ENSGMOP00000005958;ENSGMOP00000008899;ENSGMOP00000009675;ENSGMOP00000010559;ENSGMOP00000011453;ENSGMOP00000011672;ENSGMOP00000012011;ENSGMOP00000012063;ENSGMOP00000013588;…	1	1	100	0.0303074	1.25598	Kontrol	2	pep:novel genescaffold:gadMor1:GeneScaffold_4665:7235:9080:1 gene:ENSGMOG00000000289 transcript:ENSGMOT00000000300 gene_biotype:protein_coding transcript_biotype:protein_coding	86525.1	66050.8	138103	83655.3	88946.8	95987.3	77580.2	81877.7	112078	85203.4	68985	94812	85683	64002.5	61612.8	76396.4	84166.1	53494.6	67235.7	92081.4	83876	74352.1	64854.1	68320.7	68147.2	65392.5	83253.7	91029.7
ENSGMOP00000007674	29	23	4782.39	0.0255	1.42285	0,5	2	pep:known_by_projection genescaffold:gadMor1:GeneScaffold_1288:256485:263630:1 gene:ENSGMOG00000007199 transcript:ENSGMOT00000007895 gene_biotype:protein_coding transcript_biotype:protein_coding	4.68813e+07	3.77855e+07	8.30292e+07	6.02256e+07	5.2233e+07	3.91198e+07	5.2701e+07	7.23996e+07	7.57986e+07	3.81454e+07	6.86963e+07	3.80152e+07	3.79123e+07	4.87602e+07	4.74605e+07	3.6105e+07	5.31848e+07	5.20322e+07	6.08589e+07	8.36909e+07	7.67193e+07	6.34729e+07	4.17063e+07	5.79193e+07	1.02723e+08	7.26954e+07	6.70478e+07	6.4385e+07
ENSGMOP00000016371	4	3	397.519	0.153708	1.59236	Kontrol	0,5	pep:known_by_projection scaffold:gadMor1:scaffold07357:30403:32360:-1 gene:ENSGMOG00000015274 transcript:ENSGMOT00000016787 gene_biotype:protein_coding transcript_biotype:protein_coding	221621	187727	399263	110715	260256	403528	254991	259276	438958	123653	47603.7	92239.5	315495	231257	119909	156641	139644	375968	501743	169779	312943	154686	109065	61696.1	76149.7	97785.5	431278	90033.8
ENSGMOP00000021336	1	1	199.832	0.0644928	1.22692	2	Kontrol	pep:known genescaffold:gadMor1:GeneScaffold_3498:21299:21445:-1 gene:ENSGMOG00000019850 transcript:ENSGMOT00000021855 gene_biotype:protein_coding transcript_biotype:protein_coding	88042.3	75021.6	85612.3	73282.9	64069.9	90884.2	72583.4	77900.2	89056.5	71331.8	135242	111136	107962	88783.7	97331.5	82174.9	73193.2	90567.7	83502.6	86740.6	89230.2	112264	74871.2	61248.9	103756	147904	87267.4	99596.9
ENSGMOP00000014776	5	5	600	0.0222928	1.30104	Kontrol	2	pep:known_by_projection genescaffold:gadMor1:GeneScaffold_4633:142254:143685:1 gene:ENSGMOG00000013837 transcript:ENSGMOT00000015157 gene_biotype:protein_coding transcript_biotype:protein_coding	567423	696555	615672	538963	462009	556278	400037	459605	444500	578451	504527	319060	486466	443698	333469	442848	359901	368589	421211	624418	408278	384174	685800	385572	359637	331448	435324	462073
ENSGMOP00000016180	5	2	693.107	0.165292	1.41841	Kontrol	0,5	pep:known_by_projection genescaffold:gadMor1:GeneScaffold_1765:47941:59887:1 gene:ENSGMOG00000015093 transcript:ENSGMOT00000016594 gene_biotype:protein_coding transcript_biotype:protein_coding	278246	256675	985415	370726	320723	239300	269540	497725	302696	290758	325733	242842	399905	296268	289229	300799	277794	308600	195939	471163	296740	174103	204067	185984	340188	309291	218930	218174
ENSGMOP00000000638	1	1	99.94	0.16676	1.2039	0,5	Kontrol	pep:novel genescaffold:gadMor1:GeneScaffold_2389:24510:70291:-1 gene:ENSGMOG00000000653 transcript:ENSGMOT00000000668 gene_biotype:protein_coding transcript_biotype:protein_coding	324858	213680	249125	181440	185384	357799	319057	480525	224889	380680	295407	319562	299758	269614	293658	345194	421388	300394	344087	349231	293276	505072	412938	336204	303984	242132	374562	343680
ENSGMOP00000021132	16	16	2482.53	0.033881	1.2883	Kontrol	2	pep:known_by_projection genescaffold:gadMor1:GeneScaffold_2997:148413:153299:-1 gene:ENSGMOG00000019644 transcript:ENSGMOT00000021650 gene_biotype:protein_coding transcript_biotype:protein_coding	2.52573e+07	1.64139e+07	2.64777e+07	2.06724e+07	1.61803e+07	1.84305e+07	2.39345e+07	2.08769e+07	1.97133e+07	2.99274e+07	2.04406e+07	1.68364e+07	1.6302e+07	1.49291e+07	1.33788e+07	1.75517e+07	1.93204e+07	1.61935e+07	1.72604e+07	2.17911e+07	2.16678e+07	1.80527e+07	2.60894e+07	1.33477e+07	1.77676e+07	1.64399e+07	1.23457e+07	1.84014e+07
ENSGMOP00000019037	1	1	100	0.166401	1.33883	Kontrol	0,5	pep:known_by_projection genescaffold:gadMor1:GeneScaffold_4530:8210:13168:1 gene:ENSGMOG00000017709 transcript:ENSGMOT00000019497 gene_biotype:protein_coding transcript_biotype:protein_coding	27284.5	23285.7	9546.57	17005.2	26496.8	30499.9	27642.6	20849	17870.9	12975.7	20009.2	10119	13102.1	25999.8	16735.6	21038.3	16697	23144.8	19962.2	6204.38	14948.6	4524.38	28223.8	16067.2	15413.2	7454.27	31880.5	18775.3
ENSGMOP00000016538	4	3	399.554	0.0635762	1.25967	Kontrol	2	pep:known_by_projection genescaffold:gadMor1:GeneScaffold_906:456746:462238:1 gene:ENSGMOG00000015434 transcript:ENSGMOT00000016956 gene_biotype:protein_coding transcript_biotype:protein_coding	225910	277358	302069	336412	262135	316565	218626	335869	242138	273116	203545	187636	225595	205420	228533	230005	254762	235577	222452	227945	251101	248031	286147	221953	316876	104553	207371	280081
ENSGMOP00000007872	2	1	199.892	0.00313384	1.33379	2	Kontrol	pep:known_by_projection genescaffold:gadMor1:GeneScaffold_1600:178538:185296:-1 gene:ENSGMOG00000007367 transcript:ENSGMOT00000008101 gene_biotype:protein_coding transcript_biotype:protein_coding	95873.1	102897	82313.9	70584	89482.6	92821.1	87719.6	87425.4	75350.7	70443.9	108174	107515	130209	98411.6	109911	146578	130342	92082.2	103021	78395	131566	113292	112473	100615	69868.7	83792.2	98402.6	108007
ENSGMOP00000018853	2	2	199.3	0.000194686	2.10743	Kontrol	2	pep:known_by_projection genescaffold:gadMor1:GeneScaffold_4617:451577:469516:1 gene:ENSGMOG00000017531 transcript:ENSGMOT00000019312 gene_biotype:protein_coding transcript_biotype:protein_coding	3.10923e+06	1.96952e+06	7.51418e+06	3.17696e+06	3.65057e+06	2.36963e+06	2.76817e+06	4.0234e+06	3.48744e+06	2.52183e+06	1.3702e+06	2.08746e+06	1.21089e+06	1.49437e+06	1.57833e+06	1.863e+06	1.57901e+06	1.77196e+06	1.81721e+06	3.45643e+06	3.36224e+06	2.55669e+06	2.21732e+06	3.14617e+06	3.42924e+06	1.50992e+06	2.12858e+06	1.52581e+06
ENSGMOP00000010088	1	1	100	0.0580084	1.26578	0,5	2	pep:known_by_projection genescaffold:gadMor1:GeneScaffold_2552:51766:69532:1 gene:ENSGMOG00000009441 transcript:ENSGMOT00000010360 gene_biotype:protein_coding transcript_biotype:protein_coding	64204.8	38605.1	43849.8	62942.2	48087.7	44217.8	44170.1	56984.9	54168.2	61700.9	55622	43307	49675	50027.2	54324.3	61094.3	51865.3	39515.9	37058.3	67626.5	40372.7	70790	65959.9	48466.7	49375.4	76318.4	58096.9	83086
ENSGMOP00000014730	2	2	300	0.13964	1.18211	0,5	Kontrol	pep:known_by_projection genescaffold:gadMor1:GeneScaffold_4155:2566:42757:-1 gene:ENSGMOG00000013751 transcript:ENSGMOT00000015110 gene_biotype:protein_coding transcript_biotype:protein_coding	47341.2	48578.2	30556.3	54841.3	48565.6	51371.4	47513.5	57977.8	56255.7	33770	56771.7	49270.6	51358.9	57184.9	54943.5	56320.6	53193.9	55530.6	50628.4	46755.6	54428.3	48640.7	35871.9	53498.8	67992.7	77302	69760.4	52985.4
ENSGMOP00000017473;ENSGMOP00000003468	2	2	200	0.13591	1.21512	Kontrol	0,5	pep:novel genescaffold:gadMor1:GeneScaffold_3560:84656:86996:1 gene:ENSGMOG00000016291 transcript:ENSGMOT00000017904 gene_biotype:protein_coding transcript_biotype:protein_coding	621782	600937	855537	570649	651177	563264	568918	1.06717e+06	518227	511122	540186	881962	494815	540113	595062	763629	784891	544246	621119	553037	603260	586737	588200	520293	541637	323233	549313	569968
ENSGMOP00000004268	4	3	399.515	0.0498105	1.16924	Kontrol	2	pep:known genescaffold:gadMor1:GeneScaffold_1790:310079:313259:1 gene:ENSGMOG00000003990 transcript:ENSGMOT00000004399 gene_biotype:protein_coding transcript_biotype:protein_coding	1.63315e+06	1.401e+06	1.89563e+06	1.84438e+06	1.33183e+06	1.8785e+06	1.92762e+06	1.78539e+06	2.01868e+06	1.63238e+06	1.16059e+06	1.34832e+06	1.58162e+06	1.79682e+06	1.19792e+06	1.38557e+06	1.81268e+06	1.44871e+06	1.62143e+06	1.4969e+06	1.65117e+06	1.79506e+06	1.26445e+06	1.50548e+06	1.61253e+06	1.50924e+06	1.6712e+06	1.29449e+06
ENSGMOP00000021379	2	1	300	0.017376	1.60393	Kontrol	2	pep:novel contig::contig198074:5:319:-1 gene:ENSGMOG00000019892 transcript:ENSGMOT00000021897 gene_biotype:protein_coding transcript_biotype:protein_coding	436093	513645	635527	502469	383934	382288	542128	580993	520871	1.24582e+06	404773	207254	378830	458828	309143	309949	384200	408604	361368	389220	366151	671961	410003	288295	706493	479585	256283	367230
ENSGMOP00000014056	2	1	298.762	0.0265789	1.50018	Kontrol	2	pep:known_by_projection genescaffold:gadMor1:GeneScaffold_2134:229259:236538:-1 gene:ENSGMOG00000013141 transcript:ENSGMOT00000014419 gene_biotype:protein_coding transcript_biotype:protein_coding	1.36715e+06	1.04138e+06	1.17179e+06	768765	941040	949213	631003	862382	779144	1.79015e+06	826701	411836	726903	720386	542588	642019	629303	938246	742498	810734	750693	1.05726e+06	1.22923e+06	540988	745466	1.06412e+06	478298	549886
ENSGMOP00000004296	2	2	199.677	0.0128111	2.14316	2	Kontrol	pep:known_by_projection genescaffold:gadMor1:GeneScaffold_1790:316068:317708:1 gene:ENSGMOG00000004064 transcript:ENSGMOT00000004428 gene_biotype:protein_coding transcript_biotype:protein_coding	48514.8	22760.7	49496.1	23914.6	28391.5	17386.8	23711.8	43062.5	29646.6	20010.7	25373.9	54631.5	56091.7	117496	24594	60983	69424.1	78526	104834	75874.6	34767.5	37554.3	13059.7	67745.8	49580	47628	53451.1	49106.9
ENSGMOP00000000526	15	14	2075.16	0.0512234	1.17295	Kontrol	2	pep:known_by_projection genescaffold:gadMor1:GeneScaffold_1473:174222:182958:-1 gene:ENSGMOG00000000534 transcript:ENSGMOT00000000554 gene_biotype:protein_coding transcript_biotype:protein_coding	2.62895e+06	2.59387e+06	3.19134e+06	3.16416e+06	2.96363e+06	2.67254e+06	2.6353e+06	3.59189e+06	2.77176e+06	2.61384e+06	2.40393e+06	2.58467e+06	2.21173e+06	2.28912e+06	2.02785e+06	2.97837e+06	2.24428e+06	2.78623e+06	2.59286e+06	2.9534e+06	2.38826e+06	3.03952e+06	2.70389e+06	2.95809e+06	3.01097e+06	1.88831e+06	2.06289e+06	2.19804e+06
ENSGMOP00000020043	6	6	896.286	0.00360447	1.64702	Kontrol	2	pep:known_by_projection genescaffold:gadMor1:GeneScaffold_1074:28566:45345:-1 gene:ENSGMOG00000018648 transcript:ENSGMOT00000020537 gene_biotype:protein_coding transcript_biotype:protein_coding	6.25199e+06	4.69128e+06	1.04626e+07	6.23168e+06	6.72559e+06	3.69018e+06	5.34491e+06	8.11901e+06	6.65147e+06	3.80078e+06	4.32651e+06	3.633e+06	3.11656e+06	3.65502e+06	3.54707e+06	4.08027e+06	3.97621e+06	3.62618e+06	3.90179e+06	7.78656e+06	6.85057e+06	5.17535e+06	3.4501e+06	4.58699e+06	5.40598e+06	3.54298e+06	4.02741e+06	3.48452e+06
ENSGMOP00000009659	10	9	1392.28	0.0707792	1.16254	Kontrol	2	pep:known_by_projection genescaffold:gadMor1:GeneScaffold_1681:325826:332329:1 gene:ENSGMOG00000009047 transcript:ENSGMOT00000009919 gene_biotype:protein_coding transcript_biotype:protein_coding	2.00575e+06	2.53263e+06	2.72339e+06	2.43157e+06	2.25441e+06	2.44301e+06	2.00573e+06	2.66543e+06	1.96712e+06	2.94975e+06	1.8268e+06	1.78599e+06	1.87088e+06	2.01516e+06	2.11548e+06	2.522e+06	2.39424e+06	1.92586e+06	2.10721e+06	2.11194e+06	1.91462e+06	2.36808e+06	2.64173e+06	2.14008e+06	2.62793e+06	1.83289e+06	1.65256e+06	1.89869e+06
ENSGMOP00000016834	13	12	1987.96	0.0953488	1.10975	0,5	2	pep:known_by_projection genescaffold:gadMor1:GeneScaffold_1122:126860:140623:-1 gene:ENSGMOG00000015690 transcript:ENSGMOT00000017253 gene_biotype:protein_coding transcript_biotype:protein_coding	2.84524e+06	2.89819e+06	2.85127e+06	3.28936e+06	2.83568e+06	2.5516e+06	2.94165e+06	3.18237e+06	3.01266e+06	3.38017e+06	3.2041e+06	2.59149e+06	2.89841e+06	2.77616e+06	2.86497e+06	2.55333e+06	3.22653e+06	3.05121e+06	3.28609e+06	4.14154e+06	3.21138e+06	3.76404e+06	3.00509e+06	3.2143e+06	3.30026e+06	2.80345e+06	3.0652e+06	2.85019e+06
ENSGMOP00000010547	11	10	1572.58	0.176082	1.18439	Kontrol	0,5	pep:known_by_projection genescaffold:gadMor1:GeneScaffold_1032:9403:16481:1 gene:ENSGMOG00000009858 transcript:ENSGMOT00000010834 gene_biotype:protein_coding transcript_biotype:protein_coding	4.31294e+06	3.36992e+06	4.40278e+06	4.64792e+06	3.70268e+06	3.23698e+06	4.88068e+06	5.66514e+06	4.14754e+06	3.44912e+06	4.08363e+06	6.04254e+06	5.3285e+06	3.63364e+06	4.4849e+06	3.474e+06	3.58355e+06	3.11502e+06	3.15552e+06	3.24413e+06	4.41755e+06	2.72071e+06	2.87864e+06	3.2924e+06	2.58477e+06	4.16354e+06	3.97382e+06	4.49955e+06
ENSGMOP00000018241	11	10	1781.39	0.034598	1.20706	Kontrol	2	pep:known genescaffold:gadMor1:GeneScaffold_4578:292165:293975:-1 gene:ENSGMOG00000016982 transcript:ENSGMOT00000018689 gene_biotype:protein_coding transcript_biotype:protein_coding	7.45279e+06	7.06341e+06	9.05247e+06	1.13255e+07	8.80404e+06	9.91952e+06	8.49953e+06	9.71423e+06	1.13654e+07	9.58979e+06	6.97126e+06	8.17485e+06	6.51206e+06	7.33919e+06	6.52365e+06	6.61444e+06	8.64768e+06	9.05529e+06	9.34452e+06	1.03266e+07	8.05181e+06	7.54957e+06	6.96051e+06	9.68638e+06	8.66413e+06	7.04479e+06	6.86712e+06	8.40007e+06
ENSGMOP00000000914;ENSGMOP00000000974;ENSGMOP00000000992;ENSGMOP00000001012;ENSGMOP00000001024;ENSGMOP00000001059;ENSGMOP00000001076	2	2	300	0.113058	1.27106	Kontrol	2	pep:known_by_projection genescaffold:gadMor1:GeneScaffold_1352:52539:63508:-1 gene:ENSGMOG00000000802 transcript:ENSGMOT00000000949 gene_biotype:protein_coding transcript_biotype:protein_coding	391503	314839	766500	386383	309775	304337	362626	600156	302618	281246	299531	323621	285996	366404	336177	331781	349700	298739	254487	313424	295424	328015	259619	340653	332113	287888	358171	357320
ENSGMOP00000007316;ENSGMOP00000009983;ENSGMOP00000016943;ENSGMOP00000020594;ENSGMOP00000021338;ENSGMOP00000021475;ENSGMOP00000021739	9	9	1292.73	0.168102	1.12338	Kontrol	0,5	pep:known_by_projection genescaffold:gadMor1:GeneScaffold_678:134418:136987:-1 gene:ENSGMOG00000006889 transcript:ENSGMOT00000007524 gene_biotype:protein_coding transcript_biotype:protein_coding	1.4893e+07	1.46416e+07	1.41797e+07	1.37762e+07	1.22437e+07	1.45391e+07	1.26148e+07	1.50287e+07	1.32256e+07	2.18606e+07	1.23884e+07	1.17439e+07	1.25522e+07	1.33804e+07	1.301e+07	1.42341e+07	1.50925e+07	1.35803e+07	1.29599e+07	1.19331e+07	1.2149e+07	1.42163e+07	1.64567e+07	1.16194e+07	1.59538e+07	1.05955e+07	1.09692e+07	1.38794e+07
ENSGMOP00000020570	1	1	99.9399	0.106424	1.23562	2	0,5	pep:known_by_projection genescaffold:gadMor1:GeneScaffold_1441:935410:952948:1 gene:ENSGMOG00000019125 transcript:ENSGMOT00000021072 gene_biotype:protein_coding transcript_biotype:protein_coding	47621.9	40716.5	25188.1	42415.2	46137	39231.2	37032	38295.4	37255.4	29626.6	42672.4	27448	37184.5	51513.9	35839.9	50460.3	40878.5	41487.1	29513.3	34010.8	29810.3	26871.7	37248.7	43923.3	40634.2	16074.2	32402	27946.2
ENSGMOP00000002855	1	1	100	0.113232	1.32679	0,5	Kontrol	pep:known_by_projection genescaffold:gadMor1:GeneScaffold_1834:25438:35436:1 gene:ENSGMOG00000002698 transcript:ENSGMOT00000002946 gene_biotype:protein_coding transcript_biotype:protein_coding	11174	11779.9	3439.89	6350.75	8008.15	6476.52	9799.45	6732.77	7694.12	5517.22	5404.8	11493.6	9176.99	8068.65	13144.8	9316.57	5380.45	4635.22	2886.28	11340	13077.2	12673.1	7629.99	9496.96	6396.63	8660.29	11546.6	11093
ENSGMOP00000004203	3	2	298.332	0.0717919	1.28837	2	Kontrol	pep:known_by_projection genescaffold:gadMor1:GeneScaffold_3285:112701:134928:-1 gene:ENSGMOG00000003944 transcript:ENSGMOT00000004332 gene_biotype:protein_coding transcript_biotype:protein_coding	165185	131661	68596.1	136345	148292	125100	186936	135261	115884	64324.1	170911	242148	162507	139432	174813	156473	184658	134147	116316	142844	157493	165846	103581	159096	116966	159845	212799	177075
ENSGMOP00000002784	11	10	1292.87	0.204132	1.22869	0,5	Kontrol	pep:known_by_projection genescaffold:gadMor1:GeneScaffold_3298:933016:939692:1 gene:ENSGMOG00000002633 transcript:ENSGMOT00000002875 gene_biotype:protein_coding transcript_biotype:protein_coding	809589	1.37246e+06	1.00458e+06	1.26429e+06	1.07754e+06	1.07838e+06	1.24682e+06	1.09176e+06	1.91787e+06	1.14423e+06	1.97793e+06	942514	907235	1.58616e+06	927861	1.43367e+06	1.20966e+06	1.168e+06	1.36669e+06	1.48608e+06	1.73882e+06	1.18594e+06	1.31552e+06	1.26042e+06	2.2046e+06	958688	1.38775e+06	1.74034e+06
ENSGMOP00000011938	2	2	200	0.0544178	1.51083	Kontrol	2	pep:novel genescaffold:gadMor1:GeneScaffold_897:73558:95966:1 gene:ENSGMOG00000011165 transcript:ENSGMOT00000012259 gene_biotype:protein_coding transcript_biotype:protein_coding	95771.2	60676	87559.3	128495	62109.6	83434.2	52084.6	181793	85892.7	69094.6	56240.9	47230	38783	59048.5	40864.2	119514	55658.8	57434.7	65471.2	57226.7	63395.2	45303.7	77996.9	66396.4	50667.2	95124.9	109940	36725.3
ENSGMOP00000006011	13	12	1485.83	0.068297	1.26252	Kontrol	2	pep:known_by_projection genescaffold:gadMor1:GeneScaffold_293:324202:335872:1 gene:ENSGMOG00000005652 transcript:ENSGMOT00000006186 gene_biotype:protein_coding transcript_biotype:protein_coding	3.05606e+06	1.67568e+06	3.15917e+06	2.96871e+06	2.49351e+06	3.43383e+06	2.94401e+06	2.63771e+06	2.73961e+06	2.74936e+06	1.48738e+06	2.58169e+06	3.04894e+06	1.63212e+06	2.26635e+06	2.00814e+06	3.00664e+06	2.15284e+06	1.67452e+06	2.91779e+06	2.54719e+06	2.39174e+06	1.70132e+06	3.22469e+06	1.78942e+06	1.65218e+06	2.35365e+06	2.37627e+06
ENSGMOP00000006626	1	1	100	0.111641	1.28061	0,5	2	pep:known_by_projection genescaffold:gadMor1:GeneScaffold_389:769:33131:1 gene:ENSGMOG00000006243 transcript:ENSGMOT00000006819 gene_biotype:protein_coding transcript_biotype:protein_coding	77105.5	66652.4	61064.4	58804.2	55969.2	43980.5	53052.3	47830.5	61419.1	96435.5	38586.2	63391	26987.1	56252.1	50559.6	75703.5	75682.6	104709	67155.6	123900	67457.9	85478.4	94267.2	57404.5	57510.1	68214.7	79183.6	82477.7
ENSGMOP00000020947	3	3	483.482	0.00989362	1.25898	2	Kontrol	pep:known_by_projection genescaffold:gadMor1:GeneScaffold_3650:435949:451990:-1 gene:ENSGMOG00000019470 transcript:ENSGMOT00000021460 gene_biotype:protein_coding transcript_biotype:protein_coding	490726	528878	364400	457641	524581	408752	312856	453009	458096	447263	614507	526037	579239	628757	557328	532784	538923	591678	468658	384692	400693	408952	581184	520129	541944	680918	479124	561175
ENSGMOP00000014619	1	1	200	0.0590727	1.55796	Kontrol	2	pep:known_by_projection genescaffold:gadMor1:GeneScaffold_4267:3053:4129:-1 gene:ENSGMOG00000013686 transcript:ENSGMOT00000014995 gene_biotype:protein_coding transcript_biotype:protein_coding	1.86313e+06	2.9983e+06	3.83802e+06	2.24162e+06	1.79616e+06	2.27847e+06	2.96313e+06	3.17769e+06	2.64759e+06	7.31e+06	1.94766e+06	1.00498e+06	2.50104e+06	3.25629e+06	1.66269e+06	1.89073e+06	2.03418e+06	1.59319e+06	2.08318e+06	1.41247e+06	2.13608e+06	2.60523e+06	2.09271e+06	1.61295e+06	4.02485e+06	2.86506e+06	1.48068e+06	2.04228e+06
ENSGMOP00000012512	2	2	387.271	0.0642764	1.60826	Kontrol	2	pep:known_by_projection genescaffold:gadMor1:GeneScaffold_2117:186397:188950:-1 gene:ENSGMOG00000011703 transcript:ENSGMOT00000012842 gene_biotype:protein_coding transcript_biotype:protein_coding	75908.8	76559.7	173948	59295.4	52448.8	76698.3	75339.8	66017.2	59577.3	183195	75792.7	27291.8	58879.9	60666.3	61884.2	37332.9	56313.5	52069	72853.1	87316.7	46662.4	89790.6	103111	37479.6	71811	47235.4	38591.2	53220.8
ENSGMOP00000017469	10	9	1299.82	0.131261	1.27651	Kontrol	2	pep:known_by_projection genescaffold:gadMor1:GeneScaffold_3257:334032:340340:1 gene:ENSGMOG00000016285 transcript:ENSGMOT00000017900 gene_biotype:protein_coding transcript_biotype:protein_coding	1.79184e+06	1.92059e+06	2.4856e+06	3.64735e+06	1.89939e+06	1.41412e+06	3.30473e+06	2.73413e+06	3.1066e+06	3.07393e+06	1.76749e+06	1.55034e+06	1.87331e+06	1.80591e+06	1.63473e+06	1.83419e+06	2.49029e+06	2.32421e+06	2.6125e+06	3.10192e+06	1.60166e+06	2.16893e+06	1.60896e+06	1.68797e+06	1.96419e+06	1.58931e+06	1.94248e+06	2.6496e+06
ENSGMOP00000015401	4	2	497.54	0.210675	1.22936	Kontrol	0,5	pep:known_by_projection genescaffold:gadMor1:GeneScaffold_3530:190759:200453:-1 gene:ENSGMOG00000014401 transcript:ENSGMOT00000015796 gene_biotype:protein_coding transcript_biotype:protein_coding	363143	311752	487452	261383	251544	333821	208696	303361	223511	254177	307293	219694	261838	292925	332079	279134	292775	173647	156738	180724	215814	270676	283688	282635	371349	196100	167332	227097
ENSGMOP00000004658	7	4	699.211	0.0706102	1.38752	2	0,5	pep:known_by_projection genescaffold:gadMor1:GeneScaffold_1960:271226:273207:-1 gene:ENSGMOG00000004234 transcript:ENSGMOT00000004798 gene_biotype:protein_coding transcript_biotype:protein_coding	464242	693490	789252	858493	546052	679435	863835	1.11072e+06	540566	771385	941663	742485	730654	979853	986559	1.10669e+06	727629	361647	684872	561323	652161	566020	456787	659669	369497	525262	857278	585841
ENSGMOP00000011734	6	5	799.449	0.239027	1.18345	0,5	Kontrol	pep:known_by_projection genescaffold:gadMor1:GeneScaffold_3302:21310:35249:-1 gene:ENSGMOG00000010973 transcript:ENSGMOT00000012050 gene_biotype:protein_coding transcript_biotype:protein_coding	626217	776961	684234	912067	903723	871354	746959	979709	1.24087e+06	1.29749e+06	1.06563e+06	996138	784549	688956	832348	827794	1.00907e+06	1.21386e+06	1.28384e+06	1.32767e+06	927318	1.07692e+06	990372	1.36561e+06	792439	776894	1.2615e+06	1.10938e+06
ENSGMOP00000001236	16	15	2486.28	0.145342	1.13606	Kontrol	2	pep:known_by_projection genescaffold:gadMor1:GeneScaffold_2609:107:31200:-1 gene:ENSGMOG00000001194 transcript:ENSGMOT00000001282 gene_biotype:protein_coding transcript_biotype:protein_coding	4.70888e+06	5.12417e+06	5.41882e+06	6.88248e+06	6.18087e+06	4.95834e+06	5.0671e+06	6.30343e+06	6.28939e+06	4.7535e+06	5.68799e+06	5.2421e+06	5.47681e+06	5.68914e+06	3.61971e+06	4.12724e+06	5.00049e+06	4.37363e+06	4.8988e+06	6.14514e+06	5.00831e+06	4.86836e+06	3.57585e+06	5.01417e+06	5.89348e+06	3.72546e+06	4.90185e+06	5.29977e+06
ENSGMOP00000012868	5	5	699.677	0.0682486	1.28352	Kontrol	2	pep:known_by_projection genescaffold:gadMor1:GeneScaffold_229:139786:151354:1 gene:ENSGMOG00000012029 transcript:ENSGMOT00000013209 gene_biotype:protein_coding transcript_biotype:protein_coding	6.6684e+06	6.10596e+06	1.19139e+07	8.1489e+06	6.70809e+06	5.02434e+06	8.27491e+06	9.89521e+06	6.83377e+06	6.70518e+06	6.55194e+06	5.57264e+06	4.4974e+06	5.3544e+06	5.53135e+06	5.69155e+06	7.00712e+06	7.42464e+06	5.8551e+06	9.64097e+06	6.56277e+06	6.15318e+06	4.88328e+06	6.5831e+06	7.89109e+06	4.79512e+06	5.67752e+06	5.41425e+06
ENSGMOP00000007529	7	6	799.014	0.0821821	1.11833	2	0,5	pep:known_by_projection genescaffold:gadMor1:GeneScaffold_4258:252855:262322:1 gene:ENSGMOG00000007068 transcript:ENSGMOT00000007745 gene_biotype:protein_coding transcript_biotype:protein_coding	976594	910569	860447	1.06894e+06	894903	842481	903283	957152	920894	968738	808873	1.00586e+06	1.03833e+06	960016	846450	967637	1.02424e+06	1.15221e+06	846391	905729	848728	933042	852179	903816	891723	641299	767802	990425
ENSGMOP00000002212;ENSGMOP00000002232;ENSGMOP00000002238;ENSGMOP00000002253;ENSGMOP00000002262	1	1	100	0.19577	2.68997	0,5	Kontrol	pep:known_by_projection genescaffold:gadMor1:GeneScaffold_1270:24936:34727:1 gene:ENSGMOG00000002000 transcript:ENSGMOT00000002284 gene_biotype:protein_coding transcript_biotype:protein_coding	64446.6	68277.9	74261.7	41988.2	46007.4	104235	58357.7	50619.4	47605.2	46821.2	57870.5	50684.1	157319	53744.2	47074	133770	46785.8	37224.6	43211.8	49998.9	75447.8	74136.5	711488	230500	45084.7	32369	178401	61500.2
ENSGMOP00000016767	3	3	299.4	0.174586	1.11288	Kontrol	2	pep:known_by_projection genescaffold:gadMor1:GeneScaffold_733:516063:528337:1 gene:ENSGMOG00000015627 transcript:ENSGMOT00000017186 gene_biotype:protein_coding transcript_biotype:protein_coding	233520	246300	331447	260913	278188	248013	238181	286316	241486	265206	293158	264852	226544	206998	190940	225748	266280	223169	228874	278059	234654	301857	255501	208351	280670	177659	180481	214052
ENSGMOP00000005042	2	1	396.861	0.227451	1.20687	0,5	Kontrol	pep:known_by_projection genescaffold:gadMor1:GeneScaffold_1722:238017:238887:-1 gene:ENSGMOG00000004756 transcript:ENSGMOT00000005189 gene_biotype:protein_coding transcript_biotype:protein_coding	264912	348865	166233	292433	279402	380527	389489	185383	300583	428616	341087	495615	335185	294839	307680	306718	402605	282160	315120	461949	268834	389621	491900	308898	272312	443586	258917	402112
ENSGMOP00000007970	1	1	100	0.0118542	1.31808	Kontrol	2	pep:known_by_projection genescaffold:gadMor1:GeneScaffold_4201:253869:255354:1 gene:ENSGMOG00000007455 transcript:ENSGMOT00000008200 gene_biotype:protein_coding transcript_biotype:protein_coding	38377.7	27417.1	45413.2	33068	30109.6	35942.1	26110.2	46129.9	38519.7	31708	27143.1	24646.4	22275.5	25407.1	32406.5	36344.6	29808.9	16948.3	25911.5	32740.9	32796.7	24642.1	29462.3	33661.2	24179.7	27774.8	33299.8	33081.3
ENSGMOP00000008873	11	7	1765.62	0.19853	1.12686	Kontrol	0,5	pep:known_by_projection genescaffold:gadMor1:GeneScaffold_2603:609608:615906:1 gene:ENSGMOG00000008292 transcript:ENSGMOT00000009118 gene_biotype:protein_coding transcript_biotype:protein_coding	4.12415e+06	4.70293e+06	5.28341e+06	6.10597e+06	4.66286e+06	5.18966e+06	6.2842e+06	6.2369e+06	5.13555e+06	5.79292e+06	5.36164e+06	3.77268e+06	5.79852e+06	5.67185e+06	4.56889e+06	5.24182e+06	5.39225e+06	6.90264e+06	5.13606e+06	5.23936e+06	5.6351e+06	5.46841e+06	4.26788e+06	4.85216e+06	3.94076e+06	3.43697e+06	4.9128e+06	4.99087e+06
ENSGMOP00000016005	1	1	100	0.0944375	2.48309	2	Kontrol	pep:known_by_projection genescaffold:gadMor1:GeneScaffold_1698:64211:74159:1 gene:ENSGMOG00000014943 transcript:ENSGMOT00000016414 gene_biotype:protein_coding transcript_biotype:protein_coding	14622.6	15195.4	8629.03	274.929	21718.9	228.105	9258.7	3361.58	1058.18	7916.66	940.547	6799.24	29254.1	28065.1	24993.5	26901	13692.4	34430.7	18765.7	1124.6	12439.3	3368.43	17177.8	32757.2	17169.1	20055.3	42505.2	6480.9
ENSGMOP00000007282	5	5	786.852	0.00379618	1.57886	2	Kontrol	pep:known_by_projection genescaffold:gadMor1:GeneScaffold_25:320932:329885:-1 gene:ENSGMOG00000006848 transcript:ENSGMOT00000007489 gene_biotype:protein_coding transcript_biotype:protein_coding	1.97938e+06	2.62745e+06	1.88543e+06	2.41092e+06	2.07856e+06	2.23223e+06	2.51734e+06	2.0425e+06	3.02181e+06	2.08145e+06	4.34654e+06	5.01884e+06	4.99942e+06	3.39689e+06	3.38232e+06	2.01476e+06	3.22273e+06	3.02359e+06	3.10263e+06	2.14341e+06	2.34096e+06	2.34141e+06	2.00179e+06	2.52972e+06	2.45306e+06	4.85258e+06	3.20963e+06	4.00031e+06
ENSGMOP00000014309	2	2	296.893	0.19629	1.19994	Kontrol	0,5	pep:known_by_projection genescaffold:gadMor1:GeneScaffold_2393:103062:107732:1 gene:ENSGMOG00000013385 transcript:ENSGMOT00000014679 gene_biotype:protein_coding transcript_biotype:protein_coding	282387	240194	417556	221913	247048	190982	251747	356668	189421	227943	152298	184574	215727	263595	222597	248538	248014	247342	206275	171790	232449	132328	183735	245887	280094	260089	226074	237038
ENSGMOP00000004873	13	11	1598.14	0.0210551	1.27033	Kontrol	2	pep:known_by_projection genescaffold:gadMor1:GeneScaffold_2638:248763:255361:1 gene:ENSGMOG00000004593 transcript:ENSGMOT00000005014 gene_biotype:protein_coding transcript_biotype:protein_coding	2.38152e+06	2.70054e+06	2.22708e+06	2.89207e+06	2.7064e+06	2.93911e+06	3.20075e+06	3.32714e+06	3.36353e+06	2.8539e+06	1.8843e+06	2.27214e+06	1.86858e+06	2.38748e+06	1.86209e+06	2.17011e+06	2.78669e+06	2.71232e+06	2.31311e+06	3.30623e+06	3.12878e+06	2.68757e+06	2.25386e+06	2.24023e+06	1.58723e+06	2.15008e+06	2.41035e+06	3.01322e+06
ENSGMOP00000013217	1	1	100	0.0698413	1.61536	0,5	2	pep:known_by_projection genescaffold:gadMor1:GeneScaffold_52:39734:46276:1 gene:ENSGMOG00000012346 transcript:ENSGMOT00000013568 gene_biotype:protein_coding transcript_biotype:protein_coding	15964.5	15441.1	29905.1	29937.8	21992.3	27008.2	24199.4	21160.3	28582.9	18044.8	26775.2	9552.89	12143.4	20875.3	21311.6	25700.5	42353.8	17691.8	15921	35218.9	22280.9	24229.7	13950.4	38554.5	33958.1	70337.2	20275.5	51869.1
ENSGMOP00000004244	6	6	898.32	0.259445	1.63539	Kontrol	0,5	pep:known_by_projection genescaffold:gadMor1:GeneScaffold_1290:56710:57739:1 gene:ENSGMOG00000004016 transcript:ENSGMOT00000004375 gene_biotype:protein_coding transcript_biotype:protein_coding	2.51277e+06	396803	615467	679592	551568	420565	614209	637352	342680	1.02648e+06	403209	348199	320968	354789	693301	796804	891667	811165	509338	491017	408323	627582	348502	436955	631946	346925	484696	515218
ENSGMOP00000013669	3	2	300	0.0217366	1.99729	Kontrol	2	pep:known_by_projection genescaffold:gadMor1:GeneScaffold_39:191:64072:1 gene:ENSGMOG00000012768 transcript:ENSGMOT00000014030 gene_biotype:protein_coding transcript_biotype:protein_coding	419060	235966	855164	300516	368856	167355	209598	662463	298354	195720	211630	197697	146806	195392	217805	196448	182974	162203	162186	342862	452026	242698	138853	240224	401498	183463	197524	133250
ENSGMOP00000001484;ENSGMOP00000005683;ENSGMOP00000012126;ENSGMOP00000013330	13	3	2092.65	0.00544493	1.65871	Kontrol	2	pep:known genescaffold:gadMor1:GeneScaffold_1426:16542:22086:1 gene:ENSGMOG00000001421 transcript:ENSGMOT00000001537 gene_biotype:protein_coding transcript_biotype:protein_coding	1.97723e+07	1.60813e+07	3.28738e+07	1.59226e+07	1.98295e+07	1.15663e+07	1.33845e+07	2.22499e+07	1.46128e+07	1.3638e+07	1.30702e+07	1.06329e+07	8.08776e+06	9.94437e+06	1.07653e+07	1.36006e+07	1.10959e+07	1.0926e+07	9.5058e+06	1.62978e+07	1.77841e+07	1.79818e+07	1.66961e+07	1.49743e+07	2.1471e+07	8.13273e+06	9.05558e+06	9.39298e+06
ENSGMOP00000010960	1	1	100	0.277634	1.16531	Kontrol	0,5	pep:known_by_projection genescaffold:gadMor1:GeneScaffold_3719:518553:522110:-1 gene:ENSGMOG00000010241 transcript:ENSGMOT00000011258 gene_biotype:protein_coding transcript_biotype:protein_coding	119143	130134	172018	150076	99907.6	142624	133435	186331	128713	161578	101063	94536.4	134463	174971	106534	136283	130208	160346	115284	74095.9	120195	111327	153850	125493	168500	69141.7	151929	125229
ENSGMOP00000000791	17	15	2597.58	0.281481	1.17854	Kontrol	0,5	pep:known_by_projection genescaffold:gadMor1:GeneScaffold_3014:5721:31733:1 gene:ENSGMOG00000000752 transcript:ENSGMOT00000000824 gene_biotype:protein_coding transcript_biotype:protein_coding	3.61823e+06	2.91381e+06	4.00328e+06	4.68667e+06	3.54756e+06	4.31637e+06	4.79817e+06	5.18892e+06	4.48606e+06	3.09573e+06	2.71887e+06	3.68197e+06	2.85774e+06	3.93743e+06	4.09429e+06	3.48378e+06	4.46396e+06	3.63724e+06	2.69446e+06	5.10197e+06	2.59461e+06	4.26621e+06	2.67955e+06	4.96856e+06	4.63238e+06	3.42753e+06	1.00088e+06	2.3746e+06
ENSGMOP00000015231	1	1	100	0.000951534	2.23373	Kontrol	2	pep:novel genescaffold:gadMor1:GeneScaffold_251:12025:18085:-1 gene:ENSGMOG00000014255 transcript:ENSGMOT00000015622 gene_biotype:protein_coding transcript_biotype:protein_coding	296845	222549	334498	257445	321583	144810	280776	404783	297574	116374	75937.1	145708	94069.8	133985	130435	111896	132293	120154	134220	287054	397683	256535	77171.2	238252	215608	155053	152340	113648
ENSGMOP00000020548	2	1	299.1	0.0792952	1.26228	2	Kontrol	pep:known genescaffold:gadMor1:GeneScaffold_2324:353867:354265:-1 gene:ENSGMOG00000019105 transcript:ENSGMOT00000021050 gene_biotype:protein_coding transcript_biotype:protein_coding	366051	368421	295186	329979	289621	424305	372037	300393	352662	666379	610364	374556	454373	451086	615772	375160	536892	454659	404417	518401	333507	373332	723578	349173	490102	349497	377766	523068
ENSGMOP00000004759	1	1	99.9911	0.136685	1.12559	2	0,5	pep:known_by_projection genescaffold:gadMor1:GeneScaffold_1239:436:12986:1 gene:ENSGMOG00000004484 transcript:ENSGMOT00000004900 gene_biotype:protein_coding transcript_biotype:protein_coding	340308	254481	279964	239641	286185	265199	277402	247117	212565	240817	270579	302564	259494	259623	290436	283058	262995	246772	253999	202769	279883	288436	270646	234550	234114	146992	240753	260292
ENSGMOP00000008290;ENSGMOP00000009929	5	4	700	0.287793	1.25925	0,5	Kontrol	pep:known_by_projection genescaffold:gadMor1:GeneScaffold_168:432339:435553:-1 gene:ENSGMOG00000007753 transcript:ENSGMOT00000008525 gene_biotype:protein_coding transcript_biotype:protein_coding	275008	177595	87065.5	187896	192081	303735	209708	137768	163670	91999.8	168380	232447	386234	224447	240573	258198	146733	146150	113010	153540	185264	197141	151498	284519	243607	352873	257723	243878
ENSGMOP00000015750	5	4	599.076	0.00357455	1.42233	2	Kontrol	pep:known_by_projection genescaffold:gadMor1:GeneScaffold_871:3797:36374:1 gene:ENSGMOG00000014688 transcript:ENSGMOT00000016153 gene_biotype:protein_coding transcript_biotype:protein_coding	610042	684896	405863	699859	684773	684779	501699	530306	419841	464604	869290	773982	691076	671457	992491	1.07231e+06	759060	725137	724695	446719	556366	781851	1.03234e+06	640811	647899	557720	606144	724801
ENSGMOP00000013106	20	17	2860.31	0.0198583	1.09785	2	Kontrol	pep:known_by_projection genescaffold:gadMor1:GeneScaffold_1919:18295:24480:1 gene:ENSGMOG00000012246 transcript:ENSGMOT00000013455 gene_biotype:protein_coding transcript_biotype:protein_coding	7.5006e+06	7.28244e+06	7.45223e+06	8.01323e+06	7.3439e+06	6.71749e+06	6.50273e+06	8.0146e+06	6.97172e+06	6.67519e+06	7.8118e+06	7.56551e+06	7.18329e+06	8.04479e+06	7.91173e+06	8.60404e+06	8.07219e+06	8.87026e+06	7.54552e+06	8.33877e+06	7.52451e+06	7.55101e+06	7.73218e+06	7.29578e+06	8.35654e+06	7.29791e+06	6.89431e+06	7.47679e+06
ENSGMOP00000016690	5	3	590.797	0.27984	1.1468	Kontrol	0,5	pep:known_by_projection genescaffold:gadMor1:GeneScaffold_4179:124729:125387:1 gene:ENSGMOG00000015577 transcript:ENSGMOT00000017109 gene_biotype:protein_coding transcript_biotype:protein_coding	6.14963e+06	4.39131e+06	5.15211e+06	4.72713e+06	5.4293e+06	3.96889e+06	3.70486e+06	7.49343e+06	4.81887e+06	4.11141e+06	4.34141e+06	4.00604e+06	3.85843e+06	5.7771e+06	4.4573e+06	5.03415e+06	4.10592e+06	4.34031e+06	4.35231e+06	4.06324e+06	5.28802e+06	4.1255e+06	4.31464e+06	4.46925e+06	5.97191e+06	4.11883e+06	3.82584e+06	3.02086e+06
ENSGMOP00000010970	13	12	2097.77	0.106904	1.1853	0,5	2	pep:known_by_projection genescaffold:gadMor1:GeneScaffold_2190:216501:347742:1 gene:ENSGMOG00000010242 transcript:ENSGMOT00000011268 gene_biotype:protein_coding transcript_biotype:protein_coding	2.57799e+06	2.82503e+06	3.4483e+06	2.81723e+06	2.11931e+06	3.46284e+06	2.50673e+06	2.65695e+06	2.67209e+06	3.4388e+06	2.77497e+06	2.33001e+06	3.02597e+06	2.55592e+06	2.51258e+06	2.77609e+06	2.75676e+06	2.56555e+06	3.05291e+06	3.44516e+06	3.21267e+06	2.66486e+06	3.61669e+06	3.44648e+06	2.11107e+06	4.14367e+06	3.33722e+06	2.88521e+06
ENSGMOP00000021750	1	1	198.332	0.00631178	1.42518	Kontrol	2	pep:known_by_projection contig::contig293571:5:661:1 gene:ENSGMOG00000020263 transcript:ENSGMOT00000022268 gene_biotype:protein_coding transcript_biotype:protein_coding	53856.1	72473.9	109017	83550.6	75748.4	87390.4	64831.2	103446	101744	95563	61041.8	40193.6	78491.7	55709.3	43085.3	58059.9	87564.3	54493.7	56632.6	71192.3	89637.4	76388.2	67500.1	68410.1	92470.8	54174.1	71182.2	54613.7
ENSGMOP00000008328;ENSGMOP00000008332	3	3	398.492	0.175523	1.21529	Kontrol	2	pep:known_by_projection genescaffold:gadMor1:GeneScaffold_4029:406471:411850:-1 gene:ENSGMOG00000007792 transcript:ENSGMOT00000008563 gene_biotype:protein_coding transcript_biotype:protein_coding	582572	481560	457425	633046	758390	604899	783160	801511	635712	416148	493488	531072	696432	424097	613547	537523	459258	428138	374179	379341	683834	474850	317596	583078	496527	433521	760596	590881
ENSGMOP00000000658	2	2	200	0.185084	1.19781	Kontrol	2	pep:known_by_projection genescaffold:gadMor1:GeneScaffold_3192:39825:42832:-1 gene:ENSGMOG00000000657 transcript:ENSGMOT00000000689 gene_biotype:protein_coding transcript_biotype:protein_coding	807280	556576	791496	807234	537988	476151	499892	579564	744071	654770	649431	518320	580863	590770	510552	483084	420629	574108	522367	828831	670349	722014	402001	408851	669159	527321	408556	423994
ENSGMOP00000014129	9	9	1289.51	0.15781	1.2779	Kontrol	2	pep:known_by_projection genescaffold:gadMor1:GeneScaffold_3668:128:20371:-1 gene:ENSGMOG00000013214 transcript:ENSGMOT00000014494 gene_biotype:protein_coding transcript_biotype:protein_coding	2.21698e+06	2.79251e+06	3.17568e+06	2.13259e+06	1.92374e+06	2.59741e+06	1.90109e+06	1.95579e+06	1.68935e+06	4.20711e+06	1.96907e+06	1.38917e+06	1.85036e+06	2.29126e+06	1.60482e+06	2.06397e+06	2.10761e+06	1.67774e+06	2.36579e+06	1.68314e+06	1.39729e+06	2.37779e+06	3.79055e+06	1.69749e+06	1.74477e+06	2.34951e+06	1.98272e+06	1.4878e+06
ENSGMOP00000013447	7	6	899.383	0.296008	1.10179	Kontrol	0,5	pep:known_by_projection genescaffold:gadMor1:GeneScaffold_4004:4873:49507:1 gene:ENSGMOG00000012568 transcript:ENSGMOT00000013803 gene_biotype:protein_coding transcript_biotype:protein_coding	1.46843e+06	1.5085e+06	1.58076e+06	1.46804e+06	1.40093e+06	1.24695e+06	1.25707e+06	1.66126e+06	1.24929e+06	1.40094e+06	1.50203e+06	942502	1.53255e+06	1.41022e+06	1.22957e+06	1.20457e+06	1.13897e+06	1.65728e+06	1.46588e+06	1.41656e+06	1.34235e+06	1.45869e+06	1.3392e+06	1.1858e+06	1.32848e+06	932981	1.35129e+06	1.27844e+06
ENSGMOP00000020138	10	8	1297.38	0.0211542	1.26879	Kontrol	2	pep:known_by_projection genescaffold:gadMor1:GeneScaffold_120:75783:79483:1 gene:ENSGMOG00000018752 transcript:ENSGMOT00000020636 gene_biotype:protein_coding transcript_biotype:protein_coding	4.26185e+06	4.17145e+06	5.65249e+06	5.33297e+06	4.13779e+06	4.72551e+06	5.77066e+06	5.19278e+06	5.86745e+06	7.17358e+06	3.65888e+06	4.167e+06	3.48266e+06	3.93453e+06	4.13411e+06	3.59812e+06	5.63429e+06	4.06151e+06	4.41773e+06	6.23989e+06	4.95769e+06	3.86422e+06	4.89175e+06	5.08813e+06	4.36248e+06	3.33341e+06	4.14375e+06	4.90397e+06
ENSGMOP00000003272	3	3	398.416	0.278443	1.36307	0,5	Kontrol	pep:known_by_projection genescaffold:gadMor1:GeneScaffold_2878:178198:180680:1 gene:ENSGMOG00000003113 transcript:ENSGMOT00000003373 gene_biotype:protein_coding transcript_biotype:protein_coding	165837	86328.8	53679.5	84667.6	124301	83174.5	118175	55122.1	91642.3	78178.1	70386.8	96532.6	153143	113476	152562	136480	79731.2	106476	118344	53373.8	120858	97162.6	73229.5	160437	91974.6	205278	238052	114152
ENSGMOP00000000867	2	1	198.998	0.255669	1.11114	0,5	Kontrol	pep:known_by_projection genescaffold:gadMor1:GeneScaffold_3683:97444:99434:1 gene:ENSGMOG00000000847 transcript:ENSGMOT00000000902 gene_biotype:protein_coding transcript_biotype:protein_coding	27124.5	22899.4	19022.3	18629.5	22329.1	17374.7	26123	19698	15764.1	14815.3	25164	25457.5	20005.7	23377.9	23729.2	23507.2	24561.6	16335.6	19908.1	23393.3	24210.4	22732.4	16184.6	25590.9	23400.1	22019.4	25224.9	21029
ENSGMOP00000002277	3	2	399.569	0.29963	1.11226	0,5	Kontrol	pep:known_by_projection genescaffold:gadMor1:GeneScaffold_3844:3299:3963:-1 gene:ENSGMOG00000002142 transcript:ENSGMOT00000002352 gene_biotype:protein_coding transcript_biotype:protein_coding	343502	502408	309649	513746	484318	355431	412249	436938	447272	431469	619961	359647	450745	481724	394295	392956	417348	378150	400512	441487	511498	481137	468529	452878	574751	514925	448494	347671
ENSGMOP00000013477	19	16	2584.98	0.0694429	1.12976	Kontrol	2	pep:known_by_projection genescaffold:gadMor1:GeneScaffold_3698:815:23787:1 gene:ENSGMOG00000012599 transcript:ENSGMOT00000013833 gene_biotype:protein_coding transcript_biotype:protein_coding	7.14697e+06	5.78253e+06	6.4717e+06	7.61412e+06	6.54307e+06	6.02449e+06	6.71503e+06	8.29232e+06	6.5564e+06	5.48173e+06	5.5031e+06	7.31933e+06	5.42421e+06	5.18401e+06	5.60617e+06	5.57922e+06	6.14371e+06	6.64358e+06	5.67479e+06	6.98877e+06	6.1471e+06	6.67561e+06	5.43421e+06	5.83464e+06	6.68531e+06	6.23531e+06	5.6084e+06	5.76985e+06
ENSGMOP00000019542	8	7	1396.63	0.261534	1.10525	Kontrol	2	pep:known_by_projection genescaffold:gadMor1:GeneScaffold_3076:328:61699:1 gene:ENSGMOG00000018166 transcript:ENSGMOT00000020019 gene_biotype:protein_coding transcript_biotype:protein_coding	6.98563e+06	7.1456e+06	5.22677e+06	6.43883e+06	6.14826e+06	5.99949e+06	5.64459e+06	6.90756e+06	4.92368e+06	5.89178e+06	4.59264e+06	5.393e+06	5.4666e+06	5.36146e+06	5.36361e+06	6.70608e+06	6.33323e+06	5.18294e+06	5.52649e+06	4.75591e+06	6.53108e+06	6.33249e+06	6.76428e+06	6.93108e+06	3.94121e+06	4.02223e+06	5.31262e+06	5.58177e+06
ENSGMOP00000008212	2	2	199.88	0.252517	1.1368	0,5	Kontrol	pep:known_by_projection genescaffold:gadMor1:GeneScaffold_4654:60873:63031:-1 gene:ENSGMOG00000007678 transcript:ENSGMOT00000008446 gene_biotype:protein_coding transcript_biotype:protein_coding	349502	355192	352302	349698	366738	294962	376638	318329	383392	239031	414672	553191	325091	362208	424131	352085	319322	324448	354666	407652	368132	344234	317936	307740	321016	571052	429758	396533
ENSGMOP00000014465	4	4	499.595	0.308562	1.1289	0,5	Kontrol	pep:known_by_projection genescaffold:gadMor1:GeneScaffold_1112:449811:455418:-1 gene:ENSGMOG00000013534 transcript:ENSGMOT00000014839 gene_biotype:protein_coding transcript_biotype:protein_coding	414566	511590	425104	456792	483739	595074	801979	486447	467446	342118	485281	899456	498824	402146	624331	501864	667856	409816	518048	632353	604446	556828	541266	576533	499015	638268	514813	501143
ENSGMOP00000019718	2	2	199.832	0.0019302	1.67501	Kontrol	2	pep:known_by_projection genescaffold:gadMor1:GeneScaffold_2847:45025:48319:1 gene:ENSGMOG00000018322 transcript:ENSGMOT00000020197 gene_biotype:protein_coding transcript_biotype:protein_coding	117309	110455	270742	170305	160012	112554	194969	235999	181793	114074	98598.8	79170.3	77242.4	136166	89684.7	93830.9	83064.6	105443	133146	176520	158500	146241	84239.2	157455	154093	112539	114180	115636
ENSGMOP00000008247	4	4	400	0.0414334	1.78991	Kontrol	2	pep:known_by_projection genescaffold:gadMor1:GeneScaffold_4013:40283:46023:-1 gene:ENSGMOG00000007711 transcript:ENSGMOT00000008481 gene_biotype:protein_coding transcript_biotype:protein_coding	374269	268744	618419	299566	218089	318833	140769	382237	210872	644261	281245	91577.2	175738	201277	158837	173933	229531	240719	194966	184328	278232	286965	490305	234005	299303	287182	104029	141999
ENSGMOP00000014544	16	5	2494.29	0.212365	1.18547	2	0,5	pep:known_by_projection genescaffold:gadMor1:GeneScaffold_2358:12875:68289:1 gene:ENSGMOG00000013597 transcript:ENSGMOT00000014918 gene_biotype:protein_coding transcript_biotype:protein_coding	1.13048e+06	1.11206e+06	955951	737329	824104	750465	785909	768785	603928	1.26159e+06	1.06235e+06	652258	889976	1.09761e+06	1.14829e+06	799426	749969	1.02473e+06	739730	679738	748838	973574	1.24374e+06	715329	865915	464335	572352	623167
ENSGMOP00000016344	7	2	798.559	0.157153	1.2339	Kontrol	2	pep:known_by_projection genescaffold:gadMor1:GeneScaffold_2483:14176:19669:1 gene:ENSGMOG00000015260 transcript:ENSGMOT00000016760 gene_biotype:protein_coding transcript_biotype:protein_coding	157806	176889	291351	264018	190464	187043	153344	204702	156085	188945	127502	189435	126462	98994.6	183553	186813	180465	126997	217158	210227	147715	274910	129954	146008	146271	110653	146516	199423
ENSGMOP00000016995	1	1	100	0.194558	1.20241	2	0,5	pep:known_by_projection genescaffold:gadMor1:GeneScaffold_3937:34734:69375:-1 gene:ENSGMOG00000015843 transcript:ENSGMOT00000017418 gene_biotype:protein_coding transcript_biotype:protein_coding	38474.4	48602	61067.5	36196.8	55282.1	48172.5	60259.1	32614.8	41764.1	40302.5	33524.9	64576.8	36868.9	45407.4	51247.5	48319.8	59555.6	51339.4	39488.2	44708.9	25934.8	37972.2	31002.9	48128.9	34289.1	23067.1	51389.2	61395.2
ENSGMOP00000008391	9	6	1299.84	0.123123	1.13258	Kontrol	2	pep:known_by_projection genescaffold:gadMor1:GeneScaffold_671:13945:16674:1 gene:ENSGMOG00000007850 transcript:ENSGMOT00000008629 gene_biotype:protein_coding transcript_biotype:protein_coding	3.59125e+06	4.14794e+06	4.17357e+06	4.46451e+06	4.33952e+06	4.1378e+06	4.39139e+06	4.557e+06	4.52577e+06	4.14725e+06	3.71297e+06	3.78341e+06	3.82766e+06	3.90214e+06	3.48523e+06	3.66043e+06	3.68107e+06	4.11501e+06	3.5855e+06	4.80784e+06	4.37605e+06	3.97363e+06	2.9727e+06	4.29914e+06	4.17054e+06	2.47746e+06	4.39601e+06	4.05299e+06
ENSGMOP00000009495	3	2	394.01	0.0204467	1.24713	Kontrol	2	pep:known_by_projection genescaffold:gadMor1:GeneScaffold_1681:166763:167523:-1 gene:ENSGMOG00000008888 transcript:ENSGMOT00000009751 gene_biotype:protein_coding transcript_biotype:protein_coding	473060	453161	565592	451114	422579	560004	510061	489764	429616	585725	443661	547947	330861	316149	449573	495954	342419	313058	325865	547136	495227	490427	489067	471561	334754	378702	387750	385355
ENSGMOP00000001492	5	5	692.738	0.026622	1.28078	Kontrol	2	pep:known_by_projection genescaffold:gadMor1:GeneScaffold_525:2183:6655:1 gene:ENSGMOG00000001427 transcript:ENSGMOT00000001546 gene_biotype:protein_coding transcript_biotype:protein_coding	5.09181e+06	4.64577e+06	7.43746e+06	5.0353e+06	5.14441e+06	4.32417e+06	3.81771e+06	5.26737e+06	3.92521e+06	3.66909e+06	3.52476e+06	3.46608e+06	3.49277e+06	3.52589e+06	4.73842e+06	4.67595e+06	4.29287e+06	3.03452e+06	3.23003e+06	4.32462e+06	4.80261e+06	5.22458e+06	5.2226e+06	3.5253e+06	3.82929e+06	4.02844e+06	3.86136e+06	3.36471e+06
ENSGMOP00000001246	3	3	400	0.0060115	1.61479	2	Kontrol	pep:known_by_projection genescaffold:gadMor1:GeneScaffold_743:52092:58238:-1 gene:ENSGMOG00000001195 transcript:ENSGMOT00000001292 gene_biotype:protein_coding transcript_biotype:protein_coding	432766	514277	272830	537992	535000	429258	534393	361489	474628	302564	783226	996163	749492	671195	621126	533800	666024	771545	595025	511064	341826	460705	337013	375242	448565	853224	687470	1.13419e+06
ENSGMOP00000002336	1	1	200	0.128441	1.15731	Kontrol	2	pep:known_by_projection genescaffold:gadMor1:GeneScaffold_1165:102:5601:1 gene:ENSGMOG00000002189 transcript:ENSGMOT00000002414 gene_biotype:protein_coding transcript_biotype:protein_coding	68699	51869.6	55418.4	65110.5	48490.7	63758.9	60561.5	77208.7	70217	62633.8	45746.3	42679.8	59568.9	53149.8	53353.2	51256.5	55155.2	56643.3	67686	56850.4	63675.7	52732.6	67118.7	68393.2	54413.6	36686.4	55128.8	52966.9
ENSGMOP00000013859	1	1	100	0.000983356	2.07933	2	Kontrol	pep:known_by_projection genescaffold:gadMor1:GeneScaffold_2247:138747:169605:1 gene:ENSGMOG00000012935 transcript:ENSGMOT00000014221 gene_biotype:protein_coding transcript_biotype:protein_coding	5274.21	5641.34	2589.32	3971.42	6023.8	3273.53	4609.43	3478.24	3427.22	2309.05	7070.67	5026.61	9808.53	11885.7	8474.97	9502.36	6644.34	9635.12	7926.05	2132.89	5089.15	3516	5027.02	6453.3	6410.75	10807.9	8570.85	2777.15
ENSGMOP00000004353	1	1	197.54	0.337477	1.27388	Kontrol	0,5	pep:known_by_projection genescaffold:gadMor1:GeneScaffold_1856:197:21954:-1 gene:ENSGMOG00000004068 transcript:ENSGMOT00000004486 gene_biotype:protein_coding transcript_biotype:protein_coding	104940	158770	119097	79339.7	164956	112976	181330	175528	51939.2	129334	24038.8	75614.6	159153	151540	138558	131415	144452	134071	115635	17447.4	89153.1	22674.5	124006	201671	126255	61561.5	158700	101592
ENSGMOP00000017429	14	14	2196.04	0.202828	1.11833	2	Kontrol	pep:known_by_projection genescaffold:gadMor1:GeneScaffold_1780:1248737:1252820:-1 gene:ENSGMOG00000016248 transcript:ENSGMOT00000017859 gene_biotype:protein_coding transcript_biotype:protein_coding	7.84659e+06	7.2907e+06	8.29837e+06	9.08464e+06	8.76753e+06	8.44782e+06	9.92685e+06	1.0368e+07	8.15379e+06	6.0162e+06	9.49745e+06	8.86428e+06	9.19368e+06	7.54052e+06	1.01593e+07	9.35688e+06	1.09396e+07	9.15228e+06	1.00437e+07	9.4757e+06	1.08428e+07	8.3692e+06	7.42318e+06	1.023e+07	7.14474e+06	1.07842e+07	1.21242e+07	8.0174e+06
ENSGMOP00000016645	1	1	200	0.181056	1.26794	2	0,5	pep:novel genescaffold:gadMor1:GeneScaffold_1262:379845:382519:1 gene:ENSGMOG00000015535 transcript:ENSGMOT00000017063 gene_biotype:protein_coding transcript_biotype:protein_coding	124204	105737	170503	68150.7	140025	96933.2	130376	126405	65155.7	120548	64780.5	155037	116145	112742	126674	97941.3	139276	127430	139388	55522.3	112931	48902.6	147296	107650	98818.5	64992.8	89426.8	125774
ENSGMOP00000008488	1	1	300	0.245102	1.1595	2	0,5	pep:known_by_projection genescaffold:gadMor1:GeneScaffold_3983:16032:17957:1 gene:ENSGMOG00000007943 transcript:ENSGMOT00000008727 gene_biotype:protein_coding transcript_biotype:protein_coding	331954	539808	267580	312909	431337	372221	373545	429611	252762	321020	293949	268044	412486	438719	370000	414218	402118	360785	319835	145331	236098	218042	501598	436040	426966	148691	419731	296449
ENSGMOP00000019949	6	5	699.076	0.203869	1.26276	Kontrol	2	pep:known_by_projection genescaffold:gadMor1:GeneScaffold_316:72323:77224:-1 gene:ENSGMOG00000018546 transcript:ENSGMOT00000020437 gene_biotype:protein_coding transcript_biotype:protein_coding	1.03517e+06	937615	2.6823e+06	944684	947009	858862	790148	924250	1.01088e+06	1.13649e+06	987731	853358	873728	882015	825255	902405	925152	931521	849389	1.06446e+06	964318	941798	852475	758243	967975	889449	801327	990105
ENSGMOP00000015378	7	6	1198.33	0.253854	1.106	0,5	Kontrol	pep:known_by_projection genescaffold:gadMor1:GeneScaffold_3651:76415:86835:-1 gene:ENSGMOG00000014382 transcript:ENSGMOT00000015772 gene_biotype:protein_coding transcript_biotype:protein_coding	2.36609e+06	2.24275e+06	1.92303e+06	2.34713e+06	2.16146e+06	2.05036e+06	2.50228e+06	2.0407e+06	1.99183e+06	2.41803e+06	2.07755e+06	2.19689e+06	2.31834e+06	2.60477e+06	2.82641e+06	2.17932e+06	2.02126e+06	1.92414e+06	1.73074e+06	1.91429e+06	2.29087e+06	2.69854e+06	2.53956e+06	2.15858e+06	2.4095e+06	3.41174e+06	2.3097e+06	2.20955e+06
ENSGMOP00000001035	9	8	1677.22	0.309921	1.06397	0,5	Kontrol	pep:known_by_projection genescaffold:gadMor1:GeneScaffold_3825:52619:55206:-1 gene:ENSGMOG00000001002 transcript:ENSGMOT00000001072 gene_biotype:protein_coding transcript_biotype:protein_coding	3.64959e+06	3.67194e+06	4.19879e+06	4.02388e+06	3.96382e+06	4.29965e+06	4.92424e+06	3.29515e+06	4.33773e+06	4.82462e+06	4.13455e+06	5.05353e+06	4.15793e+06	3.85286e+06	4.08566e+06	3.77925e+06	4.314e+06	3.97541e+06	3.91736e+06	5.14518e+06	3.96178e+06	4.28064e+06	4.28927e+06	4.48211e+06	4.09184e+06	4.24517e+06	4.52471e+06	4.42111e+06
ENSGMOP00000004785	1	1	200	0.313455	1.39098	Kontrol	0,5	pep:known_by_projection genescaffold:gadMor1:GeneScaffold_362:47265:52612:-1 gene:ENSGMOG00000004524 transcript:ENSGMOT00000004926 gene_biotype:protein_coding transcript_biotype:protein_coding	1.23617e+06	1.16948e+06	1.3108e+06	1.18799e+06	1.44926e+06	1.22876e+06	541344	2.18649e+06	420584	501904	1.57426e+06	987382	795871	1.34848e+06	629490	982585	1.00464e+06	740518	901149	597064	449552	1.0137e+06	784926	511115	1.00633e+06	516695	1.42651e+06	962033
ENSGMOP00000011892	25	22	4086.77	0.0690316	1.16646	Kontrol	2	pep:known_by_projection genescaffold:gadMor1:GeneScaffold_2185:464919:470760:1 gene:ENSGMOG00000011111 transcript:ENSGMOT00000012211 gene_biotype:protein_coding transcript_biotype:protein_coding	1.48855e+07	1.86986e+07	1.99938e+07	2.21033e+07	1.45394e+07	1.87423e+07	1.87519e+07	2.11131e+07	1.78846e+07	2.01389e+07	1.58759e+07	1.41312e+07	1.48258e+07	1.38965e+07	1.48573e+07	2.19724e+07	1.65193e+07	1.68482e+07	1.52408e+07	2.16086e+07	1.78577e+07	1.85536e+07	1.71043e+07	1.57046e+07	1.90184e+07	1.49697e+07	1.40631e+07	1.4447e+07
ENSGMOP00000019025	2	1	198.765	0.1561	1.24932	Kontrol	2	pep:known_by_projection genescaffold:gadMor1:GeneScaffold_1443:61351:84694:-1 gene:ENSGMOG00000017687 transcript:ENSGMOT00000019485 gene_biotype:protein_coding transcript_biotype:protein_coding	94107.7	100269	159202	79343.6	91411.4	80797.9	98583	125328	75385.5	122399	103091	89381.8	54301.5	84818.4	64124	97806.9	72915.8	73721.5	99559.3	76647.9	100556	56858.1	139348	60819.2	111060	76167.6	93564.2	77089.7
ENSGMOP00000017454	3	2	299.565	0.12589	1.2125	0,5	2	pep:known_by_projection genescaffold:gadMor1:GeneScaffold_3560:81907:83723:-1 gene:ENSGMOG00000016275 transcript:ENSGMOT00000017885 gene_biotype:protein_coding transcript_biotype:protein_coding	301409	243015	171821	233761	239905	205719	284154	177475	222283	180219	180997	296078	247196	240685	275498	213522	178710	150825	142732	245462	313951	353933	233361	251148	190016	241285	248277	258147
ENSGMOP00000017565;ENSGMOP00000017609	2	1	300	0.197454	1.17433	Kontrol	2	pep:known_by_projection genescaffold:gadMor1:GeneScaffold_169:286343:288610:1 gene:ENSGMOG00000016367 transcript:ENSGMOT00000017997 gene_biotype:protein_coding transcript_biotype:protein_coding	159040	153940	170827	170294	169898	138038	124285	164055	126237	84995.6	113552	115732	134422	94687.8	170748	148421	151890	90556.7	100163	93605.4	167391	127877	120161	153920	122224	111679	124615	117417
ENSGMOP00000012357	6	6	1097.85	0.266916	1.08141	0,5	Kontrol	pep:known_by_projection genescaffold:gadMor1:GeneScaffold_2117:33683:36101:1 gene:ENSGMOG00000011557 transcript:ENSGMOT00000012686 gene_biotype:protein_coding transcript_biotype:protein_coding	3.8459e+06	3.45067e+06	3.39129e+06	3.83253e+06	3.82339e+06	3.55364e+06	4.77997e+06	3.4091e+06	3.71797e+06	3.74991e+06	3.82378e+06	5.41031e+06	3.57332e+06	3.21208e+06	3.98428e+06	3.54289e+06	3.87759e+06	3.30172e+06	3.22822e+06	4.71914e+06	3.9781e+06	4.10603e+06	3.87348e+06	3.90919e+06	3.48549e+06	4.51414e+06	4.04558e+06	3.91948e+06
ENSGMOP00000017626	20	2	3193.39	0.340191	1.16075	Kontrol	0,5	pep:known_by_projection genescaffold:gadMor1:GeneScaffold_3159:8055:11761:1 gene:ENSGMOG00000016435 transcript:ENSGMOT00000018060 gene_biotype:protein_coding transcript_biotype:protein_coding	800601	690065	1.02322e+06	631070	685907	418332	548191	623881	764391	535924	760497	692430	492151	564298	573967	633319	484156	570062	527144	708347	609583	500111	354469	346014	570945	791625	725701	604853
ENSGMOP00000011003	1	1	200	0.107413	1.17623	2	Kontrol	pep:known_by_projection genescaffold:gadMor1:GeneScaffold_3276:219551:220699:-1 gene:ENSGMOG00000010283 transcript:ENSGMOT00000011301 gene_biotype:protein_coding transcript_biotype:protein_coding	932012	1.0946e+06	971727	1.1031e+06	1.04528e+06	1.17973e+06	1.39449e+06	712621	1.08227e+06	828456	1.2002e+06	1.71076e+06	1.18854e+06	1.07394e+06	1.25716e+06	1.14286e+06	1.34799e+06	999233	1.02982e+06	1.13635e+06	1.1279e+06	1.20404e+06	999605	1.11291e+06	918154	1.04377e+06	1.29462e+06	1.49371e+06
ENSGMOP00000020845	1	1	198.739	0.286404	1.14794	0,5	2	pep:known_by_projection genescaffold:gadMor1:GeneScaffold_2375:43122:47356:1 gene:ENSGMOG00000019378 transcript:ENSGMOT00000021354 gene_biotype:protein_coding transcript_biotype:protein_coding	87777	68051.2	68266.1	79075.8	82590.8	58321.3	70706.6	65345.8	103725	118939	86040.2	102789	90555.2	78098	73397.3	62598.9	64681.6	73278.6	82623	111281	116892	110136	75106.5	75979.8	70747	73428.2	82622.9	103505
ENSGMOP00000011101	39	29	6439.57	0.0213117	1.24354	Kontrol	2	pep:known_by_projection genescaffold:gadMor1:GeneScaffold_1955:83762:90554:-1 gene:ENSGMOG00000010369 transcript:ENSGMOT00000011402 gene_biotype:protein_coding transcript_biotype:protein_coding	1.48734e+08	1.62603e+08	2.29476e+08	2.11759e+08	1.72551e+08	1.75473e+08	2.06405e+08	2.11477e+08	2.15826e+08	1.82118e+08	1.48069e+08	1.32225e+08	1.57221e+08	1.67257e+08	1.38603e+08	1.38356e+08	1.7044e+08	1.7621e+08	1.58614e+08	2.23481e+08	1.90394e+08	1.66668e+08	1.0649e+08	1.87602e+08	1.84017e+08	1.69436e+08	1.83241e+08	1.59338e+08
ENSGMOP00000014896	2	2	200	0.353153	1.11868	0,5	Kontrol	pep:known genescaffold:gadMor1:GeneScaffold_1253:37110:49742:1 gene:ENSGMOG00000013927 transcript:ENSGMOT00000015281 gene_biotype:protein_coding transcript_biotype:protein_coding	267007	294647	431779	318707	339951	354449	354814	323772	322577	353459	443876	458881	334056	317216	362191	280533	387384	298003	398517	444407	464270	385380	304250	293906	321660	437303	316896	415980
ENSGMOP00000002605	1	1	200	0.122133	1.22097	2	Kontrol	pep:known_by_projection genescaffold:gadMor1:GeneScaffold_2425:177536:182022:-1 gene:ENSGMOG00000002457 transcript:ENSGMOT00000002690 gene_biotype:protein_coding transcript_biotype:protein_coding	36289.1	50213.8	26890.8	36007.9	43210.3	37727.2	44808.4	56649.9	45045.5	32565.8	42672.4	41147.1	52408.5	53480.1	58576.9	53943.1	57713.7	47170.6	42774.2	31346.9	52000.4	39506.1	32362.7	45985.5	39776.9	61474	61055.5	68811.9
ENSGMOP00000005014	2	2	200	0.00302772	1.74837	Kontrol	2	pep:known_by_projection genescaffold:gadMor1:GeneScaffold_400:115350:120300:-1 gene:ENSGMOG00000004723 transcript:ENSGMOT00000005159 gene_biotype:protein_coding transcript_biotype:protein_coding	301099	203242	531964	238307	195921	155977	178619	310569	226447	177493	142187	148732	151892	144905	135813	148155	133009	139002	153323	240579	289257	175072	221432	166169	290807	179650	168966	109539
ENSGMOP00000021021	2	1	199.354	0.383157	1.16594	0,5	Kontrol	pep:known_by_projection genescaffold:gadMor1:GeneScaffold_3764:88098:119490:-1 gene:ENSGMOG00000019542 transcript:ENSGMOT00000021534 gene_biotype:protein_coding transcript_biotype:protein_coding	199990	205451	122918	159337	168608	130801	176032	170495	161305	180157	139797	125801	215780	275882	253769	199637	148857	129597	165298	123826	173908	174820	250565	222656	186921	237418	187419	200226
ENSGMOP00000001973	3	3	477.62	0.10395	1.14865	2	Kontrol	pep:known_by_projection genescaffold:gadMor1:GeneScaffold_2066:19001:20018:1 gene:ENSGMOG00000001870 transcript:ENSGMOT00000002037 gene_biotype:protein_coding transcript_biotype:protein_coding	374113	331681	282203	310002	365285	297106	378076	367824	305849	283325	319590	501108	383561	338476	423878	388180	397313	364161	290520	326689	342580	362514	335526	352515	297303	442073	403732	368978
ENSGMOP00000018454	2	1	200	0.248999	1.26498	2	0,5	pep:novel genescaffold:gadMor1:GeneScaffold_2156:359978:363833:1 gene:ENSGMOG00000017179 transcript:ENSGMOT00000018909 gene_biotype:protein_coding transcript_biotype:protein_coding	128182	116700	74167.1	101338	120372	72412.5	89998.3	68096.1	68156.9	132217	45143.9	91706.7	117839	108635	126575	134485	97299	108317	92473.6	79238.4	111182	132778	83610.2	77508.3	103780	9657.27	47746	83738.4
ENSGMOP00000010814	3	3	399.461	0.207041	1.30423	2	Kontrol	pep:known_by_projection genescaffold:gadMor1:GeneScaffold_2801:158165:166393:1 gene:ENSGMOG00000010111 transcript:ENSGMOT00000011112 gene_biotype:protein_coding transcript_biotype:protein_coding	442704	180226	288196	270217	163046	176103	283016	210813	189156	153875	237268	356175	368356	294554	469962	395921	262645	211188	171015	281444	447851	339288	273763	223360	197411	365593	407214	134758
ENSGMOP00000001414	9	9	1393.26	0.134118	1.22038	2	Kontrol	pep:known_by_projection genescaffold:gadMor1:GeneScaffold_3870:262829:269155:-1 gene:ENSGMOG00000001263 transcript:ENSGMOT00000001466 gene_biotype:protein_coding transcript_biotype:protein_coding	2.13455e+06	2.3672e+06	2.60722e+06	2.76181e+06	2.66113e+06	2.89765e+06	2.55461e+06	2.22391e+06	2.93525e+06	2.09077e+06	3.80915e+06	2.80841e+06	4.39301e+06	2.87737e+06	2.99348e+06	2.02717e+06	2.74938e+06	2.97492e+06	3.0827e+06	3.36392e+06	4.37101e+06	3.1393e+06	1.94352e+06	2.52659e+06	2.1526e+06	2.87147e+06	3.24351e+06	2.69397e+06
ENSGMOP00000018970	1	1	100	0.102594	1.44646	Kontrol	2	pep:known_by_projection genescaffold:gadMor1:GeneScaffold_4461:580769:586999:1 gene:ENSGMOG00000017631 transcript:ENSGMOT00000019429 gene_biotype:protein_coding transcript_biotype:protein_coding	110868	83779	183343	78498.9	96057.8	54176	77612	127110	54323	57120.1	52736.3	61151.5	56392.7	64599.2	83769.8	72457.5	78129	40611.1	64380.6	84784.3	104899	78188.3	46740.6	63851.8	83833.1	45551.2	81470.3	64393.9
ENSGMOP00000013118	19	17	2755.44	0.398664	1.05972	Kontrol	0,5	pep:known_by_projection genescaffold:gadMor1:GeneScaffold_2877:578172:604409:-1 gene:ENSGMOG00000012252 transcript:ENSGMOT00000013467 gene_biotype:protein_coding transcript_biotype:protein_coding	4.27569e+06	5.07982e+06	5.41218e+06	4.8469e+06	5.01779e+06	4.64463e+06	4.75928e+06	4.96183e+06	4.25868e+06	4.26164e+06	4.23685e+06	5.28626e+06	4.36739e+06	4.16524e+06	4.67078e+06	5.3239e+06	4.88026e+06	4.35231e+06	4.23104e+06	4.64161e+06	4.81646e+06	4.81847e+06	4.43343e+06	4.52831e+06	4.19378e+06	3.52582e+06	4.93637e+06	4.46234e+06
ENSGMOP00000021227	3	2	498.98	0.193979	1.5788	2	Kontrol	pep:known_by_projection genescaffold:gadMor1:GeneScaffold_1631:106761:108317:-1 gene:ENSGMOG00000019740 transcript:ENSGMOT00000021745 gene_biotype:protein_coding transcript_biotype:protein_coding	34337.2	32629.8	6443.63	28530.6	62591	23975.4	26027.5	41806.5	42256.4	5272.94	21582.2	49117.2	91894.7	60516.1	70215.8	53461.4	27751.9	31631.8	25605.9	9553.39	63032.3	30295.5	19026.8	61500.7	31486.6	76608.1	91495.7	34256.2
ENSGMOP00000000033	1	1	200	0.404278	1.74815	0,5	Kontrol	pep:known genescaffold:gadMor1:GeneScaffold_4535:7275:9708:-1 gene:ENSGMOG00000000029 transcript:ENSGMOT00000000033 gene_biotype:protein_coding transcript_biotype:protein_coding	41486	24845.7	59159.8	126212	41571.3	37627.6	37058.4	62357.1	51236.8	15397.5	88180.7	33471.1	125177	48393.3	63036.7	37155.7	46476	25993.3	55641.8	77780.2	50372.4	79811.5	34472.6	52482.6	17943.4	323416	82721	62874.1
ENSGMOP00000002623	5	4	868.297	0.28062	1.20377	Kontrol	2	pep:known_by_projection genescaffold:gadMor1:GeneScaffold_2112:312676:313658:-1 gene:ENSGMOG00000002484 transcript:ENSGMOT00000002708 gene_biotype:protein_coding transcript_biotype:protein_coding	2.25738e+06	2.60089e+06	1.56181e+06	1.19461e+06	1.47055e+06	1.77434e+06	1.99702e+06	2.64609e+06	2.06475e+06	3.19502e+06	2.01906e+06	1.57693e+06	1.79393e+06	2.03602e+06	1.44684e+06	1.19667e+06	2.48321e+06	1.51104e+06	1.45934e+06	1.72388e+06	1.45846e+06	1.41706e+06	1.90315e+06	2.09636e+06	1.90766e+06	2.46677e+06	1.44215e+06	1.22816e+06
ENSGMOP00000009003	2	2	400	0.128498	1.1577	2	Kontrol	pep:known_by_projection genescaffold:gadMor1:GeneScaffold_3552:28604:43312:1 gene:ENSGMOG00000008409 transcript:ENSGMOT00000009249 gene_biotype:protein_coding transcript_biotype:protein_coding	661122	725612	698304	871238	759568	1.03933e+06	1.0479e+06	656914	903982	724766	730484	1.14419e+06	1.14701e+06	841065	908785	785796	1.06315e+06	949328	858076	968246	779610	917335	745547	747853	930936	959154	857765	1.07075e+06
ENSGMOP00000017446	1	1	100	0.124595	1.86099	2	Kontrol	pep:known_by_projection genescaffold:gadMor1:GeneScaffold_4415:28023:32833:-1 gene:ENSGMOG00000016212 transcript:ENSGMOT00000017877 gene_biotype:protein_coding transcript_biotype:protein_coding	5514.25	5398.93	703.453	3025.25	7544.99	3161.85	3646.15	2816.47	2003.99	2474.83	4713.77	1711.48	12324.9	7662.88	7608.82	8260.66	2915.63	10321	5262.84	1288.91	4049.18	3582.7	4151.37	8657.05	8383.88	6244.81	12040.2	2465.19
ENSGMOP00000006207	2	2	399.7	0.339917	1.12085	0,5	Kontrol	pep:known_by_projection genescaffold:gadMor1:GeneScaffold_807:67356:68852:1 gene:ENSGMOG00000005839 transcript:ENSGMOT00000006385 gene_biotype:protein_coding transcript_biotype:protein_coding	390586	362314	397111	363589	365933	382453	378272	245617	358075	372433	443699	514940	342100	312477	357461	316484	357952	321562	326663	413817	378956	489156	388061	339744	357079	596853	353152	331247
ENSGMOP00000017306;ENSGMOP00000017343	12	4	2272.33	0.372796	1.07486	0,5	Kontrol	pep:known_by_projection genescaffold:gadMor1:GeneScaffold_4475:67849:72173:-1 gene:ENSGMOG00000015962 transcript:ENSGMOT00000017735 gene_biotype:protein_coding transcript_biotype:protein_coding	1.96882e+06	1.9154e+06	1.7787e+06	2.14882e+06	1.99113e+06	1.86147e+06	2.34403e+06	2.02625e+06	2.1633e+06	1.599e+06	2.24435e+06	2.80954e+06	1.97639e+06	1.85343e+06	2.01675e+06	2.04931e+06	2.13373e+06	2.0479e+06	1.76977e+06	2.49345e+06	1.92632e+06	2.28652e+06	1.85915e+06	1.95381e+06	2.06922e+06	2.46213e+06	2.01293e+06	2.08743e+06
ENSGMOP00000011156	38	28	5963.13	0.0481828	1.52522	Kontrol	2	pep:known_by_projection genescaffold:gadMor1:GeneScaffold_4551:457343:464869:-1 gene:ENSGMOG00000010407 transcript:ENSGMOT00000011457 gene_biotype:protein_coding transcript_biotype:protein_coding	5.02387e+07	6.21625e+07	5.08243e+07	4.17268e+07	3.6408e+07	4.67432e+07	5.26731e+07	5.76406e+07	4.47663e+07	1.27262e+08	3.70906e+07	2.77153e+07	3.98106e+07	4.21052e+07	3.24272e+07	3.63209e+07	4.36915e+07	4.2094e+07	3.53529e+07	4.20838e+07	3.50241e+07	7.22599e+07	7.55021e+07	2.76355e+07	5.59858e+07	5.28212e+07	2.91256e+07	3.41444e+07
ENSGMOP00000015147	6	5	991.555	0.410704	1.08262	0,5	Kontrol	pep:known_by_projection genescaffold:gadMor1:GeneScaffold_3530:1396:2842:1 gene:ENSGMOG00000014192 transcript:ENSGMOT00000015536 gene_biotype:protein_coding transcript_biotype:protein_coding	7.4995e+06	1.02721e+07	5.52404e+06	9.82517e+06	8.40421e+06	9.5997e+06	1.13042e+07	8.54539e+06	9.30516e+06	1.04333e+07	8.5514e+06	1.13481e+07	8.45691e+06	8.68092e+06	9.75128e+06	1.02801e+07	1.00237e+07	8.00932e+06	8.47372e+06	9.3342e+06	9.22598e+06	1.13163e+07	1.02668e+07	9.49788e+06	9.9327e+06	1.03624e+07	8.10602e+06	1.03447e+07
ENSGMOP00000009256	2	1	300	0.282318	1.67505	0,5	Kontrol	pep:known_by_projection genescaffold:gadMor1:GeneScaffold_476:51578:78117:-1 gene:ENSGMOG00000008629 transcript:ENSGMOT00000009508 gene_biotype:protein_coding transcript_biotype:protein_coding	28775.9	24979.7	7459.8	21234.2	26866.9	22344.4	13604.3	18427.4	17532.5	22275.5	30713.1	7971.44	46126.6	53292.2	22758.9	35065.1	16836.3	48388.2	31642.6	11214.4	19656.5	19434.8	43338.6	45710.5	64216.1	52766.1	42799	7650.79
ENSGMOP00000001992	2	1	200	0.154989	1.27764	Kontrol	2	pep:known_by_projection genescaffold:gadMor1:GeneScaffold_3511:12437:21314:1 gene:ENSGMOG00000001868 transcript:ENSGMOT00000002057 gene_biotype:protein_coding transcript_biotype:protein_coding	113180	67815.6	124359	72206.8	77800.9	111197	79377.7	71542	56442.2	131916	80723.5	69011.7	70552.3	66861	78222.5	67607.9	75775.8	66218.2	63117.5	68820.9	77768.7	102520	103747	92707.9	69723.8	45100.6	71731.3	66571.2
ENSGMOP00000002875	5	5	499.532	0.41758	1.07687	Kontrol	0,5	pep:known_by_projection genescaffold:gadMor1:GeneScaffold_2425:322525:329130:-1 gene:ENSGMOG00000002725 transcript:ENSGMOT00000002966 gene_biotype:protein_coding transcript_biotype:protein_coding	698356	620312	609284	570472	618108	584326	562644	627187	581686	564535	541605	737427	468364	471133	549843	747308	536943	584053	612059	596853	555992	651644	597471	534953	594030	417207	469212	628024
ENSGMOP00000002447	16	16	2462.61	0.0189456	1.22073	Kontrol	2	pep:known_by_projection genescaffold:gadMor1:GeneScaffold_1544:224045:232425:1 gene:ENSGMOG00000002296 transcript:ENSGMOT00000002528 gene_biotype:protein_coding transcript_biotype:protein_coding	5.66746e+06	4.91666e+06	7.70187e+06	6.54894e+06	5.50973e+06	5.46311e+06	6.15187e+06	6.9414e+06	6.81392e+06	7.79989e+06	5.26618e+06	4.90203e+06	5.19619e+06	5.09801e+06	4.06332e+06	4.57147e+06	6.15937e+06	5.58332e+06	5.98714e+06	6.93245e+06	5.7002e+06	6.29274e+06	4.96449e+06	5.72829e+06	6.65352e+06	4.5725e+06	5.85863e+06	5.59554e+06
ENSGMOP00000012470	33	33	4489.5	0.334034	1.10458	Kontrol	2	pep:known_by_projection genescaffold:gadMor1:GeneScaffold_1263:674625:691993:-1 gene:ENSGMOG00000011649 transcript:ENSGMOT00000012799 gene_biotype:protein_coding transcript_biotype:protein_coding	1.55159e+07	1.12439e+07	1.65703e+07	1.56804e+07	2.00872e+07	1.55403e+07	1.63686e+07	1.88303e+07	1.46639e+07	1.5553e+07	1.13211e+07	1.34848e+07	1.39566e+07	1.28373e+07	1.33845e+07	1.39773e+07	1.89751e+07	1.52043e+07	1.72687e+07	1.9861e+07	1.23425e+07	1.59552e+07	9.81094e+06	1.57145e+07	1.59752e+07	1.20878e+07	1.42073e+07	1.46985e+07
ENSGMOP00000017732	6	5	775.839	0.110469	1.39176	0,5	2	pep:known_by_projection genescaffold:gadMor1:GeneScaffold_3282:305:52642:1 gene:ENSGMOG00000016510 transcript:ENSGMOT00000018170 gene_biotype:protein_coding transcript_biotype:protein_coding	1.96326e+06	868007	1.27773e+06	1.26807e+06	1.37321e+06	1.41255e+06	1.23637e+06	1.47759e+06	1.97047e+06	1.12391e+06	1.62187e+06	1.08705e+06	1.6063e+06	923595	1.15538e+06	967899	1.44652e+06	1.79565e+06	663373	1.56901e+06	1.44954e+06	1.48302e+06	1.8302e+06	1.2344e+06	2.05611e+06	3.5427e+06	1.07123e+06	1.44566e+06
ENSGMOP00000014946	1	1	100	0.253107	1.15228	2	0,5	pep:known_by_projection genescaffold:gadMor1:GeneScaffold_2998:31516:36175:1 gene:ENSGMOG00000013987 transcript:ENSGMOT00000015332 gene_biotype:protein_coding transcript_biotype:protein_coding	58303	35101.8	68871	67491.6	48009.9	56812	54837.5	49187.5	89422.1	60150.5	48754.9	68550	49933.6	56956.4	69340.3	55184.7	62781.8	60741.2	62266	62428.8	59784.7	38758.8	37252.2	42110.1	47306.5	52023.8	58524.3	65681.6
ENSGMOP00000017941	2	2	394.715	0.41471	1.13663	Kontrol	0,5	pep:known_by_projection genescaffold:gadMor1:GeneScaffold_4066:28650:32674:-1 gene:ENSGMOG00000016717 transcript:ENSGMOT00000018380 gene_biotype:protein_coding transcript_biotype:protein_coding	509330	636460	559862	863280	627245	670533	746058	788431	809210	542021	645324	343821	767369	721661	660943	555363	628631	686136	529276	624644	615547	646237	482032	747857	779920	268653	656730	525073
ENSGMOP00000017046	5	4	597.54	0.415819	1.16131	Kontrol	0,5	pep:known_by_projection genescaffold:gadMor1:GeneScaffold_2545:4175:11220:1 gene:ENSGMOG00000015901 transcript:ENSGMOT00000017473 gene_biotype:protein_coding transcript_biotype:protein_coding	570092	431114	636530	514820	494407	976865	633750	476846	443267	476771	473182	664329	396447	332439	424003	604391	677218	577063	425123	422208	534340	535897	760026	358454	334309	382665	382343	671890
ENSGMOP00000015878;ENSGMOP00000015857;ENSGMOP00000015903;ENSGMOP00000015920;ENSGMOP00000015940	1	1	100	0.0591483	1.30576	Kontrol	2	pep:known genescaffold:gadMor1:GeneScaffold_1253:606974:617072:-1 gene:ENSGMOG00000014728 transcript:ENSGMOT00000016282 gene_biotype:protein_coding transcript_biotype:protein_coding	332550	279101	361221	314603	263798	185910	420205	387375	294700	366378	152296	168546	211798	180067	246944	314348	337708	340337	257596	330678	330781	259482	198455	216066	265594	318974	251470	293451
ENSGMOP00000000262	2	2	398.577	0.170644	1.20357	2	Kontrol	pep:known_by_projection genescaffold:gadMor1:GeneScaffold_3986:11351:56660:1 gene:ENSGMOG00000000250 transcript:ENSGMOT00000000270 gene_biotype:protein_coding transcript_biotype:protein_coding	217168	276134	153986	231017	275243	229389	169817	296703	266873	162383	210292	221438	262845	298023	301425	323609	265479	280037	305187	168324	248926	199123	225591	408267	287178	279336	359166	210514
ENSGMOP00000019695	3	3	299.558	0.152255	1.09712	2	Kontrol	pep:known_by_projection genescaffold:gadMor1:GeneScaffold_1038:113827:121954:1 gene:ENSGMOG00000018289 transcript:ENSGMOT00000020174 gene_biotype:protein_coding transcript_biotype:protein_coding	301378	347422	318115	300628	358413	397496	368837	311189	312221	331157	302707	374152	373947	356292	396216	355863	424092	344098	377339	406625	372918	382497	320971	334021	286668	341321	414240	350694
ENSGMOP00000019915	3	1	399.085	0.386991	1.1001	0,5	Kontrol	pep:known_by_projection genescaffold:gadMor1:GeneScaffold_1427:154243:165684:1 gene:ENSGMOG00000018515 transcript:ENSGMOT00000020400 gene_biotype:protein_coding transcript_biotype:protein_coding	109106	93343.1	69964.5	92696.4	100523	101246	79628.6	90057.8	78824.4	84740.7	77422.1	93955.6	108911	103979	128502	122287	89834.1	77778.3	80239	81018	118044	88839.5	89118.8	103023	98331.1	121129	106201	85507.6
ENSGMOP00000021257	5	5	793.229	0.0289803	1.18375	Kontrol	2	pep:known_by_projection genescaffold:gadMor1:GeneScaffold_2750:12053:13582:1 gene:ENSGMOG00000019770 transcript:ENSGMOT00000021775 gene_biotype:protein_coding transcript_biotype:protein_coding	1.87525e+06	1.42063e+06	1.88561e+06	1.53224e+06	1.54378e+06	1.34919e+06	1.47373e+06	1.67452e+06	1.36108e+06	1.3257e+06	1.27405e+06	1.75791e+06	1.18878e+06	1.28489e+06	1.38596e+06	1.32716e+06	1.32975e+06	1.09228e+06	1.09951e+06	1.42866e+06	1.57907e+06	1.51568e+06	1.40364e+06	1.40513e+06	1.36827e+06	1.65071e+06	1.38604e+06	1.09631e+06
ENSGMOP00000002713;ENSGMOP00000015425	2	1	382.206	0.219573	1.27474	2	Kontrol	pep:known_by_projection genescaffold:gadMor1:GeneScaffold_2078:5649:20862:1 gene:ENSGMOG00000002558 transcript:ENSGMOT00000002800 gene_biotype:protein_coding transcript_biotype:protein_coding	59468.5	37616.3	26930.9	35512	42871.5	29987.5	24496.4	44670.6	45543.8	24066.8	35740	37241.6	68683	64370.8	40519.7	60785.5	38939.2	45773.7	33771.8	25792.3	44973.1	36148.4	37587.6	37558.8	90040.2	61651.4	49412.9	31669.1
ENSGMOP00000001408;ENSGMOP00000010465	3	3	596.099	0.332917	1.05137	Kontrol	2	pep:known genescaffold:gadMor1:GeneScaffold_259:94564:101251:1 gene:ENSGMOG00000001342 transcript:ENSGMOT00000001458 gene_biotype:protein_coding transcript_biotype:protein_coding	1.7893e+06	1.85647e+06	2.11756e+06	1.82158e+06	1.86198e+06	1.95828e+06	1.99149e+06	1.93972e+06	1.75459e+06	1.58264e+06	1.80826e+06	1.8249e+06	1.72013e+06	1.77977e+06	1.81824e+06	1.67986e+06	1.73205e+06	1.78293e+06	1.83897e+06	2.03823e+06	1.55919e+06	1.86843e+06	1.76792e+06	1.73292e+06	1.44753e+06	1.81127e+06	1.87547e+06	1.95927e+06
ENSGMOP00000013098	2	2	198.198	0.439599	1.38057	0,5	Kontrol	pep:known_by_projection genescaffold:gadMor1:GeneScaffold_1706:35:34333:-1 gene:ENSGMOG00000012236 transcript:ENSGMOT00000013447 gene_biotype:protein_coding transcript_biotype:protein_coding	312426	88298.8	315995	245996	119970	199322	238633	251033	104119	191929	316879	241456	310202	139873	169574	72009.4	353295	412426	223731	268946	472905	206881	142629	328917	352042	159509	137540	499794
ENSGMOP00000015095	4	4	399.339	0.334639	1.17479	Kontrol	2	pep:known_by_projection genescaffold:gadMor1:GeneScaffold_3682:86780:149271:1 gene:ENSGMOG00000014119 transcript:ENSGMOT00000015482 gene_biotype:protein_coding transcript_biotype:protein_coding	138459	124566	227774	148569	204251	166542	257044	182008	203839	174636	172511	100285	132427	225732	105523	130614	199280	207846	125959	170131	165168	164074	95180.8	184630	281268	136525	82874.9	144987
ENSGMOP00000012317	6	6	988.715	0.406322	1.22327	Kontrol	0,5	pep:known_by_projection genescaffold:gadMor1:GeneScaffold_1997:10717:19053:-1 gene:ENSGMOG00000011520 transcript:ENSGMOT00000012645 gene_biotype:protein_coding transcript_biotype:protein_coding	881108	910160	601687	1.39142e+06	1.13362e+06	1.20918e+06	777188	2.11368e+06	1.31284e+06	1.3856e+06	678441	799813	847901	1.22581e+06	976159	1.33912e+06	1.3626e+06	864900	800301	707549	1.38383e+06	866156	1.12699e+06	1.01223e+06	657921	587103	1.02664e+06	1.25174e+06
ENSGMOP00000021936;ENSGMOP00000022011	7	1	1199.08	0.0186786	1.91124	2	Kontrol	pep:known_by_projection genescaffold:gadMor1:GeneScaffold_4254:67855:68292:1 gene:ENSGMOG00000020449 transcript:ENSGMOT00000022454 gene_biotype:protein_coding transcript_biotype:protein_coding	47997.3	38011.1	24841.2	17198.4	42477.7	21831.6	26728.8	21343.9	16947.1	25759.3	31744.4	22825.2	67946.8	82790.7	62369.1	45989.9	40731.1	70040.4	62591.1	15519.2	31714.7	16426.5	27476.4	52121.1	40863.3	57817.8	85128.4	32769.3
ENSGMOP00000012517	4	4	399.88	0.108076	1.1928	Kontrol	2	pep:known_by_projection genescaffold:gadMor1:GeneScaffold_3223:19199:25588:1 gene:ENSGMOG00000011704 transcript:ENSGMOT00000012847 gene_biotype:protein_coding transcript_biotype:protein_coding	577036	618064	1.10645e+06	683851	689295	720627	734177	975217	701234	656042	675891	604214	724617	620945	542644	625291	658875	540376	637417	735739	856555	682987	574181	692534	642526	774707	591040	508859
ENSGMOP00000008161	32	8	5161.96	0.110016	1.49645	Kontrol	2	pep:known genescaffold:gadMor1:GeneScaffold_4029:70094:72110:1 gene:ENSGMOG00000007626 transcript:ENSGMOT00000008394 gene_biotype:protein_coding transcript_biotype:protein_coding	2.06261e+07	1.86217e+07	4.03344e+07	1.67983e+07	2.1211e+07	1.09189e+07	1.37033e+07	3.25468e+07	1.73327e+07	1.18397e+07	1.92478e+07	1.60615e+07	8.30552e+06	1.41947e+07	1.32252e+07	1.78105e+07	1.14946e+07	9.98363e+06	1.23269e+07	1.75327e+07	2.34012e+07	1.70893e+07	1.40094e+07	1.50953e+07	2.62114e+07	9.4251e+06	1.29843e+07	9.54244e+06
ENSGMOP00000009940	3	2	393.877	0.412296	1.10479	0,5	Kontrol	pep:known_by_projection genescaffold:gadMor1:GeneScaffold_2888:27823:40638:-1 gene:ENSGMOG00000009256 transcript:ENSGMOT00000010208 gene_biotype:protein_coding transcript_biotype:protein_coding	163296	190168	171597	170444	209869	157499	203981	190349	168237	127766	183437	298822	167038	156714	202212	203518	213267	137618	169312	202051	253494	177816	176492	161832	171298	203227	208874	188143
ENSGMOP00000018685;ENSGMOP00000018694	3	3	400	0.01279	1.33109	2	Kontrol	pep:known_by_projection genescaffold:gadMor1:GeneScaffold_4454:7539:15651:1 gene:ENSGMOG00000017297 transcript:ENSGMOT00000019142 gene_biotype:protein_coding transcript_biotype:protein_coding	4.20343e+06	4.45379e+06	2.68251e+06	3.48112e+06	5.00565e+06	3.81754e+06	4.03316e+06	3.76308e+06	3.72346e+06	2.54118e+06	4.4845e+06	4.29733e+06	5.63766e+06	5.2122e+06	6.15037e+06	5.30821e+06	4.75172e+06	4.90345e+06	4.42436e+06	2.74223e+06	4.34789e+06	3.32097e+06	3.87968e+06	5.92144e+06	4.10353e+06	4.28106e+06	6.07453e+06	3.84425e+06
ENSGMOP00000012132	2	2	200	0.151987	1.51535	Kontrol	2	pep:known_by_projection genescaffold:gadMor1:GeneScaffold_4319:2800:32527:1 gene:ENSGMOG00000011337 transcript:ENSGMOT00000012458 gene_biotype:protein_coding transcript_biotype:protein_coding	32992.9	33828.9	44144.1	42748.3	59035.7	25973.4	19648.8	84363.6	29403.9	26030.6	22367	11063.8	23382.8	44416.5	28319.7	25036.2	25687.2	24480.6	31729	30367.6	35482.9	27824.4	28985.7	38431.4	52929.8	17549.1	35349.6	11535.3
ENSGMOP00000017070	15	15	2078.72	0.217745	1.10141	2	Kontrol	pep:known_by_projection genescaffold:gadMor1:GeneScaffold_3257:30667:33230:1 gene:ENSGMOG00000015928 transcript:ENSGMOT00000017498 gene_biotype:protein_coding transcript_biotype:protein_coding	7.67934e+06	7.36964e+06	7.93146e+06	8.28315e+06	9.08336e+06	7.59006e+06	9.09944e+06	8.39272e+06	7.97242e+06	5.51339e+06	8.63781e+06	1.05502e+07	8.56799e+06	8.52053e+06	9.35475e+06	6.9298e+06	9.68516e+06	8.04434e+06	7.93521e+06	8.26468e+06	8.56228e+06	8.10903e+06	6.66425e+06	8.91624e+06	8.55166e+06	9.43381e+06	8.26922e+06	9.2172e+06
ENSGMOP00000015662	9	8	1399.47	0.263799	1.1216	Kontrol	2	pep:known_by_projection genescaffold:gadMor1:GeneScaffold_3633:67386:71322:-1 gene:ENSGMOG00000014642 transcript:ENSGMOT00000016063 gene_biotype:protein_coding transcript_biotype:protein_coding	1.0418e+07	1.15116e+07	9.84273e+06	1.37015e+07	1.30954e+07	1.00565e+07	1.00792e+07	1.19849e+07	1.53871e+07	1.37467e+07	7.17132e+06	9.33156e+06	1.16652e+07	1.45903e+07	9.15077e+06	9.35807e+06	1.23392e+07	1.27565e+07	9.78682e+06	1.069e+07	9.91937e+06	1.09672e+07	8.13101e+06	1.12828e+07	1.27985e+07	1.01795e+07	1.17582e+07	1.14851e+07
ENSGMOP00000011124	8	1	999.995	0.270351	1.47851	Kontrol	2	pep:known_by_projection genescaffold:gadMor1:GeneScaffold_4551:436993:440279:-1 gene:ENSGMOG00000010395 transcript:ENSGMOT00000011425 gene_biotype:protein_coding transcript_biotype:protein_coding	1.51574e+06	1.93862e+06	1.01466e+06	1.19982e+06	1.12393e+06	1.29161e+06	1.55502e+06	1.39395e+06	1.33248e+06	4.53442e+06	1.28144e+06	723694	1.19316e+06	1.42606e+06	949816	1.02421e+06	1.33239e+06	1.36148e+06	995253	1.24987e+06	385870	2.38142e+06	2.31572e+06	777547	1.8239e+06	1.37534e+06	896079	1.0082e+06
ENSGMOP00000007509	1	1	99.2188	0.0218514	1.62068	Kontrol	2	pep:known_by_projection genescaffold:gadMor1:GeneScaffold_293:2575132:2576662:1 gene:ENSGMOG00000007051 transcript:ENSGMOT00000007724 gene_biotype:protein_coding transcript_biotype:protein_coding	389449	318395	486578	269998	232682	294786	237593	329182	292097	734224	315843	108718	218431	241487	172066	215344	210888	250222	257822	322407	274421	361473	439734	181852	365535	318562	189837	176475
ENSGMOP00000015032	24	16	3180.46	0.0721904	1.26045	Kontrol	2	pep:known_by_projection genescaffold:gadMor1:GeneScaffold_2709:55141:59082:-1 gene:ENSGMOG00000014067 transcript:ENSGMOT00000015419 gene_biotype:protein_coding transcript_biotype:protein_coding	1.91481e+07	1.41074e+07	2.65794e+07	1.443e+07	1.36807e+07	1.29227e+07	1.78549e+07	1.94832e+07	1.80031e+07	2.29374e+07	1.39461e+07	2.02496e+07	1.15233e+07	1.28126e+07	1.19831e+07	1.42635e+07	1.19733e+07	1.68932e+07	1.42714e+07	2.22367e+07	1.56881e+07	1.56151e+07	1.67384e+07	1.28781e+07	1.52646e+07	1.67111e+07	1.2842e+07	1.40248e+07
ENSGMOP00000015154	6	1	599.461	0.311529	7.53099	0,5	Kontrol	pep:novel genescaffold:gadMor1:GeneScaffold_446:1142:7091:1 gene:ENSGMOG00000014186 transcript:ENSGMOT00000015543 gene_biotype:protein_coding transcript_biotype:protein_coding	885.93	5708.08	289.492	289.311	1084.73	1503.47	466.843	762.959	549.411	558.632	10882.8	324.02	2727.67	3359.38	292.192	1968.48	600.826	10092.8	5543.98	222.916	602.648	1460.49	28518.6	924.998	39267.4	10205.6	644.26	157.854
ENSGMOP00000016320	1	1	100	0.0557957	1.383	2	Kontrol	pep:novel genescaffold:gadMor1:GeneScaffold_3164:163130:166556:1 gene:ENSGMOG00000015233 transcript:ENSGMOT00000016736 gene_biotype:protein_coding transcript_biotype:protein_coding	73610.3	55178.4	76024.1	73510.2	71413.4	98293.6	72041	75355.1	79297.3	79528.5	70869.9	124137	131794	86593.4	94857.3	93548.6	98407.4	97868.9	140743	113172	50112.4	78876.1	61371.9	75241.7	69300.8	123753	177443	91297.2
ENSGMOP00000013317	5	3	600	0.47557	1.07531	Kontrol	0,5	pep:known_by_projection genescaffold:gadMor1:GeneScaffold_299:1296944:1298610:1 gene:ENSGMOG00000012438 transcript:ENSGMOT00000013671 gene_biotype:protein_coding transcript_biotype:protein_coding	195695	260294	195708	278313	262155	197882	215623	230635	221106	202885	247640	204948	210899	234739	189893	192181	239685	259023	197337	199417	177598	244694	174564	226561	256115	218751	191692	202401
ENSGMOP00000003864	5	1	589.936	0.212841	1.47862	2	Kontrol	pep:known_by_projection genescaffold:gadMor1:GeneScaffold_3590:301139:302956:-1 gene:ENSGMOG00000003530 transcript:ENSGMOT00000003981 gene_biotype:protein_coding transcript_biotype:protein_coding	87154.9	79403.8	9060.02	35623.5	83569.2	42068.5	85462.2	2849.44	14608.9	5399.01	41068.1	74845	92770	76520.9	137830	78134	40949.7	16721.7	33611.5	9125.15	83702.9	64137.4	46933.6	71303.3	35732.7	22708.3	80234.5	64571.2
ENSGMOP00000004343	37	35	6053.75	0.147631	1.38452	Kontrol	2	pep:known_by_projection genescaffold:gadMor1:GeneScaffold_1290:117869:119005:-1 gene:ENSGMOG00000004100 transcript:ENSGMOT00000004476 gene_biotype:protein_coding transcript_biotype:protein_coding	2.34216e+08	2.10716e+08	3.23266e+08	1.69825e+08	1.51612e+08	1.96497e+08	1.56778e+08	2.05482e+08	1.67351e+08	4.41546e+08	2.11919e+08	6.9151e+07	1.7465e+08	1.82137e+08	1.32838e+08	1.49642e+08	1.60984e+08	1.95903e+08	1.90113e+08	1.99605e+08	1.60961e+08	2.23022e+08	2.80403e+08	1.11767e+08	2.00489e+08	2.38737e+08	1.23081e+08	1.24771e+08
ENSGMOP00000010468	5	3	499.677	0.197263	1.1909	2	Kontrol	pep:known_by_projection genescaffold:gadMor1:GeneScaffold_320:63344:68479:1 gene:ENSGMOG00000009792 transcript:ENSGMOT00000010752 gene_biotype:protein_coding transcript_biotype:protein_coding	339965	465741	433933	302669	320172	374090	381028	390131	328705	274706	420543	435932	530068	422016	418752	444165	471980	302407	424596	369917	599719	453503	468682	357178	202986	428378	464251	403507
ENSGMOP00000003239;ENSGMOP00000010659;ENSGMOP00000012828;ENSGMOP00000012830;ENSGMOP00000012832;ENSGMOP00000021187;ENSGMOP00000021195;ENSGMOP00000021202;ENSGMOP00000021233;ENSGMOP00000021372;ENSGMOP00000021453;ENSGMOP00000021504;ENSGMOP00000021505;ENSGMOP00000021536;ENSGMOP00000021537;ENSGMOP00000021538;ENSGMOP00000021647;ENSGMOP00000021660;ENSGMOP00000021777;ENSGMOP00000021896;ENSGMOP00000022063	6	6	1170.24	0.190123	1.31021	Kontrol	2	pep:known genescaffold:gadMor1:GeneScaffold_2759:862321:864332:-1 gene:ENSGMOG00000003096 transcript:ENSGMOT00000003340 gene_biotype:protein_coding transcript_biotype:protein_coding	1.79295e+07	1.42084e+07	3.03547e+07	1.41594e+07	1.57391e+07	1.24625e+07	1.56789e+07	2.0868e+07	1.31459e+07	1.07896e+07	7.89559e+06	1.24443e+07	9.73528e+06	1.15457e+07	1.73553e+07	1.75534e+07	1.50673e+07	9.82574e+06	1.21489e+07	1.55966e+07	1.96946e+07	1.6931e+07	1.36754e+07	1.63037e+07	1.26494e+07	5.83628e+06	1.37707e+07	1.14982e+07
ENSGMOP00000010977	12	11	2079.21	0.0532448	1.2849	Kontrol	2	pep:known_by_projection genescaffold:gadMor1:GeneScaffold_3046:60920:74848:-1 gene:ENSGMOG00000010254 transcript:ENSGMOT00000011275 gene_biotype:protein_coding transcript_biotype:protein_coding	9.46697e+06	8.76342e+06	1.55388e+07	1.54353e+07	1.07363e+07	1.10297e+07	1.26605e+07	1.35587e+07	1.35227e+07	9.50069e+06	8.9851e+06	8.92282e+06	8.47487e+06	9.02491e+06	8.4168e+06	8.81041e+06	9.22857e+06	1.16656e+07	1.06734e+07	1.39464e+07	1.0173e+07	1.28019e+07	5.96716e+06	1.07703e+07	1.25415e+07	1.21562e+07	1.0205e+07	8.90533e+06
ENSGMOP00000017521	8	8	1196.35	0.0306122	1.24426	Kontrol	2	pep:known_by_projection genescaffold:gadMor1:GeneScaffold_61:1166:3388:1 gene:ENSGMOG00000016340 transcript:ENSGMOT00000017953 gene_biotype:protein_coding transcript_biotype:protein_coding	4.73443e+06	3.65471e+06	3.33006e+06	4.26531e+06	3.98286e+06	3.5422e+06	3.96309e+06	6.43682e+06	4.44088e+06	4.38833e+06	3.36899e+06	4.33315e+06	2.79771e+06	3.31114e+06	3.19463e+06	3.34619e+06	3.4944e+06	3.50393e+06	3.56369e+06	5.26898e+06	4.38474e+06	4.20929e+06	3.66467e+06	3.22213e+06	4.23051e+06	3.33561e+06	3.28913e+06	3.46131e+06
ENSGMOP00000013718	1	1	100	0.0759375	1.21043	Kontrol	2	pep:known_by_projection genescaffold:gadMor1:GeneScaffold_1855:1139:2969:1 gene:ENSGMOG00000012816 transcript:ENSGMOT00000014079 gene_biotype:protein_coding transcript_biotype:protein_coding	659936	443007	567349	605418	468287	487387	463183	508877	495786	419547	362508	440073	402364	488086	469288	452058	368214	396723	426695	511885	612830	532540	285745	460656	466284	420733	376850	585558
ENSGMOP00000013275	1	1	100	0.0160428	3.54084	2	Kontrol	pep:known_by_projection genescaffold:gadMor1:GeneScaffold_3465:11478:15892:-1 gene:ENSGMOG00000012399 transcript:ENSGMOT00000013627 gene_biotype:protein_coding transcript_biotype:protein_coding	2498.39	4813.33	189.144	1702.52	3410.82	3781.58	520.732	575.642	638.529	870.152	3967.77	1190.1	14632.3	13634.3	5622.94	7139.22	4169.25	4567.51	5627.72	304.831	8306.33	1625.97	3662.71	5033.16	651.119	2828.23	11300.1	731.758
ENSGMOP00000016383	3	3	499.461	0.475921	1.12598	0,5	Kontrol	pep:known_by_projection genescaffold:gadMor1:GeneScaffold_733:270819:273293:-1 gene:ENSGMOG00000015298 transcript:ENSGMOT00000016799 gene_biotype:protein_coding transcript_biotype:protein_coding	1.4052e+06	1.40985e+06	1.17243e+06	1.65631e+06	1.77975e+06	1.49929e+06	2.14633e+06	772047	1.42472e+06	971451	1.58155e+06	2.4171e+06	1.49398e+06	1.34841e+06	1.7695e+06	915352	1.76013e+06	1.25888e+06	1.48238e+06	1.71295e+06	1.27872e+06	1.63244e+06	1.18578e+06	1.70385e+06	1.31617e+06	2.01737e+06	1.66256e+06	1.91798e+06
ENSGMOP00000014384	8	3	1090.68	0.156314	1.48848	2	Kontrol	pep:known_by_projection genescaffold:gadMor1:GeneScaffold_2992:4805:70015:1 gene:ENSGMOG00000013453 transcript:ENSGMOT00000014754 gene_biotype:protein_coding transcript_biotype:protein_coding	1.27789e+06	1.21126e+06	430538	2.43858e+06	1.06772e+06	2.09317e+06	1.79173e+06	1.41294e+06	2.37515e+06	3.92868e+06	2.59722e+06	1.07705e+06	3.47834e+06	3.64596e+06	2.0565e+06	2.07412e+06	2.42805e+06	4.44733e+06	2.34582e+06	2.01482e+06	1.37372e+06	3.38171e+06	2.35137e+06	922716	3.02407e+06	3.93487e+06	1.09831e+06	2.73851e+06
ENSGMOP00000004739	1	1	100	0.463275	1.11306	Kontrol	0,5	pep:known_by_projection genescaffold:gadMor1:GeneScaffold_2461:134509:137572:1 gene:ENSGMOG00000004469 transcript:ENSGMOT00000004879 gene_biotype:protein_coding transcript_biotype:protein_coding	57971.6	65513.2	38230.2	62093.9	63982.5	68559.7	68434	80202.4	55599.9	53885.1	50000.2	41927.1	75926.3	57815.5	72394.2	72058.9	63179.1	48561.1	56601	41022	59803.9	52342.5	57716.2	78732	66854.6	27672.2	79237	33471.8
ENSGMOP00000008023;ENSGMOP00000010420;ENSGMOP00000013949;ENSGMOP00000015790;ENSGMOP00000018521;ENSGMOP00000018533;ENSGMOP00000020165	3	3	299.503	0.354087	1.0802	2	0,5	pep:known_by_projection genescaffold:gadMor1:GeneScaffold_3512:6562:9924:1 gene:ENSGMOG00000007501 transcript:ENSGMOT00000008254 gene_biotype:protein_coding transcript_biotype:protein_coding	662091	736044	522117	727190	701875	739914	671413	719390	591505	759640	582433	730572	721070	674412	624168	846771	688863	710296	632782	602792	663603	741274	729003	708474	703667	463674	613047	524682
ENSGMOP00000007231	13	11	1663.79	0.373081	1.0974	Kontrol	2	pep:known_by_projection genescaffold:gadMor1:GeneScaffold_2237:61485:65630:-1 gene:ENSGMOG00000006801 transcript:ENSGMOT00000007435 gene_biotype:protein_coding transcript_biotype:protein_coding	2.44707e+06	1.92769e+06	1.97026e+06	1.63023e+06	1.85448e+06	1.62981e+06	1.70052e+06	2.36282e+06	1.67756e+06	1.60101e+06	1.65401e+06	1.87381e+06	1.82869e+06	1.67638e+06	1.7112e+06	1.98132e+06	1.60194e+06	1.45159e+06	1.64053e+06	1.6926e+06	2.34614e+06	1.80712e+06	2.07237e+06	1.73484e+06	1.65466e+06	1.23033e+06	1.57199e+06	1.54407e+06
ENSGMOP00000000442;ENSGMOP00000009372	1	1	100	0.0249171	1.73998	Kontrol	2	pep:novel contig::contig585059:76:1106:-1 gene:ENSGMOG00000000455 transcript:ENSGMOT00000000468 gene_biotype:protein_coding transcript_biotype:protein_coding	80169.8	36669	119781	80741.6	44726.8	54462	38238.3	91753.9	84917.2	33093	46972.3	21008.8	26393.1	26457.1	38691.3	45735.2	49570.3	42731.4	46178	66374.9	51731.1	62391.6	24340.8	54800.3	61779.2	33682.1	59626.6	50150.1
ENSGMOP00000004232	1	1	200	0.0035296	1.29635	Kontrol	2	pep:known_by_projection genescaffold:gadMor1:GeneScaffold_4577:259866:260983:1 gene:ENSGMOG00000004004 transcript:ENSGMOT00000004362 gene_biotype:protein_coding transcript_biotype:protein_coding	505841	451123	725632	615055	616577	726778	623518	592255	733516	597845	399028	570417	411990	399116	487083	520439	560994	489800	457283	691035	558534	675455	493958	672671	559271	452442	524784	502003
ENSGMOP00000008028	1	1	100	0.205448	1.1606	0,5	2	pep:known_by_projection genescaffold:gadMor1:GeneScaffold_4201:318335:320217:-1 gene:ENSGMOG00000007505 transcript:ENSGMOT00000008259 gene_biotype:protein_coding transcript_biotype:protein_coding	140770	141630	93012.7	152575	136554	109452	117510	132256	107394	86516	95115.7	140760	114219	108710	161560	132324	128276	80461.2	80546	117404	122380	158027	114438	114556	161117	135116	146085	140193
ENSGMOP00000009549	1	1	100	0.131493	1.32333	Kontrol	2	pep:known_by_projection genescaffold:gadMor1:GeneScaffold_1768:49610:96624:-1 gene:ENSGMOG00000008915 transcript:ENSGMOT00000009808 gene_biotype:protein_coding transcript_biotype:protein_coding	32786.3	22421.6	47476.8	38762.1	35947.4	24445.3	27585.6	48634.5	30230	20945.6	29131.2	27053.1	17318.3	21177.9	28183.7	27294.4	25533	24382.5	23839.7	45081.6	41686.4	31046.4	19495.5	25775.9	27891.9	25415.3	20429.4	20785
ENSGMOP00000010221	5	5	797.958	0.459352	1.05549	Kontrol	0,5	pep:known_by_projection genescaffold:gadMor1:GeneScaffold_1451:138306:142938:-1 gene:ENSGMOG00000009564 transcript:ENSGMOT00000010499 gene_biotype:protein_coding transcript_biotype:protein_coding	1.26214e+06	1.24931e+06	1.06606e+06	1.38938e+06	1.26546e+06	1.35802e+06	1.49299e+06	1.36755e+06	1.35687e+06	1.31524e+06	1.10559e+06	1.57034e+06	1.15395e+06	1.30324e+06	1.23907e+06	1.24005e+06	1.44556e+06	1.45674e+06	1.24012e+06	1.18181e+06	1.11902e+06	1.25353e+06	1.27455e+06	1.3367e+06	1.28222e+06	1.03278e+06	1.31281e+06	1.39634e+06
ENSGMOP00000010841	1	1	100	0.399977	1.38928	Kontrol	2	pep:known_by_projection genescaffold:gadMor1:GeneScaffold_1612:19498:32321:-1 gene:ENSGMOG00000010136 transcript:ENSGMOT00000011139 gene_biotype:protein_coding transcript_biotype:protein_coding	48741.3	34177.8	61690.6	24790.9	47137	27464	37431.3	72495.1	28054.9	18670.9	35345.6	20544.3	29746.3	21600	27816.3	37122.9	35650	25510.8	26213.4	33550.1	66460.3	41593.2	35458.6	41327	29781.9	5341.74	21859.9	24682.9
ENSGMOP00000011600	1	1	100	0.296603	1.23581	Kontrol	2	pep:known_by_projection genescaffold:gadMor1:GeneScaffold_1134:120509:121939:-1 gene:ENSGMOG00000010856 transcript:ENSGMOT00000011916 gene_biotype:protein_coding transcript_biotype:protein_coding	164094	197544	320709	200838	171579	149659	121043	157796	145339	135294	129215	146428	143715	116381	160572	200782	154150	103319	130023	163049	161123	182212	215931	148580	199545	70274.1	125239	114923
ENSGMOP00000016727	1	1	200	0.0157924	1.6032	2	Kontrol	pep:known_by_projection genescaffold:gadMor1:GeneScaffold_1605:106508:110356:-1 gene:ENSGMOG00000015607 transcript:ENSGMOT00000017146 gene_biotype:protein_coding transcript_biotype:protein_coding	101579	77150.4	45452.1	65885.4	102964	54681.8	47202	83509.8	74359	21568.2	95617.1	80393.7	106097	130506	143007	128548	96010.7	107843	84988.6	42470.7	78948.4	59212.8	60189.5	131268	83682.2	68694.4	147120	63063
ENSGMOP00000009386	5	5	898.332	0.487923	1.10113	Kontrol	0,5	pep:known_by_projection genescaffold:gadMor1:GeneScaffold_1681:84575:88180:1 gene:ENSGMOG00000008776 transcript:ENSGMOT00000009639 gene_biotype:protein_coding transcript_biotype:protein_coding	1.04116e+06	1.00181e+06	1.30294e+06	791804	922002	819423	835978	992730	687872	1.328e+06	752715	795888	929209	937572	972930	962530	929588	893939	930394	690270	934203	815849	1.06721e+06	828703	856425	1.03028e+06	891103	833594
ENSGMOP00000016552	20	13	2782.24	0.289729	1.17198	Kontrol	2	pep:novel genescaffold:gadMor1:GeneScaffold_3833:32797:47808:-1 gene:ENSGMOG00000015445 transcript:ENSGMOT00000016970 gene_biotype:protein_coding transcript_biotype:protein_coding	1.10727e+07	1.53519e+07	1.41662e+07	1.24189e+07	1.24906e+07	1.28666e+07	8.3348e+06	1.25148e+07	9.35217e+06	1.05284e+07	1.23587e+07	1.13726e+07	9.06468e+06	9.55703e+06	9.18677e+06	1.34833e+07	8.47214e+06	8.65187e+06	9.31125e+06	1.03691e+07	9.44259e+06	1.30981e+07	1.66117e+07	1.02123e+07	1.47087e+07	7.12055e+06	7.46218e+06	8.4357e+06
ENSGMOP00000011169	5	5	699.995	0.169414	1.12369	2	Kontrol	pep:known_by_projection genescaffold:gadMor1:GeneScaffold_2007:858623:863814:-1 gene:ENSGMOG00000010432 transcript:ENSGMOT00000011470 gene_biotype:protein_coding transcript_biotype:protein_coding	522485	549351	421753	492670	555157	505215	608472	596286	486157	389491	541566	722910	564278	528254	649002	648410	582576	459229	488834	511886	580657	445389	549322	594931	504577	598314	584922	556654
ENSGMOP00000019749	20	16	2786.65	0.360749	1.07053	2	Kontrol	pep:known_by_projection genescaffold:gadMor1:GeneScaffold_162:14701:19338:1 gene:ENSGMOG00000018350 transcript:ENSGMOT00000020228 gene_biotype:protein_coding transcript_biotype:protein_coding	5.19414e+06	5.53091e+06	4.99534e+06	5.2268e+06	5.44836e+06	5.64448e+06	5.77931e+06	5.09987e+06	5.07401e+06	4.95252e+06	6.37658e+06	7.59591e+06	5.55318e+06	4.78186e+06	5.65513e+06	5.52455e+06	5.58835e+06	4.962e+06	4.97452e+06	6.55865e+06	5.78919e+06	5.81101e+06	5.69256e+06	5.11868e+06	5.11931e+06	5.79716e+06	5.21528e+06	5.23608e+06
ENSGMOP00000014381	14	13	1897.35	0.499667	1.07477	0,5	Kontrol	pep:known_by_projection genescaffold:gadMor1:GeneScaffold_1523:149496:154492:-1 gene:ENSGMOG00000013448 transcript:ENSGMOT00000014751 gene_biotype:protein_coding transcript_biotype:protein_coding	3.42047e+06	2.78282e+06	2.15064e+06	2.31194e+06	3.13187e+06	2.07434e+06	3.10623e+06	2.85828e+06	2.76864e+06	1.85352e+06	2.45174e+06	3.25234e+06	2.58801e+06	2.68939e+06	2.69671e+06	3.03124e+06	2.78301e+06	2.2382e+06	3.14074e+06	2.64724e+06	3.59426e+06	3.02057e+06	2.33159e+06	2.57832e+06	2.96023e+06	2.72337e+06	2.77701e+06	2.96085e+06
ENSGMOP00000001334;ENSGMOP00000004065;ENSGMOP00000015014;ENSGMOP00000015726	4	3	499.892	0.481184	1.23559	Kontrol	0,5	pep:novel genescaffold:gadMor1:GeneScaffold_20:4017:6146:-1 gene:ENSGMOG00000001280 transcript:ENSGMOT00000001383 gene_biotype:protein_coding transcript_biotype:protein_coding	761699	1.00063e+06	1.72117e+06	1.32177e+06	694625	1.00595e+06	1.42676e+06	613108	1.49569e+06	1.96452e+06	1.51533e+06	680442	1.09345e+06	693380	1.23558e+06	547259	1.27758e+06	965492	1.10225e+06	507600	1.27138e+06	1.52329e+06	683280	794945	1.18695e+06	672890	965847	1.13894e+06
ENSGMOP00000016374	4	3	495.033	0.454631	1.10573	0,5	Kontrol	pep:known_by_projection genescaffold:gadMor1:GeneScaffold_3769:68757:76105:1 gene:ENSGMOG00000015277 transcript:ENSGMOT00000016790 gene_biotype:protein_coding transcript_biotype:protein_coding	640905	510186	367209	433559	678067	420861	362794	575240	467376	477599	480546	357912	395096	667628	596057	574317	457996	466939	460828	491147	431630	689608	492406	441392	533902	722848	596459	510509
ENSGMOP00000007204	1	1	100	0.52119	1.27036	Kontrol	0,5	pep:novel genescaffold:gadMor1:GeneScaffold_1770:267640:270413:1 gene:ENSGMOG00000006775 transcript:ENSGMOT00000007408 gene_biotype:protein_coding transcript_biotype:protein_coding	78636.4	150319	86509.4	42400.9	64319.4	93332	48721	58653.2	46603.8	140937	43156.4	86210.1	58978.3	80599	62717	105331	95735.4	29135.9	79338.1	44550.9	79755	103879	104448	61448.7	43973	27360	57580.6	51166.2
ENSGMOP00000016337	6	4	799.552	0.177454	1.11116	Kontrol	2	pep:known_by_projection genescaffold:gadMor1:GeneScaffold_4407:229812:232991:1 gene:ENSGMOG00000015265 transcript:ENSGMOT00000016753 gene_biotype:protein_coding transcript_biotype:protein_coding	6.73533e+06	5.87959e+06	7.42125e+06	6.94427e+06	7.23681e+06	6.95216e+06	6.77443e+06	8.26203e+06	8.12167e+06	6.90973e+06	5.77234e+06	7.44408e+06	6.46206e+06	5.55489e+06	5.84043e+06	6.34667e+06	6.82515e+06	6.73972e+06	6.71455e+06	9.73451e+06	6.12701e+06	7.25876e+06	6.41735e+06	6.04313e+06	5.86033e+06	6.75867e+06	5.82759e+06	6.61848e+06
ENSGMOP00000011809	2	1	194.465	0.513858	1.16727	0,5	Kontrol	pep:known_by_projection genescaffold:gadMor1:GeneScaffold_2494:328127:332389:-1 gene:ENSGMOG00000011041 transcript:ENSGMOT00000012126 gene_biotype:protein_coding transcript_biotype:protein_coding	45132.5	36073.3	22233.9	32524.4	46159.1	24288.8	34694.7	24454.7	23147.7	9277.28	27166.7	50749.5	36071.6	30978.1	49131.7	32720.8	29950.6	19947.1	18587.8	27591.3	42331.1	49916	19413.7	33375.4	29147.2	30131.6	46674.8	34466.2
ENSGMOP00000010907	26	25	4396.22	0.150462	1.13811	Kontrol	2	pep:known_by_projection genescaffold:gadMor1:GeneScaffold_1248:19272:26949:1 gene:ENSGMOG00000010197 transcript:ENSGMOT00000011205 gene_biotype:protein_coding transcript_biotype:protein_coding	1.22239e+08	1.11284e+08	1.73619e+08	1.50616e+08	1.5174e+08	1.56266e+08	1.5046e+08	1.6222e+08	1.62855e+08	1.60037e+08	9.59534e+07	1.51301e+08	1.11112e+08	1.28391e+08	1.30419e+08	1.41053e+08	1.49785e+08	1.40764e+08	1.38455e+08	1.40208e+08	1.37626e+08	1.26968e+08	1.16494e+08	1.54383e+08	1.38071e+08	1.12112e+08	1.65145e+08	1.63348e+08
ENSGMOP00000019735	3	2	290.145	0.367404	1.25584	Kontrol	2	pep:known_by_projection genescaffold:gadMor1:GeneScaffold_1448:64317:75568:-1 gene:ENSGMOG00000018332 transcript:ENSGMOT00000020214 gene_biotype:protein_coding transcript_biotype:protein_coding	144862	163206	236231	101469	211734	134951	105322	205831	112312	132005	138431	94531.7	139423	156206	101424	88508.3	111856	116390	162551	120199	356909	117249	144791	73165.6	85861.5	137883	131940	82313.4
ENSGMOP00000017704	7	1	1200	0.515046	1.10454	Kontrol	0,5	pep:known_by_projection genescaffold:gadMor1:GeneScaffold_222:35:2709:-1 gene:ENSGMOG00000016498 transcript:ENSGMOT00000018139 gene_biotype:protein_coding transcript_biotype:protein_coding	93941.3	88117.7	131582	102918	89725	79896.5	89219.8	124460	72108.1	106809	103337	80189.6	68826.7	81362.8	122667	111800	107937	89767.7	88269.2	109187	89719	102110	86098.3	76493.1	72757.4	101974	64811.6	94373.6
ENSGMOP00000006315	22	20	2982.17	0.523405	1.2614	0,5	2	pep:known_by_projection genescaffold:gadMor1:GeneScaffold_2102:390009:409388:-1 gene:ENSGMOG00000005919 transcript:ENSGMOT00000006496 gene_biotype:protein_coding transcript_biotype:protein_coding	1.71264e+07	2.70848e+07	4.14759e+06	2.16238e+07	1.36245e+07	4.105e+07	3.72061e+07	1.426e+07	2.12377e+07	8.41747e+07	2.28702e+07	1.20619e+07	4.03895e+07	2.88874e+07	2.15749e+07	2.54339e+07	2.32237e+07	2.82167e+07	2.46354e+07	2.87351e+07	1.70429e+07	3.24568e+07	6.74192e+07	2.65245e+07	1.90469e+07	4.43247e+07	2.07187e+07	3.04389e+07
ENSGMOP00000000183	1	1	300	0.119575	1.39694	2	Kontrol	pep:known_by_projection genescaffold:gadMor1:GeneScaffold_716:12153:39149:-1 gene:ENSGMOG00000000178 transcript:ENSGMOT00000000187 gene_biotype:protein_coding transcript_biotype:protein_coding	49433.4	76816.4	22665.6	51960.9	55081.4	51325.9	26085.2	53208.9	51004.4	29228.1	83584.4	36485.4	59177.3	95949.1	56879.5	73749.6	60515.7	69171	51383.4	32437.6	40922.6	55931.1	51194.5	54401.6	81532.6	115874	54525.4	31852.9
ENSGMOP00000007237	4	4	498.547	0.125018	1.14089	2	Kontrol	pep:known_by_projection genescaffold:gadMor1:GeneScaffold_2237:69537:70027:1 gene:ENSGMOG00000006808 transcript:ENSGMOT00000007441 gene_biotype:protein_coding transcript_biotype:protein_coding	1.3125e+06	1.21372e+06	820051	929073	908945	1.15786e+06	1.15245e+06	1.04321e+06	1.06353e+06	800652	1.16215e+06	1.31069e+06	1.34523e+06	1.05553e+06	1.20441e+06	1.32342e+06	1.18784e+06	1.00005e+06	1.09147e+06	963354	1.37929e+06	1.26033e+06	1.23463e+06	1.17682e+06	914977	1.15292e+06	937209	1.04006e+06
ENSGMOP00000004848	1	1	184.805	0.236204	1.19519	2	Kontrol	pep:known_by_projection genescaffold:gadMor1:GeneScaffold_2384:152901:156551:1 gene:ENSGMOG00000004577 transcript:ENSGMOT00000004989 gene_biotype:protein_coding transcript_biotype:protein_coding	170221	182193	53032.9	142203	196306	166675	204989	211153	233426	104769	143488	176993	176260	240938	180590	230016	244336	210885	187460	132677	197607	174573	147508	198043	199595	174824	236750	193847
ENSGMOP00000009772	10	9	1283.63	0.503427	1.08075	0,5	Kontrol	pep:known_by_projection genescaffold:gadMor1:GeneScaffold_986:65609:72352:-1 gene:ENSGMOG00000009136 transcript:ENSGMOT00000010033 gene_biotype:protein_coding transcript_biotype:protein_coding	2.68409e+06	2.40833e+06	2.55906e+06	2.60668e+06	2.74466e+06	2.43148e+06	3.19469e+06	2.22628e+06	2.5443e+06	1.85522e+06	2.72197e+06	3.84908e+06	2.31381e+06	2.11979e+06	2.87281e+06	2.26073e+06	2.75168e+06	2.14171e+06	2.27918e+06	3.38342e+06	2.72458e+06	3.01801e+06	2.4519e+06	2.77953e+06	2.24984e+06	2.53506e+06	2.62479e+06	2.79748e+06
ENSGMOP00000011463	3	3	299.677	0.45244	1.22921	0,5	2	pep:known_by_projection genescaffold:gadMor1:GeneScaffold_2677:61005:64855:-1 gene:ENSGMOG00000010705 transcript:ENSGMOT00000011775 gene_biotype:protein_coding transcript_biotype:protein_coding	193336	211082	232738	211781	247946	309315	136543	191720	154873	410206	334000	219114	178988	240991	170670	206425	213296	244691	204367	304253	241858	185204	326758	184350	316848	536576	165588	212400
ENSGMOP00000005052	5	4	698.95	0.504893	1.06973	Kontrol	0,5	pep:known_by_projection genescaffold:gadMor1:GeneScaffold_1205:76035:90621:-1 gene:ENSGMOG00000004761 transcript:ENSGMOT00000005199 gene_biotype:protein_coding transcript_biotype:protein_coding	238743	157604	217757	186854	190212	182534	220819	209415	178377	222981	186536	239945	179732	146395	190528	196384	180972	208307	183575	216127	158915	176034	208097	170802	209820	205970	146086	195276
ENSGMOP00000006825	2	2	200	0.299362	1.23157	2	0,5	pep:known_by_projection genescaffold:gadMor1:GeneScaffold_504:17127:24354:1 gene:ENSGMOG00000006425 transcript:ENSGMOT00000007023 gene_biotype:protein_coding transcript_biotype:protein_coding	188489	221558	112833	241880	221204	297481	266407	231851	130683	219693	233641	173361	191674	292349	175743	217468	178783	201829	382085	169528	89841.3	146937	104467	269731	239622	193630	217290	231001
ENSGMOP00000003023	1	1	100	0.116557	1.46101	2	Kontrol	pep:known_by_projection genescaffold:gadMor1:GeneScaffold_3322:171312:173258:1 gene:ENSGMOG00000002872 transcript:ENSGMOT00000003118 gene_biotype:protein_coding transcript_biotype:protein_coding	17686.9	14914.1	7021.32	11347.9	17465	8662.61	7939.29	17865.5	10401.2	5033.4	12025.2	14894.5	17608.4	18867.7	27538	25102.8	16363.5	11164.2	12038.5	6325.45	14804.8	9043.37	9474.84	21560.9	16103.3	15887.6	29465.1	11472.7
ENSGMOP00000019264;ENSGMOP00000019291;ENSGMOP00000019331	1	1	100	0.386462	1.36847	Kontrol	2	pep:known_by_projection genescaffold:gadMor1:GeneScaffold_3153:555969:559875:1 gene:ENSGMOG00000017641 transcript:ENSGMOT00000019729 gene_biotype:protein_coding transcript_biotype:protein_coding	26408.2	42076.8	19382.4	23699.8	23944.1	45907.9	16859.4	18115.9	22792.8	75795.2	34694.8	12370.5	22763.9	29567	11828.9	24900.8	19745.1	26105.2	25178.1	15161.3	20468.6	26036.2	53078.4	12363	20820.4	19439.2	29405.3	23359.1
ENSGMOP00000004583	5	1	499.731	0.539329	1.43879	2	Kontrol	pep:novel genescaffold:gadMor1:GeneScaffold_2686:79185:80738:-1 gene:ENSGMOG00000004326 transcript:ENSGMOT00000004721 gene_biotype:protein_coding transcript_biotype:protein_coding	58726.9	26615.9	25661.1	54184.4	64058.3	47319.5	49061.5	57561.3	83601.7	36979.4	44370.3	24305.8	160265	53721.5	91895.8	81858.1	73519.7	10476.9	111924	40684.1	53470.4	58713	44581.3	43459.9	104791	84723.9	127062	60691.9
ENSGMOP00000011948	13	8	1884.23	0.0302189	1.1807	2	Kontrol	pep:known_by_projection genescaffold:gadMor1:GeneScaffold_2004:1291715:1296322:1 gene:ENSGMOG00000011175 transcript:ENSGMOT00000012270 gene_biotype:protein_coding transcript_biotype:protein_coding	3.37011e+06	3.33555e+06	2.60081e+06	3.80018e+06	3.05598e+06	2.98869e+06	2.71217e+06	3.42601e+06	2.93489e+06	3.00544e+06	4.00061e+06	3.1132e+06	3.58032e+06	3.85125e+06	3.53611e+06	4.10775e+06	3.14145e+06	4.5435e+06	3.31156e+06	3.08637e+06	2.79778e+06	2.95961e+06	3.92581e+06	3.01595e+06	4.10764e+06	3.77745e+06	3.12092e+06	3.27215e+06
ENSGMOP00000020309	8	6	1298.05	0.350696	1.12037	2	Kontrol	pep:known_by_projection genescaffold:gadMor1:GeneScaffold_138:40285:42109:1 gene:ENSGMOG00000018907 transcript:ENSGMOT00000020809 gene_biotype:protein_coding transcript_biotype:protein_coding	2.015e+06	2.00652e+06	1.78974e+06	2.18204e+06	2.00677e+06	2.37955e+06	2.85658e+06	1.96534e+06	2.01203e+06	1.64969e+06	2.38161e+06	3.43837e+06	2.21685e+06	1.89941e+06	2.78273e+06	2.0946e+06	2.58031e+06	1.77668e+06	1.86647e+06	2.39238e+06	2.35298e+06	2.5156e+06	1.9718e+06	2.17483e+06	1.8535e+06	2.41051e+06	2.25202e+06	2.34304e+06
ENSGMOP00000013292	9	9	1476.37	0.0162471	1.15633	Kontrol	2	pep:known_by_projection genescaffold:gadMor1:GeneScaffold_3480:86742:95522:-1 gene:ENSGMOG00000012416 transcript:ENSGMOT00000013646 gene_biotype:protein_coding transcript_biotype:protein_coding	6.16199e+06	6.94612e+06	7.14778e+06	6.88394e+06	7.19726e+06	5.79838e+06	5.73219e+06	7.1842e+06	6.91035e+06	5.56356e+06	6.19184e+06	5.0032e+06	4.85149e+06	6.38392e+06	5.07122e+06	5.99219e+06	5.89534e+06	5.94436e+06	5.66673e+06	7.45374e+06	6.29818e+06	6.82298e+06	5.97299e+06	6.17565e+06	6.24315e+06	5.24989e+06	5.63166e+06	6.13573e+06
ENSGMOP00000015093	3	3	299.892	0.216212	1.47815	2	Kontrol	pep:known_by_projection genescaffold:gadMor1:GeneScaffold_4528:28451:43300:1 gene:ENSGMOG00000014141 transcript:ENSGMOT00000015480 gene_biotype:protein_coding transcript_biotype:protein_coding	223557	156719	302912	240385	305797	56937.6	130786	193158	144058	7304.27	280695	240207	103418	244221	546261	240820	353936	151596	182385	161495	211986	257857	159371	144280	116048	182076	226719	285742
ENSGMOP00000005601	9	4	1196.06	0.00494627	1.16225	Kontrol	2	pep:known_by_projection genescaffold:gadMor1:GeneScaffold_2842:4:91483:1 gene:ENSGMOG00000005261 transcript:ENSGMOT00000005767 gene_biotype:protein_coding transcript_biotype:protein_coding	2.35037e+06	2.20848e+06	2.06297e+06	2.2955e+06	2.36202e+06	2.58872e+06	2.28849e+06	2.51189e+06	2.44682e+06	2.76146e+06	1.68114e+06	2.2419e+06	1.88212e+06	2.2512e+06	1.86052e+06	2.19574e+06	2.32393e+06	1.98942e+06	2.06327e+06	2.20809e+06	2.16422e+06	2.60222e+06	2.22938e+06	2.46813e+06	2.24465e+06	1.93713e+06	2.42547e+06	2.22511e+06
ENSGMOP00000001793	1	1	99.5692	0.397402	1.17069	2	0,5	pep:known_by_projection genescaffold:gadMor1:GeneScaffold_2155:518:39303:-1 gene:ENSGMOG00000001709 transcript:ENSGMOT00000001854 gene_biotype:protein_coding transcript_biotype:protein_coding	25489.5	19570.4	16300	23303.8	23005.1	9006.98	7913.29	18257.5	18413.3	17558.1	17192	9862.48	18217.3	23774.7	22687.9	17480.1	17451.7	20009.8	16408.9	16468	17802.1	15917.7	14816.4	20735.6	29295.4	2517.22	12996	8758.14
ENSGMOP00000014543	6	6	973.858	0.134553	1.14936	Kontrol	2	pep:known_by_projection genescaffold:gadMor1:GeneScaffold_3753:16358:22446:1 gene:ENSGMOG00000013593 transcript:ENSGMOT00000014917 gene_biotype:protein_coding transcript_biotype:protein_coding	2.05904e+06	1.91153e+06	2.98759e+06	2.3296e+06	1.81047e+06	1.89016e+06	1.90956e+06	2.29164e+06	2.34958e+06	1.98817e+06	2.50494e+06	1.87556e+06	1.99579e+06	1.81881e+06	1.73274e+06	1.45403e+06	1.81587e+06	1.96892e+06	1.69018e+06	2.39216e+06	2.17452e+06	2.2395e+06	1.74165e+06	1.71932e+06	2.06215e+06	2.12358e+06	1.64842e+06	1.85147e+06
ENSGMOP00000010732	14	12	1782.16	0.363466	1.09724	Kontrol	2	pep:known_by_projection genescaffold:gadMor1:GeneScaffold_3746:212798:220252:-1 gene:ENSGMOG00000010040 transcript:ENSGMOT00000011030 gene_biotype:protein_coding transcript_biotype:protein_coding	4.30116e+06	3.99751e+06	3.17838e+06	4.12228e+06	3.79507e+06	3.44923e+06	3.49703e+06	4.88754e+06	3.36837e+06	3.46849e+06	3.38592e+06	3.47067e+06	3.1961e+06	3.42277e+06	3.33476e+06	4.13994e+06	3.39586e+06	3.98405e+06	2.89251e+06	3.09325e+06	3.65704e+06	4.06062e+06	3.51555e+06	3.86867e+06	4.03809e+06	2.27379e+06	3.65534e+06	3.87048e+06
ENSGMOP00000010756	3	3	400	0.192683	1.28751	Kontrol	2	pep:known_by_projection genescaffold:gadMor1:GeneScaffold_2027:19564:21880:-1 gene:ENSGMOG00000010066 transcript:ENSGMOT00000011054 gene_biotype:protein_coding transcript_biotype:protein_coding	1.0178e+06	947432	1.51037e+06	816115	858156	1.0184e+06	1.03667e+06	1.25819e+06	876170	1.76685e+06	685020	616373	1.02777e+06	994505	921761	960408	734258	888698	934667	596133	1.32569e+06	613977	1.64433e+06	1.04036e+06	818226	1.32699e+06	891637	697590
ENSGMOP00000011361;ENSGMOP00000012362;ENSGMOP00000015842	2	2	190.683	0.457091	1.11295	2	Kontrol	pep:known_by_projection genescaffold:gadMor1:GeneScaffold_1511:843939:844329:1 gene:ENSGMOG00000010611 transcript:ENSGMOT00000011669 gene_biotype:protein_coding transcript_biotype:protein_coding	77914.1	60769.9	52219.7	70903.7	63852.2	56897.3	86060.5	80111.3	62698.6	65908.5	62978.2	82518.7	54899.9	60835.3	110974	79032.7	95584.7	66381.4	65253.8	95107.3	82932.9	89946.2	65762	60480.3	62129.2	64517.6	71459	77914.5
ENSGMOP00000014277	2	2	200	0.556154	1.1093	Kontrol	0,5	pep:known_by_projection genescaffold:gadMor1:GeneScaffold_2981:16132:25903:1 gene:ENSGMOG00000013341 transcript:ENSGMOT00000014646 gene_biotype:protein_coding transcript_biotype:protein_coding	217483	219135	286047	241906	260061	171778	239975	297116	197314	159864	214676	328629	164753	173132	192414	242284	244297	205884	190635	247151	246252	199911	166274	189048	179226	182572	218917	229131
ENSGMOP00000000275	2	2	197.658	0.534067	1.1053	Kontrol	0,5	pep:known_by_projection genescaffold:gadMor1:GeneScaffold_1971:477357:482332:-1 gene:ENSGMOG00000000273 transcript:ENSGMOT00000000284 gene_biotype:protein_coding transcript_biotype:protein_coding	128043	149368	193232	114486	137358	111356	135973	157039	116721	86501.2	112263	102720	153315	141403	131267	137731	150069	119021	111829	123956	148751	132698	108990	145115	83086.8	112439	123283	104710
ENSGMOP00000020899	11	11	1180.62	0.346255	1.09519	Kontrol	2	pep:known_by_projection genescaffold:gadMor1:GeneScaffold_655:3822:7455:-1 gene:ENSGMOG00000019427 transcript:ENSGMOT00000021411 gene_biotype:protein_coding transcript_biotype:protein_coding	1.84551e+06	1.55634e+06	1.61123e+06	1.61674e+06	1.72149e+06	1.38398e+06	1.22051e+06	1.80966e+06	1.41001e+06	1.18388e+06	1.40312e+06	1.51057e+06	1.40264e+06	1.36059e+06	1.40248e+06	1.57556e+06	1.32968e+06	1.41945e+06	1.2178e+06	1.4874e+06	1.47712e+06	1.58797e+06	1.55699e+06	1.43545e+06	1.73907e+06	1.13319e+06	1.30533e+06	1.21948e+06
ENSGMOP00000007895	15	14	2273.6	0.535253	1.07279	0,5	Kontrol	pep:known_by_projection genescaffold:gadMor1:GeneScaffold_1288:638660:659414:-1 gene:ENSGMOG00000007377 transcript:ENSGMOT00000008125 gene_biotype:protein_coding transcript_biotype:protein_coding	4.54398e+06	3.27187e+06	4.2262e+06	3.84475e+06	3.80573e+06	3.45614e+06	5.05272e+06	4.73982e+06	3.74514e+06	3.67695e+06	4.38232e+06	4.42763e+06	4.20653e+06	3.09515e+06	4.53643e+06	4.64206e+06	4.36131e+06	4.22177e+06	4.25783e+06	5.32126e+06	4.32429e+06	4.54402e+06	3.48432e+06	4.49386e+06	3.30164e+06	4.38807e+06	4.9922e+06	4.12152e+06
ENSGMOP00000006318	5	5	996.709	0.427999	1.13658	0,5	2	pep:known_by_projection genescaffold:gadMor1:GeneScaffold_672:169629:175898:-1 gene:ENSGMOG00000005945 transcript:ENSGMOT00000006499 gene_biotype:protein_coding transcript_biotype:protein_coding	556088	513197	839596	808104	609325	586591	693137	889251	880952	828268	727145	657767	706558	619481	633080	551828	757198	865921	800974	923925	835118	814959	441036	858642	784918	977143	871510	675905
ENSGMOP00000012152	3	3	400	0.556769	1.34293	0,5	Kontrol	pep:known_by_projection genescaffold:gadMor1:GeneScaffold_601:167062:176305:1 gene:ENSGMOG00000011365 transcript:ENSGMOT00000012478 gene_biotype:protein_coding transcript_biotype:protein_coding	240648	282955	172261	450966	258610	408411	447151	203077	474472	656663	487877	492546	435227	361400	264230	277184	205982	745699	433020	568045	138146	256201	631253	308886	345114	978246	459148	660257
ENSGMOP00000005884	26	22	3259.16	0.472243	1.14911	Kontrol	2	pep:known_by_projection genescaffold:gadMor1:GeneScaffold_4175:285:22795:1 gene:ENSGMOG00000005514 transcript:ENSGMOT00000006057 gene_biotype:protein_coding transcript_biotype:protein_coding	2.60745e+07	2.17739e+07	3.74418e+07	2.31413e+07	1.82204e+07	2.07211e+07	3.18229e+07	2.77845e+07	2.96955e+07	4.32897e+07	2.17055e+07	3.09799e+07	2.14328e+07	2.13226e+07	2.02708e+07	2.09765e+07	2.23762e+07	3.26166e+07	2.75921e+07	3.89644e+07	2.31711e+07	2.49459e+07	2.65777e+07	2.03792e+07	2.03997e+07	1.49253e+07	2.22277e+07	3.14168e+07
ENSGMOP00000013469	18	15	2596.9	0.465158	1.12465	Kontrol	2	pep:known_by_projection genescaffold:gadMor1:GeneScaffold_1579:630684:636597:-1 gene:ENSGMOG00000012590 transcript:ENSGMOT00000013825 gene_biotype:protein_coding transcript_biotype:protein_coding	6.89587e+06	6.45409e+06	1.07935e+07	9.95627e+06	7.56754e+06	9.3195e+06	1.10809e+07	1.16248e+07	1.28769e+07	9.26229e+06	7.63089e+06	9.13684e+06	6.18076e+06	1.01885e+07	7.85823e+06	6.76635e+06	8.27473e+06	1.18045e+07	8.84825e+06	1.15175e+07	7.08828e+06	9.7581e+06	6.93845e+06	8.12986e+06	1.21011e+07	8.66785e+06	5.81907e+06	7.42245e+06
ENSGMOP00000015013	11	1	1568.46	0.0604611	1.72884	2	0,5	pep:novel genescaffold:gadMor1:GeneScaffold_3791:145323:172903:-1 gene:ENSGMOG00000013979 transcript:ENSGMOT00000015399 gene_biotype:protein_coding transcript_biotype:protein_coding	30914.2	50899.1	34483.2	18146.7	48760.1	34077.3	27834.1	24273	27455.6	17264.8	34034.2	57305.1	43301.1	39836.1	25145.4	104275	17311.1	36773.1	40754.7	11235.6	19366.6	31309.7	41495.7	25875.4	32086.9	24512.2	18904.8	25850.4
ENSGMOP00000005457	5	5	698.084	0.552618	1.08485	0,5	Kontrol	pep:known_by_projection genescaffold:gadMor1:GeneScaffold_1876:1350429:1356714:-1 gene:ENSGMOG00000005159 transcript:ENSGMOT00000005620 gene_biotype:protein_coding transcript_biotype:protein_coding	951051	1.02531e+06	980973	1.00597e+06	1.12385e+06	1.0287e+06	1.21318e+06	1.0488e+06	1.00705e+06	837819	1.127e+06	1.69902e+06	1.03293e+06	853757	1.08435e+06	895087	1.05687e+06	872937	920450	1.29633e+06	1.22064e+06	1.25537e+06	893722	1.05767e+06	907631	1.27826e+06	1.03077e+06	1.04069e+06
ENSGMOP00000001459	34	28	5473.74	0.443423	1.1397	Kontrol	2	pep:known_by_projection genescaffold:gadMor1:GeneScaffold_3956:670961:674857:1 gene:ENSGMOG00000001392 transcript:ENSGMOT00000001510 gene_biotype:protein_coding transcript_biotype:protein_coding	7.3946e+07	6.12138e+07	9.4691e+07	1.0942e+08	5.82035e+07	6.4136e+07	6.61864e+07	1.00224e+08	1.02451e+08	8.10071e+07	8.21785e+07	3.43448e+07	8.52361e+07	8.37291e+07	5.97836e+07	6.75278e+07	6.78308e+07	9.32274e+07	6.69511e+07	1.05018e+08	7.85594e+07	8.70822e+07	5.04417e+07	6.12849e+07	8.98762e+07	5.65154e+07	5.39477e+07	6.21787e+07
ENSGMOP00000008085	6	6	1000	0.553748	1.17627	Kontrol	0,5	pep:known_by_projection genescaffold:gadMor1:GeneScaffold_1288:909213:912360:1 gene:ENSGMOG00000007554 transcript:ENSGMOT00000008316 gene_biotype:protein_coding transcript_biotype:protein_coding	8.23378e+06	7.71055e+06	1.43618e+07	1.40935e+07	6.9706e+06	5.79845e+06	8.25632e+06	1.4929e+07	1.48976e+07	1.35291e+07	8.91285e+06	8.22931e+06	9.13116e+06	8.61569e+06	6.88748e+06	7.84465e+06	1.11e+07	1.02294e+07	1.37191e+07	1.5327e+07	9.09053e+06	8.1018e+06	5.51728e+06	6.25765e+06	1.29272e+07	7.29501e+06	8.61966e+06	1.00953e+07
ENSGMOP00000007323	9	4	1398.43	0.471509	1.11211	Kontrol	2	pep:known_by_projection genescaffold:gadMor1:GeneScaffold_4575:66343:70099:-1 gene:ENSGMOG00000006893 transcript:ENSGMOT00000007531 gene_biotype:protein_coding transcript_biotype:protein_coding	1.58142e+06	888949	1.3279e+06	1.10351e+06	1.06853e+06	946602	1.04391e+06	1.43872e+06	778480	889077	1.03023e+06	950122	849944	859651	1.10556e+06	1.21829e+06	986876	986811	968809	1.34227e+06	1.10447e+06	984796	834213	982796	1.15738e+06	937530	883964	795065
ENSGMOP00000012862	2	2	199.88	0.485646	1.16157	Kontrol	0,5	pep:known_by_projection genescaffold:gadMor1:GeneScaffold_2607:12116:23100:1 gene:ENSGMOG00000012020 transcript:ENSGMOT00000013203 gene_biotype:protein_coding transcript_biotype:protein_coding	116253	177577	183260	176327	163184	221326	222439	168361	141066	96983.4	62034.5	123791	209568	126958	262957	136250	154854	114032	144375	168815	151334	89338.2	77524.4	173408	148987	171604	192380	118050
ENSGMOP00000011859	17	17	3087.17	0.376782	1.25161	Kontrol	2	pep:known_by_projection genescaffold:gadMor1:GeneScaffold_2007:1290717:1291796:1 gene:ENSGMOG00000011090 transcript:ENSGMOT00000012177 gene_biotype:protein_coding transcript_biotype:protein_coding	5.64034e+07	7.14941e+07	1.19442e+08	1.41334e+08	9.10157e+07	5.38451e+07	7.9793e+07	1.04963e+08	1.2776e+08	7.28665e+07	8.95368e+07	3.23743e+07	6.89975e+07	8.26893e+07	4.4909e+07	4.54054e+07	5.57404e+07	1.12285e+08	1.2883e+08	1.35705e+08	7.31844e+07	1.37985e+08	2.87663e+07	5.07406e+07	5.22048e+07	8.76542e+07	6.2542e+07	7.77737e+07
ENSGMOP00000018565	1	1	100	0.46113	1.47061	0,5	Kontrol	pep:known_by_projection genescaffold:gadMor1:GeneScaffold_4280:89012:93200:-1 gene:ENSGMOG00000017276 transcript:ENSGMOT00000019021 gene_biotype:protein_coding transcript_biotype:protein_coding	262014	306019	527753	233015	261455	251333	209296	1.68514e+06	233558	438986	527216	265845	649380	612079	1.11325e+06	532683	325655	532057	231867	185778	280738	282541	396685	236236	2.10238e+06	1.16695e+06	573548	610091
ENSGMOP00000006154	7	4	995.802	0.471466	1.05985	0,5	2	pep:known_by_projection genescaffold:gadMor1:GeneScaffold_4611:683125:687088:1 gene:ENSGMOG00000005791 transcript:ENSGMOT00000006330 gene_biotype:protein_coding transcript_biotype:protein_coding	3.45512e+06	3.25436e+06	2.58368e+06	3.67561e+06	3.44168e+06	3.05594e+06	3.93512e+06	3.3741e+06	3.41315e+06	2.65823e+06	3.51834e+06	4.16892e+06	3.07744e+06	2.8202e+06	3.54821e+06	3.2581e+06	3.51398e+06	2.75066e+06	2.82123e+06	4.01997e+06	3.54605e+06	3.45434e+06	3.0192e+06	3.43192e+06	3.47682e+06	3.79458e+06	3.34992e+06	3.1485e+06
ENSGMOP00000003316	5	5	695.865	0.310986	1.09271	2	0,5	pep:known genescaffold:gadMor1:GeneScaffold_1617:25385:26145:1 gene:ENSGMOG00000003063 transcript:ENSGMOT00000003418 gene_biotype:protein_coding transcript_biotype:protein_coding	1.83713e+06	1.5766e+06	2.16847e+06	2.14408e+06	2.0722e+06	1.65507e+06	2.00501e+06	2.04528e+06	1.68736e+06	1.90135e+06	2.00839e+06	1.61443e+06	2.06841e+06	1.95957e+06	1.97821e+06	1.53627e+06	2.25072e+06	2.12735e+06	2.16346e+06	1.96119e+06	1.78784e+06	1.71815e+06	1.46976e+06	1.61355e+06	1.7708e+06	1.99084e+06	1.68314e+06	2.20918e+06
ENSGMOP00000014015	5	4	794.266	0.419134	1.09153	Kontrol	2	pep:known_by_projection genescaffold:gadMor1:GeneScaffold_3761:410552:417535:-1 gene:ENSGMOG00000013112 transcript:ENSGMOT00000014378 gene_biotype:protein_coding transcript_biotype:protein_coding	3.77341e+06	3.09274e+06	3.84658e+06	3.37935e+06	3.54764e+06	2.78367e+06	2.42558e+06	3.02847e+06	3.28764e+06	2.81742e+06	3.49829e+06	3.41574e+06	2.39409e+06	2.63498e+06	2.59103e+06	3.40224e+06	2.35178e+06	3.26223e+06	2.82019e+06	3.76309e+06	2.79813e+06	3.10567e+06	3.08838e+06	2.46728e+06	3.80805e+06	2.71826e+06	2.33589e+06	2.65745e+06
ENSGMOP00000007081	18	8	2195.04	0.430195	1.10029	0,5	Kontrol	pep:known_by_projection genescaffold:gadMor1:GeneScaffold_669:175187:193015:1 gene:ENSGMOG00000006655 transcript:ENSGMOT00000007284 gene_biotype:protein_coding transcript_biotype:protein_coding	3.27477e+06	4.10466e+06	2.82733e+06	4.17932e+06	4.23614e+06	3.61772e+06	4.10236e+06	3.98079e+06	3.88648e+06	2.52064e+06	3.69791e+06	3.93497e+06	4.31814e+06	3.92788e+06	4.33223e+06	4.20591e+06	4.50292e+06	3.09415e+06	4.14512e+06	3.29894e+06	5.64884e+06	4.97673e+06	3.65729e+06	4.62772e+06	2.84358e+06	4.14627e+06	3.97851e+06	3.19464e+06
ENSGMOP00000010682	1	1	100	0.578563	1.24969	Kontrol	0,5	pep:known_by_projection genescaffold:gadMor1:GeneScaffold_3719:46854:60595:1 gene:ENSGMOG00000009978 transcript:ENSGMOT00000010978 gene_biotype:protein_coding transcript_biotype:protein_coding	34517.5	135704	63524.8	98720.7	117650	114761	41384.4	73413.4	46631	198533	22751.1	102275	49455	124754	82006.3	61793.5	84470.9	100105	66507.4	30641.3	36613.8	126357	168172	43674.9	47367.3	87786.6	23776.9	101658
ENSGMOP00000013533	3	1	300	0.573318	1.20256	0,5	Kontrol	pep:known_by_projection genescaffold:gadMor1:GeneScaffold_1579:1378155:1380352:-1 gene:ENSGMOG00000012646 transcript:ENSGMOT00000013890 gene_biotype:protein_coding transcript_biotype:protein_coding	240051	230645	83521.1	220866	217426	165361	263902	134251	199205	74960.3	119334	293273	280458	226452	263431	226238	150237	96240.4	109800	119293	365631	290560	164666	248548	142599	176038	199040	274440
ENSGMOP00000003138	8	7	897.141	0.560338	1.09813	0,5	Kontrol	pep:known_by_projection genescaffold:gadMor1:GeneScaffold_565:59922:63430:-1 gene:ENSGMOG00000002841 transcript:ENSGMOT00000003236 gene_biotype:protein_coding transcript_biotype:protein_coding	702451	481724	627523	736194	584482	626848	835599	835335	679227	603827	583591	829204	747183	558426	798833	712745	811519	629921	727523	891845	739604	694461	566262	810275	492775	755069	992028	692437
ENSGMOP00000014805	13	11	1891.64	0.439352	1.21138	Kontrol	2	pep:known_by_projection genescaffold:gadMor1:GeneScaffold_4633:154504:156922:1 gene:ENSGMOG00000013862 transcript:ENSGMOT00000015186 gene_biotype:protein_coding transcript_biotype:protein_coding	1.29915e+08	1.28211e+08	1.47744e+08	1.09425e+08	8.76595e+07	1.31768e+08	9.12554e+07	1.08911e+08	9.47141e+07	2.74134e+08	1.25937e+08	4.35723e+07	1.29394e+08	1.3145e+08	8.91311e+07	9.9362e+07	1.0615e+08	1.22074e+08	1.21546e+08	1.02373e+08	8.65177e+07	1.36913e+08	1.75449e+08	6.95532e+07	1.16372e+08	1.3825e+08	7.71975e+07	8.47511e+07
ENSGMOP00000008839	31	2	4178.13	0.0027174	1.33942	Kontrol	2	pep:known genescaffold:gadMor1:GeneScaffold_2352:27034:30833:1 gene:ENSGMOG00000008267 transcript:ENSGMOT00000009084 gene_biotype:protein_coding transcript_biotype:protein_coding	549864	757468	752383	606392	641877	745286	617656	781943	764344	631932	280563	538728	553872	559611	534006	644670	520166	404533	566022	636793	776144	627532	567100	645332	576622	479245	723709	636434
ENSGMOP00000013245	4	1	499.996	0.585524	1.34006	0,5	Kontrol	pep:known_by_projection genescaffold:gadMor1:GeneScaffold_52:98500:106383:1 gene:ENSGMOG00000012373 transcript:ENSGMOT00000013596 gene_biotype:protein_coding transcript_biotype:protein_coding	106303	101406	31006.4	81200.4	122060	55180.3	92599.4	95016.7	84917.3	29873	41202.1	67590.1	158927	166630	126492	124563	53832.6	53157.1	48391.8	27000.5	122858	78670.2	68715.8	188398	109588	135165	158996	74927.2
ENSGMOP00000005544	1	1	195.138	0.0512093	1.47151	2	Kontrol	pep:known_by_projection genescaffold:gadMor1:GeneScaffold_4076:103657:111661:-1 gene:ENSGMOG00000005229 transcript:ENSGMOT00000005710 gene_biotype:protein_coding transcript_biotype:protein_coding	273920	227814	113564	146941	237271	190356	145097	340215	182977	105248	199650	235550	394333	304385	362062	381719	174738	291686	256126	146176	228559	159091	243359	313910	190691	315684	355567	126280
ENSGMOP00000013463	4	4	399.94	0.384319	1.31533	2	0,5	pep:known_by_projection genescaffold:gadMor1:GeneScaffold_4648:309223:312698:-1 gene:ENSGMOG00000012585 transcript:ENSGMOT00000013819 gene_biotype:protein_coding transcript_biotype:protein_coding	274415	450792	498296	373675	856964	614435	424241	524704	426242	595874	300219	854842	465878	782876	612345	504541	868365	323002	286790	362558	333172	585688	490154	352674	324593	313136	636736	401740
ENSGMOP00000005222	8	8	1274.95	0.180998	1.07271	Kontrol	2	pep:known_by_projection genescaffold:gadMor1:GeneScaffold_1722:298131:306070:1 gene:ENSGMOG00000004930 transcript:ENSGMOT00000005379 gene_biotype:protein_coding transcript_biotype:protein_coding	1.74541e+06	1.5901e+06	1.59762e+06	1.76405e+06	1.65391e+06	1.63115e+06	1.67706e+06	1.85976e+06	1.49666e+06	1.4547e+06	1.51523e+06	1.73829e+06	1.49068e+06	1.39217e+06	1.6334e+06	1.60261e+06	1.66755e+06	1.38785e+06	1.39086e+06	1.62817e+06	1.80015e+06	1.62512e+06	1.66964e+06	1.62122e+06	1.51343e+06	1.44881e+06	1.35604e+06	1.60576e+06
ENSGMOP00000015820	2	2	200	0.316636	1.53623	2	Kontrol	pep:known_by_projection genescaffold:gadMor1:GeneScaffold_4068:20254:24033:1 gene:ENSGMOG00000014767 transcript:ENSGMOT00000016224 gene_biotype:protein_coding transcript_biotype:protein_coding	38326.6	35759.3	20462.2	13621.3	46263.4	14628.5	19697.8	16546.7	10238.4	13426.1	10562.4	14500	60721.5	64987.9	40047.8	39309.9	16911.3	41266.9	28268.8	8733.08	28041.8	19807.8	25943.1	48304.7	22172.9	36041.5	48709.6	26685
ENSGMOP00000012549	1	1	100	0.417386	1.20297	0,5	2	pep:known_by_projection genescaffold:gadMor1:GeneScaffold_2630:36309:43358:-1 gene:ENSGMOG00000011737 transcript:ENSGMOT00000012880 gene_biotype:protein_coding transcript_biotype:protein_coding	72002	48544.9	33960.9	52615.5	65094.3	40898	52336	37641.9	42312.8	14884.7	30944	74554.1	32965.9	48065.1	66029	39166.1	42046.1	26160.9	31199.3	38271.7	53616.8	64729.6	33484.5	44619.9	43932.9	60286.8	68883.6	62691.2
ENSGMOP00000012698	2	1	399.342	0.482158	1.48077	0,5	Kontrol	pep:known_by_projection genescaffold:gadMor1:GeneScaffold_3080:223277:232228:-1 gene:ENSGMOG00000011875 transcript:ENSGMOT00000013034 gene_biotype:protein_coding transcript_biotype:protein_coding	23793.7	17197.9	14548.5	12314.6	35318.8	12670.9	6112.34	11630.7	9319.9	5690.16	13583.6	4797.68	41063.4	32788.3	25455.4	31563.9	6853.9	23202.5	18341.2	9324.62	37316.8	16411.9	27908.8	40272.9	18597.9	15465.9	29319.7	3415.85
ENSGMOP00000020694	2	1	200	0.142296	1.26884	2	Kontrol	pep:known_by_projection genescaffold:gadMor1:GeneScaffold_2889:131295:136669:-1 gene:ENSGMOG00000019234 transcript:ENSGMOT00000021200 gene_biotype:protein_coding transcript_biotype:protein_coding	49877.3	109497	50862.6	122369	91503	99141	108111	55977.8	107991	96125.2	102166	140910	123184	132872	94284.4	98714.5	106878	95736.5	123253	85778	55094.1	81269.4	74322	85090.8	132088	146162	124691	136679
ENSGMOP00000012728;ENSGMOP00000012732;ENSGMOP00000012735;ENSGMOP00000012739;ENSGMOP00000012744;ENSGMOP00000012749	6	5	699.991	0.407057	1.16928	0,5	2	pep:known_by_projection genescaffold:gadMor1:GeneScaffold_4488:55947:68577:-1 gene:ENSGMOG00000011894 transcript:ENSGMOT00000013064 gene_biotype:protein_coding transcript_biotype:protein_coding	811768	692377	1.42087e+06	640582	907334	747417	905647	1.37662e+06	371126	595705	1.03041e+06	953267	754754	853807	736330	648117	582929	706698	695853	826322	1.07399e+06	922640	741058	1.04998e+06	911645	973121	776408	865579
ENSGMOP00000008029	19	17	2774.62	0.252583	1.16798	0,5	2	pep:known_by_projection genescaffold:gadMor1:GeneScaffold_1288:812077:817451:-1 gene:ENSGMOG00000007507 transcript:ENSGMOT00000008260 gene_biotype:protein_coding transcript_biotype:protein_coding	8.89068e+06	8.24873e+06	5.37083e+06	9.72708e+06	8.59222e+06	7.75257e+06	1.01896e+07	8.14207e+06	8.49688e+06	6.01433e+06	5.58794e+06	8.86812e+06	8.93329e+06	9.10693e+06	8.84991e+06	8.10752e+06	6.76243e+06	6.73063e+06	5.77281e+06	6.18626e+06	1.01147e+07	1.09354e+07	7.04044e+06	1.07639e+07	8.69759e+06	8.2268e+06	8.92477e+06	9.37307e+06
ENSGMOP00000002381	2	2	200	0.550493	1.24446	Kontrol	2	pep:known_by_projection genescaffold:gadMor1:GeneScaffold_3335:96172:98509:-1 gene:ENSGMOG00000002232 transcript:ENSGMOT00000002461 gene_biotype:protein_coding transcript_biotype:protein_coding	143680	170985	129564	90145.9	112998	211673	109181	90309.5	89496.1	360273	144128	68229	124401	140750	87836	87868.2	109318	157237	171046	106743	57394.6	140761	296103	99792.5	104012	105055	104785	99260.6
ENSGMOP00000003610	5	4	499.64	0.131731	1.18035	2	Kontrol	pep:known_by_projection genescaffold:gadMor1:GeneScaffold_177:7922:50120:-1 gene:ENSGMOG00000003330 transcript:ENSGMOT00000003718 gene_biotype:protein_coding transcript_biotype:protein_coding	380459	356326	327509	358814	306355	326275	282541	374103	320150	196656	429952	436547	281420	314679	421847	456391	382273	374198	333092	417746	345210	458921	335556	316428	361323	337599	263106	311057
ENSGMOP00000003152	9	9	999.371	0.260712	1.06229	Kontrol	2	pep:known_by_projection genescaffold:gadMor1:GeneScaffold_2562:273170:275561:-1 gene:ENSGMOG00000002995 transcript:ENSGMOT00000003250 gene_biotype:protein_coding transcript_biotype:protein_coding	2.42551e+06	2.46459e+06	2.76252e+06	2.79093e+06	2.50327e+06	2.51787e+06	2.63362e+06	2.81616e+06	2.50893e+06	2.33344e+06	2.11294e+06	2.5167e+06	2.28572e+06	2.44062e+06	2.21593e+06	2.4553e+06	2.65058e+06	2.67286e+06	2.47128e+06	2.55096e+06	2.25003e+06	2.78862e+06	2.34855e+06	2.27688e+06	2.72343e+06	2.2218e+06	2.38397e+06	2.82837e+06
ENSGMOP00000005189	2	1	199.623	0.125564	1.21838	Kontrol	2	pep:known_by_projection genescaffold:gadMor1:GeneScaffold_4288:84494:94922:-1 gene:ENSGMOG00000004896 transcript:ENSGMOT00000005344 gene_biotype:protein_coding transcript_biotype:protein_coding	312823	257296	379998	300834	272448	255056	356144	445768	359170	297624	271883	166434	242745	284421	279248	269890	271678	320322	284627	280289	323512	263791	223727	409293	353411	215397	369117	236208
ENSGMOP00000006968	1	1	100	0.571969	1.0816	Kontrol	0,5	pep:known_by_projection genescaffold:gadMor1:GeneScaffold_1786:106851:112840:1 gene:ENSGMOG00000006555 transcript:ENSGMOT00000007169 gene_biotype:protein_coding transcript_biotype:protein_coding	156360	144285	151514	165774	162159	146701	208705	170011	142966	133919	94909.7	224690	118854	142161	156213	144250	171515	151128	149850	105000	115114	132219	129339	197905	165337	126386	163503	181910
ENSGMOP00000017872	3	2	300	0.544651	1.34989	2	Kontrol	pep:known_by_projection genescaffold:gadMor1:GeneScaffold_911:244:2357:-1 gene:ENSGMOG00000016654 transcript:ENSGMOT00000018311 gene_biotype:protein_coding transcript_biotype:protein_coding	272221	349638	144410	258860	329787	389496	268324	107973	374347	306436	551627	566330	525572	379791	124311	102624	244660	494966	413663	421440	155584	483313	349824	310583	499160	661798	150881	318751
ENSGMOP00000015826	10	10	1293.82	0.153158	1.25368	2	Kontrol	pep:known_by_projection genescaffold:gadMor1:GeneScaffold_3009:13577:29080:-1 gene:ENSGMOG00000014770 transcript:ENSGMOT00000016230 gene_biotype:protein_coding transcript_biotype:protein_coding	1.95449e+06	2.36653e+06	2.63013e+06	3.30628e+06	2.51647e+06	2.65315e+06	3.10213e+06	3.30959e+06	3.39132e+06	3.46482e+06	4.01794e+06	2.42254e+06	3.60507e+06	3.86463e+06	2.82331e+06	3.36788e+06	4.17291e+06	4.58862e+06	3.51397e+06	3.21011e+06	3.2649e+06	2.70722e+06	1.71716e+06	2.82337e+06	3.12625e+06	3.381e+06	3.68622e+06	5.96398e+06
ENSGMOP00000020424	4	3	492.553	0.42293	1.0751	2	0,5	pep:known_by_projection genescaffold:gadMor1:GeneScaffold_3420:47166:47969:-1 gene:ENSGMOG00000018985 transcript:ENSGMOT00000020925 gene_biotype:protein_coding transcript_biotype:protein_coding	320815	401880	294246	415156	365150	393445	396378	290606	339088	347975	337410	442559	362151	306254	402462	338465	363408	338411	362772	390587	257498	381668	390961	302112	319656	350580	297700	335838
ENSGMOP00000017514	2	2	300	0.295304	1.21432	Kontrol	2	pep:known_by_projection genescaffold:gadMor1:GeneScaffold_1780:1269316:1272295:-1 gene:ENSGMOG00000016331 transcript:ENSGMOT00000017946 gene_biotype:protein_coding transcript_biotype:protein_coding	396039	513027	303082	258505	336324	465994	280264	352225	275320	338444	254777	150442	452218	268994	342481	311355	332014	168201	327814	213327	344195	303778	501969	356696	328106	265563	340131	155110
ENSGMOP00000008199	26	21	3877.01	0.339772	1.14566	Kontrol	2	pep:known_by_projection genescaffold:gadMor1:GeneScaffold_4654:5177:11333:-1 gene:ENSGMOG00000007666 transcript:ENSGMOT00000008433 gene_biotype:protein_coding transcript_biotype:protein_coding	1.57029e+07	1.51595e+07	2.17669e+07	1.57851e+07	1.70183e+07	1.49916e+07	1.95084e+07	2.42752e+07	1.48334e+07	1.22533e+07	1.82869e+07	1.08692e+07	1.45745e+07	1.70156e+07	1.36594e+07	1.63296e+07	1.48013e+07	1.31361e+07	1.58917e+07	1.53646e+07	2.11875e+07	1.69499e+07	1.2821e+07	1.89049e+07	1.31615e+07	1.56088e+07	1.62263e+07	1.08549e+07
ENSGMOP00000012827	7	7	694.513	0.560066	1.06969	0,5	Kontrol	pep:known_by_projection genescaffold:gadMor1:GeneScaffold_4591:90753:94470:-1 gene:ENSGMOG00000011990 transcript:ENSGMOT00000013166 gene_biotype:protein_coding transcript_biotype:protein_coding	1.97143e+06	1.89342e+06	2.0375e+06	2.14195e+06	2.09482e+06	1.9417e+06	2.45805e+06	2.22293e+06	2.05432e+06	1.30928e+06	2.12349e+06	2.93548e+06	2.06161e+06	1.85883e+06	2.34195e+06	2.01389e+06	2.40671e+06	1.6973e+06	1.82384e+06	2.24031e+06	2.5162e+06	2.22496e+06	1.75414e+06	2.21724e+06	1.77515e+06	2.43001e+06	2.23367e+06	1.98339e+06
ENSGMOP00000002234	4	4	791.448	0.604828	1.08226	0,5	Kontrol	pep:novel genescaffold:gadMor1:GeneScaffold_1587:24419:27557:-1 gene:ENSGMOG00000002093 transcript:ENSGMOT00000002307 gene_biotype:protein_coding transcript_biotype:protein_coding	2.36164e+06	2.84586e+06	1.39169e+06	2.83501e+06	3.0109e+06	2.87822e+06	3.31277e+06	1.83257e+06	2.92479e+06	2.04679e+06	2.84861e+06	3.93628e+06	2.67375e+06	2.51778e+06	2.04941e+06	2.11371e+06	2.44283e+06	2.2341e+06	2.61695e+06	2.9702e+06	2.4109e+06	3.61948e+06	2.55431e+06	2.94658e+06	2.59234e+06	3.01723e+06	2.19458e+06	2.47409e+06
ENSGMOP00000016277	3	3	398.601	0.241548	1.19538	0,5	2	pep:known_by_projection genescaffold:gadMor1:GeneScaffold_733:237565:239907:1 gene:ENSGMOG00000015217 transcript:ENSGMOT00000016692 gene_biotype:protein_coding transcript_biotype:protein_coding	409080	285026	604738	512936	380244	482686	504127	545882	508524	434023	518527	426170	471058	286272	509369	413304	407518	397969	449371	847964	563917	508359	507647	470490	435785	421827	470285	411281
ENSGMOP00000011549	1	1	95.0511	0.290938	1.14853	2	Kontrol	pep:known_by_projection genescaffold:gadMor1:GeneScaffold_2494:69545:70146:-1 gene:ENSGMOG00000010799 transcript:ENSGMOT00000011863 gene_biotype:protein_coding transcript_biotype:protein_coding	194102	156948	89943.3	193654	196342	165177	184903	116374	181319	122495	165327	298822	161945	164555	160975	157666	182735	192748	170415	169937	173384	171291	154847	180847	155973	153269	198994	182269
ENSGMOP00000000868	1	1	200	2.26677e-05	1.96453	2	Kontrol	pep:known_by_projection genescaffold:gadMor1:GeneScaffold_964:501:26066:-1 gene:ENSGMOG00000000840 transcript:ENSGMOT00000000903 gene_biotype:protein_coding transcript_biotype:protein_coding	154586	199711	150882	173395	146322	250534	152811	231158	212290	176216	427263	219409	320323	414459	404389	295535	372968	493423	319475	181616	173390	119055	345455	193014	158961	210412	331454	230555
ENSGMOP00000002343	25	22	3292.06	0.0211994	1.32661	Kontrol	2	pep:known_by_projection genescaffold:gadMor1:GeneScaffold_2296:1013618:1098320:1 gene:ENSGMOG00000002187 transcript:ENSGMOT00000002421 gene_biotype:protein_coding transcript_biotype:protein_coding	5.49461e+06	4.24043e+06	8.89799e+06	6.10373e+06	6.86246e+06	7.19992e+06	7.84277e+06	5.95522e+06	6.51132e+06	6.7468e+06	3.67984e+06	4.51635e+06	4.89427e+06	4.52024e+06	6.17209e+06	5.21618e+06	4.11436e+06	4.10174e+06	7.46249e+06	6.87188e+06	4.69077e+06	4.98985e+06	4.81805e+06	7.83233e+06	4.56999e+06	6.19903e+06	6.68872e+06	7.23254e+06
ENSGMOP00000011679	4	3	594.715	0.533239	1.06256	0,5	Kontrol	pep:known_by_projection contig::contig54667:4:2381:-1 gene:ENSGMOG00000010931 transcript:ENSGMOT00000011995 gene_biotype:protein_coding transcript_biotype:protein_coding	892273	927065	753834	1.48115e+06	1.05714e+06	1.19667e+06	1.12242e+06	971827	1.10389e+06	761800	859252	1.23193e+06	1.25444e+06	980965	1.07869e+06	960379	1.14113e+06	1.21929e+06	1.06765e+06	1.09723e+06	1.23219e+06	1.25986e+06	885744	1.10558e+06	1.04343e+06	894559	1.14699e+06	1.15383e+06
ENSGMOP00000010716	2	1	288.931	0.00405463	1.28966	Kontrol	2	pep:known_by_projection genescaffold:gadMor1:GeneScaffold_4084:64042:76510:1 gene:ENSGMOG00000010030 transcript:ENSGMOT00000011013 gene_biotype:protein_coding transcript_biotype:protein_coding	90092.6	121765	109648	97682.3	95840.5	100018	70526.6	98138.1	76163.1	93772	68349.1	74384.3	64779.4	64765.9	80918.3	92056.5	88070	65417.5	66769.7	105552	88058.2	106522	89872.4	78600.3	99933.7	89940.7	72171.1	69917.8
ENSGMOP00000017542	1	1	99.9399	0.298038	1.11131	2	0,5	pep:known_by_projection genescaffold:gadMor1:GeneScaffold_790:7303:19269:-1 gene:ENSGMOG00000016344 transcript:ENSGMOT00000017974 gene_biotype:protein_coding transcript_biotype:protein_coding	120856	161444	122566	154890	138733	164452	132624	133587	123801	157333	159335	160201	144335	117910	162702	159658	165023	139284	120441	140661	147262	129635	156376	147310	105949	85856.2	120573	162169
ENSGMOP00000008324	1	1	189.721	0.440809	1.15606	2	Kontrol	pep:known_by_projection genescaffold:gadMor1:GeneScaffold_4029:392767:424349:-1 gene:ENSGMOG00000007787 transcript:ENSGMOT00000008559 gene_biotype:protein_coding transcript_biotype:protein_coding	262568	440301	27918.2	729142	400049	1.06207e+06	921463	350477	646615	593451	272055	790903	892721	518553	702064	433107	808532	519760	716175	616054	367973	770968	519793	418583	447570	577512	558444	887579
ENSGMOP00000020569	1	1	100	0.034828	1.50751	2	Kontrol	pep:known_by_projection genescaffold:gadMor1:GeneScaffold_2632:52000:60703:1 gene:ENSGMOG00000019118 transcript:ENSGMOT00000021071 gene_biotype:protein_coding transcript_biotype:protein_coding	60254.1	61414.9	34303.3	41566.7	62789.8	46710.7	24122.6	44223	36136.4	32490.5	60033.8	42866.4	86126.9	86385.8	73017.2	91406.4	44230.2	53954.9	64395.4	28391.6	48874.5	42000.9	57357.3	68948.8	62459.7	58615.2	80067.5	26000.1
ENSGMOP00000018383	2	2	200	0.301679	1.10046	Kontrol	2	pep:known_by_projection genescaffold:gadMor1:GeneScaffold_2090:22230:39781:-1 gene:ENSGMOG00000017101 transcript:ENSGMOT00000018834 gene_biotype:protein_coding transcript_biotype:protein_coding	293398	263595	260012	261353	287312	270011	219494	339762	253438	306524	223419	207205	283645	299508	225315	278179	253001	266365	216426	196763	283962	206037	265439	278140	313570	280568	269494	246482
ENSGMOP00000020304	3	3	298.014	0.5427	1.06325	Kontrol	0,5	pep:known_by_projection genescaffold:gadMor1:GeneScaffold_1947:36860:37572:-1 gene:ENSGMOG00000018905 transcript:ENSGMOT00000020804 gene_biotype:protein_coding transcript_biotype:protein_coding	278709	368853	250708	311113	300622	320123	270136	332070	239852	266646	306427	335983	298880	263949	264205	339814	314625	289701	229140	264366	259409	323391	406505	262660	322111	172880	260748	215531
ENSGMOP00000003626	17	15	2987.06	0.476327	1.06339	0,5	2	pep:known_by_projection genescaffold:gadMor1:GeneScaffold_4565:96470:105016:1 gene:ENSGMOG00000003426 transcript:ENSGMOT00000003735 gene_biotype:protein_coding transcript_biotype:protein_coding	1.46137e+07	1.64894e+07	2.04014e+07	1.99756e+07	1.62905e+07	1.79624e+07	1.84451e+07	1.97666e+07	2.05285e+07	1.76159e+07	2.13593e+07	1.43049e+07	1.71502e+07	2.0546e+07	1.75413e+07	1.67407e+07	1.91482e+07	1.53524e+07	2.04419e+07	2.3589e+07	2.05923e+07	1.7852e+07	1.70134e+07	1.91781e+07	1.69583e+07	1.93197e+07	2.03961e+07	1.79927e+07
ENSGMOP00000002804	2	2	200	0.0679883	1.56669	Kontrol	2	pep:known_by_projection genescaffold:gadMor1:GeneScaffold_1834:19452:23139:-1 gene:ENSGMOG00000002670 transcript:ENSGMOT00000002895 gene_biotype:protein_coding transcript_biotype:protein_coding	103316	124102	199106	143992	127092	105265	126795	180110	123910	145905	112812	89870.1	94886.4	98886.6	58206.7	115131	124970	75957.5	21800.6	150592	99247.4	231275	66850.2	153074	149267	30541.4	111103	125002
ENSGMOP00000005118	22	22	3364.68	0.46173	1.10238	Kontrol	2	pep:known_by_projection genescaffold:gadMor1:GeneScaffold_1011:35200:42551:-1 gene:ENSGMOG00000004833 transcript:ENSGMOT00000005267 gene_biotype:protein_coding transcript_biotype:protein_coding	1.44361e+07	1.19391e+07	1.64023e+07	1.3614e+07	1.32094e+07	1.54207e+07	1.70752e+07	1.55878e+07	1.46408e+07	9.78333e+06	1.32103e+07	1.43406e+07	1.34352e+07	9.52609e+06	1.35001e+07	1.36715e+07	1.51771e+07	1.10103e+07	1.21484e+07	1.62391e+07	1.74626e+07	1.37693e+07	1.41443e+07	1.22991e+07	1.13957e+07	8.3306e+06	1.28822e+07	1.25525e+07
ENSGMOP00000020051	2	2	300	0.335036	1.10594	2	0,5	pep:known_by_projection genescaffold:gadMor1:GeneScaffold_3291:25602:27118:-1 gene:ENSGMOG00000018660 transcript:ENSGMOT00000020545 gene_biotype:protein_coding transcript_biotype:protein_coding	1.63884e+06	1.55722e+06	1.33571e+06	1.68991e+06	1.90411e+06	1.54014e+06	1.57286e+06	1.36172e+06	1.78733e+06	1.25648e+06	1.27958e+06	2.10915e+06	1.56078e+06	1.36766e+06	1.57805e+06	1.67952e+06	1.78282e+06	1.82623e+06	1.43972e+06	1.67254e+06	1.30529e+06	1.49063e+06	1.42368e+06	1.51675e+06	1.16068e+06	1.57571e+06	1.38193e+06	1.69544e+06
ENSGMOP00000011391	3	2	299.88	0.576786	1.10631	2	0,5	pep:novel genescaffold:gadMor1:GeneScaffold_2329:7:707:-1 gene:ENSGMOG00000010643 transcript:ENSGMOT00000011701 gene_biotype:protein_coding transcript_biotype:protein_coding	186135	119342	133881	138275	182240	208244	200773	219234	192849	143309	98557.5	147827	142592	263065	156276	130652	208777	212163	201959	77955.9	171629	87866.3	120974	244399	167421	170882	224919	145732
ENSGMOP00000008676	22	20	3596.11	0.469788	1.10242	2	Kontrol	pep:known_by_projection genescaffold:gadMor1:GeneScaffold_1148:149014:153980:-1 gene:ENSGMOG00000008106 transcript:ENSGMOT00000008919 gene_biotype:protein_coding transcript_biotype:protein_coding	1.76947e+07	1.62922e+07	2.09771e+07	2.23583e+07	2.29023e+07	2.03768e+07	2.08068e+07	2.35616e+07	2.24194e+07	1.80061e+07	2.40108e+07	2.07986e+07	2.43853e+07	2.68768e+07	2.38346e+07	1.40648e+07	2.14245e+07	2.43345e+07	2.40597e+07	2.08349e+07	2.84344e+07	2.17896e+07	1.42436e+07	2.13576e+07	2.30405e+07	2.66745e+07	2.32377e+07	2.16305e+07
ENSGMOP00000015803	2	2	199.731	0.463742	1.08751	Kontrol	2	pep:known_by_projection genescaffold:gadMor1:GeneScaffold_4314:6138:21180:1 gene:ENSGMOG00000014753 transcript:ENSGMOT00000016206 gene_biotype:protein_coding transcript_biotype:protein_coding	195021	177946	183243	174513	176211	151831	129655	201550	153518	139872	149123	206267	122523	133428	172917	170190	149648	151215	137803	213715	161515	150964	158404	143609	183899	112808	137317	155585
ENSGMOP00000015067	2	1	198.116	0.515376	1.15005	Kontrol	2	pep:known_by_projection genescaffold:gadMor1:GeneScaffold_1620:15927:28207:1 gene:ENSGMOG00000014089 transcript:ENSGMOT00000015454 gene_biotype:protein_coding transcript_biotype:protein_coding	123167	119121	109887	56245.1	117025	135896	120844	110163	70610.6	82041.5	90514.1	71249.7	84316	107040	133082	92998.5	48146.3	79394.7	111050	104993	131098	90783.3	113664	124586	81340.4	59627.9	53208.5	72461.4
ENSGMOP00000002621	2	1	300	0.482298	1.09337	Kontrol	2	pep:known_by_projection genescaffold:gadMor1:GeneScaffold_264:7593:25791:-1 gene:ENSGMOG00000002469 transcript:ENSGMOT00000002706 gene_biotype:protein_coding transcript_biotype:protein_coding	58743.1	64539.5	42581.8	52664	54186.5	54947.9	52327.8	70651.2	48099.8	50969.4	46978.3	52928.3	54712.6	49876.1	58688.1	61201.3	51032.8	39988.2	37083.7	44517.7	49370.9	58391.8	57238.3	60597	69048.7	46015.7	43977.1	33344.7
ENSGMOP00000006290	20	18	3278.53	0.59496	1.07181	0,5	Kontrol	pep:known_by_projection genescaffold:gadMor1:GeneScaffold_1260:1283606:1291424:-1 gene:ENSGMOG00000005912 transcript:ENSGMOT00000006471 gene_biotype:protein_coding transcript_biotype:protein_coding	1.81942e+07	1.10942e+07	1.94079e+07	1.62434e+07	1.23161e+07	1.79635e+07	1.76801e+07	2.1087e+07	2.01504e+07	2.05299e+07	2.1858e+07	1.2333e+07	1.65338e+07	1.60125e+07	1.80913e+07	1.40346e+07	1.72782e+07	2.41653e+07	1.85875e+07	2.07877e+07	2.04456e+07	1.91767e+07	1.73099e+07	1.5298e+07	2.25278e+07	1.75277e+07	1.80112e+07	1.74034e+07
ENSGMOP00000015972	6	6	699.298	0.100934	1.20558	2	Kontrol	pep:known_by_projection genescaffold:gadMor1:GeneScaffold_4241:41370:43281:1 gene:ENSGMOG00000014916 transcript:ENSGMOT00000016380 gene_biotype:protein_coding transcript_biotype:protein_coding	3.92084e+06	3.52085e+06	4.59817e+06	3.96916e+06	3.59742e+06	3.27953e+06	5.07176e+06	3.90168e+06	4.04938e+06	4.6087e+06	4.88482e+06	6.51199e+06	4.23849e+06	4.37915e+06	4.32749e+06	4.03664e+06	4.84595e+06	6.24719e+06	4.4906e+06	5.10457e+06	3.87852e+06	3.97111e+06	3.81716e+06	3.63685e+06	3.19393e+06	5.29449e+06	4.67424e+06	6.38989e+06
ENSGMOP00000003012	4	2	587.789	0.156047	1.25524	Kontrol	2	pep:known_by_projection genescaffold:gadMor1:GeneScaffold_1098:60551:63346:-1 gene:ENSGMOG00000002868 transcript:ENSGMOT00000003108 gene_biotype:protein_coding transcript_biotype:protein_coding	158109	167994	321696	140187	195670	165141	146444	219793	140771	184642	126705	123290	140271	162796	163947	203523	161971	98751.4	138338	186813	248595	193366	158611	150554	155964	119526	151517	119247
ENSGMOP00000008238	3	3	398.762	0.172745	1.35528	Kontrol	2	pep:known_by_projection genescaffold:gadMor1:GeneScaffold_2538:793640:798069:-1 gene:ENSGMOG00000007701 transcript:ENSGMOT00000008472 gene_biotype:protein_coding transcript_biotype:protein_coding	638382	846743	1.7416e+06	717286	788563	624356	542214	1.01581e+06	790382	538036	665652	639855	482775	623009	641301	568639	660516	611266	581174	556891	816940	813419	601967	793996	1.27049e+06	522972	597355	484247
ENSGMOP00000006159	9	9	1097.63	0.0119907	1.29921	Kontrol	2	pep:known_by_projection genescaffold:gadMor1:GeneScaffold_3537:35552:48439:1 gene:ENSGMOG00000005792 transcript:ENSGMOT00000006335 gene_biotype:protein_coding transcript_biotype:protein_coding	2.60464e+06	1.91207e+06	3.54762e+06	2.4047e+06	2.6375e+06	2.28268e+06	2.32863e+06	2.65405e+06	3.0099e+06	1.94697e+06	1.55252e+06	1.93981e+06	2.00048e+06	2.08575e+06	1.9058e+06	2.1154e+06	1.20438e+06	2.23868e+06	2.50312e+06	2.97738e+06	2.39984e+06	2.4496e+06	1.84645e+06	2.13917e+06	2.29831e+06	2.24445e+06	2.26899e+06	2.26101e+06
ENSGMOP00000013881	3	3	400	0.642935	1.20512	0,5	Kontrol	pep:known_by_projection genescaffold:gadMor1:GeneScaffold_1139:523:14781:1 gene:ENSGMOG00000012983 transcript:ENSGMOT00000014243 gene_biotype:protein_coding transcript_biotype:protein_coding	706281	829721	716180	904488	848207	879115	965111	743914	795868	1.4245e+06	714255	1.07922e+06	1.14082e+06	738192	825117	877378	943459	935899	1.07695e+06	761564	835103	1.35348e+06	2.49655e+06	1.00149e+06	842178	749841	758162	760696
ENSGMOP00000015769	2	1	199.94	0.464433	1.26528	0,5	2	pep:known_by_projection genescaffold:gadMor1:GeneScaffold_871:42702:49173:1 gene:ENSGMOG00000014736 transcript:ENSGMOT00000016172 gene_biotype:protein_coding transcript_biotype:protein_coding	90002.5	94428.9	84930.6	89605.1	90059.6	73667.2	49741.8	75013.4	52631.4	45321.6	88496.5	69518.7	57711	58134.7	78843	105211	55690	63913	60083	71528.4	88337.9	137135	152945	89311.2	105123	39147.5	62185.9	61026.8
ENSGMOP00000002187	4	1	500	0.627724	1.13535	0,5	2	pep:novel genescaffold:gadMor1:GeneScaffold_3093:63040:73877:-1 gene:ENSGMOG00000002043 transcript:ENSGMOT00000002256 gene_biotype:protein_coding transcript_biotype:protein_coding	319592	705668	322095	798637	462790	1.08161e+06	1.00105e+06	560639	930166	1.36312e+06	532380	628700	589581	926590	706389	561624	723139	1.18305e+06	723660	1.06345e+06	590280	680913	918490	859494	730047	1.21426e+06	473273	934866
ENSGMOP00000017364	17	6	2965.31	0.643349	1.07334	Kontrol	0,5	pep:novel genescaffold:gadMor1:GeneScaffold_4475:83555:87955:1 gene:ENSGMOG00000016183 transcript:ENSGMOT00000017794 gene_biotype:protein_coding transcript_biotype:protein_coding	7.52982e+06	6.5968e+06	1.00318e+07	9.75992e+06	6.78672e+06	6.12847e+06	7.70202e+06	9.6192e+06	9.50926e+06	9.13277e+06	7.21905e+06	8.41957e+06	7.34503e+06	6.29721e+06	7.6227e+06	7.67753e+06	9.10789e+06	8.23846e+06	9.0007e+06	1.17909e+07	7.66292e+06	8.65589e+06	6.60302e+06	6.71462e+06	8.71214e+06	4.69918e+06	6.63713e+06	7.94967e+06
ENSGMOP00000004366;ENSGMOP00000019356	4	1	487.788	0.643505	1.17324	Kontrol	0,5	pep:known_by_projection genescaffold:gadMor1:GeneScaffold_3776:14136:21641:-1 gene:ENSGMOG00000004115 transcript:ENSGMOT00000004499 gene_biotype:protein_coding transcript_biotype:protein_coding	102292	125781	64919.3	77857.6	131370	91165.7	43668.7	93624.9	59128.2	48622.3	83668.2	82637.7	63719	84214	55244.9	119471	48924.6	62947.5	84752.4	48780	80890.2	83392.6	86860.7	56488.3	116820	71848.6	57626.6	40456.7
ENSGMOP00000004812	1	1	100	0.64109	1.09856	Kontrol	0,5	pep:known_by_projection genescaffold:gadMor1:GeneScaffold_1960:321210:329433:1 gene:ENSGMOG00000004535 transcript:ENSGMOT00000004953 gene_biotype:protein_coding transcript_biotype:protein_coding	84779.4	116335	93450.6	124725	102361	79223.1	130790	84308.2	130742	100570	99158.6	52512.3	94293.8	125051	98244.2	98346.5	144137	98738.7	93413.6	64871.3	72019.4	91322.2	84676.5	132601	116177	100038	88855.3	107434
ENSGMOP00000001913	10	8	1497.59	0.631072	1.0677	0,5	Kontrol	pep:known_by_projection genescaffold:gadMor1:GeneScaffold_4216:14358:22034:-1 gene:ENSGMOG00000001796 transcript:ENSGMOT00000001975 gene_biotype:protein_coding transcript_biotype:protein_coding	2.40684e+06	2.36501e+06	2.56702e+06	2.32011e+06	2.52467e+06	2.23498e+06	2.88424e+06	2.06131e+06	2.40513e+06	1.81646e+06	2.99151e+06	3.64214e+06	2.26584e+06	2.07676e+06	2.47577e+06	2.04126e+06	2.68532e+06	2.04477e+06	2.21241e+06	3.11228e+06	2.60761e+06	2.89004e+06	2.20118e+06	2.27924e+06	2.21003e+06	2.52301e+06	2.32267e+06	2.51815e+06
ENSGMOP00000018475;ENSGMOP00000018546;ENSGMOP00000018560;ENSGMOP00000018561	1	1	100	0.495952	2.62735	0,5	2	pep:novel genescaffold:gadMor1:GeneScaffold_4617:256142:259751:1 gene:ENSGMOG00000017193 transcript:ENSGMOT00000018930 gene_biotype:protein_coding transcript_biotype:protein_coding	51191	838.429	30259.9	10286.6	2614.55	6732.06	17467.7	7425.46	121.194	92.936	1964.98	18473.2	1397.23	14845.7	35471	5266.86	1940.01	5.80597	9206.98	8142.25	26437.5	16057.2	1817.2	88663.9	50282.6	39860.3	797.045	651.176
ENSGMOP00000000932	2	2	200	0.00268778	1.5838	Kontrol	2	pep:known_by_projection genescaffold:gadMor1:GeneScaffold_3467:36481:38713:1 gene:ENSGMOG00000000908 transcript:ENSGMOT00000000968 gene_biotype:protein_coding transcript_biotype:protein_coding	501539	387569	486366	447690	476161	340943	307266	576075	444167	416318	347067	279069	197525	232984	240977	362678	297695	254495	278789	477434	484972	479781	432069	434139	635208	287310	241303	200662
ENSGMOP00000006134	48	42	6717.89	0.199778	1.26877	Kontrol	2	pep:known_by_projection genescaffold:gadMor1:GeneScaffold_1537:5984:55534:1 gene:ENSGMOG00000005697 transcript:ENSGMOT00000006310 gene_biotype:protein_coding transcript_biotype:protein_coding	6.83494e+06	8.37066e+06	9.06012e+06	1.30464e+07	7.98262e+06	6.17361e+06	1.31689e+07	1.2778e+07	1.35478e+07	1.03879e+07	1.00557e+07	4.6197e+06	6.31054e+06	8.85196e+06	5.5811e+06	5.24401e+06	1.25386e+07	9.66843e+06	9.0232e+06	1.09315e+07	5.3981e+06	8.68292e+06	7.29029e+06	9.56503e+06	1.1181e+07	1.07554e+07	6.8252e+06	8.63578e+06
ENSGMOP00000015882	2	2	298.761	0.472964	1.20168	Kontrol	0,5	pep:known genescaffold:gadMor1:GeneScaffold_1701:125087:126192:-1 gene:ENSGMOG00000014820 transcript:ENSGMOT00000016287 gene_biotype:protein_coding transcript_biotype:protein_coding	1.17918e+06	649734	487115	1.03196e+06	774981	742345	613393	647926	706884	605290	607341	583917	388741	1.10471e+06	951959	101080	675311	947905	557610	480631	961027	523488	607193	762252	608450	342881	906029	379359
ENSGMOP00000008285	10	10	999.12	0.370233	1.13129	Kontrol	2	pep:known_by_projection genescaffold:gadMor1:GeneScaffold_168:416530:427495:-1 gene:ENSGMOG00000007740 transcript:ENSGMOT00000008520 gene_biotype:protein_coding transcript_biotype:protein_coding	1.41561e+06	1.32975e+06	2.37463e+06	1.5572e+06	1.94756e+06	1.67391e+06	1.3942e+06	1.97262e+06	1.63934e+06	1.25659e+06	1.36415e+06	1.24065e+06	1.59492e+06	1.60394e+06	1.40204e+06	1.39352e+06	1.48412e+06	1.5559e+06	1.53624e+06	1.48872e+06	2.13448e+06	1.41538e+06	1.24159e+06	1.69911e+06	1.65527e+06	1.53558e+06	1.5255e+06	1.12321e+06
ENSGMOP00000011654	13	13	2194.22	0.643552	1.13471	0,5	Kontrol	pep:known_by_projection genescaffold:gadMor1:GeneScaffold_1603:75892:78889:-1 gene:ENSGMOG00000010882 transcript:ENSGMOT00000011970 gene_biotype:protein_coding transcript_biotype:protein_coding	6.83985e+06	6.03708e+06	1.03129e+07	8.54846e+06	6.94003e+06	6.84097e+06	6.36873e+06	1.02168e+07	1.29183e+07	7.03636e+06	1.50774e+07	5.73573e+06	9.86422e+06	8.27325e+06	6.11587e+06	5.65161e+06	7.34877e+06	9.36698e+06	1.11327e+07	7.78539e+06	1.1518e+07	9.2347e+06	4.82422e+06	9.21058e+06	1.31833e+07	9.8666e+06	9.76252e+06	8.41658e+06
ENSGMOP00000020262	8	7	1099.88	0.397578	1.07462	Kontrol	2	pep:known_by_projection genescaffold:gadMor1:GeneScaffold_3450:274:21973:1 gene:ENSGMOG00000018866 transcript:ENSGMOT00000020762 gene_biotype:protein_coding transcript_biotype:protein_coding	8.11878e+06	7.77824e+06	8.53242e+06	9.54368e+06	8.51539e+06	8.60694e+06	8.65679e+06	1.09678e+07	7.60261e+06	7.44696e+06	6.96441e+06	5.76679e+06	7.10391e+06	8.78882e+06	8.06627e+06	9.15148e+06	8.44333e+06	9.27781e+06	8.26969e+06	7.2982e+06	9.07448e+06	7.4632e+06	7.79346e+06	8.44095e+06	8.84371e+06	7.20688e+06	7.8204e+06	9.09914e+06
ENSGMOP00000009594	9	6	1092.11	0.358805	1.10376	Kontrol	2	pep:known_by_projection genescaffold:gadMor1:GeneScaffold_4044:45326:48591:1 gene:ENSGMOG00000008986 transcript:ENSGMOT00000009853 gene_biotype:protein_coding transcript_biotype:protein_coding	2.16757e+06	2.48434e+06	3.32831e+06	3.16747e+06	2.42996e+06	2.4221e+06	1.98074e+06	2.59394e+06	2.07038e+06	2.57635e+06	2.57537e+06	2.2168e+06	2.21549e+06	1.95654e+06	2.02646e+06	2.30847e+06	2.6198e+06	2.14436e+06	2.502e+06	2.43447e+06	2.35077e+06	2.67668e+06	2.84372e+06	1.98745e+06	2.52318e+06	2.40572e+06	1.9337e+06	2.12565e+06
ENSGMOP00000011535	6	3	590.574	0.634657	1.11162	Kontrol	0,5	pep:known_by_projection genescaffold:gadMor1:GeneScaffold_3850:321666:356414:-1 gene:ENSGMOG00000010740 transcript:ENSGMOT00000011849 gene_biotype:protein_coding transcript_biotype:protein_coding	233167	284020	455354	269423	262690	333521	445023	285355	286421	557760	342609	379664	258350	250873	330093	259844	369260	262461	312084	294145	256946	319299	353604	221959	299807	572379	239553	205352
ENSGMOP00000019306	2	2	300	0.63467	1.07403	Kontrol	0,5	pep:known_by_projection genescaffold:gadMor1:GeneScaffold_1797:236783:240373:1 gene:ENSGMOG00000017950 transcript:ENSGMOT00000019774 gene_biotype:protein_coding transcript_biotype:protein_coding	291842	278663	326620	224821	321235	227867	272803	336502	220215	214734	242898	340631	225167	242045	301365	298402	262022	242920	234844	233663	295838	218247	187349	290520	257375	230013	292949	269384
ENSGMOP00000014770	4	4	399.946	0.253013	1.16935	Kontrol	2	pep:known_by_projection genescaffold:gadMor1:GeneScaffold_2124:195216:197437:1 gene:ENSGMOG00000013816 transcript:ENSGMOT00000015150 gene_biotype:protein_coding transcript_biotype:protein_coding	470221	418306	652663	562022	399916	610630	725951	529584	545737	624688	485106	591657	315162	312346	465297	465091	593066	553075	482879	464685	493028	406508	456024	638875	470787	377886	670444	583300
ENSGMOP00000011548	4	4	496.877	0.647924	1.06958	0,5	Kontrol	pep:known_by_projection genescaffold:gadMor1:GeneScaffold_2007:1024712:1027141:1 gene:ENSGMOG00000010791 transcript:ENSGMOT00000011862 gene_biotype:protein_coding transcript_biotype:protein_coding	1.721e+06	1.84404e+06	1.11819e+06	2.64521e+06	2.06856e+06	2.13165e+06	2.84427e+06	2.16151e+06	2.72138e+06	1.78175e+06	2.10063e+06	2.78795e+06	1.86657e+06	1.92057e+06	2.1351e+06	1.77927e+06	2.21392e+06	2.02548e+06	2.22399e+06	2.41996e+06	2.60672e+06	2.63717e+06	1.55239e+06	2.50095e+06	1.99642e+06	2.32204e+06	2.11624e+06	2.09927e+06
ENSGMOP00000008283	3	3	398.492	0.546952	1.087	Kontrol	2	pep:known_by_projection genescaffold:gadMor1:GeneScaffold_4013:103434:109021:1 gene:ENSGMOG00000007742 transcript:ENSGMOT00000008518 gene_biotype:protein_coding transcript_biotype:protein_coding	495372	516687	412267	407437	513521	495263	338005	355118	427891	498585	479571	638128	377315	371829	246351	492283	329317	388209	369843	434967	372420	523130	574388	308647	521814	369587	260385	342178
ENSGMOP00000000615	1	1	100	0.303558	1.30456	2	Kontrol	pep:known_by_projection genescaffold:gadMor1:GeneScaffold_451:71473:85111:-1 gene:ENSGMOG00000000624 transcript:ENSGMOT00000000644 gene_biotype:protein_coding transcript_biotype:protein_coding	68172	67639.7	81410.9	68533.4	56409	59761.8	61422.1	79035.4	44536.1	44984.6	52720.2	193602	72465.4	57968.9	86784.6	72393.5	67256.2	64800.6	73928.7	90870.1	64224	65780.1	61329.2	56632.7	50805.3	113382	63610.1	83173.5
ENSGMOP00000012103	1	1	98.7425	0.0193445	1.20084	2	0,5	pep:known_by_projection genescaffold:gadMor1:GeneScaffold_2180:250041:259780:1 gene:ENSGMOG00000011300 transcript:ENSGMOT00000012429 gene_biotype:protein_coding transcript_biotype:protein_coding	84773.5	89700	61397.6	77260.7	85609.2	91042.5	94432.5	94508.2	78329.6	73442.8	79211.4	89460	96712.6	104811	100958	95706.2	103636	92990.4	88160	58356.1	77986.4	66352.6	77942.6	87760.8	77575.1	68794.6	107161	87278.4
ENSGMOP00000000259	6	5	600	0.604511	1.0648	Kontrol	0,5	pep:known_by_projection genescaffold:gadMor1:GeneScaffold_4166:97334:117937:-1 gene:ENSGMOG00000000251 transcript:ENSGMOT00000000266 gene_biotype:protein_coding transcript_biotype:protein_coding	1.00139e+06	927113	818598	1.17205e+06	897694	751195	690173	828832	856356	889451	1.1769e+06	848243	805624	901929	942493	747559	968687	720342	791803	867474	573384	979170	1.10058e+06	643189	1.02092e+06	886508	530081	864495
ENSGMOP00000016563	32	29	4668.18	0.627285	1.11623	Kontrol	0,5	pep:novel genescaffold:gadMor1:GeneScaffold_2734:68:95543:-1 gene:ENSGMOG00000015403 transcript:ENSGMOT00000016981 gene_biotype:protein_coding transcript_biotype:protein_coding	2.2121e+07	2.9017e+07	2.6326e+07	2.05192e+07	1.86601e+07	2.68857e+07	2.52527e+07	2.64707e+07	2.24756e+07	4.80531e+07	2.6714e+07	2.26934e+07	2.27098e+07	2.50233e+07	1.51812e+07	2.04484e+07	2.81982e+07	2.4074e+07	3.32036e+07	2.08623e+07	1.71079e+07	3.2998e+07	3.25297e+07	2.03618e+07	2.40606e+07	2.65963e+07	1.96821e+07	2.00975e+07
ENSGMOP00000011282	6	5	783.197	0.449177	1.04607	0,5	2	pep:known_by_projection genescaffold:gadMor1:GeneScaffold_1179:32699:46332:1 gene:ENSGMOG00000010542 transcript:ENSGMOT00000011586 gene_biotype:protein_coding transcript_biotype:protein_coding	1.8619e+06	1.57193e+06	1.99863e+06	1.73126e+06	1.57862e+06	1.62086e+06	1.61603e+06	1.87041e+06	1.62543e+06	1.68052e+06	1.6771e+06	1.83254e+06	1.52423e+06	1.59964e+06	1.6578e+06	1.7318e+06	1.74624e+06	1.84759e+06	1.61381e+06	1.949e+06	1.78595e+06	1.83667e+06	1.69203e+06	1.58254e+06	1.70718e+06	1.98146e+06	1.61551e+06	1.78214e+06
ENSGMOP00000008357	5	5	873.741	0.0241423	1.2764	Kontrol	2	pep:known genescaffold:gadMor1:GeneScaffold_4013:160713:162033:1 gene:ENSGMOG00000007806 transcript:ENSGMOT00000008594 gene_biotype:protein_coding transcript_biotype:protein_coding	1.7145e+06	1.4974e+06	2.43315e+06	1.63156e+06	1.78017e+06	1.41659e+06	1.62416e+06	1.88089e+06	1.74093e+06	1.43322e+06	1.71237e+06	1.7623e+06	1.01479e+06	1.2383e+06	1.30041e+06	1.30366e+06	1.22593e+06	1.28276e+06	1.2539e+06	2.3592e+06	1.62775e+06	1.81154e+06	1.45662e+06	1.22295e+06	1.59841e+06	1.85126e+06	1.31699e+06	1.18773e+06
ENSGMOP00000019372	4	4	384.589	0.425035	1.04725	2	0,5	pep:known_by_projection genescaffold:gadMor1:GeneScaffold_1499:9313:15979:-1 gene:ENSGMOG00000018014 transcript:ENSGMOT00000019842 gene_biotype:protein_coding transcript_biotype:protein_coding	498038	505593	606346	610127	560791	587474	594670	534905	586964	529201	572526	630331	503222	574275	554031	557018	597205	552039	584812	619597	518204	533443	458331	540185	556538	488618	571007	608302
ENSGMOP00000016483	1	1	100	0.590892	1.09438	Kontrol	0,5	pep:known_by_projection genescaffold:gadMor1:GeneScaffold_2058:2301:40827:-1 gene:ENSGMOG00000015375 transcript:ENSGMOT00000016899 gene_biotype:protein_coding transcript_biotype:protein_coding	65556.8	77210.3	85899.7	75014.2	93204.7	69969.7	90100.5	59966.1	53814.3	54318.6	55731.2	97019.7	56888.6	69785.8	84730.7	75353.6	61907.9	59058.9	46110.1	87081.5	61588.9	53734.1	71825.4	51674.1	59186.3	69138.9	67825.2	74218.9
ENSGMOP00000015712	45	42	6553.97	0.317604	1.17298	2	0,5	pep:known_by_projection genescaffold:gadMor1:GeneScaffold_4178:25796:197337:-1 gene:ENSGMOG00000014650 transcript:ENSGMOT00000016114 gene_biotype:protein_coding transcript_biotype:protein_coding	2.59263e+07	2.46894e+07	3.57809e+07	2.33111e+07	1.97346e+07	1.87941e+07	2.22873e+07	3.17189e+07	2.45941e+07	2.71349e+07	3.37953e+07	1.68742e+07	3.56934e+07	3.38796e+07	2.53302e+07	2.5076e+07	2.52378e+07	2.35792e+07	2.64012e+07	2.26721e+07	3.41718e+07	2.35349e+07	2.10658e+07	1.61968e+07	1.63043e+07	2.72389e+07	2.42793e+07	2.41443e+07
ENSGMOP00000016583	4	3	698.675	0.354159	1.15227	Kontrol	2	pep:known_by_projection contig::contig438040:534:1645:-1 gene:ENSGMOG00000015488 transcript:ENSGMOT00000017001 gene_biotype:protein_coding transcript_biotype:protein_coding	3.49298e+06	2.99881e+06	5.918e+06	3.73251e+06	2.87787e+06	3.55398e+06	3.76923e+06	2.93445e+06	3.05527e+06	3.623e+06	2.83233e+06	3.06683e+06	3.1693e+06	2.65014e+06	3.16481e+06	3.65923e+06	3.21157e+06	2.89244e+06	3.43742e+06	4.48513e+06	3.91159e+06	4.14838e+06	2.81943e+06	2.88768e+06	3.18059e+06	2.20805e+06	2.93203e+06	3.32897e+06
ENSGMOP00000017320	7	5	995.632	0.130809	1.16206	0,5	2	pep:known_by_projection genescaffold:gadMor1:GeneScaffold_3713:129728:139593:-1 gene:ENSGMOG00000016134 transcript:ENSGMOT00000017749 gene_biotype:protein_coding transcript_biotype:protein_coding	1.29525e+06	1.20092e+06	1.05742e+06	1.68072e+06	1.28849e+06	1.38538e+06	1.48103e+06	1.18104e+06	2.00015e+06	1.32454e+06	1.07724e+06	1.31673e+06	1.23629e+06	1.09482e+06	1.13853e+06	1.18552e+06	1.5046e+06	1.5133e+06	1.31072e+06	1.73154e+06	1.34649e+06	1.7567e+06	1.19328e+06	1.32597e+06	1.44612e+06	1.31022e+06	1.5943e+06	1.51707e+06
ENSGMOP00000012733	4	4	500	0.350014	1.18866	2	Kontrol	pep:known_by_projection genescaffold:gadMor1:GeneScaffold_32:8079:10107:1 gene:ENSGMOG00000011896 transcript:ENSGMOT00000013069 gene_biotype:protein_coding transcript_biotype:protein_coding	977711	928714	614355	987766	1.02414e+06	866038	1.1872e+06	702360	793699	446754	981463	1.69664e+06	872245	872609	1.18726e+06	1.01047e+06	1.09823e+06	674038	731018	1.00353e+06	966134	1.07389e+06	641974	997920	791583	746662	1.0475e+06	1.1229e+06
ENSGMOP00000013052	2	2	200	0.251756	1.26836	2	Kontrol	pep:known_by_projection genescaffold:gadMor1:GeneScaffold_3610:110287:114756:-1 gene:ENSGMOG00000012187 transcript:ENSGMOT00000013399 gene_biotype:protein_coding transcript_biotype:protein_coding	66972.9	33846.3	38294.3	28240.1	63104.6	22584.7	18783.3	33822.9	25801.4	23372.8	29350.7	31745	45958.4	56162.5	50837.9	56169.1	32903.8	57148.5	44762.1	18513.2	49772.2	25699.5	42251.6	67624	50911.7	38230	48128.3	26864.2
ENSGMOP00000008524	11	10	1499.59	0.5681	1.18488	Kontrol	0,5	pep:known_by_projection scaffold:gadMor1:scaffold00259:126909:129061:-1 gene:ENSGMOG00000007972 transcript:ENSGMOT00000008764 gene_biotype:protein_coding transcript_biotype:protein_coding	1.47541e+07	8.97225e+06	2.0905e+07	1.54829e+07	1.27159e+07	1.29933e+07	1.30888e+07	1.70618e+07	1.69429e+07	3.40469e+07	1.66178e+07	1.00698e+07	1.24908e+07	1.23877e+07	1.03218e+07	1.07402e+07	1.24747e+07	2.95182e+07	1.63742e+07	2.01218e+07	1.09246e+07	1.49536e+07	9.63086e+06	1.33923e+07	1.46985e+07	1.78029e+07	1.20698e+07	1.3227e+07
ENSGMOP00000007925	3	1	396.695	0.620562	1.17005	0,5	2	pep:known_by_projection genescaffold:gadMor1:GeneScaffold_4201:192613:215510:-1 gene:ENSGMOG00000007413 transcript:ENSGMOT00000008155 gene_biotype:protein_coding transcript_biotype:protein_coding	148442	90255.1	216912	207017	88534.1	83362.6	73870.2	157123	126746	81867	160026	144432	63467.6	80655.2	149444	96449.3	167453	107380	173639	129363	117706	126208	163539	100431	100196	318890	172841	108133
ENSGMOP00000011905	19	16	2592.6	0.0147622	1.3842	Kontrol	2	pep:known_by_projection genescaffold:gadMor1:GeneScaffold_1787:22967:27476:-1 gene:ENSGMOG00000011096 transcript:ENSGMOT00000012226 gene_biotype:protein_coding transcript_biotype:protein_coding	1.66486e+07	1.27075e+07	2.7445e+07	2.18196e+07	1.91879e+07	2.14254e+07	1.98277e+07	2.35254e+07	2.14269e+07	1.39595e+07	1.04094e+07	1.7212e+07	1.69943e+07	1.42873e+07	1.45294e+07	1.19588e+07	1.48121e+07	1.29844e+07	1.55338e+07	2.55707e+07	1.96167e+07	2.37602e+07	1.54493e+07	1.25585e+07	2.10933e+07	1.43526e+07	1.55739e+07	1.50778e+07
ENSGMOP00000009285	3	3	300	0.481947	1.12747	0,5	Kontrol	pep:known_by_projection genescaffold:gadMor1:GeneScaffold_3859:34582:41734:-1 gene:ENSGMOG00000008672 transcript:ENSGMOT00000009537 gene_biotype:protein_coding transcript_biotype:protein_coding	179223	185429	245837	302995	208977	183987	220244	168664	214939	200060	191006	224004	255710	233160	243485	207155	263772	252464	241868	305813	124321	233019	165538	235686	186047	269624	281172	340204
ENSGMOP00000013261	3	3	400	0.628239	1.06228	2	Kontrol	pep:known_by_projection genescaffold:gadMor1:GeneScaffold_4437:57942:59599:1 gene:ENSGMOG00000012389 transcript:ENSGMOT00000013613 gene_biotype:protein_coding transcript_biotype:protein_coding	662479	685692	685734	790686	681571	638494	930279	696861	759087	651890	782354	1.13513e+06	716679	582077	788545	688197	853048	664909	656148	823491	777028	809743	662217	793742	605720	773724	744282	869615
ENSGMOP00000009848	1	1	100	0.574885	1.07526	2	Kontrol	pep:known_by_projection genescaffold:gadMor1:GeneScaffold_752:9854:15821:1 gene:ENSGMOG00000009221 transcript:ENSGMOT00000010112 gene_biotype:protein_coding transcript_biotype:protein_coding	45538.4	45630.2	47840.1	44732.3	44084	38598.4	45838.7	57288.8	48930.2	22576.8	50065.6	51752.9	46336.8	45823.4	48161.8	56927.8	54835.1	41665.9	31257.7	46341.7	47038.5	50631.3	37655.2	40826.1	44669.4	60311.4	43642.7	53394.9
ENSGMOP00000008783	9	7	1386.43	0.665201	1.06449	0,5	Kontrol	pep:known_by_projection genescaffold:gadMor1:GeneScaffold_2603:187937:190106:-1 gene:ENSGMOG00000008210 transcript:ENSGMOT00000009028 gene_biotype:protein_coding transcript_biotype:protein_coding	4.1943e+06	3.61815e+06	4.08823e+06	3.81156e+06	4.23846e+06	3.76839e+06	5.17358e+06	4.01423e+06	3.70385e+06	3.00638e+06	4.01877e+06	6.24327e+06	3.81795e+06	3.36769e+06	4.65097e+06	3.44212e+06	4.62497e+06	3.25383e+06	3.55998e+06	4.92302e+06	4.3969e+06	4.13402e+06	3.83648e+06	4.13342e+06	3.31983e+06	4.50431e+06	4.21128e+06	4.49544e+06
ENSGMOP00000008720	1	1	100	0.655962	1.16812	Kontrol	0,5	pep:known_by_projection genescaffold:gadMor1:GeneScaffold_516:96073:113163:-1 gene:ENSGMOG00000008147 transcript:ENSGMOT00000008964 gene_biotype:protein_coding transcript_biotype:protein_coding	286793	311656	509270	231265	261284	243183	340505	332068	205230	215377	160067	342723	129775	205544	583487	400140	464383	153384	180854	231589	435286	246494	244644	254416	155667	156721	281763	256008
ENSGMOP00000001424	9	9	1559.2	0.552343	1.21072	0,5	2	pep:known_by_projection genescaffold:gadMor1:GeneScaffold_1671:978119:988180:1 gene:ENSGMOG00000001341 transcript:ENSGMOT00000001475 gene_biotype:protein_coding transcript_biotype:protein_coding	4.40071e+06	4.15339e+06	3.40857e+06	3.97547e+06	3.01933e+06	6.56888e+06	4.94473e+06	4.00329e+06	4.14505e+06	1.08363e+07	5.73242e+06	5.16695e+06	5.58708e+06	3.97549e+06	4.78514e+06	4.59502e+06	3.74883e+06	4.3487e+06	3.39389e+06	6.65829e+06	4.50719e+06	5.5057e+06	1.00624e+07	4.12187e+06	3.6474e+06	7.46298e+06	3.75281e+06	4.32463e+06
ENSGMOP00000001644	1	1	99.9947	0.0650362	1.59842	2	Kontrol	pep:known_by_projection genescaffold:gadMor1:GeneScaffold_4052:16864:21577:1 gene:ENSGMOG00000001560 transcript:ENSGMOT00000001702 gene_biotype:protein_coding transcript_biotype:protein_coding	8914.15	11627.2	3978.96	7727.98	11273.6	6069.96	8251.03	9741.02	6966.99	3223.55	9893.36	8491.99	14547.1	14622.2	17744	12776.8	10163.2	11786.3	11859.7	3437.05	8862.47	3525.18	5590.18	16080.2	10926.8	15365.8	18848.7	9870.21
ENSGMOP00000012778	22	21	3767.74	0.267575	1.16431	Kontrol	2	pep:known genescaffold:gadMor1:GeneScaffold_4591:1231:2329:-1 gene:ENSGMOG00000011938 transcript:ENSGMOT00000013116 gene_biotype:protein_coding transcript_biotype:protein_coding	2.2372e+08	1.46379e+08	3.322e+08	2.49084e+08	1.97146e+08	2.33476e+08	2.32689e+08	2.53165e+08	2.24331e+08	2.41086e+08	1.87394e+08	1.74792e+08	1.72201e+08	1.62939e+08	1.99167e+08	2.24515e+08	2.11173e+08	2.35737e+08	2.35681e+08	3.12757e+08	2.1577e+08	2.26633e+08	1.78602e+08	1.98216e+08	2.074e+08	1.82862e+08	1.62042e+08	2.61043e+08
ENSGMOP00000004049	1	1	100	0.668439	1.06591	Kontrol	0,5	pep:known_by_projection genescaffold:gadMor1:GeneScaffold_4016:11:5966:-1 gene:ENSGMOG00000003819 transcript:ENSGMOT00000004173 gene_biotype:protein_coding transcript_biotype:protein_coding	118879	110774	102704	140221	88203	134168	120044	151403	143043	141229	117652	124702	118801	139730	123279	119275	122777	92177.9	117410	96403.7	120579	121899	112246	116065	152302	82327.9	127905	126275
ENSGMOP00000019134	4	3	499.085	0.0811748	1.14968	Kontrol	2	pep:known_by_projection genescaffold:gadMor1:GeneScaffold_4617:705526:711492:1 gene:ENSGMOG00000017788 transcript:ENSGMOT00000019596 gene_biotype:protein_coding transcript_biotype:protein_coding	442656	416203	680422	470468	438734	521209	447997	537245	401065	452982	404236	422609	397445	378947	458783	480444	438734	374080	409307	460978	505167	524138	433254	458070	400902	389840	510159	408915
ENSGMOP00000004695	16	10	2282.78	0.186129	1.05736	2	Kontrol	pep:known_by_projection genescaffold:gadMor1:GeneScaffold_4582:266495:268128:1 gene:ENSGMOG00000004357 transcript:ENSGMOT00000004835 gene_biotype:protein_coding transcript_biotype:protein_coding	7.11315e+06	6.74098e+06	7.73893e+06	8.04703e+06	6.87508e+06	7.26125e+06	6.86491e+06	7.90326e+06	7.00336e+06	7.38107e+06	7.8829e+06	7.47728e+06	6.83262e+06	7.71809e+06	7.33008e+06	8.00471e+06	7.91274e+06	8.50586e+06	7.73661e+06	8.49513e+06	7.11462e+06	7.89415e+06	6.93068e+06	6.80125e+06	7.55061e+06	7.50882e+06	7.46968e+06	7.64807e+06
ENSGMOP00000008138	1	1	100	0.355899	1.41132	2	Kontrol	pep:known_by_projection genescaffold:gadMor1:GeneScaffold_2825:14892:17453:1 gene:ENSGMOG00000007610 transcript:ENSGMOT00000008371 gene_biotype:protein_coding transcript_biotype:protein_coding	51065.4	37154.9	28284.6	40195.6	56191.1	39194.7	67812.6	33431.1	17357.3	15988.8	31300.8	119429	60074.9	43685.4	88056.3	57103.7	31514.4	33853.9	26134.3	22125.4	61426.1	46827	25381.1	41619.3	36613.8	66850.5	67829.6	42539.3
ENSGMOP00000010379	9	8	1393.09	0.661844	1.11056	Kontrol	0,5	pep:known_by_projection genescaffold:gadMor1:GeneScaffold_1911:33816:39938:1 gene:ENSGMOG00000009709 transcript:ENSGMOT00000010661 gene_biotype:protein_coding transcript_biotype:protein_coding	1.83389e+06	2.68483e+06	1.95627e+06	3.12335e+06	2.65575e+06	1.69363e+06	1.14201e+06	1.81824e+06	2.34192e+06	1.8645e+06	2.71304e+06	1.68863e+06	1.81692e+06	2.03526e+06	1.46566e+06	1.95526e+06	1.41963e+06	2.15311e+06	2.9694e+06	2.40166e+06	1.73061e+06	3.20554e+06	2.3068e+06	1.33739e+06	2.02295e+06	1.18241e+06	1.13271e+06	1.79109e+06
ENSGMOP00000019047	5	5	598.318	0.673166	1.25082	0,5	Kontrol	pep:known_by_projection genescaffold:gadMor1:GeneScaffold_144:142430:156214:-1 gene:ENSGMOG00000017711 transcript:ENSGMOT00000019507 gene_biotype:protein_coding transcript_biotype:protein_coding	175398	252807	72568.3	120960	260769	181188	86771.4	203740	131862	137750	170878	147074	147460	170235	82861	453808	106648	190151	152429	132621	154256	368542	339342	188126	297184	139696	112507	95716.3
ENSGMOP00000016658	1	1	100	0.34349	1.36511	2	Kontrol	pep:known_by_projection scaffold:gadMor1:scaffold10099:32345:33861:1 gene:ENSGMOG00000015550 transcript:ENSGMOT00000017076 gene_biotype:protein_coding transcript_biotype:protein_coding	10630	5985.32	7426.81	4251.32	7639.99	4254.25	3130.04	6886.75	3565.88	1668.73	8629.18	2596.88	9800.82	8595.66	9190.26	10861.7	4292.83	6395.88	7749.35	3887.23	5967.96	3062.99	6574.67	9809.47	7752.21	10446.8	11534.8	2665.04
ENSGMOP00000012269	1	1	100	0.561161	1.18164	0,5	Kontrol	pep:known_by_projection genescaffold:gadMor1:GeneScaffold_377:518598:524399:1 gene:ENSGMOG00000011472 transcript:ENSGMOT00000012596 gene_biotype:protein_coding transcript_biotype:protein_coding	46730.4	26966	16603.5	25886.5	39664.9	19471.5	14834.8	32137.1	24148.7	9203.77	34848.5	16319.4	31056	41432.8	22891.6	35790.3	21776.6	26668.4	31134.5	20022.8	36020.9	20501.6	30906.2	34263.1	52981.2	32684.6	34480.3	10013.2
ENSGMOP00000008409	5	5	499.892	0.676384	1.05564	Kontrol	0,5	pep:known_by_projection genescaffold:gadMor1:GeneScaffold_492:65332:70231:1 gene:ENSGMOG00000007861 transcript:ENSGMOT00000008647 gene_biotype:protein_coding transcript_biotype:protein_coding	446887	427125	518271	480627	478522	333782	374369	537690	463484	377641	395520	443691	387887	487464	410144	419134	437211	450342	420761	455333	459959	410011	372695	441566	468473	306068	440713	429200
ENSGMOP00000004817	3	3	473.468	0.638085	1.04328	0,5	Kontrol	pep:known_by_projection genescaffold:gadMor1:GeneScaffold_306:1423:8726:1 gene:ENSGMOG00000004538 transcript:ENSGMOT00000004958 gene_biotype:protein_coding transcript_biotype:protein_coding	1.03751e+06	1.0578e+06	909848	1.1791e+06	1.17191e+06	1.09696e+06	1.17076e+06	1.13648e+06	1.05175e+06	767472	1.13057e+06	1.25198e+06	1.00325e+06	1.01022e+06	1.13081e+06	1.06768e+06	1.28371e+06	1.02266e+06	960386	1.03459e+06	1.1997e+06	1.1446e+06	880620	1.13977e+06	1.10024e+06	1.12042e+06	1.21663e+06	1.09714e+06
ENSGMOP00000006771	8	8	1197.68	0.668361	1.0626	0,5	Kontrol	pep:known_by_projection genescaffold:gadMor1:GeneScaffold_3297:48254:50649:-1 gene:ENSGMOG00000006378 transcript:ENSGMOT00000006966 gene_biotype:protein_coding transcript_biotype:protein_coding	5.56e+06	5.60664e+06	5.18157e+06	6.46603e+06	5.9559e+06	5.5281e+06	7.4168e+06	6.12848e+06	5.58858e+06	4.15329e+06	6.18926e+06	9.10654e+06	5.50734e+06	5.1341e+06	7.00919e+06	5.35161e+06	6.80688e+06	4.5918e+06	5.06878e+06	6.41545e+06	6.73623e+06	6.61629e+06	5.09814e+06	6.03013e+06	5.06013e+06	6.25917e+06	6.29488e+06	6.56091e+06
ENSGMOP00000010026	1	1	200	0.661959	1.06637	0,5	Kontrol	pep:known_by_projection genescaffold:gadMor1:GeneScaffold_1708:175722:177569:-1 gene:ENSGMOG00000009388 transcript:ENSGMOT00000010296 gene_biotype:protein_coding transcript_biotype:protein_coding	742836	748082	716028	985558	842448	823246	1.004e+06	768502	932389	828897	821317	887006	699140	775672	992129	892229	971558	962158	856487	1.28191e+06	763688	1.04521e+06	800792	753503	911454	769210	894183	834103
ENSGMOP00000019697	24	20	3673.28	0.373807	1.13415	Kontrol	2	pep:known_by_projection genescaffold:gadMor1:GeneScaffold_2995:298969:416718:1 gene:ENSGMOG00000018297 transcript:ENSGMOT00000020176 gene_biotype:protein_coding transcript_biotype:protein_coding	7.88289e+06	8.67661e+06	1.45465e+07	1.14563e+07	1.06528e+07	1.08733e+07	1.46841e+07	1.01365e+07	1.48419e+07	1.14436e+07	1.03118e+07	8.19682e+06	9.99238e+06	9.12839e+06	1.02699e+07	7.87091e+06	1.05937e+07	1.44458e+07	1.06024e+07	1.13589e+07	1.20849e+07	9.89085e+06	7.85998e+06	1.20952e+07	1.01232e+07	9.26149e+06	1.02044e+07	1.22531e+07
ENSGMOP00000001671	3	2	300	0.569224	1.1036	Kontrol	2	pep:known_by_projection genescaffold:gadMor1:GeneScaffold_4025:255108:256903:-1 gene:ENSGMOG00000001602 transcript:ENSGMOT00000001729 gene_biotype:protein_coding transcript_biotype:protein_coding	424152	535178	744255	526217	456527	658706	525084	738464	595629	903761	636876	418935	631456	643103	509311	560966	540438	506889	533170	464730	718542	558664	677163	569404	474789	552024	528855	480855
ENSGMOP00000011102	2	2	200	0.00170146	1.9532	2	Kontrol	pep:known_by_projection genescaffold:gadMor1:GeneScaffold_4551:400892:419341:-1 gene:ENSGMOG00000010339 transcript:ENSGMOT00000011403 gene_biotype:protein_coding transcript_biotype:protein_coding	81275.5	59425.2	50315.5	39979.8	72046.8	31780.4	32892.9	63630.5	38884.7	21591.2	97954.9	59570.4	98304.4	138888	100282	112521	78459.6	85703.5	92882.7	34651.2	58651.1	30706.1	33154.8	51354.9	54346.8	125485	108242	46786.5
ENSGMOP00000005120	1	1	100	0.28533	1.20723	Kontrol	2	pep:known_by_projection genescaffold:gadMor1:GeneScaffold_2145:33434:42678:-1 gene:ENSGMOG00000004823 transcript:ENSGMOT00000005270 gene_biotype:protein_coding transcript_biotype:protein_coding	108872	91139.8	118897	82441.3	114034	74219.4	92400.9	123955	119715	82522.1	101342	65394.9	71062.8	72452.5	81197.4	113643	67321.9	93547	85655.4	102332	125636	114007	100446	74466.6	140246	72259.7	76028.4	43859.5
ENSGMOP00000006513	3	3	299.677	0.208784	1.1624	2	Kontrol	pep:known_by_projection genescaffold:gadMor1:GeneScaffold_4557:287998:300866:1 gene:ENSGMOG00000006124 transcript:ENSGMOT00000006704 gene_biotype:protein_coding transcript_biotype:protein_coding	190159	187067	174017	202639	209448	179927	206264	193063	166626	109683	197605	304493	210234	182433	237524	199042	240148	161474	169898	192956	215731	195178	163413	175094	155637	206765	226965	212902
ENSGMOP00000006210	10	9	1575.81	0.483553	1.07796	0,5	2	pep:known_by_projection genescaffold:gadMor1:GeneScaffold_3938:58645:63877:-1 gene:ENSGMOG00000005833 transcript:ENSGMOT00000006388 gene_biotype:protein_coding transcript_biotype:protein_coding	2.24705e+06	1.74182e+06	2.40679e+06	2.49903e+06	1.59513e+06	1.66088e+06	2.04728e+06	2.2058e+06	2.35774e+06	1.9924e+06	2.27219e+06	1.78816e+06	2.10103e+06	2.07758e+06	1.88531e+06	1.97798e+06	2.03432e+06	2.26981e+06	1.76128e+06	2.58678e+06	2.28891e+06	2.5316e+06	2.0263e+06	1.75139e+06	2.19256e+06	2.09194e+06	1.97077e+06	2.14377e+06
ENSGMOP00000006301	5	5	599.785	0.686429	1.09647	Kontrol	0,5	pep:known_by_projection genescaffold:gadMor1:GeneScaffold_2701:1767:8518:-1 gene:ENSGMOG00000005925 transcript:ENSGMOT00000006482 gene_biotype:protein_coding transcript_biotype:protein_coding	521825	364644	499365	469370	346758	278614	247744	463691	367781	348707	514346	361848	281895	356152	475541	356014	389850	319852	296436	431429	290952	414731	463176	298197	496683	290876	245747	276355
ENSGMOP00000003729	2	2	199.892	0.387799	1.36366	0,5	2	pep:known_by_projection genescaffold:gadMor1:GeneScaffold_4230:19606:24839:1 gene:ENSGMOG00000003527 transcript:ENSGMOT00000003840 gene_biotype:protein_coding transcript_biotype:protein_coding	224144	159957	66148.7	150747	172084	97876.9	190724	118329	122660	40447.7	64147.2	186933	167564	178911	181401	112097	75261.5	63197.5	47893.8	49859.7	250846	237442	112738	192425	110962	174607	166512	173825
ENSGMOP00000015651	2	2	199.94	0.63235	1.22431	0,5	2	pep:known_by_projection genescaffold:gadMor1:GeneScaffold_3967:75226:77157:-1 gene:ENSGMOG00000014637 transcript:ENSGMOT00000016051 gene_biotype:protein_coding transcript_biotype:protein_coding	529049	354712	341628	485729	587613	239993	363080	504089	469826	175825	312715	426169	289252	459790	646238	558542	277265	262294	390441	325450	914454	529909	146808	442363	497284	553924	488845	536274
ENSGMOP00000004796;ENSGMOP00000004818;ENSGMOP00000004822	1	1	100	0.608212	1.03271	2	0,5	pep:known_by_projection genescaffold:gadMor1:GeneScaffold_4020:24764:42214:1 gene:ENSGMOG00000004442 transcript:ENSGMOT00000004937 gene_biotype:protein_coding transcript_biotype:protein_coding	9318.88	11497.5	13886.2	11874.8	12923.2	10513.8	12990.2	6877.6	11651.9	8889.45	16465.1	12677.2	8285.81	9416.34	10310	8291.47	11156.2	12552.1	11286.3	26831.3	5388.32	5702.68	6458.44	6300.29	11364.3	11013.1	14186.8	10013.4
ENSGMOP00000009136	2	2	200	0.682159	1.15145	0,5	2	pep:known_by_projection genescaffold:gadMor1:GeneScaffold_2886:168775:244763:-1 gene:ENSGMOG00000008510 transcript:ENSGMOT00000009385 gene_biotype:protein_coding transcript_biotype:protein_coding	68302.9	25579.7	79031.1	49863.6	57379.7	49882.1	97844.8	73320.8	13867.6	2031.54	23497.1	84275.8	25628.7	24652.4	90276.5	66783.8	62060.4	18415.6	29336.8	57126.9	74614.8	72114.8	20263.8	54746.9	29249.4	78089.5	49577	53500.9
ENSGMOP00000000955	12	11	1392.57	0.560179	1.09813	Kontrol	0,5	pep:known_by_projection genescaffold:gadMor1:GeneScaffold_2711:6906:30913:1 gene:ENSGMOG00000000920 transcript:ENSGMOT00000000991 gene_biotype:protein_coding transcript_biotype:protein_coding	1.83271e+06	2.40267e+06	2.14758e+06	2.58041e+06	1.74002e+06	2.63649e+06	2.68017e+06	1.66806e+06	2.06126e+06	3.81132e+06	2.07853e+06	2.40035e+06	2.32572e+06	2.04759e+06	2.01026e+06	2.04596e+06	2.81572e+06	2.37602e+06	3.05734e+06	2.15086e+06	1.67616e+06	2.81803e+06	2.43631e+06	1.66554e+06	1.94072e+06	2.37428e+06	1.79557e+06	2.45219e+06
ENSGMOP00000021664	1	1	100	0.680415	1.27167	0,5	Kontrol	pep:known_by_projection genescaffold:gadMor1:GeneScaffold_2470:38669:40822:1 gene:ENSGMOG00000020177 transcript:ENSGMOT00000022182 gene_biotype:protein_coding transcript_biotype:protein_coding	84612.7	29770.5	85969.4	201257	26655.2	73482.1	48790	163143	156972	25086.6	121156	107396	41387.5	58246.5	98248.2	84072.8	125314	48097.4	129592	54229.1	78834.2	84895.8	171572	123801	25098.4	241131	200275	45337.3
ENSGMOP00000008233	1	1	195.102	0.014261	2.91983	2	Kontrol	pep:known_by_projection genescaffold:gadMor1:GeneScaffold_1288:1598219:1648365:1 gene:ENSGMOG00000007694 transcript:ENSGMOT00000008467 gene_biotype:protein_coding transcript_biotype:protein_coding	30537.1	26505.2	6155.62	12660.9	33592.7	9695.25	9233.88	17477.1	12382.4	4609.17	40378	17400.9	101073	69700.8	33697.1	58111.4	25705.2	67585.3	14291.9	4760.96	30027.3	11560.4	16721.4	51600.7	16107.9	30463.9	60579.3	4917.28
ENSGMOP00000017617	12	11	1399.61	0.671517	1.09139	Kontrol	0,5	pep:known_by_projection genescaffold:gadMor1:GeneScaffold_169:300227:302937:-1 gene:ENSGMOG00000016429 transcript:ENSGMOT00000018051 gene_biotype:protein_coding transcript_biotype:protein_coding	1.62584e+06	2.12827e+06	1.56798e+06	2.28849e+06	2.18946e+06	1.92786e+06	2.64203e+06	2.24983e+06	2.07978e+06	1.3402e+06	1.51849e+06	3.11963e+06	1.65281e+06	1.67281e+06	1.83309e+06	2.06327e+06	2.51171e+06	1.78708e+06	1.73099e+06	2.01664e+06	2.15624e+06	2.11702e+06	1.59591e+06	1.80657e+06	1.64521e+06	1.47792e+06	2.0373e+06	1.67264e+06
ENSGMOP00000002222	3	2	299.575	0.0976832	1.43256	2	Kontrol	pep:known_by_projection genescaffold:gadMor1:GeneScaffold_1627:39633:56996:1 gene:ENSGMOG00000002028 transcript:ENSGMOT00000002294 gene_biotype:protein_coding transcript_biotype:protein_coding	22831.8	15784	5748.8	12218.8	16718.2	9266.95	9375.03	12086.7	11765.4	5978.98	13314.3	20309.2	22363	22385.8	17776.5	22278.5	11498.8	14263.2	12814.8	8028.01	14299.1	10204.9	14312.1	24266.9	19079.4	10824.4	21638.2	6285.99
ENSGMOP00000013527	2	2	200	0.464832	1.1493	2	0,5	pep:known_by_projection genescaffold:gadMor1:GeneScaffold_3241:229:15401:-1 gene:ENSGMOG00000012640 transcript:ENSGMOT00000013884 gene_biotype:protein_coding transcript_biotype:protein_coding	115556	98692	135979	222350	124760	157064	240645	169771	209268	144602	172769	134339	131736	147954	162475	128833	190432	226281	201725	197963	132500	111280	83287.5	149910	182110	141542	153214	150331
ENSGMOP00000017349;ENSGMOP00000017372	9	2	1171.24	0.0492508	2.29174	2	Kontrol	pep:known_by_projection genescaffold:gadMor1:GeneScaffold_3700:200808:202491:1 gene:ENSGMOG00000015766 transcript:ENSGMOT00000017779 gene_biotype:protein_coding transcript_biotype:protein_coding	36988.8	95319.3	23313.6	49295.9	98767.9	63714.4	26921	17402.4	47947.2	38585.4	134284	62057.7	137309	94046.9	28411.4	347472	42138.6	103652	78314	24838.2	27334.6	82568.9	76636.4	82079.4	123302	49024.4	45425.1	46907.6
ENSGMOP00000019057	1	1	198.559	0.00399648	1.87802	2	Kontrol	pep:known_by_projection genescaffold:gadMor1:GeneScaffold_1298:127894:134278:1 gene:ENSGMOG00000017728 transcript:ENSGMOT00000019518 gene_biotype:protein_coding transcript_biotype:protein_coding	7693.13	12088.6	4066.26	10336	9414.15	10873.5	5795.05	5883.82	7568.81	5579.65	11545.9	8528.34	21546.3	21862.3	20267.6	11760.3	11479.2	14793.6	12248.8	4798.66	6778.49	5564.89	12781.5	11002.8	10138.6	13172.6	16481.8	5292.19
ENSGMOP00000017806	4	4	776.946	0.239149	1.14176	0,5	2	pep:known_by_projection genescaffold:gadMor1:GeneScaffold_4442:560:3282:-1 gene:ENSGMOG00000016590 transcript:ENSGMOT00000018245 gene_biotype:protein_coding transcript_biotype:protein_coding	1.54988e+06	1.4348e+06	2.18032e+06	1.93575e+06	1.56644e+06	2.2546e+06	1.87395e+06	2.56132e+06	2.25542e+06	1.75537e+06	1.95625e+06	1.6864e+06	1.21787e+06	1.50823e+06	2.18394e+06	2.05602e+06	2.01152e+06	1.66472e+06	1.88092e+06	1.99915e+06	1.58332e+06	2.21565e+06	2.03649e+06	2.31659e+06	1.80979e+06	1.95259e+06	2.29118e+06	2.25282e+06
ENSGMOP00000019240	4	4	599.892	0.697379	1.07262	0,5	Kontrol	pep:known_by_projection genescaffold:gadMor1:GeneScaffold_4604:812613:813317:1 gene:ENSGMOG00000017907 transcript:ENSGMOT00000019705 gene_biotype:protein_coding transcript_biotype:protein_coding	1.37776e+06	1.33945e+06	1.46764e+06	1.27608e+06	1.44765e+06	1.34038e+06	1.81292e+06	1.16462e+06	1.51282e+06	1.3103e+06	1.6559e+06	2.22434e+06	1.26735e+06	1.18779e+06	1.48973e+06	1.23178e+06	1.61092e+06	1.15836e+06	1.35403e+06	1.98467e+06	1.48461e+06	1.72185e+06	1.44958e+06	1.47569e+06	1.09955e+06	1.35645e+06	1.42528e+06	1.56523e+06
ENSGMOP00000009870;ENSGMOP00000020060	1	1	100	0.192731	1.17514	2	Kontrol	pep:known_by_projection genescaffold:gadMor1:GeneScaffold_4209:2276:37094:1 gene:ENSGMOG00000009243 transcript:ENSGMOT00000010134 gene_biotype:protein_coding transcript_biotype:protein_coding	15048.2	21300.9	19117.7	14867.4	18003.9	14281.3	19157.9	12764.6	14476.1	15372.2	17512.1	24430.5	15232	16259.2	23478.6	19750.9	20549.8	16890.7	19760.1	22995	12402.7	12932.3	16079.8	19892	14598.7	21662.9	20744.9	19663
ENSGMOP00000000509	3	2	400	0.480324	1.11402	Kontrol	2	pep:known_by_projection genescaffold:gadMor1:GeneScaffold_1473:169052:171219:1 gene:ENSGMOG00000000526 transcript:ENSGMOT00000000537 gene_biotype:protein_coding transcript_biotype:protein_coding	259551	277442	249751	269986	297110	248667	296148	336089	234789	170516	182085	233217	256958	253795	324199	267312	258746	171241	185309	182187	301389	248581	226982	336917	223680	164377	291551	234725
ENSGMOP00000009816	8	8	1375.34	0.66425	1.07287	0,5	Kontrol	pep:known_by_projection genescaffold:gadMor1:GeneScaffold_986:108075:110117:1 gene:ENSGMOG00000009192 transcript:ENSGMOT00000010080 gene_biotype:protein_coding transcript_biotype:protein_coding	2.10006e+06	2.24244e+06	2.58792e+06	2.74791e+06	2.46543e+06	2.50952e+06	3.60532e+06	2.26945e+06	2.3228e+06	1.93716e+06	2.64822e+06	3.58698e+06	2.46835e+06	2.11346e+06	3.17293e+06	1.92313e+06	3.43584e+06	2.15021e+06	2.38137e+06	3.0356e+06	2.73769e+06	2.79129e+06	2.04814e+06	2.59527e+06	2.00196e+06	3.06803e+06	2.60707e+06	3.04991e+06
ENSGMOP00000019787	9	6	1196.62	0.627877	1.09859	0,5	2	pep:known_by_projection genescaffold:gadMor1:GeneScaffold_1515:453210:458984:-1 gene:ENSGMOG00000018387 transcript:ENSGMOT00000020269 gene_biotype:protein_coding transcript_biotype:protein_coding	848709	1.38812e+06	1.32374e+06	1.7082e+06	1.41264e+06	1.56194e+06	1.57372e+06	1.47634e+06	1.95123e+06	1.21762e+06	1.49474e+06	1.40205e+06	1.55508e+06	1.47246e+06	1.2006e+06	1.07701e+06	1.59687e+06	1.31741e+06	1.73245e+06	1.55496e+06	2.04841e+06	1.90353e+06	956493	1.35533e+06	1.30455e+06	1.67833e+06	1.75901e+06	1.55479e+06
ENSGMOP00000019121	3	3	299.88	0.0405414	1.36755	2	Kontrol	pep:known_by_projection genescaffold:gadMor1:GeneScaffold_2106:306581:348137:-1 gene:ENSGMOG00000017702 transcript:ENSGMOT00000019583 gene_biotype:protein_coding transcript_biotype:protein_coding	33577.6	38819.7	14954.6	28737.1	42682.7	32653.8	33864.2	33829	28009.5	23442.5	35886.8	36187	47775.6	50566.9	46674.9	46485.5	38850.9	42819.5	37001.2	20911.9	38943	23581.5	37345.3	51166.1	37428.7	32266.9	54409.5	21586.6
ENSGMOP00000008007	15	10	1985.58	0.697579	1.08337	Kontrol	0,5	pep:known_by_projection genescaffold:gadMor1:GeneScaffold_4201:277311:293575:1 gene:ENSGMOG00000007480 transcript:ENSGMOT00000008237 gene_biotype:protein_coding transcript_biotype:protein_coding	1.6225e+06	1.06072e+06	2.35643e+06	1.64734e+06	1.6588e+06	1.68228e+06	1.12176e+06	1.61474e+06	1.34606e+06	1.45673e+06	1.52142e+06	1.37833e+06	1.33464e+06	1.65899e+06	1.56977e+06	1.1815e+06	1.51273e+06	1.62058e+06	1.62101e+06	1.58192e+06	1.40212e+06	1.60324e+06	1.20007e+06	968029	1.58793e+06	1.45223e+06	1.31068e+06	1.82629e+06
ENSGMOP00000011524	7	7	972.524	0.0182746	1.48502	Kontrol	2	pep:known_by_projection genescaffold:gadMor1:GeneScaffold_4342:310820:313045:1 gene:ENSGMOG00000010771 transcript:ENSGMOT00000011838 gene_biotype:protein_coding transcript_biotype:protein_coding	2.97762e+06	2.36232e+06	1.88772e+06	4.81922e+06	2.47472e+06	1.82147e+06	2.60339e+06	3.51498e+06	2.76891e+06	1.98047e+06	1.66384e+06	1.90481e+06	2.76883e+06	2.14062e+06	1.6437e+06	1.55431e+06	1.62913e+06	1.45926e+06	1.72665e+06	2.71157e+06	2.84803e+06	3.59706e+06	1.23562e+06	2.08579e+06	2.11087e+06	2.53732e+06	2.50566e+06	2.24819e+06
ENSGMOP00000010105	6	6	784.542	0.699793	1.04302	Kontrol	0,5	pep:known_by_projection genescaffold:gadMor1:GeneScaffold_3989:7970:38229:-1 gene:ENSGMOG00000009458 transcript:ENSGMOT00000010378 gene_biotype:protein_coding transcript_biotype:protein_coding	849107	844885	784449	774385	865614	657646	659098	824969	741620	624427	720576	844690	730443	666023	735425	840093	783631	694843	673618	741640	726750	793731	774879	743627	809270	595280	700794	694485
ENSGMOP00000000808	7	5	998.44	0.0143069	1.26544	Kontrol	2	pep:known_by_projection genescaffold:gadMor1:GeneScaffold_534:101231:105997:-1 gene:ENSGMOG00000000800 transcript:ENSGMOT00000000842 gene_biotype:protein_coding transcript_biotype:protein_coding	2.30019e+06	2.19761e+06	3.16155e+06	2.32311e+06	2.14909e+06	2.15886e+06	2.04424e+06	2.18491e+06	2.29415e+06	2.19724e+06	2.46114e+06	1.71506e+06	1.37505e+06	1.85611e+06	1.81294e+06	1.76192e+06	1.74271e+06	1.79723e+06	1.84358e+06	3.26175e+06	2.2769e+06	2.23883e+06	2.3045e+06	1.88026e+06	2.45613e+06	2.08599e+06	1.59241e+06	1.60989e+06
ENSGMOP00000008894	1	1	100	0.691277	1.05721	0,5	Kontrol	pep:known_by_projection genescaffold:gadMor1:GeneScaffold_4587:133030:153534:-1 gene:ENSGMOG00000008312 transcript:ENSGMOT00000009140 gene_biotype:protein_coding transcript_biotype:protein_coding	67342.1	72507.6	54794	51282.2	68288.9	71168.4	60934.4	63671.2	45653.6	49107.9	57192.2	83194.2	61077.9	64042.6	58279.2	62934.1	57931.2	61008.4	56854.3	67461.3	61512.6	57745.4	88837	56502.5	56294.9	70727.7	57639.3	58693.6
ENSGMOP00000010920	13	12	1877.36	0.118307	1.19485	Kontrol	2	pep:known_by_projection genescaffold:gadMor1:GeneScaffold_329:345355:351022:1 gene:ENSGMOG00000010205 transcript:ENSGMOT00000011218 gene_biotype:protein_coding transcript_biotype:protein_coding	6.72202e+06	7.3308e+06	6.67349e+06	7.05051e+06	9.07602e+06	6.87097e+06	8.09901e+06	8.45414e+06	7.3799e+06	5.5055e+06	4.55776e+06	7.84723e+06	6.15316e+06	6.68789e+06	7.26525e+06	6.33158e+06	6.09635e+06	4.44208e+06	5.72676e+06	7.38262e+06	8.60339e+06	7.64405e+06	4.46221e+06	7.27921e+06	6.44794e+06	4.85671e+06	8.06413e+06	7.24675e+06
ENSGMOP00000003657	6	6	888.048	0.454983	1.08117	0,5	2	pep:known_by_projection genescaffold:gadMor1:GeneScaffold_4230:314:15183:1 gene:ENSGMOG00000003428 transcript:ENSGMOT00000003767 gene_biotype:protein_coding transcript_biotype:protein_coding	1.56461e+06	1.51569e+06	1.3933e+06	1.57502e+06	1.40076e+06	1.52902e+06	1.66234e+06	1.44259e+06	1.61214e+06	1.67085e+06	1.72549e+06	1.83964e+06	1.44738e+06	1.4329e+06	1.39832e+06	1.33883e+06	1.63199e+06	1.44862e+06	1.28386e+06	1.91734e+06	1.45037e+06	1.51056e+06	1.77915e+06	1.17851e+06	1.52062e+06	2.07787e+06	1.60078e+06	1.61138e+06
ENSGMOP00000015087	7	5	1083.69	0.424656	1.07677	0,5	2	pep:known_by_projection genescaffold:gadMor1:GeneScaffold_4633:275856:278644:-1 gene:ENSGMOG00000014134 transcript:ENSGMOT00000015474 gene_biotype:protein_coding transcript_biotype:protein_coding	2.62866e+06	2.23337e+06	2.67485e+06	2.95346e+06	2.8848e+06	2.69441e+06	3.51868e+06	2.85325e+06	3.04331e+06	2.22715e+06	2.60976e+06	3.65028e+06	2.25349e+06	1.89092e+06	2.60486e+06	2.46543e+06	3.01717e+06	3.03727e+06	2.77075e+06	3.27948e+06	3.1497e+06	2.82636e+06	2.65056e+06	2.6875e+06	2.90624e+06	2.78384e+06	2.88981e+06	2.99197e+06
ENSGMOP00000010875	4	4	399.304	0.281373	1.27605	Kontrol	2	pep:known_by_projection genescaffold:gadMor1:GeneScaffold_1933:42296:53040:-1 gene:ENSGMOG00000010159 transcript:ENSGMOT00000011173 gene_biotype:protein_coding transcript_biotype:protein_coding	505097	557937	290942	312387	494507	810220	370766	387057	345485	538376	304690	390370	378620	360064	230413	450190	327356	442054	369639	345430	327073	512142	675264	500632	496084	293947	284172	284266
ENSGMOP00000019804	10	9	1198.45	0.329168	1.25272	Kontrol	2	pep:known_by_projection genescaffold:gadMor1:GeneScaffold_119:390359:393307:1 gene:ENSGMOG00000018403 transcript:ENSGMOT00000020286 gene_biotype:protein_coding transcript_biotype:protein_coding	2.38089e+06	2.01953e+06	3.12726e+06	1.60152e+06	1.50651e+06	2.55506e+06	1.48351e+06	1.78176e+06	1.78677e+06	4.03178e+06	1.93188e+06	1.1591e+06	1.60532e+06	2.06641e+06	1.4736e+06	1.90381e+06	2.18826e+06	1.52575e+06	2.14878e+06	2.21455e+06	2.09994e+06	2.21202e+06	3.16405e+06	1.49859e+06	1.70986e+06	1.79237e+06	1.46103e+06	1.48091e+06
ENSGMOP00000005501	4	4	799.552	0.621297	1.06665	0,5	2	pep:known_by_projection genescaffold:gadMor1:GeneScaffold_3295:372:2562:-1 gene:ENSGMOG00000005197 transcript:ENSGMOT00000005664 gene_biotype:protein_coding transcript_biotype:protein_coding	1.88533e+06	2.38099e+06	2.27927e+06	2.54314e+06	2.48745e+06	2.65452e+06	2.79246e+06	1.65921e+06	2.51795e+06	2.25429e+06	2.57733e+06	3.09659e+06	2.284e+06	2.01569e+06	2.07778e+06	1.99933e+06	2.44084e+06	2.21321e+06	2.27006e+06	3.12672e+06	1.997e+06	2.94334e+06	2.14661e+06	2.32627e+06	2.3595e+06	2.67476e+06	2.12436e+06	2.67422e+06
ENSGMOP00000008711	1	1	100	0.0585716	1.23781	2	Kontrol	pep:known_by_projection genescaffold:gadMor1:GeneScaffold_168:1619722:1623829:-1 gene:ENSGMOG00000008140 transcript:ENSGMOT00000008954 gene_biotype:protein_coding transcript_biotype:protein_coding	149527	165143	110395	158537	214197	202953	125083	122187	171370	114879	208765	210914	201893	193377	171038	224901	162932	168516	166884	195670	114614	179028	150148	139415	184800	119374	187560	217966
ENSGMOP00000020488	2	2	300	0.0142425	1.30279	Kontrol	2	pep:known_by_projection genescaffold:gadMor1:GeneScaffold_2572:108600:113507:1 gene:ENSGMOG00000019058 transcript:ENSGMOT00000020989 gene_biotype:protein_coding transcript_biotype:protein_coding	1.79797e+06	1.57391e+06	2.72772e+06	1.93708e+06	1.61133e+06	1.70526e+06	1.51469e+06	1.71056e+06	1.72171e+06	2.01445e+06	2.08621e+06	1.47915e+06	1.46384e+06	1.58542e+06	1.17546e+06	1.07775e+06	1.32669e+06	1.18313e+06	1.27459e+06	2.27724e+06	1.46234e+06	1.51166e+06	2.1047e+06	1.21904e+06	1.76744e+06	1.95277e+06	1.50162e+06	1.59314e+06
ENSGMOP00000016643	3	2	472.188	0.0291712	1.31939	Kontrol	2	pep:known_by_projection genescaffold:gadMor1:GeneScaffold_924:394:9925:-1 gene:ENSGMOG00000015528 transcript:ENSGMOT00000017061 gene_biotype:protein_coding transcript_biotype:protein_coding	100064	70788.3	101052	98999.7	85118.5	63185.5	77458.3	119259	112527	76134.1	79089.3	76458.4	44389.6	66307.1	55644.4	67278	65304.2	97689.4	64889.7	117294	78352.7	98074.7	63450.8	74116.5	106420	64201.1	75716	73496.5
ENSGMOP00000007232	8	7	1194.71	0.277189	1.21779	2	Kontrol	pep:known_by_projection genescaffold:gadMor1:GeneScaffold_2011:133661:139689:1 gene:ENSGMOG00000006795 transcript:ENSGMOT00000007436 gene_biotype:protein_coding transcript_biotype:protein_coding	790382	982001	792741	538349	768344	896745	573945	819131	664972	402636	991919	711777	1.25362e+06	989460	932359	908329	760784	589837	785274	523098	1.16558e+06	704124	892558	777780	483943	960399	1.161e+06	652005
ENSGMOP00000001349	3	3	399.085	0.0252652	1.24701	2	Kontrol	pep:known_by_projection genescaffold:gadMor1:GeneScaffold_3298:3761:14452:1 gene:ENSGMOG00000001285 transcript:ENSGMOT00000001398 gene_biotype:protein_coding transcript_biotype:protein_coding	286562	277980	211473	220256	323609	278278	243873	273627	229427	146205	276756	359480	290395	292566	369757	327210	346292	257050	276501	250664	321082	269726	282582	271998	212673	207797	323965	236522
ENSGMOP00000018265	1	1	100	0.471052	1.21243	2	Kontrol	pep:known_by_projection genescaffold:gadMor1:GeneScaffold_3492:50659:59551:1 gene:ENSGMOG00000017007 transcript:ENSGMOT00000018713 gene_biotype:protein_coding transcript_biotype:protein_coding	41805.2	43587.6	4576.69	40172.4	49485	38192.7	40554.7	37084.4	26314.2	22398.6	28203.9	75988.6	45989.9	40552.3	56202	33787.1	36269.8	27803.4	30758.7	17411.4	43291.1	30314.4	29100.1	49909.6	39301	36364.4	61854.3	36316.3
ENSGMOP00000011693	5	2	589.397	0.0997353	1.15497	0,5	2	pep:known_by_projection genescaffold:gadMor1:GeneScaffold_2004:910101:918413:1 gene:ENSGMOG00000010936 transcript:ENSGMOT00000012008 gene_biotype:protein_coding transcript_biotype:protein_coding	910245	965094	1.28768e+06	1.03571e+06	986422	998748	843778	1.089e+06	902748	1.25503e+06	956413	900336	852378	1.11906e+06	958409	754243	983257	1.0881e+06	821718	1.26932e+06	1.22263e+06	979596	1.2127e+06	931761	1.14196e+06	1.03638e+06	829021	1.11751e+06
ENSGMOP00000009002	19	18	2393.88	0.469801	1.07211	2	Kontrol	pep:known_by_projection genescaffold:gadMor1:GeneScaffold_3804:249261:265961:-1 gene:ENSGMOG00000008408 transcript:ENSGMOT00000009248 gene_biotype:protein_coding transcript_biotype:protein_coding	3.3938e+06	3.72826e+06	5.28093e+06	3.79691e+06	4.42577e+06	4.19231e+06	3.90341e+06	5.66345e+06	4.05096e+06	2.89901e+06	4.85442e+06	4.00571e+06	5.01762e+06	4.5127e+06	4.56916e+06	4.20632e+06	4.37125e+06	3.73479e+06	4.61201e+06	3.67661e+06	5.04837e+06	3.95246e+06	4.14531e+06	4.79075e+06	3.79107e+06	4.70888e+06	5.11802e+06	3.77178e+06
ENSGMOP00000010571	2	2	199.995	0.10379	1.56696	2	Kontrol	pep:known_by_projection genescaffold:gadMor1:GeneScaffold_2580:78323:87311:-1 gene:ENSGMOG00000009882 transcript:ENSGMOT00000010858 gene_biotype:protein_coding transcript_biotype:protein_coding	70209.1	57751.1	36718.5	32717.7	84299.2	37906.1	32202.4	62996.6	44057.7	17774.5	66496.9	31376	93344.9	90931.3	109460	103278	51807.1	65391.1	60094	25763.7	60384.6	33521.5	44036.5	93080.1	54568.4	86454.4	104644	26601.6
ENSGMOP00000003241	9	7	1092.98	0.425752	1.1346	Kontrol	2	pep:known_by_projection genescaffold:gadMor1:GeneScaffold_3322:283045:292453:1 gene:ENSGMOG00000003080 transcript:ENSGMOT00000003342 gene_biotype:protein_coding transcript_biotype:protein_coding	2.26986e+06	2.47566e+06	3.729e+06	2.04544e+06	2.37629e+06	2.10221e+06	2.43164e+06	3.3198e+06	2.46955e+06	2.1015e+06	2.4343e+06	2.14437e+06	2.71476e+06	2.23802e+06	2.1983e+06	2.19108e+06	2.03721e+06	2.04651e+06	2.08082e+06	2.30406e+06	4.04965e+06	2.09438e+06	2.30231e+06	2.46978e+06	2.03887e+06	2.25443e+06	2.18286e+06	1.72167e+06
ENSGMOP00000010707	4	4	499.892	0.475387	1.09415	2	Kontrol	pep:known_by_projection genescaffold:gadMor1:GeneScaffold_485:36015:38446:1 gene:ENSGMOG00000010019 transcript:ENSGMOT00000011004 gene_biotype:protein_coding transcript_biotype:protein_coding	426034	290574	391775	386572	313418	425886	495348	441335	514835	510216	445543	430016	450869	435623	422289	398849	433217	648515	467035	642056	401495	437608	368473	422503	495629	352120	413380	497408
ENSGMOP00000011624	4	3	399.348	0.0766739	1.2544	Kontrol	2	pep:known_by_projection genescaffold:gadMor1:GeneScaffold_2165:36442:37754:1 gene:ENSGMOG00000010881 transcript:ENSGMOT00000011940 gene_biotype:protein_coding transcript_biotype:protein_coding	887702	577785	748754	537829	761443	472778	595288	689497	532726	516015	667983	722497	421493	476115	475260	325253	454420	502273	489010	766188	689712	564267	563830	509400	635513	634739	480538	394510
ENSGMOP00000012983	2	1	273.129	0.697533	1.32925	0,5	Kontrol	pep:known_by_projection genescaffold:gadMor1:GeneScaffold_3911:57300:86086:-1 gene:ENSGMOG00000012126 transcript:ENSGMOT00000013327 gene_biotype:protein_coding transcript_biotype:protein_coding	22335	21359.7	7170.27	14388.7	21039.9	11895.8	6378.87	17990.7	11631	11666.3	15192.2	6185.45	25411.8	27234.2	19260.9	21248.3	5882.51	24661.6	14695.7	8205.08	17314.4	13301.4	28646.2	27502.9	38525.7	16392.1	19487.7	5115.52
ENSGMOP00000005886	1	1	100	0.45255	1.17809	Kontrol	2	pep:novel genescaffold:gadMor1:GeneScaffold_293:581:4173:1 gene:ENSGMOG00000005536 transcript:ENSGMOT00000006059 gene_biotype:protein_coding transcript_biotype:protein_coding	74068.5	56599.4	96263.3	69097.5	66357.6	63114.7	56058.7	111774	74806.9	50376.5	60021.5	39665.9	59071.2	69301.8	67480.9	66094.4	63439.1	59112.7	64723.4	63536.4	73396.5	49535.8	61736.5	98743.2	81969.4	32189.7	77263.6	58079.5
ENSGMOP00000017676	13	13	1694.64	0.470988	1.17401	Kontrol	2	pep:known_by_projection genescaffold:gadMor1:GeneScaffold_1351:10932:21071:-1 gene:ENSGMOG00000016346 transcript:ENSGMOT00000018111 gene_biotype:protein_coding transcript_biotype:protein_coding	4.12225e+06	3.94774e+06	8.58787e+06	4.93536e+06	4.78675e+06	4.97411e+06	4.81736e+06	2.94397e+06	5.81695e+06	3.37225e+06	4.39751e+06	5.35177e+06	3.22752e+06	4.49607e+06	4.4039e+06	3.88948e+06	4.20635e+06	3.88667e+06	3.17129e+06	6.83452e+06	3.37594e+06	4.13172e+06	4.04834e+06	4.42951e+06	4.89181e+06	3.66899e+06	3.45696e+06	4.20335e+06
ENSGMOP00000016288	2	2	300	0.361732	1.12488	2	Kontrol	pep:known_by_projection genescaffold:gadMor1:GeneScaffold_1269:326821:330924:1 gene:ENSGMOG00000015216 transcript:ENSGMOT00000016703 gene_biotype:protein_coding transcript_biotype:protein_coding	525939	530553	313831	561565	493590	583710	682561	437809	577163	852381	639651	782790	663494	500364	671231	547862	675762	587961	558858	673281	493079	671765	610403	446099	448525	803209	549585	652875
ENSGMOP00000009206	7	6	799.7	0.271087	1.29742	Kontrol	2	pep:known_by_projection genescaffold:gadMor1:GeneScaffold_468:19738:42654:-1 gene:ENSGMOG00000008595 transcript:ENSGMOT00000009457 gene_biotype:protein_coding transcript_biotype:protein_coding	838099	875034	865062	699772	650748	756221	850709	1.02384e+06	566005	1.8928e+06	792639	457834	718550	778757	559078	606391	764525	865887	712190	810582	607729	1.00714e+06	932926	561035	1.1681e+06	1.04632e+06	486749	578930
ENSGMOP00000014001	3	1	297.66	0.671162	2.34436	2	Kontrol	pep:known_by_projection genescaffold:gadMor1:GeneScaffold_3515:81971:101840:-1 gene:ENSGMOG00000013073 transcript:ENSGMOT00000014364 gene_biotype:protein_coding transcript_biotype:protein_coding	20173.6	5132.56	5890.68	24707.6	20473.4	3233.58	6782.73	37447	3333.25	6459.03	14592.4	7020.24	3679.4	10951.5	131010	39071.1	69449	3724.29	2458.45	3501.45	33699.1	19185.1	36158.5	17321.3	7029.22	8874.52	24097.1	9415.28
ENSGMOP00000012800	2	2	393.722	0.00425396	1.22264	Kontrol	2	pep:known_by_projection genescaffold:gadMor1:GeneScaffold_4591:46999:53659:-1 gene:ENSGMOG00000011966 transcript:ENSGMOT00000013138 gene_biotype:protein_coding transcript_biotype:protein_coding	870395	687849	1.0217e+06	809406	803974	696407	839269	1.00287e+06	807627	694042	615865	774399	619682	592445	696809	743301	740886	640983	636450	840445	880392	699612	689686	841797	887900	793086	779583	649406
ENSGMOP00000020446	1	1	100	0.496676	1.18882	Kontrol	2	pep:known_by_projection genescaffold:gadMor1:GeneScaffold_612:1409161:1727622:1 gene:ENSGMOG00000019016 transcript:ENSGMOT00000020946 gene_biotype:protein_coding transcript_biotype:protein_coding	127155	87753.3	127477	170945	119425	121299	169416	132097	201461	146364	124180	103944	86924.3	106144	104656	111635	131541	148692	144726	165902	188633	82563	45842.3	131932	130397	162928	114165	161226
ENSGMOP00000017417	3	2	299.838	0.645794	1.13076	0,5	Kontrol	pep:known_by_projection genescaffold:gadMor1:GeneScaffold_3338:25409:38866:1 gene:ENSGMOG00000016225 transcript:ENSGMOT00000017847 gene_biotype:protein_coding transcript_biotype:protein_coding	361543	224546	480909	295677	290802	303082	282679	275388	333414	347913	411034	348956	324994	435125	326387	292138	306097	294545	380012	573721	299360	293794	275061	179827	388825	508250	362155	371484
ENSGMOP00000010060	12	11	1393.27	0.119054	1.16319	Kontrol	2	pep:known_by_projection genescaffold:gadMor1:GeneScaffold_47:294419:313839:-1 gene:ENSGMOG00000009403 transcript:ENSGMOT00000010331 gene_biotype:protein_coding transcript_biotype:protein_coding	1.62616e+06	1.47863e+06	1.87304e+06	1.27913e+06	1.44565e+06	1.41455e+06	1.5652e+06	1.66709e+06	1.25319e+06	2.06365e+06	1.09578e+06	1.22569e+06	1.40868e+06	1.45096e+06	1.32418e+06	1.53312e+06	1.39875e+06	1.40922e+06	1.27521e+06	1.2662e+06	1.32193e+06	1.19588e+06	2.12211e+06	1.56752e+06	1.52723e+06	1.61177e+06	1.37092e+06	1.39938e+06
ENSGMOP00000007830	1	1	100	0.128318	1.69186	2	Kontrol	pep:known_by_projection genescaffold:gadMor1:GeneScaffold_17:64509:79660:-1 gene:ENSGMOG00000007324 transcript:ENSGMOT00000008059 gene_biotype:protein_coding transcript_biotype:protein_coding	10900.7	15891.9	1627.64	14247.9	16124.8	20504.8	10849.4	16809.4	8872.37	7552.24	15114.1	8562.19	27981	26863.5	21901.6	32538.6	17699.5	16699.5	20509	3146.46	15266.7	6082.18	13967.3	22615.6	20490.7	27924.6	27262.2	9257.65
ENSGMOP00000008301	4	1	399.88	0.706247	1.08487	Kontrol	2	pep:known_by_projection genescaffold:gadMor1:GeneScaffold_4029:327568:333209:1 gene:ENSGMOG00000007763 transcript:ENSGMOT00000008536 gene_biotype:protein_coding transcript_biotype:protein_coding	193909	297651	170555	210133	256609	214737	130135	177935	142267	184480	170677	210321	161290	150347	166490	305414	162101	156771	157866	169635	165490	229296	299360	163824	269147	101975	109369	146385
ENSGMOP00000000321;ENSGMOP00000007736	2	2	294.178	0.715465	1.05805	0,5	Kontrol	pep:known_by_projection genescaffold:gadMor1:GeneScaffold_1141:52631:56139:-1 gene:ENSGMOG00000000326 transcript:ENSGMOT00000000340 gene_biotype:protein_coding transcript_biotype:protein_coding	497764	508444	433518	544858	533129	523260	644505	544729	578979	504975	542184	889448	449445	461833	523931	497616	530451	488219	545332	730903	571799	565810	490482	539885	491338	608567	521667	539910
ENSGMOP00000012414	11	10	1673.73	0.504711	1.05168	Kontrol	2	pep:known_by_projection genescaffold:gadMor1:GeneScaffold_3182:341421:354926:1 gene:ENSGMOG00000011607 transcript:ENSGMOT00000012743 gene_biotype:protein_coding transcript_biotype:protein_coding	1.75181e+06	1.69278e+06	1.788e+06	1.85388e+06	1.9629e+06	1.55694e+06	1.63613e+06	2.03628e+06	1.59067e+06	1.41634e+06	1.54623e+06	1.68712e+06	1.5803e+06	1.66844e+06	1.65314e+06	1.86714e+06	1.78128e+06	1.64759e+06	1.36149e+06	1.7205e+06	1.689e+06	1.61487e+06	1.85115e+06	1.62485e+06	1.69527e+06	1.7643e+06	1.5322e+06	1.49641e+06
ENSGMOP00000000983	14	12	1792.21	0.0927831	1.18661	0,5	2	pep:known_by_projection genescaffold:gadMor1:GeneScaffold_856:288966:293270:-1 gene:ENSGMOG00000000955 transcript:ENSGMOT00000001019 gene_biotype:protein_coding transcript_biotype:protein_coding	3.16489e+06	2.16931e+06	3.33533e+06	3.15565e+06	2.82558e+06	2.66743e+06	3.08039e+06	3.42535e+06	3.34868e+06	3.70723e+06	2.48917e+06	2.16811e+06	2.76381e+06	2.65347e+06	2.65774e+06	2.33438e+06	2.68194e+06	3.59935e+06	3.57658e+06	4.79323e+06	2.91268e+06	3.21251e+06	2.82761e+06	2.96484e+06	2.95559e+06	3.34159e+06	3.49433e+06	3.07332e+06
ENSGMOP00000012582	23	22	3684.36	0.642447	1.06239	Kontrol	2	pep:known_by_projection genescaffold:gadMor1:GeneScaffold_1749:207132:225968:1 gene:ENSGMOG00000011763 transcript:ENSGMOT00000012914 gene_biotype:protein_coding transcript_biotype:protein_coding	7.66483e+06	8.96899e+06	8.59601e+06	9.35857e+06	1.00794e+07	9.73937e+06	9.57434e+06	9.99589e+06	6.94077e+06	8.1524e+06	5.95298e+06	7.39919e+06	9.00018e+06	7.20044e+06	8.12036e+06	9.2215e+06	1.15081e+07	8.19021e+06	8.86317e+06	8.42538e+06	7.1216e+06	7.51744e+06	7.14131e+06	1.19642e+07	8.09415e+06	6.77144e+06	1.21893e+07	7.12953e+06
ENSGMOP00000018433	3	3	489.736	0.457082	1.066	Kontrol	2	pep:known_by_projection genescaffold:gadMor1:GeneScaffold_1712:21192:102320:-1 gene:ENSGMOG00000017135 transcript:ENSGMOT00000018886 gene_biotype:protein_coding transcript_biotype:protein_coding	1.27633e+06	1.19428e+06	1.47489e+06	1.53042e+06	1.14613e+06	1.34031e+06	1.40697e+06	1.54798e+06	1.63546e+06	1.28575e+06	1.301e+06	1.34981e+06	1.21426e+06	1.22015e+06	1.30365e+06	1.30296e+06	1.40217e+06	1.40732e+06	1.18228e+06	1.53861e+06	1.61426e+06	1.26489e+06	1.16136e+06	1.38248e+06	1.21935e+06	1.24159e+06	1.17328e+06	1.3994e+06
ENSGMOP00000014987	3	2	399.611	0.446914	1.11224	2	Kontrol	pep:known_by_projection genescaffold:gadMor1:GeneScaffold_3254:1671:5424:1 gene:ENSGMOG00000014042 transcript:ENSGMOT00000015373 gene_biotype:protein_coding transcript_biotype:protein_coding	89767.1	93502.5	96016.3	92226	106163	84004.4	65558.6	64808.9	78570.1	66165.6	124546	106424	95827	98517.2	77260.5	89410.1	73130.1	93158.7	79357.9	103958	68179	110298	83203.2	66740.2	120566	91971	78397.4	85985.9
ENSGMOP00000008405	6	4	599.892	0.337161	1.14644	Kontrol	2	pep:known_by_projection genescaffold:gadMor1:GeneScaffold_3234:15501:23244:-1 gene:ENSGMOG00000007857 transcript:ENSGMOT00000008643 gene_biotype:protein_coding transcript_biotype:protein_coding	322820	274045	443622	339361	354635	295224	322802	374321	291603	193845	237628	319836	274678	246732	328353	299772	312490	236874	265393	286791	422788	289448	248993	310981	286714	283803	327383	232916
ENSGMOP00000004657	2	2	200	0.313395	1.08439	2	Kontrol	pep:known_by_projection genescaffold:gadMor1:GeneScaffold_1282:100276:117376:-1 gene:ENSGMOG00000004372 transcript:ENSGMOT00000004797 gene_biotype:protein_coding transcript_biotype:protein_coding	212042	207594	164192	210125	208801	189618	169524	194430	173762	163172	211500	231235	192661	174640	196906	222757	231031	202260	184749	189947	171914	238391	229674	159593	200352	197243	177746	216303
ENSGMOP00000002821	3	3	400	0.0410592	1.20381	2	Kontrol	pep:known_by_projection genescaffold:gadMor1:GeneScaffold_1834:23970:24870:-1 gene:ENSGMOG00000002685 transcript:ENSGMOT00000002912 gene_biotype:protein_coding transcript_biotype:protein_coding	914469	857083	988526	779175	820188	837246	752075	889414	633570	573836	952024	1.13058e+06	957683	951930	1.12735e+06	1.11057e+06	927995	762759	795925	754920	1.0718e+06	823971	815762	807665	646980	785532	981215	960495
ENSGMOP00000002678	3	3	299.731	0.696208	1.2403	0,5	Kontrol	pep:known_by_projection genescaffold:gadMor1:GeneScaffold_3962:6086:7932:1 gene:ENSGMOG00000002485 transcript:ENSGMOT00000002763 gene_biotype:protein_coding transcript_biotype:protein_coding	251921	177167	72854.7	140648	174710	105575	140418	120048	111956	30484.7	59488.3	198245	227317	231107	228719	183940	51921.2	70531.9	51460.5	40676.4	257017	224269	103703	221601	123310	169308	210023	130030
ENSGMOP00000011121	1	1	197.046	0.739051	1.08756	0,5	Kontrol	pep:known_by_projection genescaffold:gadMor1:GeneScaffold_3121:2078:6721:-1 gene:ENSGMOG00000010376 transcript:ENSGMOT00000011422 gene_biotype:protein_coding transcript_biotype:protein_coding	1.14087e+06	713102	999782	1.08538e+06	1.00302e+06	899996	499276	1.33132e+06	1.03796e+06	688313	630043	623083	1.04212e+06	1.19412e+06	1.01812e+06	921883	983606	1.24755e+06	1.11754e+06	722639	1.06214e+06	739601	812275	1.41183e+06	1.09294e+06	1.09943e+06	1.29875e+06	960183
ENSGMOP00000003256;ENSGMOP00000014229	2	1	199.838	0.666562	1.0786	2	0,5	pep:known_by_projection genescaffold:gadMor1:GeneScaffold_565:96163:98553:-1 gene:ENSGMOG00000003101 transcript:ENSGMOT00000003357 gene_biotype:protein_coding transcript_biotype:protein_coding	110301	150697	108903	143934	126348	144682	120582	135849	95542.4	78130.8	110341	120740	126933	122956	157429	159018	94099.7	97313	105298	111022	108218	106129	100737	132254	101572	105129	147852	101483
ENSGMOP00000005004	2	2	196.517	0.463734	1.15658	Kontrol	2	pep:known_by_projection genescaffold:gadMor1:GeneScaffold_1297:281239:293086:-1 gene:ENSGMOG00000004720 transcript:ENSGMOT00000005149 gene_biotype:protein_coding transcript_biotype:protein_coding	184887	95513.3	100678	113871	123050	78833.2	143684	109292	102124	61624.7	38625.5	109737	149198	55998.2	136562	157154	91163	45980.1	82103.1	83832.4	130596	87775.1	76121.7	128830	60728.5	76665.4	125028	97590.9
ENSGMOP00000014476	1	1	100	0.330126	1.23625	Kontrol	2	pep:known_by_projection genescaffold:gadMor1:GeneScaffold_4590:610358:612659:-1 gene:ENSGMOG00000013547 transcript:ENSGMOT00000014850 gene_biotype:protein_coding transcript_biotype:protein_coding	115291	94932.7	163660	112611	129474	85640.3	101765	136323	89791.6	49946.7	115659	148294	53709.4	66020.1	93852.5	84084.7	74379.4	74553.1	75283.1	121300	162592	93620.4	82078.4	86126.5	92300.1	61035.2	84331	81787.3
ENSGMOP00000003907	1	1	100	0.3572	1.22353	Kontrol	0,5	pep:known_by_projection genescaffold:gadMor1:GeneScaffold_4185:6803:74963:-1 gene:ENSGMOG00000003672 transcript:ENSGMOT00000004026 gene_biotype:protein_coding transcript_biotype:protein_coding	23187.8	56637.2	15595.8	27557.6	11399.7	53117	26383	7322.15	5690	108499	30701.9	33686.6	34495	42377.7	21515.1	25247.4	28575.7	36930.9	28499.1	18239.6	3458.93	68511.2	54297.1	9185.53	19697.5	52501.3	2626.13	18188.3
ENSGMOP00000006480	5	4	690.361	0.728098	1.04187	Kontrol	0,5	pep:known_by_projection genescaffold:gadMor1:GeneScaffold_3483:33943:40079:-1 gene:ENSGMOG00000006100 transcript:ENSGMOT00000006671 gene_biotype:protein_coding transcript_biotype:protein_coding	463670	443859	388498	537023	458746	429806	519520	485776	483314	367373	465178	535879	419758	393352	470824	443964	485362	395183	394318	488592	494753	479343	397434	445204	403948	372138	435592	437266
ENSGMOP00000014221	2	2	200	0.437721	1.19732	2	Kontrol	pep:known_by_projection genescaffold:gadMor1:GeneScaffold_4392:27736:29604:-1 gene:ENSGMOG00000013295 transcript:ENSGMOT00000014586 gene_biotype:protein_coding transcript_biotype:protein_coding	612410	563188	413212	542521	567150	505183	485505	457198	407486	403068	433394	631661	705379	444148	1.03407e+06	812780	418926	398188	462974	455321	621010	643515	543820	474405	434013	550347	583480	521898
ENSGMOP00000017297	11	10	1399.89	0.61282	1.06188	2	Kontrol	pep:known_by_projection genescaffold:gadMor1:GeneScaffold_169:236496:237710:-1 gene:ENSGMOG00000016131 transcript:ENSGMOT00000017726 gene_biotype:protein_coding transcript_biotype:protein_coding	4.34217e+06	4.59064e+06	6.50758e+06	5.71668e+06	5.8337e+06	6.24814e+06	5.7097e+06	5.48904e+06	5.72124e+06	5.61999e+06	5.14674e+06	6.63651e+06	4.75929e+06	5.92321e+06	6.50367e+06	5.11643e+06	7.05875e+06	5.27818e+06	6.88456e+06	6.52677e+06	5.04511e+06	6.71007e+06	4.9435e+06	5.58748e+06	5.47768e+06	5.80579e+06	5.42258e+06	7.18919e+06
ENSGMOP00000009991	4	3	398.705	0.637189	1.09051	Kontrol	2	pep:known_by_projection genescaffold:gadMor1:GeneScaffold_322:312050:319801:-1 gene:ENSGMOG00000009350 transcript:ENSGMOT00000010260 gene_biotype:protein_coding transcript_biotype:protein_coding	527534	509610	569335	466510	445136	413240	419717	462771	422575	819169	496278	398928	446195	457586	355352	479616	512320	503350	522763	557552	382035	514453	670744	356245	486357	419214	403344	462098
ENSGMOP00000001780	4	4	400	0.550527	1.10426	2	0,5	pep:known_by_projection genescaffold:gadMor1:GeneScaffold_2691:1803:4975:1 gene:ENSGMOG00000001696 transcript:ENSGMOT00000001841 gene_biotype:protein_coding transcript_biotype:protein_coding	457993	383318	709023	262628	396798	402595	393022	441251	239472	307481	449224	434280	385133	371793	414249	472242	366179	318219	391480	379123	465346	463458	374521	357225	216849	248963	502478	254681
ENSGMOP00000000770	3	2	400	0.0241651	1.97854	Kontrol	2	pep:known_by_projection genescaffold:gadMor1:GeneScaffold_1373:34380:59814:1 gene:ENSGMOG00000000755 transcript:ENSGMOT00000000802 gene_biotype:protein_coding transcript_biotype:protein_coding	65921.9	91574.7	163911	69953.4	102408	33697.9	111696	168894	164735	98726.2	55180.3	49668.8	29727.9	76725.4	51625.8	34979	84476.2	47458.4	57571.7	145551	69239	100428	41327.8	115790	194152	93623.3	43409.1	43027.1
ENSGMOP00000010722	3	2	293.54	0.036894	1.19571	Kontrol	2	pep:known_by_projection genescaffold:gadMor1:GeneScaffold_971:66584:70400:-1 gene:ENSGMOG00000010032 transcript:ENSGMOT00000011019 gene_biotype:protein_coding transcript_biotype:protein_coding	169258	154892	183742	162628	184083	176844	147855	175393	138527	108042	139067	140562	125043	119335	130107	152367	140242	127190	131345	159400	203459	157370	163041	134358	161772	139077	125337	127873
ENSGMOP00000009579	7	7	899.892	0.74425	1.06022	Kontrol	0,5	pep:known_by_projection genescaffold:gadMor1:GeneScaffold_3708:274976:278817:-1 gene:ENSGMOG00000008971 transcript:ENSGMOT00000009838 gene_biotype:protein_coding transcript_biotype:protein_coding	2.09552e+06	2.19061e+06	2.96751e+06	2.82251e+06	2.54007e+06	3.32536e+06	2.00426e+06	2.13452e+06	2.9791e+06	2.18042e+06	2.54835e+06	1.60561e+06	2.51756e+06	2.7118e+06	2.72268e+06	2.27606e+06	2.33131e+06	2.28288e+06	2.75399e+06	3.46951e+06	2.52423e+06	3.09331e+06	1.97982e+06	1.53899e+06	1.95699e+06	2.36833e+06	1.97067e+06	2.52378e+06
ENSGMOP00000013539	2	2	200	0.578172	1.08941	2	0,5	pep:known_by_projection genescaffold:gadMor1:GeneScaffold_3879:11053:31221:-1 gene:ENSGMOG00000012652 transcript:ENSGMOT00000013896 gene_biotype:protein_coding transcript_biotype:protein_coding	143405	148806	176920	113601	144932	116957	87165.2	121621	82539.9	103495	140781	119663	109249	119181	152052	142850	118730	102858	117763	81654.2	90022.1	106639	141824	115519	127952	135054	93615.8	138667
ENSGMOP00000020886	12	10	2176.07	0.591112	1.13496	Kontrol	2	pep:known_by_projection genescaffold:gadMor1:GeneScaffold_2731:418:2315:1 gene:ENSGMOG00000019416 transcript:ENSGMOT00000021396 gene_biotype:protein_coding transcript_biotype:protein_coding	5.57584e+07	5.25876e+07	8.09579e+07	9.57593e+07	6.67333e+07	6.12899e+07	6.11129e+07	1.03214e+08	9.05392e+07	5.10579e+07	5.44684e+07	6.18234e+07	4.68461e+07	7.60256e+07	5.96081e+07	5.27538e+07	7.9829e+07	8.32879e+07	5.55183e+07	9.06095e+07	4.69491e+07	7.19906e+07	3.94211e+07	6.76766e+07	7.75696e+07	4.63068e+07	8.18672e+07	7.20198e+07
ENSGMOP00000003524	4	4	399.492	0.69229	1.03688	0,5	Kontrol	pep:known_by_projection genescaffold:gadMor1:GeneScaffold_4639:53074:56228:1 gene:ENSGMOG00000003328 transcript:ENSGMOT00000003629 gene_biotype:protein_coding transcript_biotype:protein_coding	516967	542555	534412	647071	571413	552480	591579	632386	589373	461916	560019	646941	496593	504999	622890	613343	637409	626200	541177	651718	602958	576539	587094	590918	466880	559576	557240	670412
ENSGMOP00000008297	3	1	300	0.565238	1.12611	0,5	2	pep:known_by_projection genescaffold:gadMor1:GeneScaffold_4029:318253:323175:1 gene:ENSGMOG00000007758 transcript:ENSGMOT00000008532 gene_biotype:protein_coding transcript_biotype:protein_coding	10951.2	11141.5	17419.3	12927.8	10241.4	12493.6	10202.3	10837.6	14280.3	10450.4	14806.9	11956.6	10882.3	9252.41	12338.5	13078.6	13829.2	6800.64	13495.2	22935.3	11786.4	14205.7	12432.6	9759.01	10900.5	14505.3	10359.4	12979.6
ENSGMOP00000016222	33	5	4467.28	0.652466	1.05109	2	0,5	pep:known_by_projection genescaffold:gadMor1:GeneScaffold_1963:307828:311694:-1 gene:ENSGMOG00000015164 transcript:ENSGMOT00000016637 gene_biotype:protein_coding transcript_biotype:protein_coding	4.61541e+06	5.08136e+06	4.65183e+06	4.74727e+06	3.96818e+06	3.21693e+06	4.01115e+06	4.1206e+06	4.74096e+06	4.48557e+06	5.30868e+06	4.1309e+06	4.82072e+06	4.48683e+06	3.93932e+06	4.66802e+06	4.16881e+06	4.39752e+06	3.56827e+06	4.49393e+06	3.71413e+06	3.81922e+06	3.32115e+06	3.29406e+06	4.03346e+06	5.01853e+06	4.89557e+06	4.97943e+06
ENSGMOP00000000694	2	2	400	0.65605	1.11004	0,5	Kontrol	pep:novel genescaffold:gadMor1:GeneScaffold_3729:227:48211:1 gene:ENSGMOG00000000690 transcript:ENSGMOT00000000725 gene_biotype:protein_coding transcript_biotype:protein_coding	110411	105482	117415	107014	127309	133294	178054	132669	174682	90300.5	137337	222400	78856.9	80461.1	104683	92901.7	152590	145556	158158	207499	168199	148839	105085	125125	90159	164759	142295	123443
ENSGMOP00000011675;ENSGMOP00000018213	1	1	100	0.00777148	3.86275	2	Kontrol	pep:known_by_projection genescaffold:gadMor1:GeneScaffold_1303:11936:23027:-1 gene:ENSGMOG00000010921 transcript:ENSGMOT00000011991 gene_biotype:protein_coding transcript_biotype:protein_coding	7593.76	5617.23	1778.9	1731.69	5655.93	1284.85	3649.79	4471.82	1239.46	1297.26	3406.4	3654.04	13851.3	30628.9	15730.2	21003.1	10294.2	13056.5	7690.23	351.778	1764.4	56.043	2156.19	3394.93	1695.54	9570.32	16263.9	3732.19
ENSGMOP00000013878	9	8	1297.73	0.749404	1.06304	0,5	Kontrol	pep:known_by_projection genescaffold:gadMor1:GeneScaffold_694:53927:58275:-1 gene:ENSGMOG00000012980 transcript:ENSGMOT00000014240 gene_biotype:protein_coding transcript_biotype:protein_coding	3.03007e+06	2.8936e+06	2.73973e+06	3.23269e+06	3.18227e+06	3.01913e+06	4.20358e+06	2.03241e+06	3.23693e+06	2.36982e+06	3.08248e+06	4.94361e+06	2.99555e+06	2.71301e+06	2.92238e+06	2.44072e+06	3.21837e+06	2.78429e+06	2.79478e+06	3.89369e+06	2.90407e+06	3.26775e+06	2.40363e+06	3.08345e+06	2.54739e+06	3.72675e+06	3.16269e+06	3.65556e+06
ENSGMOP00000004422	2	2	388.38	0.558038	1.17546	2	Kontrol	pep:known_by_projection genescaffold:gadMor1:GeneScaffold_469:103523:107533:1 gene:ENSGMOG00000004183 transcript:ENSGMOT00000004557 gene_biotype:protein_coding transcript_biotype:protein_coding	361990	582725	245721	320986	408931	516188	201697	350420	256324	345216	381291	337133	384859	726264	310117	631167	295936	340349	390998	246527	242411	439168	658152	408705	521685	310132	563299	288560
ENSGMOP00000011409	3	2	300	0.430227	1.1092	Kontrol	2	pep:known_by_projection genescaffold:gadMor1:GeneScaffold_2568:41552:42495:-1 gene:ENSGMOG00000010657 transcript:ENSGMOT00000011719 gene_biotype:protein_coding transcript_biotype:protein_coding	171340	202236	185565	177579	177034	176609	159777	153930	121463	178325	170602	208058	143197	138578	178723	132238	138666	125934	146507	229286	102904	188301	175529	163555	150928	171540	149339	129732
ENSGMOP00000011010	16	15	2069.14	0.40829	1.20626	2	Kontrol	pep:known_by_projection genescaffold:gadMor1:GeneScaffold_3746:473803:478168:1 gene:ENSGMOG00000010286 transcript:ENSGMOT00000011308 gene_biotype:protein_coding transcript_biotype:protein_coding	1.98408e+06	4.51322e+06	1.0995e+06	2.55979e+06	2.7151e+06	3.79318e+06	2.66282e+06	2.42435e+06	2.9452e+06	4.084e+06	3.17008e+06	3.04051e+06	2.98171e+06	3.06941e+06	2.42508e+06	7.05677e+06	2.64372e+06	3.63849e+06	3.22011e+06	2.49353e+06	2.15309e+06	3.7232e+06	4.54395e+06	2.96834e+06	3.66765e+06	2.70982e+06	2.56019e+06	3.04711e+06
ENSGMOP00000016283	7	5	1177.54	0.738088	1.05298	0,5	Kontrol	pep:known_by_projection genescaffold:gadMor1:GeneScaffold_766:43301:46502:1 gene:ENSGMOG00000015218 transcript:ENSGMOT00000016698 gene_biotype:protein_coding transcript_biotype:protein_coding	3.09341e+06	2.88257e+06	1.71954e+06	3.35502e+06	3.33567e+06	2.80483e+06	3.54439e+06	3.07227e+06	3.27997e+06	1.9859e+06	2.67326e+06	3.86662e+06	2.96104e+06	2.63006e+06	3.39812e+06	2.98292e+06	3.23404e+06	2.70835e+06	2.5325e+06	3.19928e+06	3.58804e+06	3.50044e+06	2.28564e+06	3.43071e+06	2.91396e+06	2.60195e+06	3.30638e+06	2.72623e+06
ENSGMOP00000021191	4	4	600	0.362538	1.09701	0,5	2	pep:known_by_projection genescaffold:gadMor1:GeneScaffold_1013:174855:175235:1 gene:ENSGMOG00000019704 transcript:ENSGMOT00000021709 gene_biotype:protein_coding transcript_biotype:protein_coding	965208	1.11385e+06	1.17974e+06	1.16963e+06	1.13767e+06	1.19142e+06	1.40283e+06	1.19963e+06	937475	1.19031e+06	1.09021e+06	1.77562e+06	1.06335e+06	973504	1.24288e+06	908459	1.12938e+06	827179	963477	1.48267e+06	1.32994e+06	1.21424e+06	1.22388e+06	1.25514e+06	944002	1.24726e+06	1.11177e+06	1.13272e+06
ENSGMOP00000007313	5	3	693.98	0.124119	1.14751	0,5	2	pep:known_by_projection genescaffold:gadMor1:GeneScaffold_949:28261:30057:1 gene:ENSGMOG00000006888 transcript:ENSGMOT00000007521 gene_biotype:protein_coding transcript_biotype:protein_coding	1.18317e+06	1.21668e+06	1.20286e+06	1.42085e+06	1.25589e+06	1.19757e+06	1.65265e+06	1.24913e+06	1.20023e+06	928815	1.11507e+06	1.57822e+06	1.09894e+06	926821	1.26173e+06	964541	1.41933e+06	940395	986616	1.51612e+06	1.42006e+06	1.48171e+06	1.14788e+06	1.3813e+06	1.26416e+06	1.19331e+06	1.19617e+06	1.20905e+06
ENSGMOP00000015062	4	2	498.93	0.716077	1.27555	0,5	Kontrol	pep:known_by_projection genescaffold:gadMor1:GeneScaffold_3926:7860:23881:-1 gene:ENSGMOG00000014102 transcript:ENSGMOT00000015449 gene_biotype:protein_coding transcript_biotype:protein_coding	158474	182400	216338	205563	173729	39195.9	125444	314058	63898.9	14858.5	76032.3	73804.2	51344.3	117561	471159	231995	520087	36973.5	53850.8	55464.4	380952	265347	360602	198965	196149	80867.3	108909	67801
ENSGMOP00000012730	10	10	1488.58	0.744153	1.05557	Kontrol	0,5	pep:known_by_projection genescaffold:gadMor1:GeneScaffold_3080:243663:266017:1 gene:ENSGMOG00000011899 transcript:ENSGMOT00000013066 gene_biotype:protein_coding transcript_biotype:protein_coding	4.24461e+06	3.80977e+06	3.65352e+06	3.70419e+06	3.96907e+06	3.3692e+06	4.44567e+06	5.18699e+06	3.40113e+06	3.96309e+06	4.35603e+06	5.19569e+06	2.56571e+06	3.51248e+06	4.60517e+06	4.4517e+06	3.76658e+06	3.26952e+06	3.83773e+06	4.74809e+06	5.07096e+06	2.90983e+06	3.72284e+06	3.41002e+06	3.35718e+06	3.69239e+06	3.70744e+06	3.27051e+06
ENSGMOP00000002975	5	3	783.516	0.482103	1.07395	Kontrol	2	pep:novel genescaffold:gadMor1:GeneScaffold_4122:25148:25764:-1 gene:ENSGMOG00000002829 transcript:ENSGMOT00000003070 gene_biotype:protein_coding transcript_biotype:protein_coding	1.08748e+06	1.17492e+06	1.058e+06	1.31048e+06	1.21821e+06	1.03082e+06	1.33278e+06	1.2132e+06	1.26066e+06	1.24082e+06	1.08871e+06	1.18686e+06	1.12516e+06	1.17755e+06	994102	980370	1.05236e+06	1.28306e+06	1.1073e+06	1.46599e+06	1.001e+06	974607	1.10234e+06	1.05709e+06	1.18686e+06	1.27965e+06	849024	1.47666e+06
ENSGMOP00000019171	2	2	271.986	0.617569	1.10065	0,5	2	pep:known_by_projection genescaffold:gadMor1:GeneScaffold_4617:841272:853629:-1 gene:ENSGMOG00000017834 transcript:ENSGMOT00000019632 gene_biotype:protein_coding transcript_biotype:protein_coding	276308	386480	363949	401850	429045	448361	369285	416304	254907	284129	327257	406285	433857	393953	390833	329323	242272	307664	361563	309890	311937	486816	325423	453875	309921	461378	512383	342772
ENSGMOP00000009296	1	1	100	0.595505	1.20568	0,5	2	pep:known_by_projection genescaffold:gadMor1:GeneScaffold_648:475525:477215:-1 gene:ENSGMOG00000008692 transcript:ENSGMOT00000009548 gene_biotype:protein_coding transcript_biotype:protein_coding	225950	197927	348573	115122	179901	190531	124812	172688	177381	193747	335410	128230	97111.9	136394	164441	108814	266597	226743	256805	281613	142020	305194	353366	103352	263530	263167	111127	251055
ENSGMOP00000002198	1	1	100	0.065509	1.39459	2	Kontrol	pep:known_by_projection genescaffold:gadMor1:GeneScaffold_2031:4960:35521:-1 gene:ENSGMOG00000002031 transcript:ENSGMOT00000002269 gene_biotype:protein_coding transcript_biotype:protein_coding	13429.9	18262	6700.17	11181	11642.8	11113.2	11101.9	12406.8	10396.4	8967.49	14476.4	11846.4	15512.7	19756.7	19179.8	20518.5	16388.2	13508	13406.3	5285.26	16793.7	7013.48	12852.6	15082.9	15735	17534.1	18085.8	11841.3
ENSGMOP00000008207	7	6	799.88	0.690283	1.07038	Kontrol	0,5	pep:known_by_projection genescaffold:gadMor1:GeneScaffold_569:7342:21697:-1 gene:ENSGMOG00000007674 transcript:ENSGMOT00000008441 gene_biotype:protein_coding transcript_biotype:protein_coding	842423	840719	1.11849e+06	664285	625453	835215	794312	1.09126e+06	544598	1.01955e+06	804645	781369	1.00525e+06	766102	961751	986081	787810	585363	793687	748364	820562	657948	1.37711e+06	775091	526867	643204	862030	631821
ENSGMOP00000017409	2	2	188.108	0.608129	1.06756	2	Kontrol	pep:known_by_projection genescaffold:gadMor1:GeneScaffold_3411:680:19263:1 gene:ENSGMOG00000016232 transcript:ENSGMOT00000017839 gene_biotype:protein_coding transcript_biotype:protein_coding	449039	489939	486856	555199	495430	615249	382950	457715	571653	519662	527485	581002	563155	607063	440964	443154	465232	569024	629685	517704	452809	509304	420314	499949	513652	481759	655310	737468
ENSGMOP00000006244	23	22	3682.9	0.121308	1.20144	Kontrol	2	pep:known_by_projection genescaffold:gadMor1:GeneScaffold_1960:970291:989434:-1 gene:ENSGMOG00000005863 transcript:ENSGMOT00000006425 gene_biotype:protein_coding transcript_biotype:protein_coding	8.60107e+06	7.67456e+06	1.14233e+07	1.14806e+07	9.24403e+06	8.82514e+06	1.12406e+07	1.26777e+07	1.27219e+07	8.55476e+06	8.83811e+06	7.14945e+06	8.14791e+06	9.42686e+06	6.81933e+06	6.17431e+06	9.42404e+06	1.08777e+07	9.88308e+06	1.18309e+07	8.86494e+06	9.59202e+06	6.4775e+06	1.00212e+07	1.25395e+07	9.77795e+06	9.17513e+06	8.28154e+06
ENSGMOP00000013517	5	4	499.305	0.21918	1.23415	Kontrol	2	pep:known_by_projection genescaffold:gadMor1:GeneScaffold_1694:178327:196837:1 gene:ENSGMOG00000012634 transcript:ENSGMOT00000013874 gene_biotype:protein_coding transcript_biotype:protein_coding	277772	263198	305631	503081	322462	282062	285743	366463	291592	224163	214007	194972	310779	306237	260462	302753	295507	222924	169185	322236	436790	319470	400341	234081	307658	181716	240982	185507
ENSGMOP00000000845	16	14	1993.16	0.702053	1.05085	0,5	Kontrol	pep:known_by_projection genescaffold:gadMor1:GeneScaffold_2690:10529:16522:-1 gene:ENSGMOG00000000838 transcript:ENSGMOT00000000879 gene_biotype:protein_coding transcript_biotype:protein_coding	7.04621e+06	6.37279e+06	7.56718e+06	6.91678e+06	7.709e+06	5.71786e+06	8.20368e+06	7.66797e+06	7.04929e+06	5.16933e+06	7.46676e+06	1.02357e+07	6.36703e+06	5.89868e+06	7.33307e+06	6.19068e+06	7.39631e+06	5.97556e+06	5.91795e+06	8.63691e+06	7.99971e+06	7.7189e+06	5.65716e+06	7.21396e+06	6.31433e+06	7.77245e+06	7.45233e+06	6.8893e+06
ENSGMOP00000006691	16	15	1698.84	0.639747	1.06496	2	0,5	pep:known_by_projection genescaffold:gadMor1:GeneScaffold_3565:261187:297616:1 gene:ENSGMOG00000006278 transcript:ENSGMOT00000006884 gene_biotype:protein_coding transcript_biotype:protein_coding	1.52566e+06	2.09774e+06	2.87872e+06	1.9016e+06	1.82969e+06	2.16099e+06	2.88957e+06	3.1691e+06	2.31462e+06	2.40069e+06	2.39902e+06	2.03246e+06	2.17999e+06	2.38712e+06	1.85823e+06	2.50576e+06	2.66964e+06	2.19976e+06	2.6679e+06	2.15516e+06	3.79986e+06	1.98036e+06	1.63109e+06	2.01827e+06	1.42952e+06	2.05917e+06	2.58168e+06	1.96998e+06
ENSGMOP00000002822	3	3	500	0.274654	1.16281	2	Kontrol	pep:known_by_projection genescaffold:gadMor1:GeneScaffold_2067:21929:43561:1 gene:ENSGMOG00000002653 transcript:ENSGMOT00000002913 gene_biotype:protein_coding transcript_biotype:protein_coding	167826	164377	166495	177847	191198	162365	212057	164133	186205	100320	193242	254070	208441	179103	229442	172101	203817	159060	172310	204906	155624	175824	108476	181822	151452	184484	223220	268136
ENSGMOP00000008356	11	8	1594.13	0.448349	1.11381	Kontrol	2	pep:known_by_projection genescaffold:gadMor1:GeneScaffold_492:30318:35251:1 gene:ENSGMOG00000007819 transcript:ENSGMOT00000008593 gene_biotype:protein_coding transcript_biotype:protein_coding	2.72157e+06	2.22067e+06	2.29155e+06	2.05391e+06	2.01547e+06	2.08131e+06	1.6968e+06	2.68225e+06	1.70897e+06	1.87111e+06	1.54802e+06	2.57769e+06	1.50222e+06	1.96911e+06	1.86151e+06	2.28593e+06	2.31836e+06	1.4347e+06	1.7489e+06	1.75829e+06	2.69886e+06	2.35314e+06	2.66771e+06	1.99106e+06	1.72906e+06	1.47929e+06	1.74632e+06	1.71709e+06
ENSGMOP00000016952	5	5	499.072	0.243931	1.17116	Kontrol	2	pep:known_by_projection genescaffold:gadMor1:GeneScaffold_2248:146619:165260:-1 gene:ENSGMOG00000015807 transcript:ENSGMOT00000017376 gene_biotype:protein_coding transcript_biotype:protein_coding	1.16079e+06	1.06499e+06	1.33427e+06	1.6222e+06	901693	1.24623e+06	772912	1.10534e+06	1.04275e+06	969589	902462	868970	974662	884889	873889	851464	1.0999e+06	980625	1.18592e+06	1.35528e+06	1.39545e+06	1.19514e+06	983245	745192	994461	879330	997681	941892
ENSGMOP00000000675	12	12	1980.06	0.143246	1.19009	Kontrol	2	pep:known_by_projection genescaffold:gadMor1:GeneScaffold_4035:153951:163949:-1 gene:ENSGMOG00000000687 transcript:ENSGMOT00000000706 gene_biotype:protein_coding transcript_biotype:protein_coding	1.16143e+07	1.18909e+07	1.61442e+07	1.0788e+07	9.88231e+06	1.14088e+07	1.39089e+07	1.00989e+07	1.04163e+07	1.76009e+07	1.17847e+07	1.02315e+07	8.4806e+06	1.04609e+07	1.00203e+07	9.20456e+06	1.32164e+07	1.0155e+07	1.00339e+07	1.17813e+07	1.18378e+07	1.41533e+07	1.3298e+07	9.18557e+06	1.11428e+07	1.45917e+07	8.78401e+06	9.88835e+06
ENSGMOP00000008581	1	1	100	0.315472	1.21528	2	Kontrol	pep:known_by_projection genescaffold:gadMor1:GeneScaffold_4413:26342:43419:-1 gene:ENSGMOG00000008009 transcript:ENSGMOT00000008822 gene_biotype:protein_coding transcript_biotype:protein_coding	9854.32	11387.7	3849.03	7199.55	9358.71	7531.55	9736.06	11384.5	6851.86	3289.76	8246.66	9609.61	10424.6	8967.49	12447.4	11447	11293.9	8083.89	7464.19	4426.73	11470.3	7134.08	6125.04	9158.5	7004.61	11203.1	16696.6	8004.94
ENSGMOP00000010958	6	6	800	0.691522	1.08956	Kontrol	2	pep:known_by_projection genescaffold:gadMor1:GeneScaffold_3276:174352:175808:1 gene:ENSGMOG00000010247 transcript:ENSGMOT00000011256 gene_biotype:protein_coding transcript_biotype:protein_coding	1.10862e+06	853834	1.02519e+06	923634	1.23905e+06	659724	969470	1.23864e+06	929931	643442	886342	1.10004e+06	795171	868109	881728	862343	939859	845443	743808	908053	1.21968e+06	831648	703041	1.05724e+06	1.06566e+06	631005	975059	691740
ENSGMOP00000000541	4	4	400	0.228602	1.30894	Kontrol	2	pep:known_by_projection genescaffold:gadMor1:GeneScaffold_896:28032:41922:-1 gene:ENSGMOG00000000555 transcript:ENSGMOT00000000569 gene_biotype:protein_coding transcript_biotype:protein_coding	485732	549669	752231	379705	483126	457552	553225	372891	378812	858793	394623	396886	295261	418176	398644	346879	560964	362342	450975	467503	351231	632874	1.09297e+06	512024	314317	424727	295322	392302
ENSGMOP00000006977	10	7	1287.09	0.332972	1.15347	Kontrol	2	pep:known_by_projection genescaffold:gadMor1:GeneScaffold_25:23526:26719:1 gene:ENSGMOG00000006569 transcript:ENSGMOT00000007178 gene_biotype:protein_coding transcript_biotype:protein_coding	4.73243e+06	6.68067e+06	5.54935e+06	7.50699e+06	7.15743e+06	4.80712e+06	5.75936e+06	6.56052e+06	6.30347e+06	7.0973e+06	5.38714e+06	4.64297e+06	4.55155e+06	6.03408e+06	4.48994e+06	4.75475e+06	7.85952e+06	5.95385e+06	4.82269e+06	8.28185e+06	8.45786e+06	6.31002e+06	4.15185e+06	4.46664e+06	6.46394e+06	4.85491e+06	4.20209e+06	6.11783e+06
ENSGMOP00000012641	2	2	300	0.205487	1.25804	2	Kontrol	pep:known_by_projection genescaffold:gadMor1:GeneScaffold_4164:6552:7761:-1 gene:ENSGMOG00000011824 transcript:ENSGMOT00000012975 gene_biotype:protein_coding transcript_biotype:protein_coding	41940.3	36704.1	16320.1	27353.8	39385.2	26878.7	26949.4	28971.1	29241.1	14223.2	33971.9	35609.1	34024.4	41184	45122.3	48617.1	30135.9	32989.9	24393	18191.7	27061.5	22820	23201.6	39985.8	30218	54285.9	41771.2	30603.5
ENSGMOP00000009862	8	6	1095.54	0.634046	1.09128	0,5	2	pep:known_by_projection genescaffold:gadMor1:GeneScaffold_752:18694:22370:1 gene:ENSGMOG00000009228 transcript:ENSGMOT00000010126 gene_biotype:protein_coding transcript_biotype:protein_coding	3.10641e+06	3.23054e+06	2.07365e+06	3.29624e+06	3.29787e+06	3.29722e+06	3.50774e+06	1.90208e+06	2.58502e+06	1.56607e+06	1.94025e+06	3.94885e+06	3.04085e+06	2.71305e+06	3.31173e+06	3.2612e+06	2.17234e+06	1.94578e+06	2.07707e+06	2.30648e+06	3.59934e+06	3.70845e+06	2.84159e+06	2.69805e+06	2.44587e+06	2.86466e+06	3.39127e+06	2.78356e+06
ENSGMOP00000020989	3	3	299.94	0.771855	1.07693	0,5	Kontrol	pep:known_by_projection genescaffold:gadMor1:GeneScaffold_3923:14085:24774:1 gene:ENSGMOG00000019511 transcript:ENSGMOT00000021501 gene_biotype:protein_coding transcript_biotype:protein_coding	205595	136667	162884	173203	172835	83936.6	141641	241339	105024	41936.5	123602	131967	121085	115549	299111	221384	224741	84014.1	86106.4	95645.8	216826	203673	114520	172751	144787	141616	146888	183287
ENSGMOP00000005804	10	9	1393.61	0.734616	1.04067	0,5	Kontrol	pep:known_by_projection genescaffold:gadMor1:GeneScaffold_660:244476:249188:1 gene:ENSGMOG00000005463 transcript:ENSGMOT00000005975 gene_biotype:protein_coding transcript_biotype:protein_coding	5.67509e+06	5.54747e+06	5.91266e+06	5.92853e+06	6.20208e+06	5.37471e+06	7.27765e+06	5.9293e+06	5.2898e+06	3.79928e+06	5.5152e+06	7.9552e+06	5.25945e+06	4.91714e+06	6.50571e+06	5.64608e+06	6.3186e+06	4.60887e+06	4.82921e+06	6.29967e+06	6.53195e+06	6.198e+06	5.10933e+06	6.29698e+06	5.41465e+06	5.66018e+06	6.06696e+06	5.74938e+06
ENSGMOP00000015149	1	1	100	0.653727	1.07257	2	0,5	pep:known_by_projection genescaffold:gadMor1:GeneScaffold_4058:37117:49777:1 gene:ENSGMOG00000014170 transcript:ENSGMOT00000015538 gene_biotype:protein_coding transcript_biotype:protein_coding	155624	207341	195330	156964	152977	183628	150480	153272	133300	124649	157386	199273	157429	158999	182734	177962	181424	109052	149339	144657	168369	182277	166676	163201	155547	103284	147439	142445
ENSGMOP00000011119	1	1	100	0.472122	1.38581	2	Kontrol	pep:known_by_projection genescaffold:gadMor1:GeneScaffold_2004:321217:322723:1 gene:ENSGMOG00000010390 transcript:ENSGMOT00000011420 gene_biotype:protein_coding transcript_biotype:protein_coding	14760.9	9690.4	3578.7	4871.71	15684.5	6793.11	9315.69	4955.99	10441	18077.4	14393.7	6116.11	7510.79	13294.8	16570.2	18363.2	5975.21	20962.5	19253.4	1820.96	8700.47	11331.3	19538.9	12478	14819.4	25409.4	17214.6	6030.66
ENSGMOP00000004328	2	2	199.785	0.443775	1.11424	2	Kontrol	pep:known_by_projection genescaffold:gadMor1:GeneScaffold_2482:56056:58336:-1 gene:ENSGMOG00000004088 transcript:ENSGMOT00000004461 gene_biotype:protein_coding transcript_biotype:protein_coding	127112	127175	82329.5	118087	148667	149244	245276	145993	177774	66974.4	128866	200672	148223	151924	154030	163933	164331	126833	153735	189586	148823	111565	117610	139260	127815	185592	189744	107992
ENSGMOP00000016748	5	4	498.371	0.0777895	1.61324	Kontrol	2	pep:known_by_projection genescaffold:gadMor1:GeneScaffold_3700:35269:43387:-1 gene:ENSGMOG00000015618 transcript:ENSGMOT00000017167 gene_biotype:protein_coding transcript_biotype:protein_coding	2.3454e+06	1.53525e+06	6.47332e+06	1.65965e+06	2.4955e+06	1.63993e+06	1.55192e+06	2.43961e+06	2.1634e+06	1.34917e+06	2.11086e+06	1.43296e+06	1.48103e+06	1.33354e+06	1.51676e+06	1.29492e+06	1.272e+06	1.34306e+06	1.41059e+06	3.51344e+06	3.21113e+06	1.53078e+06	1.30993e+06	1.66337e+06	2.13404e+06	1.51028e+06	1.75767e+06	1.38074e+06
ENSGMOP00000009997	5	4	794.046	0.107045	1.22966	0,5	2	pep:known_by_projection genescaffold:gadMor1:GeneScaffold_4259:8623:11395:-1 gene:ENSGMOG00000009355 transcript:ENSGMOT00000010266 gene_biotype:protein_coding transcript_biotype:protein_coding	2.0407e+06	2.86574e+06	1.90395e+06	1.80543e+06	2.26791e+06	1.84438e+06	2.53945e+06	2.59569e+06	1.85671e+06	3.39077e+06	1.90189e+06	1.79902e+06	2.11275e+06	2.44191e+06	2.23502e+06	2.65557e+06	1.55247e+06	1.58197e+06	1.70417e+06	2.61453e+06	2.41637e+06	2.09159e+06	3.36324e+06	2.66225e+06	1.61992e+06	2.36153e+06	2.45028e+06	2.53544e+06
ENSGMOP00000012503;ENSGMOP00000012509;ENSGMOP00000012510;ENSGMOP00000012514;ENSGMOP00000012519	3	3	399.52	0.763509	1.06572	Kontrol	2	pep:known_by_projection genescaffold:gadMor1:GeneScaffold_1739:206940:211885:1 gene:ENSGMOG00000011671 transcript:ENSGMOT00000012833 gene_biotype:protein_coding transcript_biotype:protein_coding	499312	381825	542684	348490	451762	282536	350909	491824	584910	430994	391461	474089	382433	456181	399825	179080	474789	395914	532682	778361	188736	444574	288072	297625	265650	532510	371242	586465
ENSGMOP00000007164	1	1	100	0.323829	1.1151	2	Kontrol	pep:known_by_projection genescaffold:gadMor1:GeneScaffold_25:213557:220048:1 gene:ENSGMOG00000006731 transcript:ENSGMOT00000007368 gene_biotype:protein_coding transcript_biotype:protein_coding	117594	102464	100249	108615	115533	113529	152565	105427	124318	98078.3	122259	181053	104419	126876	132496	119617	142126	108896	104719	112967	126365	126636	91947	116615	102016	132007	129699	135396
ENSGMOP00000017824	3	3	498.762	0.596949	1.36289	0,5	Kontrol	pep:known_by_projection genescaffold:gadMor1:GeneScaffold_3222:170982:172374:-1 gene:ENSGMOG00000016607 transcript:ENSGMOT00000018263 gene_biotype:protein_coding transcript_biotype:protein_coding	207758	341741	183060	203883	237083	250649	147948	146300	164793	347441	443869	201213	354956	375868	162381	182476	143203	421548	310179	187335	105074	253263	561123	158814	418960	700965	133975	216616
ENSGMOP00000003258;ENSGMOP00000003264	14	1	1695.5	0.555169	1.12723	0,5	2	pep:known_by_projection genescaffold:gadMor1:GeneScaffold_2046:631110:634393:1 gene:ENSGMOG00000003008 transcript:ENSGMOT00000003359 gene_biotype:protein_coding transcript_biotype:protein_coding	284512	307118	213621	280061	280648	236495	284432	201493	232578	147454	145028	353813	311949	338672	306724	268461	170222	144564	155487	142962	318184	378790	233493	307719	242640	286760	263537	300096
ENSGMOP00000011820	16	13	1683.81	0.776555	1.04007	Kontrol	0,5	pep:known_by_projection genescaffold:gadMor1:GeneScaffold_2185:417805:426587:1 gene:ENSGMOG00000011035 transcript:ENSGMOT00000012138 gene_biotype:protein_coding transcript_biotype:protein_coding	3.01928e+06	3.08158e+06	2.63485e+06	2.51909e+06	2.78943e+06	2.64078e+06	2.55513e+06	2.92826e+06	2.14136e+06	2.22917e+06	2.40704e+06	2.46927e+06	2.3276e+06	3.21925e+06	2.22754e+06	2.66369e+06	3.0584e+06	2.49658e+06	2.53158e+06	2.40465e+06	2.89203e+06	2.56618e+06	2.46852e+06	2.28675e+06	2.5718e+06	2.5366e+06	2.74384e+06	2.49445e+06
ENSGMOP00000006785	2	2	200	0.754692	1.09757	0,5	2	pep:known_by_projection genescaffold:gadMor1:GeneScaffold_2515:417022:446980:-1 gene:ENSGMOG00000006351 transcript:ENSGMOT00000006982 gene_biotype:protein_coding transcript_biotype:protein_coding	296347	343918	377904	513563	357078	248130	286550	305643	456515	213168	406988	427604	291893	331710	265123	244411	419465	324443	341632	491890	317981	391589	191782	311136	329478	553255	379581	384496
ENSGMOP00000012344	11	11	1772.38	0.768551	1.04492	0,5	Kontrol	pep:known_by_projection genescaffold:gadMor1:GeneScaffold_1755:567998:569572:-1 gene:ENSGMOG00000011543 transcript:ENSGMOT00000012672 gene_biotype:protein_coding transcript_biotype:protein_coding	5.18504e+06	4.66728e+06	4.36497e+06	4.7528e+06	5.45896e+06	4.42735e+06	6.40954e+06	5.47686e+06	4.60672e+06	3.0705e+06	4.54455e+06	6.78033e+06	4.81176e+06	4.5356e+06	5.82346e+06	4.75091e+06	5.67686e+06	4.24118e+06	3.99995e+06	4.77144e+06	5.404e+06	4.96489e+06	3.94176e+06	5.53466e+06	4.49144e+06	5.73494e+06	5.64488e+06	5.04762e+06
ENSGMOP00000000904	7	7	899.172	0.783697	1.05688	Kontrol	0,5	pep:known_by_projection genescaffold:gadMor1:GeneScaffold_4035:639496:642970:1 gene:ENSGMOG00000000876 transcript:ENSGMOT00000000939 gene_biotype:protein_coding transcript_biotype:protein_coding	1.2603e+06	1.30934e+06	1.03499e+06	994115	1.27721e+06	1.28577e+06	1.24119e+06	1.35108e+06	885465	1.01915e+06	811746	1.5822e+06	1.05333e+06	1.04159e+06	1.26036e+06	1.25165e+06	1.51382e+06	852931	990911	819594	1.13149e+06	1.19498e+06	1.52747e+06	1.09388e+06	917852	979674	1.27022e+06	992879
ENSGMOP00000015121	1	1	100	0.49656	1.99824	0,5	Kontrol	pep:known genescaffold:gadMor1:GeneScaffold_3791:253070:254184:-1 gene:ENSGMOG00000014168 transcript:ENSGMOT00000015509 gene_biotype:protein_coding transcript_biotype:protein_coding	223.196	406.436	204.898	362.225	100.082	612.785	34.8221	113.637	291.103	143.154	1487.68	387.115	752.323	502.41	188.441	326.919	38.5158	246.661	464.319	1061.99	252.392	383.133	56.9441	100.179	876.697	1532.15	55.9381	162.842
ENSGMOP00000016732	7	6	899.785	0.746105	1.06298	0,5	2	pep:novel genescaffold:gadMor1:GeneScaffold_4661:55243:59873:-1 gene:ENSGMOG00000015606 transcript:ENSGMOT00000017151 gene_biotype:protein_coding transcript_biotype:protein_coding	1.03148e+06	1.09384e+06	1.23563e+06	884143	1.00364e+06	1.09712e+06	721365	803137	879261	737798	1.12764e+06	1.00627e+06	861349	825357	1.01565e+06	1.06075e+06	883948	806491	907916	1.07281e+06	886763	1.19226e+06	1.23757e+06	984260	1.13125e+06	893418	647127	984919
ENSGMOP00000012167	1	1	97.9548	0.104969	1.62776	0,5	2	pep:known_by_projection genescaffold:gadMor1:GeneScaffold_3726:51839:57060:-1 gene:ENSGMOG00000011380 transcript:ENSGMOT00000012493 gene_biotype:protein_coding transcript_biotype:protein_coding	2.201e+07	1.46643e+07	2.19728e+07	1.35723e+07	1.02368e+07	2.21764e+07	1.65883e+07	2.22001e+07	1.55159e+07	4.97254e+07	1.91249e+07	6.12387e+06	2.14142e+07	1.79389e+07	1.0772e+07	1.49538e+07	1.08225e+07	1.83477e+07	1.4925e+07	2.94239e+07	1.81358e+07	1.92535e+07	5.14635e+07	1.56329e+07	1.55122e+07	3.94583e+07	1.39131e+07	1.60154e+07
ENSGMOP00000011575	31	1	4178.66	0.445272	1.14619	Kontrol	2	pep:known_by_projection genescaffold:gadMor1:GeneScaffold_3850:387318:390845:-1 gene:ENSGMOG00000010830 transcript:ENSGMOT00000011890 gene_biotype:protein_coding transcript_biotype:protein_coding	2.11677e+06	1.33627e+06	2.66567e+06	2.19393e+06	1.37267e+06	2.12206e+06	1.41987e+06	1.84293e+06	2.36188e+06	2.22759e+06	1.81515e+06	1.20184e+06	1.69284e+06	1.8461e+06	1.87442e+06	1.46282e+06	1.69671e+06	1.99619e+06	1.85087e+06	2.07643e+06	2.08216e+06	1.71964e+06	1.81283e+06	1.22704e+06	1.64672e+06	2.41269e+06	1.75378e+06	1.6745e+06
ENSGMOP00000000508	4	4	399.838	0.586993	1.11704	0,5	Kontrol	pep:novel genescaffold:gadMor1:GeneScaffold_4562:133539:152944:-1 gene:ENSGMOG00000000527 transcript:ENSGMOT00000000536 gene_biotype:protein_coding transcript_biotype:protein_coding	252435	327628	331758	386708	414471	187973	369514	506078	503179	307475	308911	358610	526456	481945	360873	434509	399737	386936	334420	431620	809672	358551	267080	399244	245936	315686	364742	413833
ENSGMOP00000021254;ENSGMOP00000021991	8	2	1399.02	0.526845	1.15864	Kontrol	2	pep:novel genescaffold:gadMor1:GeneScaffold_1500:2376:4295:-1 gene:ENSGMOG00000019767 transcript:ENSGMOT00000021772 gene_biotype:protein_coding transcript_biotype:protein_coding	1.26289e+06	823463	1.6605e+06	1.0407e+06	1.04169e+06	674796	899632	1.34352e+06	918890	672960	1.07482e+06	938233	671636	826003	889405	997665	961821	851831	819718	1.17254e+06	1.3119e+06	1.02027e+06	750738	831314	1.00995e+06	768181	866047	762014
ENSGMOP00000013263	2	2	300	0.248359	1.544	0,5	2	pep:known_by_projection genescaffold:gadMor1:GeneScaffold_1057:7808:12410:-1 gene:ENSGMOG00000012391 transcript:ENSGMOT00000013615 gene_biotype:protein_coding transcript_biotype:protein_coding	2.74065e+06	1.86593e+06	846409	1.31943e+06	1.48789e+06	2.39799e+06	425434	2.86549e+06	1.28382e+06	919562	1.21943e+06	793410	1.18565e+06	1.74398e+06	401312	3.15449e+06	1.33529e+06	585145	862238	1.66671e+06	1.10982e+06	5.33459e+06	2.26942e+06	1.49047e+06	1.32578e+06	981317	1.24069e+06	1.99896e+06
ENSGMOP00000008338;ENSGMOP00000008361;ENSGMOP00000008365;ENSGMOP00000008402;ENSGMOP00000008410;ENSGMOP00000008435	20	8	2995.02	0.739711	1.15246	2	0,5	pep:known_by_projection genescaffold:gadMor1:GeneScaffold_2809:13849:18709:1 gene:ENSGMOG00000007779 transcript:ENSGMOT00000008573 gene_biotype:protein_coding transcript_biotype:protein_coding	1.0398e+07	9.86822e+06	1.2727e+07	8.42695e+06	4.93472e+06	1.55881e+07	9.85736e+06	1.12308e+07	9.94074e+06	1.44136e+07	1.61591e+07	1.93051e+07	8.98033e+06	9.19237e+06	1.66356e+07	1.17855e+07	6.83234e+06	6.3161e+06	5.98693e+06	1.16829e+07	1.44584e+07	9.84625e+06	1.6153e+07	6.49733e+06	9.04789e+06	8.73436e+06	6.7487e+06	4.63736e+06
ENSGMOP00000001666;ENSGMOP00000008177	1	1	100	0.0941169	1.34639	Kontrol	2	pep:known_by_projection genescaffold:gadMor1:GeneScaffold_4549:73888:74656:-1 gene:ENSGMOG00000001599 transcript:ENSGMOT00000001724 gene_biotype:protein_coding transcript_biotype:protein_coding	482723	343421	733063	489565	407651	347406	273840	470392	516013	330695	449267	335193	274979	323326	248208	292000	284975	368785	360963	674698	562477	415346	272403	356556	422076	391541	257471	315859
ENSGMOP00000016207;ENSGMOP00000019506	1	1	199.399	0.0240701	1.69046	0,5	2	pep:known_by_projection genescaffold:gadMor1:GeneScaffold_1963:301149:303700:1 gene:ENSGMOG00000015134 transcript:ENSGMOT00000016622 gene_biotype:protein_coding transcript_biotype:protein_coding	102541	36832.4	55810.5	53935.1	40323.3	40343.7	46915.1	42497.3	41438.6	17226.4	30470.2	52537.9	24931	26083.3	45302.3	50070.3	12446.7	21532.9	19065.2	43336.1	54147.1	59317.5	29724.4	95575.3	47458.5	62124.9	32294.6	53473.2
ENSGMOP00000017039	2	2	199.7	0.0733503	1.35836	2	Kontrol	pep:known_by_projection genescaffold:gadMor1:GeneScaffold_3571:45608:49712:-1 gene:ENSGMOG00000015885 transcript:ENSGMOT00000017465 gene_biotype:protein_coding transcript_biotype:protein_coding	46892.9	43888.5	16325.4	34035.4	44498.1	38734.2	31899.8	40017.3	26495.8	31141.4	47571.2	33394.3	60636.9	59912.9	48830.3	52111.4	37382.5	43519.7	49326	21695.7	44247.8	27486.2	29906.9	64175.1	37740	40184	63008.7	29605.4
ENSGMOP00000008491	4	3	397.718	0.379903	1.12183	2	Kontrol	pep:known_by_projection genescaffold:gadMor1:GeneScaffold_2569:130704:136100:-1 gene:ENSGMOG00000007941 transcript:ENSGMOT00000008730 gene_biotype:protein_coding transcript_biotype:protein_coding	211102	293992	207524	301243	265685	290491	360083	321312	264994	218471	269976	422015	268137	242639	341112	301508	383318	239732	292850	256776	325699	285789	233654	335284	258327	268831	291955	318355
ENSGMOP00000004341	2	2	398.859	0.148936	1.20703	0,5	2	pep:known_by_projection genescaffold:gadMor1:GeneScaffold_2482:59441:60166:-1 gene:ENSGMOG00000004109 transcript:ENSGMOT00000004474 gene_biotype:protein_coding transcript_biotype:protein_coding	396387	452118	425419	514927	455058	508838	613587	292402	483229	344139	425854	690936	481360	357958	289903	254307	370779	293890	404866	561941	377897	566442	401120	472542	482811	600122	427525	418539
ENSGMOP00000010075	3	3	299.82	0.796824	1.04091	Kontrol	0,5	pep:known_by_projection genescaffold:gadMor1:GeneScaffold_2552:35378:50659:-1 gene:ENSGMOG00000009431 transcript:ENSGMOT00000010346 gene_biotype:protein_coding transcript_biotype:protein_coding	228652	273197	252801	220111	200502	234857	206562	222254	166608	227600	241532	233985	197228	208838	239973	262506	197418	186842	206963	223028	213011	220710	244702	208285	228545	188422	158997	245134
ENSGMOP00000003588	7	7	1286.59	0.682703	1.11689	2	Kontrol	pep:known_by_projection genescaffold:gadMor1:GeneScaffold_1:429918:434231:-1 gene:ENSGMOG00000003389 transcript:ENSGMOT00000003695 gene_biotype:protein_coding transcript_biotype:protein_coding	2.28278e+06	2.42884e+06	2.08594e+06	2.54145e+06	2.71919e+06	2.70049e+06	3.6978e+06	2.42189e+06	2.48808e+06	1.96937e+06	2.28697e+06	5.36184e+06	2.25493e+06	2.02776e+06	3.04882e+06	2.32566e+06	3.30898e+06	2.39481e+06	2.45789e+06	2.99993e+06	2.80621e+06	2.71632e+06	2.95812e+06	2.77411e+06	1.96518e+06	2.72215e+06	2.77859e+06	2.44512e+06
ENSGMOP00000021065	5	4	499.839	0.16672	1.12268	Kontrol	2	pep:known_by_projection genescaffold:gadMor1:GeneScaffold_1477:143231:148106:1 gene:ENSGMOG00000019587 transcript:ENSGMOT00000021579 gene_biotype:protein_coding transcript_biotype:protein_coding	555554	489362	622485	607517	522256	451183	489152	693683	579797	447044	538234	481684	446710	459663	468605	453710	558020	502879	465936	626498	570906	591223	456550	463726	576230	491753	440756	503053
ENSGMOP00000002581	1	1	198.762	0.242934	1.1646	0,5	2	pep:known_by_projection genescaffold:gadMor1:GeneScaffold_3943:180053:201153:-1 gene:ENSGMOG00000002414 transcript:ENSGMOT00000002664 gene_biotype:protein_coding transcript_biotype:protein_coding	171050	159708	125898	217991	188576	130820	147794	155152	218266	151912	118998	205534	153192	151901	157386	139537	161527	126895	147469	223270	214164	197173	118432	158088	165964	190173	152321	167112
ENSGMOP00000014458	2	2	199.94	0.735418	1.07876	Kontrol	0,5	pep:known_by_projection genescaffold:gadMor1:GeneScaffold_3949:88134:89792:1 gene:ENSGMOG00000013530 transcript:ENSGMOT00000014832 gene_biotype:protein_coding transcript_biotype:protein_coding	213248	249707	169589	275748	265975	277712	335676	275418	175988	372457	213766	241519	224216	330738	215666	258038	248887	334977	259340	258174	232116	305445	233202	238083	256438	141532	278354	235414
ENSGMOP00000005479	1	1	200	0.765527	1.09704	Kontrol	0,5	pep:known_by_projection genescaffold:gadMor1:GeneScaffold_2955:34114:41245:-1 gene:ENSGMOG00000005176 transcript:ENSGMOT00000005642 gene_biotype:protein_coding transcript_biotype:protein_coding	140745	291931	287595	271675	295772	319299	520348	291901	279285	252428	227038	489043	188339	198685	332832	216305	299513	231644	257347	198178	227750	208375	243489	311738	149882	408506	385893	287137
ENSGMOP00000020041	5	5	697.627	0.764935	1.38956	0,5	2	pep:known_by_projection genescaffold:gadMor1:GeneScaffold_3291:22751:24047:-1 gene:ENSGMOG00000018654 transcript:ENSGMOT00000020535 gene_biotype:protein_coding transcript_biotype:protein_coding	270595	247911	1.57396e+06	212306	284788	1.59813e+06	294039	389667	225043	315768	195873	463322	203641	581812	660094	306145	297467	408277	875961	1.78965e+06	518329	262477	300982	1.06251e+06	230769	450572	241509	691147
ENSGMOP00000004564	1	1	200	0.592748	1.10178	2	Kontrol	pep:known_by_projection genescaffold:gadMor1:GeneScaffold_1592:1945:26232:1 gene:ENSGMOG00000004295 transcript:ENSGMOT00000004701 gene_biotype:protein_coding transcript_biotype:protein_coding	158684	125629	64965.1	107520	145459	117230	124664	149999	120995	68377.3	101586	111371	141800	128398	138327	129435	118545	157327	146795	82502	132573	114585	133501	173109	125942	162624	171365	66835.7
ENSGMOP00000005462	1	1	200	0.7887	1.4748	0,5	Kontrol	pep:known_by_projection genescaffold:gadMor1:GeneScaffold_843:45818:48122:-1 gene:ENSGMOG00000005166 transcript:ENSGMOT00000005625 gene_biotype:protein_coding transcript_biotype:protein_coding	106454	195271	57518.2	71207.9	139335	249839	99530.5	28843.7	161103	197620	380255	162380	263684	167586	25515.8	31645.6	31018	244488	237411	183927	30946.6	195111	308383	87529.2	320927	407666	45143.3	154802
ENSGMOP00000004476	2	2	200	0.512368	1.22606	2	Kontrol	pep:known_by_projection genescaffold:gadMor1:GeneScaffold_3642:139414:166434:-1 gene:ENSGMOG00000004194 transcript:ENSGMOT00000004612 gene_biotype:protein_coding transcript_biotype:protein_coding	31190	33691.5	17290.4	32496	40145.8	11452.4	17821.2	62232.1	22624.2	8073.11	32546.5	16038.2	38129.4	35443	53742.8	45103.2	31884	33442.7	19344.6	8651.41	39625.3	32539.3	31551.3	42907.9	29809.4	46047.3	51979.1	9998.38
ENSGMOP00000010532	1	1	100	0.000424226	1.58072	Kontrol	2	pep:known_by_projection genescaffold:gadMor1:GeneScaffold_1032:2453:8620:1 gene:ENSGMOG00000009848 transcript:ENSGMOT00000010819 gene_biotype:protein_coding transcript_biotype:protein_coding	804855	560329	977361	673782	637273	619607	610694	771383	722936	1.17217e+06	534570	405163	499871	440985	468866	394448	543633	534260	477093	703510	602707	1.11357e+06	680496	659794	922425	771184	517090	449596
ENSGMOP00000004365	6	4	696.336	0.762596	1.05653	2	Kontrol	pep:novel genescaffold:gadMor1:GeneScaffold_2420:28887:32793:-1 gene:ENSGMOG00000004133 transcript:ENSGMOT00000004498 gene_biotype:protein_coding transcript_biotype:protein_coding	1.16109e+06	1.08014e+06	820167	1.19382e+06	1.29113e+06	1.15908e+06	1.06631e+06	1.04504e+06	1.25576e+06	984440	1.47631e+06	1.59219e+06	1.12482e+06	1.10646e+06	1.09409e+06	890375	917499	1.19117e+06	1.12097e+06	1.33915e+06	878118	965341	1.11801e+06	1.09646e+06	1.29836e+06	1.46711e+06	1.26983e+06	1.06776e+06
ENSGMOP00000020873	1	1	100	0.540947	1.10194	2	Kontrol	pep:known_by_projection genescaffold:gadMor1:GeneScaffold_2236:143283:169695:-1 gene:ENSGMOG00000019404 transcript:ENSGMOT00000021383 gene_biotype:protein_coding transcript_biotype:protein_coding	52886.5	48217.5	68461.3	51618.5	51919.4	49998.2	57794	53371.1	42826.4	33815.7	48403.3	64370.5	48258.6	44424.6	67267.3	71151.7	65336.8	43285.6	54194.4	59973	55246.9	56006.7	42094.9	48267.6	39304.8	59444.3	55551.9	70222.2
ENSGMOP00000011895	1	1	100	0.389906	1.15887	Kontrol	2	pep:known_by_projection genescaffold:gadMor1:GeneScaffold_3730:18540:20683:-1 gene:ENSGMOG00000011124 transcript:ENSGMOT00000012214 gene_biotype:protein_coding transcript_biotype:protein_coding	149933	193798	220829	160804	165567	148193	221195	216722	168904	102423	154730	155832	129777	136550	203263	173928	147629	90725	165383	148673	240932	192216	142848	182453	119817	139401	155940	144180
ENSGMOP00000009358;ENSGMOP00000009376	4	4	600	0.328772	1.33821	2	Kontrol	pep:known_by_projection genescaffold:gadMor1:GeneScaffold_4232:317501:321607:-1 gene:ENSGMOG00000008715 transcript:ENSGMOT00000009611 gene_biotype:protein_coding transcript_biotype:protein_coding	588384	863321	501865	688948	900046	1.32777e+06	515937	849723	903242	774787	1.18496e+06	839635	856364	814690	595067	2.28554e+06	614603	1.30985e+06	1.03083e+06	750818	619248	1.14929e+06	1.37457e+06	839453	1.25906e+06	832094	490468	685996
ENSGMOP00000005403	1	1	99.7846	0.118595	1.39191	Kontrol	2	pep:known_by_projection genescaffold:gadMor1:GeneScaffold_1806:70189:83960:-1 gene:ENSGMOG00000005083 transcript:ENSGMOT00000005565 gene_biotype:protein_coding transcript_biotype:protein_coding	137425	108602	199588	116870	105978	105525	154240	119990	115479	73277.2	41386.2	122224	72731.1	81227.6	140973	62353.9	125067	65827.4	88030.2	148070	157712	151195	99991.7	140403	82578.1	37105.1	104117	118581
ENSGMOP00000011205	5	3	874.162	0.766716	1.08189	0,5	Kontrol	pep:known_by_projection genescaffold:gadMor1:GeneScaffold_1404:8536:11748:-1 gene:ENSGMOG00000010471 transcript:ENSGMOT00000011506 gene_biotype:protein_coding transcript_biotype:protein_coding	382461	434803	419245	439910	491654	457474	536393	321359	438771	327427	494516	643723	452912	356728	539949	387473	503740	301720	432941	529158	464228	569948	245810	485987	361644	473838	512963	494160
ENSGMOP00000014211	25	24	4785.38	0.606206	1.06941	Kontrol	2	pep:known_by_projection genescaffold:gadMor1:GeneScaffold_4392:11977:21798:-1 gene:ENSGMOG00000013283 transcript:ENSGMOT00000014576 gene_biotype:protein_coding transcript_biotype:protein_coding	2.86462e+07	2.75211e+07	2.95575e+07	3.78648e+07	2.65723e+07	3.16525e+07	3.76286e+07	3.31312e+07	3.6762e+07	4.22544e+07	2.8606e+07	2.66294e+07	3.62924e+07	2.94551e+07	2.47282e+07	3.0048e+07	3.09887e+07	3.61016e+07	3.62125e+07	4.29398e+07	3.16969e+07	3.17556e+07	2.94943e+07	2.76538e+07	3.10674e+07	3.05542e+07	2.93782e+07	3.05878e+07
ENSGMOP00000005339	1	1	100	0.237168	1.22223	2	Kontrol	pep:known_by_projection genescaffold:gadMor1:GeneScaffold_1876:1139779:1141041:-1 gene:ENSGMOG00000005056 transcript:ENSGMOT00000005499 gene_biotype:protein_coding transcript_biotype:protein_coding	62173	70964.3	34001.5	79253.8	53126.7	71475.4	65885	46158.3	54230.3	77115.2	66278.2	70148.4	59467.3	65912	84408.5	86217.8	112451	84747.8	46193.8	52342.5	44597.1	79472.7	69385.3	56320.8	76605.8	70423.5	53560.9	89319.7
ENSGMOP00000005538	25	21	2870.52	0.804968	1.07107	Kontrol	0,5	pep:known_by_projection genescaffold:gadMor1:GeneScaffold_2286:11780:19411:-1 gene:ENSGMOG00000005215 transcript:ENSGMOT00000005704 gene_biotype:protein_coding transcript_biotype:protein_coding	3.14942e+06	4.83125e+06	2.29733e+06	2.92585e+06	3.82744e+06	3.46559e+06	1.57152e+06	3.07748e+06	2.68277e+06	2.87999e+06	3.13241e+06	2.9717e+06	2.48513e+06	2.71008e+06	2.27715e+06	5.6271e+06	2.49883e+06	2.66822e+06	2.62938e+06	1.91059e+06	2.33765e+06	4.3813e+06	4.14644e+06	2.79895e+06	4.23376e+06	2.22391e+06	1.61164e+06	2.15957e+06
ENSGMOP00000009874	1	1	100	0.333672	1.10219	2	Kontrol	pep:known_by_projection genescaffold:gadMor1:GeneScaffold_2050:29238:31799:-1 gene:ENSGMOG00000009247 transcript:ENSGMOT00000010138 gene_biotype:protein_coding transcript_biotype:protein_coding	52148	50973.4	40784.8	56181.2	57132.9	45364	44468.8	54429.7	47306.5	47029	52482.1	53801.7	50289.4	62746.2	52525.8	57281.5	60088	54718	47903.6	57413.5	46811.2	58733.1	49150.7	36989.3	50065.9	53311.6	42820.8	76719.5
ENSGMOP00000008152	23	21	3361.43	0.158748	1.29721	0,5	2	pep:known_by_projection genescaffold:gadMor1:GeneScaffold_2825:23820:32085:1 gene:ENSGMOG00000007613 transcript:ENSGMOT00000008385 gene_biotype:protein_coding transcript_biotype:protein_coding	1.64322e+07	1.48159e+07	2.59265e+07	2.64054e+07	1.87631e+07	1.67206e+07	2.09615e+07	2.55995e+07	2.56402e+07	2.09558e+07	1.94721e+07	1.44228e+07	1.52151e+07	1.85198e+07	1.35852e+07	1.44027e+07	1.77619e+07	2.7993e+07	2.17086e+07	3.11039e+07	1.99254e+07	2.21876e+07	1.24095e+07	1.8702e+07	3.90637e+07	2.56674e+07	2.02964e+07	2.21947e+07
ENSGMOP00000007632	2	2	298.98	0.276947	1.30734	2	Kontrol	pep:known_by_projection genescaffold:gadMor1:GeneScaffold_4543:62614:64616:1 gene:ENSGMOG00000007161 transcript:ENSGMOT00000007852 gene_biotype:protein_coding transcript_biotype:protein_coding	135613	146272	124302	102023	157815	116103	91308.5	157396	95258.2	76493.5	118332	102412	221495	181173	174487	202827	108198	154399	151641	68227.2	200113	121554	155533	242124	138947	114297	184595	56303.1
ENSGMOP00000015947	3	3	398.742	0.000389023	1.33031	2	Kontrol	pep:known_by_projection genescaffold:gadMor1:GeneScaffold_3373:551576:570678:1 gene:ENSGMOG00000014869 transcript:ENSGMOT00000016355 gene_biotype:protein_coding transcript_biotype:protein_coding	163652	141787	199261	180031	156665	106181	167030	201264	158689	154523	196965	187880	205131	218269	224935	210094	211941	267906	227344	156702	149607	169473	134909	177139	214377	152372	184396	182307
ENSGMOP00000009187	6	6	799.839	0.243572	1.08643	2	Kontrol	pep:known_by_projection genescaffold:gadMor1:GeneScaffold_2886:281041:292206:1 gene:ENSGMOG00000008581 transcript:ENSGMOT00000009436 gene_biotype:protein_coding transcript_biotype:protein_coding	504077	556649	410189	482490	549699	581124	466965	619060	485636	394575	507372	458846	587050	585239	544020	631408	547455	544681	532229	457532	563258	495595	545981	501803	551091	484207	585987	481400
ENSGMOP00000000896	3	3	299.88	0.00290595	1.93431	Kontrol	2	pep:known_by_projection genescaffold:gadMor1:GeneScaffold_76:11643:19832:-1 gene:ENSGMOG00000000870 transcript:ENSGMOT00000000931 gene_biotype:protein_coding transcript_biotype:protein_coding	171930	162618	130857	146829	101516	201501	146793	317285	135658	307683	171837	60184.8	83988.5	88905.2	67054	87903.5	98538.9	73099.1	116544	160618	128286	175327	282671	108918	196363	281022	102518	72986.6
ENSGMOP00000014558	1	1	100	0.445831	1.14352	2	0,5	pep:known_by_projection genescaffold:gadMor1:GeneScaffold_1869:148346:152151:-1 gene:ENSGMOG00000013626 transcript:ENSGMOT00000014932 gene_biotype:protein_coding transcript_biotype:protein_coding	89078.9	98867.8	67369	87624.9	114784	119492	105375	98986.3	112323	58884.9	109292	89413.1	101304	98067.9	101583	123476	146154	88325.6	75386.6	107941	113809	107587	65514.9	111309	85394.7	34297.8	87182.5	102871
ENSGMOP00000004974	4	4	500	0.328313	1.19712	2	0,5	pep:known_by_projection genescaffold:gadMor1:GeneScaffold_3576:30622:36122:-1 gene:ENSGMOG00000004690 transcript:ENSGMOT00000005119 gene_biotype:protein_coding transcript_biotype:protein_coding	203367	284157	446870	248013	246603	306757	132464	324980	151174	335738	277971	392736	294732	347955	272169	314259	217840	278497	257300	318457	173758	260454	457502	269191	254003	118298	199042	165831
ENSGMOP00000000557	3	3	296.975	0.477225	1.09933	2	Kontrol	pep:known_by_projection genescaffold:gadMor1:GeneScaffold_1906:6049:46898:1 gene:ENSGMOG00000000541 transcript:ENSGMOT00000000586 gene_biotype:protein_coding transcript_biotype:protein_coding	135194	145571	126546	151468	174621	167833	179092	163761	130116	114574	118549	216743	143781	152100	186742	171926	181651	143823	157679	142402	163934	163956	140492	153742	121032	186659	194576	137081
ENSGMOP00000019266	3	3	591.248	0.644884	1.06365	0,5	2	pep:known_by_projection genescaffold:gadMor1:GeneScaffold_1226:39035:43583:-1 gene:ENSGMOG00000017931 transcript:ENSGMOT00000019731 gene_biotype:protein_coding transcript_biotype:protein_coding	2.45341e+06	1.82978e+06	2.47958e+06	2.30768e+06	1.89096e+06	2.15229e+06	2.08313e+06	2.09127e+06	1.76146e+06	1.61128e+06	1.89103e+06	2.05157e+06	2.96603e+06	1.76906e+06	2.13828e+06	2.29695e+06	1.64751e+06	1.6757e+06	1.85609e+06	2.1196e+06	2.37065e+06	2.78484e+06	1.95896e+06	1.77444e+06	2.21736e+06	1.80759e+06	2.10091e+06	2.32215e+06
ENSGMOP00000010678;ENSGMOP00000015759	4	3	400	0.812795	1.21915	0,5	Kontrol	pep:novel genescaffold:gadMor1:GeneScaffold_2452:62369:62998:-1 gene:ENSGMOG00000009992 transcript:ENSGMOT00000010973 gene_biotype:protein_coding transcript_biotype:protein_coding	311856	456301	208072	346792	305680	328437	257896	126849	301965	600514	526688	424826	475506	344518	195639	260903	151332	470416	358674	475234	103525	361245	460827	215657	442732	828430	281840	390336
ENSGMOP00000014503	3	2	294.504	0.626412	1.12134	2	0,5	pep:known_by_projection genescaffold:gadMor1:GeneScaffold_1869:65092:72860:-1 gene:ENSGMOG00000013567 transcript:ENSGMOT00000014877 gene_biotype:protein_coding transcript_biotype:protein_coding	560434	585942	458234	569553	582586	383183	235528	501964	470835	424269	493798	513228	349451	524615	424875	701179	586249	568803	317854	468623	580132	507935	406423	382594	683772	293316	298364	374114
ENSGMOP00000004295	29	20	3787.51	0.738514	1.05401	2	Kontrol	pep:known_by_projection genescaffold:gadMor1:GeneScaffold_581:159249:172715:1 gene:ENSGMOG00000004056 transcript:ENSGMOT00000004427 gene_biotype:protein_coding transcript_biotype:protein_coding	1.23583e+07	1.37923e+07	2.10442e+07	1.60404e+07	1.53624e+07	1.465e+07	1.40689e+07	1.96147e+07	1.59183e+07	1.32108e+07	1.83455e+07	1.15465e+07	1.90135e+07	1.73735e+07	1.44615e+07	1.52968e+07	1.76553e+07	1.74287e+07	1.69184e+07	1.75861e+07	2.31362e+07	1.54669e+07	1.2598e+07	1.47636e+07	1.29957e+07	1.92031e+07	1.60648e+07	1.62008e+07
ENSGMOP00000022051	5	4	598.272	0.784308	1.03816	0,5	Kontrol	pep:known_by_projection genescaffold:gadMor1:GeneScaffold_2487:256636:257163:-1 gene:ENSGMOG00000020564 transcript:ENSGMOT00000022569 gene_biotype:protein_coding transcript_biotype:protein_coding	696169	532778	801846	636598	609374	607721	509689	688823	660853	631590	678215	600966	562245	738702	588546	760378	586569	776135	638881	752252	599839	670905	560102	591144	627403	594447	825459	735314
ENSGMOP00000015697	7	6	799.6	0.793097	1.06777	Kontrol	0,5	pep:known_by_projection genescaffold:gadMor1:GeneScaffold_1320:71189:101438:-1 gene:ENSGMOG00000014643 transcript:ENSGMOT00000016098 gene_biotype:protein_coding transcript_biotype:protein_coding	1.045e+06	1.07405e+06	862748	1.36328e+06	928192	928974	1.13985e+06	1.74385e+06	1.14876e+06	1.21781e+06	1.40557e+06	959272	931496	1.09652e+06	1.07967e+06	772573	1.3392e+06	1.279e+06	958077	1.08932e+06	900816	1.16483e+06	1.30019e+06	961548	1.15201e+06	1.00889e+06	919097	1.15634e+06
ENSGMOP00000003465;ENSGMOP00000004102;ENSGMOP00000005554;ENSGMOP00000006202;ENSGMOP00000010113;ENSGMOP00000012836;ENSGMOP00000021200;ENSGMOP00000021390;ENSGMOP00000021646;ENSGMOP00000021659;ENSGMOP00000021665;ENSGMOP00000021688;ENSGMOP00000021690;ENSGMOP00000021857;ENSGMOP00000021924	8	2	1399.08	0.417963	1.43831	2	Kontrol	pep:known_by_projection genescaffold:gadMor1:GeneScaffold_2583:15365:18281:-1 gene:ENSGMOG00000003292 transcript:ENSGMOT00000003567 gene_biotype:protein_coding transcript_biotype:protein_coding	31278.8	7552.74	14314.3	1262.66	31420.6	1701.98	12542.8	2603.38	1398.43	7576.75	2452.05	6108.22	14856.6	17748.1	12398.1	27462.3	6651.18	43305.7	13549.6	3437.2	3205.68	1999.23	17013.1	61024.5	22809.8	4931.92	12234.4	6643.51
ENSGMOP00000003296	1	1	100	0.711887	1.24859	Kontrol	2	pep:known_by_projection genescaffold:gadMor1:GeneScaffold_4639:132:51944:-1 gene:ENSGMOG00000003110 transcript:ENSGMOT00000003398 gene_biotype:protein_coding transcript_biotype:protein_coding	23704.1	15604.2	5915.16	17418.6	18465.4	8385.38	9379.45	24450.2	14706	11115.3	7065.47	4881.2	12544.6	15041.7	11281.9	14230.7	9236.43	18328.5	14893.9	7195.64	15650.2	9461.98	18654.7	23005.2	26041.7	13224.5	11371	2117.48
ENSGMOP00000011567;ENSGMOP00000011634	1	1	200	0.094433	2.63944	0,5	2	pep:known_by_projection genescaffold:gadMor1:GeneScaffold_4546:19352:22511:-1 gene:ENSGMOG00000010772 transcript:ENSGMOT00000011882 gene_biotype:protein_coding transcript_biotype:protein_coding	11083.9	18329.7	14613.6	43932.6	26692.2	7855.58	46729.9	16572.9	48599.2	73036.2	3442.03	8688.1	12529.6	1366.04	4013.59	14244.4	9092.3	45938.3	14872.5	106382	28813.4	15425.3	8290.4	1096.28	33917.8	79931.9	9784.17	17748.2
ENSGMOP00000009952	4	3	691.707	0.124383	1.16598	Kontrol	2	pep:known_by_projection genescaffold:gadMor1:GeneScaffold_322:234383:241129:1 gene:ENSGMOG00000009319 transcript:ENSGMOT00000010220 gene_biotype:protein_coding transcript_biotype:protein_coding	1.45317e+06	1.1971e+06	2.3629e+06	1.6238e+06	1.43915e+06	1.40271e+06	1.41286e+06	1.53888e+06	1.56227e+06	1.53431e+06	1.41453e+06	1.48071e+06	1.16156e+06	1.26426e+06	1.25439e+06	1.26828e+06	1.45995e+06	1.30731e+06	1.37419e+06	2.05545e+06	1.63158e+06	1.61805e+06	1.2397e+06	1.4196e+06	1.44307e+06	1.21954e+06	1.2704e+06	1.47342e+06
ENSGMOP00000020783	1	1	100	0.0403476	1.62478	Kontrol	2	pep:known_by_projection genescaffold:gadMor1:GeneScaffold_2632:354184:358548:1 gene:ENSGMOG00000019331 transcript:ENSGMOT00000021290 gene_biotype:protein_coding transcript_biotype:protein_coding	92527	47224.1	112172	77424.7	60802.8	60636.4	24447	92728.6	94290.8	84586.4	45650.2	29661	38008.7	37737.2	41474.1	63299.2	42746.5	61546.5	53566.7	87965.3	80812.8	74414.6	62836.5	45768.1	93646.8	41134.4	70608.1	34867.1
ENSGMOP00000004832	16	15	2279.69	0.219548	1.10151	Kontrol	2	pep:known_by_projection genescaffold:gadMor1:GeneScaffold_73:65689:84039:-1 gene:ENSGMOG00000004536 transcript:ENSGMOT00000004973 gene_biotype:protein_coding transcript_biotype:protein_coding	3.53241e+06	3.71143e+06	4.10839e+06	4.12469e+06	4.07524e+06	4.23174e+06	4.32471e+06	4.59578e+06	4.15868e+06	3.47545e+06	3.14318e+06	4.14286e+06	3.50921e+06	3.34841e+06	3.7428e+06	3.85833e+06	4.08539e+06	3.48324e+06	3.64565e+06	4.36465e+06	4.75217e+06	4.08605e+06	3.00283e+06	4.24508e+06	3.49118e+06	3.12077e+06	4.50567e+06	3.82257e+06
ENSGMOP00000005855	18	15	2695.93	0.824254	1.05778	Kontrol	0,5	pep:known_by_projection genescaffold:gadMor1:GeneScaffold_515:95640:108132:1 gene:ENSGMOG00000005500 transcript:ENSGMOT00000006028 gene_biotype:protein_coding transcript_biotype:protein_coding	9.48383e+06	7.88919e+06	1.26528e+07	1.25379e+07	8.0755e+06	6.89347e+06	8.53082e+06	1.271e+07	1.15189e+07	8.72728e+06	9.34283e+06	7.87292e+06	9.01851e+06	9.27055e+06	8.34418e+06	8.29135e+06	9.82177e+06	1.19567e+07	1.06787e+07	1.29523e+07	8.61323e+06	1.18795e+07	6.87766e+06	8.38607e+06	8.80193e+06	1.08365e+07	6.46344e+06	9.43933e+06
ENSGMOP00000009133	6	6	699.031	0.213266	1.30459	Kontrol	2	pep:known_by_projection genescaffold:gadMor1:GeneScaffold_1321:167597:175767:1 gene:ENSGMOG00000008529 transcript:ENSGMOT00000009382 gene_biotype:protein_coding transcript_biotype:protein_coding	4.54682e+06	3.56903e+06	4.28685e+06	2.68207e+06	3.08225e+06	3.41743e+06	2.69086e+06	3.47874e+06	2.75118e+06	6.36071e+06	4.24044e+06	2.23315e+06	2.27166e+06	2.89298e+06	2.12041e+06	2.26064e+06	3.08791e+06	2.95167e+06	3.37397e+06	3.6357e+06	3.06936e+06	4.11806e+06	5.77703e+06	1.97291e+06	3.52735e+06	5.14972e+06	2.21173e+06	1.97233e+06
ENSGMOP00000012237	16	2	2597.1	0.828654	1.13918	Kontrol	0,5	pep:known_by_projection genescaffold:gadMor1:GeneScaffold_2026:187345:189423:-1 gene:ENSGMOG00000011450 transcript:ENSGMOT00000012564 gene_biotype:protein_coding transcript_biotype:protein_coding	127194	101391	39006.2	109482	69179.4	38923.5	69151	101222	96893.8	55064.3	82741.9	73439.5	72163	71981.6	63536.8	78896.9	75018.6	81613.8	47406.5	91289.1	72614.6	88312.3	40500.4	48384.8	82716	88307.5	61416.1	64422
ENSGMOP00000015169	2	2	298.739	0.736346	1.06149	2	Kontrol	pep:known_by_projection genescaffold:gadMor1:GeneScaffold_4351:420:4790:1 gene:ENSGMOG00000014211 transcript:ENSGMOT00000015559 gene_biotype:protein_coding transcript_biotype:protein_coding	76617.9	69119.5	66134.8	84408	43662	98283.5	105410	94207.9	67296.9	226846	104636	73539.2	121047	85829	71781.1	108054	96582.5	160337	68559.9	108446	78258	110583	156819	59835.4	72633	129131	65008.1	102984
ENSGMOP00000002192	5	4	800	0.761487	1.03508	2	0,5	pep:known_by_projection genescaffold:gadMor1:GeneScaffold_1544:112277:116681:-1 gene:ENSGMOG00000002050 transcript:ENSGMOT00000002262 gene_biotype:protein_coding transcript_biotype:protein_coding	1.2543e+06	1.20709e+06	1.62132e+06	1.40868e+06	1.29828e+06	1.09486e+06	1.22689e+06	1.37543e+06	1.25757e+06	1.02835e+06	1.277e+06	1.37333e+06	1.08883e+06	1.19281e+06	1.38401e+06	1.40273e+06	1.38839e+06	1.14764e+06	1.25803e+06	1.36652e+06	1.42599e+06	1.26875e+06	1.07531e+06	1.17214e+06	1.41345e+06	861258	1.18525e+06	1.35392e+06
ENSGMOP00000005227	1	1	100	0.0362186	1.68834	2	Kontrol	pep:known_by_projection genescaffold:gadMor1:GeneScaffold_3253:127585:156856:-1 gene:ENSGMOG00000004881 transcript:ENSGMOT00000005385 gene_biotype:protein_coding transcript_biotype:protein_coding	9566.86	6760.58	2689.69	5793.08	9811.67	4811.37	4351.39	6343.15	4116.82	1660.82	6161.02	6351.78	9471.71	11409.7	13245.3	13342.8	7463.9	9219.96	8282.58	1861.96	6724.32	4405.02	5194.66	10777.1	4927.19	7324.83	14220.6	3990.59
ENSGMOP00000020369	5	5	500	0.666776	1.12374	0,5	Kontrol	pep:known_by_projection genescaffold:gadMor1:GeneScaffold_1995:17128:42418:-1 gene:ENSGMOG00000018943 transcript:ENSGMOT00000020869 gene_biotype:protein_coding transcript_biotype:protein_coding	452367	432262	526152	544572	511883	426454	633003	523251	556215	325177	641655	896628	505049	484332	541688	444564	518507	436399	518356	675172	457181	452799	283475	422633	392426	754633	691844	857236
ENSGMOP00000004428	3	3	300	0.621735	1.11516	Kontrol	2	pep:known_by_projection genescaffold:gadMor1:GeneScaffold_2482:70792:75969:-1 gene:ENSGMOG00000004173 transcript:ENSGMOT00000004563 gene_biotype:protein_coding transcript_biotype:protein_coding	469544	373289	407792	732575	532367	565109	654861	582070	842052	486691	181674	514097	555209	550764	523199	518828	555085	498452	659638	521068	486126	467926	346774	542053	420632	503952	664977	694515
ENSGMOP00000004141;ENSGMOP00000021197;ENSGMOP00000021199;ENSGMOP00000021203;ENSGMOP00000021236;ENSGMOP00000021245;ENSGMOP00000021373;ENSGMOP00000021389;ENSGMOP00000021416;ENSGMOP00000021433;ENSGMOP00000021501;ENSGMOP00000021502;ENSGMOP00000021522;ENSGMOP00000021539;ENSGMOP00000021648;ENSGMOP00000021689;ENSGMOP00000021775;ENSGMOP00000021875;ENSGMOP00000021876;ENSGMOP00000021921;ENSGMOP00000021974;…	11	10	2091.32	0.597653	1.10709	Kontrol	2	pep:known_by_projection genescaffold:gadMor1:GeneScaffold_1589:40445:45459:1 gene:ENSGMOG00000003924 transcript:ENSGMOT00000004269 gene_biotype:protein_coding transcript_biotype:protein_coding	1.99369e+07	1.84017e+07	1.78567e+07	1.85923e+07	1.62516e+07	1.54776e+07	2.10753e+07	2.34098e+07	1.75403e+07	1.55792e+07	8.35536e+06	1.82934e+07	1.23318e+07	1.37774e+07	2.0665e+07	2.53322e+07	1.89791e+07	1.51788e+07	1.67668e+07	2.13557e+07	2.25152e+07	2.36722e+07	1.92372e+07	1.91119e+07	1.36353e+07	6.76006e+06	1.65249e+07	1.69951e+07
ENSGMOP00000019050	9	4	1490.85	0.46678	1.1591	Kontrol	2	pep:known_by_projection genescaffold:gadMor1:GeneScaffold_241:34621:49044:-1 gene:ENSGMOG00000017712 transcript:ENSGMOT00000019510 gene_biotype:protein_coding transcript_biotype:protein_coding	911216	729034	1.29149e+06	903889	1.05975e+06	939974	1.01145e+06	1.42753e+06	843096	542304	785270	915514	878387	605620	813706	801724	1.06731e+06	692038	940879	918849	1.16423e+06	959023	669099	946139	681556	743899	1.11411e+06	855913
ENSGMOP00000002227	1	1	100	0.438799	1.16637	2	Kontrol	pep:known_by_projection genescaffold:gadMor1:GeneScaffold_3167:21740:34529:-1 gene:ENSGMOG00000002071 transcript:ENSGMOT00000002299 gene_biotype:protein_coding transcript_biotype:protein_coding	34700	45979.5	13924.9	43452.4	38919.4	42537.5	32268.3	50350.1	37886.4	37217.3	32716.7	29835.7	54294.7	52703.8	45483.6	53821.9	45944.8	41118.7	40076.2	24209.7	32713.3	33452.3	42574	47029	47987.6	55666.9	55589.6	27393.2
ENSGMOP00000012561	3	2	398.603	0.113113	1.13623	2	Kontrol	pep:known_by_projection genescaffold:gadMor1:GeneScaffold_3614:17396:28447:1 gene:ENSGMOG00000011741 transcript:ENSGMOT00000012892 gene_biotype:protein_coding transcript_biotype:protein_coding	222877	202573	155678	201594	240160	164531	166206	201790	182817	141533	194441	231396	178842	224995	203911	246281	214121	230897	197377	171318	180168	194136	171334	219007	247573	171563	215506	179506
ENSGMOP00000013304	1	1	100	0.653777	1.07453	2	0,5	pep:known_by_projection genescaffold:gadMor1:GeneScaffold_299:1260389:1270325:1 gene:ENSGMOG00000012428 transcript:ENSGMOT00000013658 gene_biotype:protein_coding transcript_biotype:protein_coding	52956.8	42783.9	24846.8	43698.2	40452.7	33477.7	28217.1	49865.7	49150.7	23653.3	51907	46173.7	48137.7	49568.2	29156.2	33963.2	30883.1	40605.3	34243.7	38157.8	27747.9	12123.9	23012.8	31955.3	56571.5	67349.8	48993.4	33433.4
ENSGMOP00000009650;ENSGMOP00000015243	1	1	100	0.813829	1.05212	Kontrol	0,5	pep:known_by_projection genescaffold:gadMor1:GeneScaffold_4493:148383:171279:1 gene:ENSGMOG00000009021 transcript:ENSGMOT00000009910 gene_biotype:protein_coding transcript_biotype:protein_coding	41766.4	35238.5	20387.5	46268.2	47157.6	34812.7	42873.9	54014.8	41164.3	22663.4	25183.1	32114.9	38358.4	46023.4	41495.4	42911.1	41229	29976.7	37703.6	7971.02	41867	37274.1	34570.8	48771.9	39896.2	31414.9	47661.7	41059
ENSGMOP00000006071	10	3	1199.49	0.366403	1.1646	2	Kontrol	pep:known_by_projection genescaffold:gadMor1:GeneScaffold_3945:145210:187352:-1 gene:ENSGMOG00000005651 transcript:ENSGMOT00000006246 gene_biotype:protein_coding transcript_biotype:protein_coding	238231	139323	220432	141446	167657	72554.5	98260.6	162658	107966	96505.1	174404	147038	120346	169513	264368	195257	148570	143657	151439	104994	180057	141397	122783	155113	156250	131453	226337	133811
ENSGMOP00000021934	6	3	1080.95	0.759001	1.08592	Kontrol	2	pep:known_by_projection genescaffold:gadMor1:GeneScaffold_4254:45420:45947:-1 gene:ENSGMOG00000020447 transcript:ENSGMOT00000022452 gene_biotype:protein_coding transcript_biotype:protein_coding	1.63581e+06	1.56092e+06	2.64154e+06	1.32263e+06	1.80527e+06	1.43328e+06	1.13608e+06	1.47831e+06	1.25038e+06	1.07217e+06	1.98862e+06	1.7241e+06	1.10931e+06	1.29228e+06	1.29836e+06	1.63346e+06	1.22515e+06	1.15277e+06	1.28656e+06	1.91133e+06	1.56198e+06	1.47928e+06	1.49706e+06	1.22588e+06	1.62721e+06	1.11529e+06	1.09187e+06	1.26792e+06
ENSGMOP00000018543	9	7	1297.5	0.823403	1.08622	Kontrol	0,5	pep:known_by_projection genescaffold:gadMor1:GeneScaffold_1037:286997:298173:-1 gene:ENSGMOG00000017246 transcript:ENSGMOT00000018998 gene_biotype:protein_coding transcript_biotype:protein_coding	3.34642e+06	5.30299e+06	6.2494e+06	3.50296e+06	4.67634e+06	4.88807e+06	3.16396e+06	3.46278e+06	2.68847e+06	2.79933e+06	3.91414e+06	3.16584e+06	3.54575e+06	3.81297e+06	4.11247e+06	4.27497e+06	4.76172e+06	2.66472e+06	3.34622e+06	3.97753e+06	3.63098e+06	2.92603e+06	5.55777e+06	2.91565e+06	3.52818e+06	3.56344e+06	3.40779e+06	3.70182e+06
ENSGMOP00000017340	1	1	99.8799	0.0370843	1.82439	2	Kontrol	pep:known_by_projection genescaffold:gadMor1:GeneScaffold_169:240480:254223:1 gene:ENSGMOG00000016142 transcript:ENSGMOT00000017770 gene_biotype:protein_coding transcript_biotype:protein_coding	8136.2	10142.1	8737.69	3313.99	15716.3	12884.8	6873.16	9244.86	7071.92	7854.56	7997.64	13911.5	16894.3	19544.8	17127.6	19600.6	17257.3	20678.7	14723.3	4243.34	13014.1	7178.48	13517.9	16066.2	15119.3	19430.7	15293.6	1928.83
ENSGMOP00000003089	3	2	299.658	0.694571	1.06816	Kontrol	2	pep:known_by_projection genescaffold:gadMor1:GeneScaffold_2562:107107:138378:1 gene:ENSGMOG00000002921 transcript:ENSGMOT00000003186 gene_biotype:protein_coding transcript_biotype:protein_coding	437868	377666	390485	469508	361477	318192	324166	405662	338526	537020	320089	326444	362338	422118	452391	413107	372666	325956	341944	315599	404136	498405	453694	336787	392911	340748	290704	382713
ENSGMOP00000012748	4	3	400	0.839519	1.04719	Kontrol	0,5	pep:known_by_projection genescaffold:gadMor1:GeneScaffold_1619:117060:127236:1 gene:ENSGMOG00000011912 transcript:ENSGMOT00000013085 gene_biotype:protein_coding transcript_biotype:protein_coding	318736	327325	349313	263424	403622	303079	307119	388394	281086	222517	268428	394353	284330	312119	339856	332394	295941	265158	284209	259896	388234	280126	279566	330794	295211	270107	354625	261253
ENSGMOP00000008637	4	4	400	0.726239	1.09751	0,5	2	pep:known_by_projection genescaffold:gadMor1:GeneScaffold_2123:4582:14554:1 gene:ENSGMOG00000008070 transcript:ENSGMOT00000008879 gene_biotype:protein_coding transcript_biotype:protein_coding	640997	577604	499780	515831	489448	556600	527390	679923	724721	364770	667100	575408	600456	499949	432742	542082	469607	561375	535383	576343	549229	599303	532698	471267	826823	875550	530253	398901
ENSGMOP00000006069	1	1	100	0.776629	1.09952	0,5	Kontrol	pep:known_by_projection genescaffold:gadMor1:GeneScaffold_51:59:11640:-1 gene:ENSGMOG00000005718 transcript:ENSGMOT00000006244 gene_biotype:protein_coding transcript_biotype:protein_coding	69213.3	73101	69390.5	85075.1	63981.8	78767.1	80707.2	58675.9	61069.9	58592.6	69145.4	60545.6	93755.9	74081	59690.7	73320.2	88444.9	78411.8	72398.3	143607	81119.2	76595.1	59130.5	50463.9	68076.7	54778.2	83121.9	74394.2
ENSGMOP00000018060	2	1	199.892	0.322696	1.29922	2	Kontrol	pep:known_by_projection genescaffold:gadMor1:GeneScaffold_802:10010:15248:-1 gene:ENSGMOG00000016761 transcript:ENSGMOT00000018505 gene_biotype:protein_coding transcript_biotype:protein_coding	16210.6	48096.2	11298	36588.3	37865.6	46070.1	26461.4	25782.8	36103.5	23455.8	43942.6	31346.4	57749.5	52705.9	42119.4	48723.3	31246.9	33743.6	18487.3	21825.9	34310.2	24834.7	46432.6	43599.2	38060.3	12422.5	48072.8	37671.6
ENSGMOP00000006666;ENSGMOP00000006672	1	1	100	0.801041	1.05337	Kontrol	0,5	pep:known_by_projection genescaffold:gadMor1:GeneScaffold_2546:429331:436487:1 gene:ENSGMOG00000006126 transcript:ENSGMOT00000006859 gene_biotype:protein_coding transcript_biotype:protein_coding	53772.6	62321.2	30126.3	39764.8	34789.2	64397.2	31698.1	55020.5	43191.5	51211.5	34797.1	39089.8	36568.7	63469.1	63282.5	45321.6	55712.7	33444.5	45852.1	18461.2	39510.8	38372.2	65113.4	57732.7	24354.6	52537.6	52846.3	49471.2
ENSGMOP00000013894	4	3	499.515	0.695134	1.06428	Kontrol	2	pep:known_by_projection genescaffold:gadMor1:GeneScaffold_3761:288079:290198:-1 gene:ENSGMOG00000012997 transcript:ENSGMOT00000014256 gene_biotype:protein_coding transcript_biotype:protein_coding	1.16943e+06	893439	1.14729e+06	1.18681e+06	963417	812571	1.04622e+06	1.36935e+06	1.182e+06	878007	960664	1.08897e+06	786628	960411	1.14722e+06	970120	1.20145e+06	1.02072e+06	868689	1.21154e+06	938501	1.36976e+06	944863	844656	1.02046e+06	968059	941597	943815
ENSGMOP00000011502	8	7	991.247	0.658825	1.08333	0,5	2	pep:known_by_projection genescaffold:gadMor1:GeneScaffold_3139:65420:72171:1 gene:ENSGMOG00000010754 transcript:ENSGMOT00000011814 gene_biotype:protein_coding transcript_biotype:protein_coding	1.46853e+06	1.48164e+06	1.64513e+06	1.49693e+06	1.67493e+06	1.38693e+06	1.76418e+06	1.30389e+06	1.60321e+06	1.11424e+06	1.52822e+06	2.48393e+06	1.33629e+06	1.21364e+06	1.41455e+06	1.25845e+06	1.46933e+06	1.25065e+06	1.29376e+06	2.16023e+06	1.7348e+06	1.82763e+06	1.0083e+06	1.5768e+06	1.34839e+06	1.81428e+06	1.50579e+06	1.37667e+06
ENSGMOP00000000359	5	4	699.167	0.523379	1.16218	2	Kontrol	pep:known_by_projection genescaffold:gadMor1:GeneScaffold_4537:20290:24514:-1 gene:ENSGMOG00000000365 transcript:ENSGMOT00000000381 gene_biotype:protein_coding transcript_biotype:protein_coding	231688	281385	265969	261651	333802	220732	318664	302605	494663	237010	412898	206673	322465	465151	227345	272565	322382	478513	375674	318123	265622	361258	251976	381550	229051	494403	307921	242564
ENSGMOP00000016037	7	7	798.679	0.844198	1.02856	Kontrol	0,5	pep:known_by_projection genescaffold:gadMor1:GeneScaffold_1701:227506:246133:1 gene:ENSGMOG00000014955 transcript:ENSGMOT00000016446 gene_biotype:protein_coding transcript_biotype:protein_coding	1.61307e+06	1.86594e+06	1.67491e+06	2.13411e+06	2.03472e+06	1.73498e+06	1.91208e+06	2.13211e+06	2.14072e+06	1.71915e+06	1.77351e+06	2.30319e+06	1.74871e+06	1.89035e+06	1.8608e+06	1.60536e+06	1.88097e+06	1.98937e+06	1.72837e+06	2.11999e+06	1.88973e+06	1.74579e+06	1.23642e+06	1.93705e+06	1.86399e+06	1.82256e+06	2.24577e+06	1.73047e+06
ENSGMOP00000015897	24	22	3877.95	0.842845	1.0559	Kontrol	0,5	pep:known_by_projection genescaffold:gadMor1:GeneScaffold_3633:150254:152297:1 gene:ENSGMOG00000014842 transcript:ENSGMOT00000016301 gene_biotype:protein_coding transcript_biotype:protein_coding	1.02448e+08	9.52023e+07	1.47224e+08	1.73995e+08	9.53968e+07	9.82504e+07	9.2718e+07	1.35089e+08	1.47445e+08	9.56678e+07	1.36323e+08	8.50537e+07	1.1455e+08	1.20244e+08	9.12603e+07	8.71959e+07	1.14956e+08	1.38601e+08	1.25976e+08	1.69395e+08	1.3701e+08	1.16908e+08	5.87912e+07	9.81729e+07	1.12063e+08	1.19587e+08	8.26425e+07	1.14133e+08
ENSGMOP00000014798	18	17	2465.51	0.755503	1.07722	0,5	2	pep:known_by_projection genescaffold:gadMor1:GeneScaffold_4417:24847:31380:-1 gene:ENSGMOG00000013840 transcript:ENSGMOT00000015179 gene_biotype:protein_coding transcript_biotype:protein_coding	1.07461e+07	1.15204e+07	1.56361e+07	1.79386e+07	1.51847e+07	1.41417e+07	1.46484e+07	1.57792e+07	1.65758e+07	1.14105e+07	1.57443e+07	1.30354e+07	1.54646e+07	1.50554e+07	1.31212e+07	1.12682e+07	1.30751e+07	1.54926e+07	1.44695e+07	1.63332e+07	1.84376e+07	1.45054e+07	8.97686e+06	1.35993e+07	1.32062e+07	1.86859e+07	1.71756e+07	1.55925e+07
ENSGMOP00000010823	20	5	2594.06	0.601603	1.12547	0,5	2	pep:known_by_projection genescaffold:gadMor1:GeneScaffold_2801:167654:178631:-1 gene:ENSGMOG00000010121 transcript:ENSGMOT00000011121 gene_biotype:protein_coding transcript_biotype:protein_coding	4.07084e+06	4.01563e+06	2.2253e+06	3.47559e+06	3.91422e+06	3.1126e+06	4.13467e+06	3.34417e+06	2.82156e+06	2.51321e+06	2.07634e+06	3.67587e+06	4.01339e+06	4.17806e+06	3.92165e+06	3.6476e+06	2.83436e+06	2.32574e+06	2.34146e+06	1.88266e+06	4.66567e+06	4.06046e+06	3.45396e+06	4.56431e+06	3.20216e+06	3.31407e+06	3.85758e+06	3.65399e+06
ENSGMOP00000018528	1	1	198.799	0.111937	1.3227	Kontrol	2	pep:known_by_projection genescaffold:gadMor1:GeneScaffold_2230:204382:210292:1 gene:ENSGMOG00000017256 transcript:ENSGMOT00000018983 gene_biotype:protein_coding transcript_biotype:protein_coding	328269	276989	445770	292197	305424	289216	280346	293909	249356	624793	385494	269410	169246	265631	206956	215530	251446	271912	268479	478250	286772	269050	355707	230914	392519	398779	221035	206001
ENSGMOP00000007001	1	1	100	0.600711	1.10771	0,5	2	pep:known_by_projection genescaffold:gadMor1:GeneScaffold_293:1624746:1686877:1 gene:ENSGMOG00000006545 transcript:ENSGMOT00000007203 gene_biotype:protein_coding transcript_biotype:protein_coding	692018	883888	1.1603e+06	1.12967e+06	921718	940052	1.12518e+06	995503	1.10858e+06	860822	964280	970668	902874	973367	886733	813606	1.07211e+06	961950	900798	1.45154e+06	966856	1.12003e+06	621025	942765	1.0481e+06	1.15946e+06	888055	1.15835e+06
ENSGMOP00000002148	1	1	100	0.633788	1.211	Kontrol	2	pep:known_by_projection genescaffold:gadMor1:GeneScaffold_2890:10443:96279:-1 gene:ENSGMOG00000002006 transcript:ENSGMOT00000002217 gene_biotype:protein_coding transcript_biotype:protein_coding	129820	148137	182098	109498	101698	140807	106174	115287	104457	328307	105394	64041.7	153348	138682	119539	118455	130234	141151	118879	84292.5	89794.2	172037	242810	81014.2	101830	180105	128189	125144
ENSGMOP00000012081	11	10	1699.94	0.747257	1.08848	0,5	2	pep:known_by_projection genescaffold:gadMor1:GeneScaffold_377:141255:142199:-1 gene:ENSGMOG00000011301 transcript:ENSGMOT00000012407 gene_biotype:protein_coding transcript_biotype:protein_coding	2.19411e+06	2.02936e+06	4.32845e+06	3.29597e+06	3.21191e+06	2.32748e+06	2.69138e+06	2.88009e+06	3.17912e+06	2.40512e+06	3.21797e+06	2.319e+06	2.53531e+06	3.31086e+06	2.29205e+06	2.31459e+06	2.77566e+06	3.49378e+06	2.68573e+06	3.67783e+06	2.484e+06	3.03206e+06	1.89936e+06	2.95361e+06	3.35484e+06	3.73089e+06	2.3472e+06	3.67227e+06
ENSGMOP00000003676	6	5	776.121	0.642648	1.04143	2	0,5	pep:known_by_projection genescaffold:gadMor1:GeneScaffold_4588:3499:5398:-1 gene:ENSGMOG00000003479 transcript:ENSGMOT00000003786 gene_biotype:protein_coding transcript_biotype:protein_coding	1.1238e+06	1.11241e+06	1.23628e+06	1.30489e+06	995576	1.1499e+06	1.20878e+06	1.26844e+06	995706	1.32356e+06	1.07663e+06	1.27773e+06	1.297e+06	1.15199e+06	1.12365e+06	1.26382e+06	1.14641e+06	1.31492e+06	1.05469e+06	1.17904e+06	1.23929e+06	1.12757e+06	1.25819e+06	977092	1.04817e+06	1.20511e+06	1.05643e+06	1.18999e+06
ENSGMOP00000008436	1	1	100	0.36579	1.45257	2	Kontrol	pep:known_by_projection genescaffold:gadMor1:GeneScaffold_1288:2622456:2636164:-1 gene:ENSGMOG00000007885 transcript:ENSGMOT00000008674 gene_biotype:protein_coding transcript_biotype:protein_coding	4412.02	6406.33	1691.07	2333.45	3726.18	4297.55	257.524	2082.33	911.582	2014.06	5746.95	1656.44	4021.45	5872.63	4188.64	8875.56	1519.32	2718.7	2177.86	1314.45	1506.11	2672.57	4466.14	4101.74	7234.18	3020.25	2658.35	890.478
ENSGMOP00000004045	2	2	200	0.473161	1.11996	2	0,5	pep:known_by_projection genescaffold:gadMor1:GeneScaffold_2454:10525:12349:-1 gene:ENSGMOG00000003821 transcript:ENSGMOT00000004168 gene_biotype:protein_coding transcript_biotype:protein_coding	16911.9	19108.8	31569.9	19747.9	19838.2	16360.7	15151.6	20167.1	17663.1	16565.2	25645.2	21820.9	19328.8	16534.4	21939.4	25376.6	20396.7	14228.1	19418.8	21407.4	15796.3	16413.3	14253.7	16785.9	13523.4	22948.9	17766.4	26011.2
ENSGMOP00000018936	3	2	482.299	0.32894	1.17583	2	Kontrol	pep:known_by_projection genescaffold:gadMor1:GeneScaffold_1936:784536:785067:-1 gene:ENSGMOG00000017623 transcript:ENSGMOT00000019395 gene_biotype:protein_coding transcript_biotype:protein_coding	749230	1.16412e+06	1.13032e+06	1.40915e+06	1.03534e+06	1.9024e+06	1.76598e+06	905944	1.33274e+06	1.66438e+06	990962	1.78158e+06	1.53443e+06	1.22798e+06	1.63483e+06	1.53756e+06	2.09809e+06	1.43049e+06	1.58439e+06	1.25824e+06	1.06289e+06	1.39395e+06	1.2595e+06	1.50803e+06	951611	1.17053e+06	1.59017e+06	2.2825e+06
ENSGMOP00000017623	5	4	796.631	0.39742	1.29475	Kontrol	2	pep:known_by_projection genescaffold:gadMor1:GeneScaffold_1244:15219:18279:1 gene:ENSGMOG00000016416 transcript:ENSGMOT00000018057 gene_biotype:protein_coding transcript_biotype:protein_coding	1.88324e+06	1.52952e+06	2.0886e+06	1.26151e+06	1.07136e+06	1.16386e+06	1.16757e+06	1.60935e+06	1.2215e+06	3.78014e+06	1.79818e+06	755938	1.41145e+06	1.45498e+06	946286	1.03348e+06	1.27167e+06	1.35048e+06	1.63927e+06	1.76537e+06	1.19596e+06	1.94649e+06	1.8747e+06	873837	2.03197e+06	1.70092e+06	887194	1.15672e+06
ENSGMOP00000007101	2	2	199.88	0.241957	1.21799	2	0,5	pep:known_by_projection genescaffold:gadMor1:GeneScaffold_2182:418181:422208:-1 gene:ENSGMOG00000006675 transcript:ENSGMOT00000007304 gene_biotype:protein_coding transcript_biotype:protein_coding	341971	317957	273713	218674	330769	238343	240929	399281	282208	171470	257291	236103	301512	507520	344424	311760	259610	397733	291911	182218	279143	186601	257627	205675	348552	372051	340130	215434
ENSGMOP00000011656	1	1	198.412	0.00165587	2.84215	Kontrol	2	pep:known_by_projection genescaffold:gadMor1:GeneScaffold_2494:207938:244511:1 gene:ENSGMOG00000010891 transcript:ENSGMOT00000011972 gene_biotype:protein_coding transcript_biotype:protein_coding	5.76957e+06	3.3045e+06	1.53034e+07	3.38389e+06	2.58337e+06	4.68595e+06	4.06254e+06	6.66797e+06	3.90066e+06	1.03834e+07	3.42544e+06	917268	2.84434e+06	2.00521e+06	1.51959e+06	2.37714e+06	1.46603e+06	2.26939e+06	2.18961e+06	8.50068e+06	4.98776e+06	4.96643e+06	1.30173e+07	3.22942e+06	4.01037e+06	5.89566e+06	1.98273e+06	1.72198e+06
ENSGMOP00000020017	45	42	5876.34	0.426219	1.10121	Kontrol	2	pep:known_by_projection genescaffold:gadMor1:GeneScaffold_4245:10096:75442:1 gene:ENSGMOG00000018591 transcript:ENSGMOT00000020508 gene_biotype:protein_coding transcript_biotype:protein_coding	8.67942e+06	7.83e+06	1.10209e+07	1.01009e+07	9.16503e+06	7.22417e+06	1.01371e+07	1.27471e+07	9.65369e+06	9.21345e+06	8.23454e+06	7.69959e+06	7.62807e+06	9.19422e+06	8.84884e+06	8.74681e+06	1.03614e+07	9.21793e+06	8.34092e+06	1.23867e+07	9.21009e+06	9.53982e+06	6.8108e+06	8.35135e+06	9.1963e+06	8.61573e+06	8.49354e+06	1.0388e+07
ENSGMOP00000021944	1	1	100	0.845908	3.76935	0,5	Kontrol	pep:known genescaffold:gadMor1:GeneScaffold_275:94371:94775:1 gene:ENSGMOG00000020457 transcript:ENSGMOT00000022462 gene_biotype:protein_coding transcript_biotype:protein_coding	1026.24	2902.36	6031.8	147.166	3903.37	2143.44	4793.41	2020.99	6458.27	3617.21	2358.81	5572.27	3834.5	4797.21	2813.11	4475.84	4911.61	354.381	2434.29	851.62	3201.45	1289.12	5224.84	92062.2	1028.18	3534.6	1511.57	3396.1
ENSGMOP00000003437	1	1	100	0.851555	1.18748	0,5	Kontrol	pep:known_by_projection genescaffold:gadMor1:GeneScaffold_2766:6682:33100:-1 gene:ENSGMOG00000003215 transcript:ENSGMOT00000003539 gene_biotype:protein_coding transcript_biotype:protein_coding	57011.6	108784	73458.4	46002.7	63347.1	45350.1	53274.1	44637.5	66793.6	33796.8	57365.1	43667.7	109050	47548.2	65290.6	74720.7	69233.3	34646.2	54365.2	31463.6	103102	48950.4	83474.5	131400	28361.5	80647.5	78589.3	47188.6
ENSGMOP00000018422	3	3	500	0.618073	1.13759	Kontrol	2	pep:known_by_projection genescaffold:gadMor1:GeneScaffold_70:74:24516:1 gene:ENSGMOG00000017144 transcript:ENSGMOT00000018874 gene_biotype:protein_coding transcript_biotype:protein_coding	359256	515983	707383	537142	649443	554978	606012	488400	1.10871e+06	721196	761943	763536	396790	489097	379925	437432	409243	440023	865496	560930	474793	792647	470032	624704	858669	395713	618817	379131
ENSGMOP00000003787	3	3	299.88	0.17536	1.22839	2	Kontrol	pep:known_by_projection genescaffold:gadMor1:GeneScaffold_829:56129:60696:1 gene:ENSGMOG00000003570 transcript:ENSGMOT00000003901 gene_biotype:protein_coding transcript_biotype:protein_coding	214662	195174	200051	199810	199207	183503	171527	198563	151281	95105.1	247635	305630	199482	202828	261823	220574	221356	147353	193126	209458	242387	181071	134665	170474	117434	197865	227339	266368
ENSGMOP00000018578	1	1	200	0.844869	1.05846	Kontrol	0,5	pep:known_by_projection genescaffold:gadMor1:GeneScaffold_4617:298420:302320:1 gene:ENSGMOG00000017291 transcript:ENSGMOT00000019034 gene_biotype:protein_coding transcript_biotype:protein_coding	25186.4	27935.1	38645.1	37382.3	32016	21723.8	29514.5	30514	36788.4	19066.2	24503.7	32530.4	21608.9	28572.6	27314.6	28354	35392.6	27304.2	29705.1	31089.9	30719.9	35526.6	18856.5	28091.7	29605.4	20093.4	26469	33591.3
ENSGMOP00000020929	6	6	1099.93	0.798657	1.03618	0,5	Kontrol	pep:known_by_projection genescaffold:gadMor1:GeneScaffold_2611:25239:27352:1 gene:ENSGMOG00000019455 transcript:ENSGMOT00000021441 gene_biotype:protein_coding transcript_biotype:protein_coding	1.93586e+06	1.88638e+06	1.77742e+06	1.85045e+06	1.98795e+06	1.73528e+06	2.35626e+06	1.81955e+06	2.09576e+06	1.41599e+06	2.06411e+06	2.79877e+06	1.72639e+06	1.51507e+06	1.93156e+06	1.61046e+06	1.96616e+06	1.63948e+06	1.79499e+06	2.3863e+06	2.15592e+06	2.13698e+06	1.79151e+06	1.88055e+06	1.74961e+06	1.75342e+06	1.76242e+06	1.97232e+06
ENSGMOP00000005072	2	1	199.995	0.77557	1.04345	2	Kontrol	pep:known_by_projection genescaffold:gadMor1:GeneScaffold_3342:103209:111704:-1 gene:ENSGMOG00000004621 transcript:ENSGMOT00000005220 gene_biotype:protein_coding transcript_biotype:protein_coding	276332	259402	183467	266024	229195	219649	204089	246666	214682	241594	259719	299286	220654	191585	236969	280066	253890	263869	192495	239063	251727	270701	246412	201822	262094	213133	232988	253526
ENSGMOP00000009777	4	2	399.82	0.240711	1.27774	2	0,5	pep:known_by_projection genescaffold:gadMor1:GeneScaffold_4006:19590:25073:-1 gene:ENSGMOG00000009142 transcript:ENSGMOT00000010038 gene_biotype:protein_coding transcript_biotype:protein_coding	74676.4	130173	71928.3	87578.4	96897.4	108032	28906.8	65819.7	36498.9	49806.6	101834	89666.9	67530.2	64437.6	87539	110440	74139.2	117381	73631.1	53654.6	37476.3	96198.3	122747	45397.9	119443	40163.5	38911.2	61624.3
ENSGMOP00000010926	3	3	398.739	0.812171	1.0531	Kontrol	2	pep:novel genescaffold:gadMor1:GeneScaffold_329:351487:355601:1 gene:ENSGMOG00000010217 transcript:ENSGMOT00000011224 gene_biotype:protein_coding transcript_biotype:protein_coding	764776	795561	794710	802910	1.05079e+06	928734	939853	783733	886230	652038	638705	950513	803577	863839	838737	708792	806445	718333	849304	1.15369e+06	700867	700123	496441	764270	752485	609490	1.16969e+06	1.06182e+06
ENSGMOP00000012888	2	2	298.669	0.705998	1.1026	0,5	2	pep:known_by_projection genescaffold:gadMor1:GeneScaffold_3736:78545:81421:-1 gene:ENSGMOG00000012050 transcript:ENSGMOT00000013230 gene_biotype:protein_coding transcript_biotype:protein_coding	484367	476185	717939	710080	541193	473031	557277	573282	687311	496665	603771	640047	502773	480943	501629	482802	581507	549706	641146	863663	501616	752968	362657	529606	544996	676988	544842	718356
ENSGMOP00000015672	3	3	392.677	0.532335	1.10568	0,5	2	pep:known_by_projection genescaffold:gadMor1:GeneScaffold_3967:93572:111106:-1 gene:ENSGMOG00000014648 transcript:ENSGMOT00000016074 gene_biotype:protein_coding transcript_biotype:protein_coding	278233	241267	480143	361316	318186	353358	262961	320628	301522	252274	328997	271127	295970	282761	262283	260866	378199	280585	321435	394372	321687	409522	218953	315307	358526	303823	320554	322931
ENSGMOP00000012128	5	4	794.309	0.108186	1.20041	2	Kontrol	pep:known_by_projection scaffold:gadMor1:scaffold05520:32964:33505:-1 gene:ENSGMOG00000011341 transcript:ENSGMOT00000012454 gene_biotype:protein_coding transcript_biotype:protein_coding	4.58033e+06	4.91308e+06	2.81759e+06	6.25857e+06	4.27366e+06	6.89373e+06	4.56107e+06	3.38395e+06	4.66474e+06	5.24652e+06	5.00887e+06	4.65789e+06	6.71633e+06	5.65836e+06	6.17679e+06	5.43661e+06	6.50194e+06	5.97006e+06	5.29136e+06	4.55167e+06	3.28872e+06	5.98161e+06	4.4172e+06	5.035e+06	4.75364e+06	5.33095e+06	4.41402e+06	6.95361e+06
ENSGMOP00000006237;ENSGMOP00000021919	6	5	953.531	0.85554	1.03992	Kontrol	0,5	pep:known_by_projection genescaffold:gadMor1:GeneScaffold_3945:275765:297495:1 gene:ENSGMOG00000005862 transcript:ENSGMOT00000006418 gene_biotype:protein_coding transcript_biotype:protein_coding	1.69008e+06	1.54294e+06	1.31949e+06	1.80546e+06	1.83716e+06	1.53996e+06	2.20038e+06	1.72433e+06	1.72121e+06	1.20266e+06	1.34044e+06	2.38035e+06	1.39204e+06	1.45057e+06	1.8254e+06	1.58867e+06	1.69537e+06	1.55257e+06	1.43861e+06	1.91009e+06	1.97932e+06	1.75533e+06	1.2026e+06	1.82403e+06	1.36162e+06	935251	1.75405e+06	1.63006e+06
ENSGMOP00000013719	17	17	2866.96	0.0855175	1.27399	Kontrol	2	pep:known_by_projection genescaffold:gadMor1:GeneScaffold_633:44588:56673:-1 gene:ENSGMOG00000012815 transcript:ENSGMOT00000014080 gene_biotype:protein_coding transcript_biotype:protein_coding	9.70593e+06	8.62988e+06	1.32288e+07	1.68601e+07	1.1755e+07	1.09903e+07	1.10161e+07	1.49358e+07	1.70037e+07	9.60421e+06	1.24137e+07	7.41688e+06	9.49612e+06	1.04917e+07	8.48205e+06	7.3131e+06	8.57373e+06	1.05824e+07	1.26386e+07	1.51422e+07	1.27964e+07	1.35612e+07	6.89022e+06	1.04641e+07	1.38337e+07	1.10009e+07	1.05634e+07	1.05021e+07
ENSGMOP00000018261	3	2	399.399	0.279672	1.16039	2	Kontrol	pep:known_by_projection genescaffold:gadMor1:GeneScaffold_747:41464:42500:1 gene:ENSGMOG00000017012 transcript:ENSGMOT00000018709 gene_biotype:protein_coding transcript_biotype:protein_coding	373428	457546	351485	479736	498010	364816	417754	228082	430474	319181	546451	548612	499273	465744	399475	333666	352827	441805	506527	471136	298215	375054	376262	295169	432755	516857	423418	523527
ENSGMOP00000000495	1	1	100	0.526636	1.45278	Kontrol	2	pep:known_by_projection genescaffold:gadMor1:GeneScaffold_2861:102588:107982:-1 gene:ENSGMOG00000000501 transcript:ENSGMOT00000000523 gene_biotype:protein_coding transcript_biotype:protein_coding	16332.8	8333.63	14804.5	10160.3	17730.4	4646.62	5714.1	21702.9	10622.4	3306.56	9042.16	5248.09	7324.23	11358	8726.19	10699.6	4708.87	5835.63	7280.37	8404.91	13219.2	8229.19	7649.92	9505.38	19542	6957.89	7953.84	3411.73
ENSGMOP00000002820	7	5	893.333	0.198638	1.13805	Kontrol	2	pep:known genescaffold:gadMor1:GeneScaffold_155:82613:83641:1 gene:ENSGMOG00000002688 transcript:ENSGMOT00000002911 gene_biotype:protein_coding transcript_biotype:protein_coding	1.55474e+06	1.18759e+06	1.66627e+06	1.21897e+06	1.48097e+06	1.5991e+06	1.27756e+06	1.20261e+06	1.07802e+06	1.21959e+06	931323	1.07228e+06	1.18177e+06	1.26143e+06	1.26954e+06	1.29492e+06	1.004e+06	1.33044e+06	1.31888e+06	1.55399e+06	1.53852e+06	1.50467e+06	1.38828e+06	1.26522e+06	1.04422e+06	969208	1.21179e+06	1.22964e+06
ENSGMOP00000007604	1	1	100	0.20742	2.51497	0,5	2	pep:known_by_projection genescaffold:gadMor1:GeneScaffold_1775:135451:139000:-1 gene:ENSGMOG00000007145 transcript:ENSGMOT00000007822 gene_biotype:protein_coding transcript_biotype:protein_coding	20663.5	7120.25	508.62	2709.66	9387.41	14909.8	2957.26	10455.5	7895.44	2813.29	3922.58	439.827	2171.19	1937.77	2958.2	8984.79	474.621	7410.09	759.069	3430.83	6475.07	3694.42	434.245	1971.49	31983.2	8627.36	15650.3	813.392
ENSGMOP00000000563	1	1	100	0.144471	1.42109	2	Kontrol	pep:known_by_projection genescaffold:gadMor1:GeneScaffold_4536:56:54611:-1 gene:ENSGMOG00000000575 transcript:ENSGMOT00000000592 gene_biotype:protein_coding transcript_biotype:protein_coding	22940.5	8685.16	9098.51	21057.5	10814.9	20388.5	16710.9	24955.2	29922.8	14763.6	16090.1	12308.3	33633.7	32230.7	27522.3	28424.9	23144.9	28651.1	27363.8	8833.84	11463.8	12517.7	20573.1	19598.8	34101.4	29111.5	31818.3	15038.6
ENSGMOP00000018319	1	1	100	0.854838	1.07869	0,5	Kontrol	pep:known_by_projection genescaffold:gadMor1:GeneScaffold_4461:169963:171283:-1 gene:ENSGMOG00000017062 transcript:ENSGMOT00000018768 gene_biotype:protein_coding transcript_biotype:protein_coding	136000	131799	99927.9	108235	116971	90078.9	124205	96608.4	113167	29613.9	94781.4	188734	121749	131106	127124	126258	64805.3	53386.7	66510.6	56364.7	144317	130864	70667.7	107344	120394	123500	141278	121339
ENSGMOP00000014600	2	2	199.099	0.676258	1.17404	2	Kontrol	pep:novel genescaffold:gadMor1:GeneScaffold_1663:1345:7500:-1 gene:ENSGMOG00000013654 transcript:ENSGMOT00000014975 gene_biotype:protein_coding transcript_biotype:protein_coding	85246.6	85457.7	52783	67294.3	104316	83949.4	80081.5	65243.3	42183.2	49538.4	61765.6	119620	118600	91800	109050	92935.8	54543.3	47800	60538	49837.2	135295	66266.5	63480.9	77977.6	48195.6	107797	131175	52328.9
ENSGMOP00000012387	3	2	299.772	0.199555	1.52001	0,5	2	pep:known_by_projection genescaffold:gadMor1:GeneScaffold_2117:50892:53713:1 gene:ENSGMOG00000011585 transcript:ENSGMOT00000012716 gene_biotype:protein_coding transcript_biotype:protein_coding	90791.5	58539.5	40287.3	54406.1	76706.3	44397.9	68123.4	45331.9	47153.2	16046.4	16766.6	63410	67337.6	73813.5	59005.4	45684.6	21778.8	20564	13462.8	21649.5	95458	97025.5	32077.7	88678.5	33957.3	61224.7	79479.9	70824.8
ENSGMOP00000007346	1	1	100	0.561042	1.16862	2	Kontrol	pep:known_by_projection genescaffold:gadMor1:GeneScaffold_1847:312221:314181:1 gene:ENSGMOG00000006915 transcript:ENSGMOT00000007555 gene_biotype:protein_coding transcript_biotype:protein_coding	95137.8	123985	89588.3	83391.4	99072.7	93478.1	76871.8	91661.3	58827.8	74738.7	141774	148435	74715.8	95386	143615	105669	76538.1	73674.1	72841.2	118238	108447	106061	141280	62566.3	89133.3	88769.7	64509.4	84649.6
ENSGMOP00000009435	3	2	396.425	0.112609	1.43836	Kontrol	2	pep:known_by_projection genescaffold:gadMor1:GeneScaffold_610:214359:219026:-1 gene:ENSGMOG00000008813 transcript:ENSGMOT00000009690 gene_biotype:protein_coding transcript_biotype:protein_coding	788724	924012	1.10921e+06	684667	637809	1.05658e+06	814432	693294	745407	2.08126e+06	870352	561092	653411	622531	547436	657383	649845	658624	745730	1.4345e+06	660755	915526	1.59523e+06	599836	615014	955742	517796	713044
ENSGMOP00000002326	16	16	2374.33	0.148185	1.27401	Kontrol	2	pep:known_by_projection genescaffold:gadMor1:GeneScaffold_1110:2244:38569:-1 gene:ENSGMOG00000002163 transcript:ENSGMOT00000002403 gene_biotype:protein_coding transcript_biotype:protein_coding	4.05881e+06	3.93458e+06	4.47142e+06	3.15043e+06	3.29669e+06	2.99622e+06	2.82963e+06	3.46816e+06	3.25592e+06	6.87012e+06	3.17638e+06	1.90266e+06	3.23269e+06	3.11425e+06	2.50202e+06	3.01323e+06	3.04304e+06	3.39592e+06	3.69875e+06	4.26959e+06	3.25116e+06	3.99886e+06	5.41692e+06	2.66205e+06	4.12978e+06	3.74855e+06	2.44709e+06	2.50688e+06
ENSGMOP00000000032	1	1	100	0.114213	1.32079	2	0,5	pep:known_by_projection genescaffold:gadMor1:GeneScaffold_3339:798:12107:1 gene:ENSGMOG00000000028 transcript:ENSGMOT00000000032 gene_biotype:protein_coding transcript_biotype:protein_coding	102788	86528.9	38076.6	57706.5	98709.2	102466	68073.6	85668	57048.1	68122	76610.7	73366.8	139719	98906.9	87890.5	95378	77985.4	136133	88272	38095.4	56680.3	37461.3	121682	90547.1	110308	57619.2	99554.2	49978.4
ENSGMOP00000018113	7	7	882.72	0.763307	1.0676	Kontrol	2	pep:known_by_projection genescaffold:gadMor1:GeneScaffold_1666:10864:21731:1 gene:ENSGMOG00000016861 transcript:ENSGMOT00000018560 gene_biotype:protein_coding transcript_biotype:protein_coding	757954	752122	699831	574464	657240	611637	675385	782639	578650	466305	592527	691619	615458	644698	593217	736419	636044	428888	588097	441447	951508	755538	697147	737426	450913	607855	634509	458724
ENSGMOP00000000110	8	8	971.377	0.765714	1.12618	Kontrol	2	pep:known_by_projection genescaffold:gadMor1:GeneScaffold_3267:478:7676:1 gene:ENSGMOG00000000107 transcript:ENSGMOT00000000113 gene_biotype:protein_coding transcript_biotype:protein_coding	1.07503e+06	1.04741e+06	1.45352e+06	1.07642e+06	770055	1.12273e+06	974684	882366	982711	2.42045e+06	1.33238e+06	783448	1.0681e+06	1.03229e+06	924172	924716	1.00015e+06	1.0661e+06	1.30306e+06	1.21909e+06	885903	1.29399e+06	1.40947e+06	724638	1.09119e+06	1.26054e+06	907699	901938
ENSGMOP00000004790	1	1	99.9912	0.408347	1.12208	2	Kontrol	pep:known_by_projection genescaffold:gadMor1:GeneScaffold_405:68288:73998:1 gene:ENSGMOG00000004525 transcript:ENSGMOT00000004931 gene_biotype:protein_coding transcript_biotype:protein_coding	67106.9	54790.4	51343.3	63713.6	83981	62931.9	80415.6	67882.8	63439	55034.8	74157	89254.1	55723.7	64801.9	69174.3	59289	79471.3	95046.3	70144.3	96548.4	58685.4	58687.8	67793.3	52844.9	59725.5	90236.5	61071	71306.3
ENSGMOP00000015288	5	5	700	0.0583369	1.22761	Kontrol	2	pep:known_by_projection genescaffold:gadMor1:GeneScaffold_3620:64124:65798:-1 gene:ENSGMOG00000014313 transcript:ENSGMOT00000015680 gene_biotype:protein_coding transcript_biotype:protein_coding	1.89555e+06	2.09027e+06	2.81869e+06	2.0571e+06	1.92382e+06	2.51501e+06	1.66176e+06	2.02835e+06	1.5816e+06	1.90509e+06	1.7791e+06	1.57818e+06	1.60121e+06	1.56972e+06	1.6539e+06	2.24406e+06	1.71276e+06	1.29059e+06	1.58298e+06	2.23191e+06	1.85515e+06	2.69794e+06	2.43687e+06	1.87742e+06	2.05598e+06	1.70374e+06	1.5078e+06	1.39705e+06
ENSGMOP00000002632	1	1	100	0.847204	1.11371	0,5	Kontrol	pep:known_by_projection genescaffold:gadMor1:GeneScaffold_2296:1381838:1453744:1 gene:ENSGMOG00000002435 transcript:ENSGMOT00000002717 gene_biotype:protein_coding transcript_biotype:protein_coding	73477.6	47390.5	107972	109670	89804.3	124114	121995	109612	39778.5	122914	70950.6	139018	100605	78913.7	131029	125560	171024	57161.9	59211.5	82556.3	115270	125275	73616.7	130607	36073.3	140933	100081	144530
ENSGMOP00000016429	1	1	99.9947	0.0987227	1.38992	2	Kontrol	pep:known_by_projection genescaffold:gadMor1:GeneScaffold_1963:433673:439653:-1 gene:ENSGMOG00000015338 transcript:ENSGMOT00000016845 gene_biotype:protein_coding transcript_biotype:protein_coding	17118.8	15617	5686.34	14214.5	14620.1	15057.1	11612.7	21520.3	15669.8	6317.81	16384.4	12256.3	18114	24915.4	21786.7	20988.1	20921.6	20492.5	16062	9867.66	14001.8	13232.3	11713.3	22837.5	18668.5	5837.55	25345.1	15625.9
ENSGMOP00000013379	4	4	597.793	0.0239448	1.21514	Kontrol	2	pep:known_by_projection genescaffold:gadMor1:GeneScaffold_4112:268495:271765:1 gene:ENSGMOG00000012499 transcript:ENSGMOT00000013734 gene_biotype:protein_coding transcript_biotype:protein_coding	2.65875e+06	2.39502e+06	3.77509e+06	3.15865e+06	2.85608e+06	2.47495e+06	2.78968e+06	3.30569e+06	3.09717e+06	2.03375e+06	2.4652e+06	2.85499e+06	2.26579e+06	2.24213e+06	2.2116e+06	2.02238e+06	2.45554e+06	2.19668e+06	2.42753e+06	3.0763e+06	3.08589e+06	2.9745e+06	2.04405e+06	3.10782e+06	2.74181e+06	2.56783e+06	2.54711e+06	2.51871e+06
ENSGMOP00000011991	10	10	1598.65	0.676558	1.11289	Kontrol	2	pep:known_by_projection genescaffold:gadMor1:GeneScaffold_1335:20645:24012:-1 gene:ENSGMOG00000011219 transcript:ENSGMOT00000012315 gene_biotype:protein_coding transcript_biotype:protein_coding	6.88502e+06	7.02434e+06	1.45365e+07	9.07585e+06	7.88973e+06	9.77609e+06	9.15423e+06	8.33286e+06	7.15362e+06	1.47437e+07	7.60354e+06	1.28367e+07	1.12771e+07	6.01613e+06	8.14486e+06	7.05188e+06	9.87919e+06	7.6617e+06	6.00966e+06	8.35076e+06	8.98144e+06	9.89989e+06	5.65256e+06	1.16631e+07	8.26913e+06	1.00611e+07	8.28059e+06	7.4454e+06
ENSGMOP00000008333	2	2	300	0.472337	1.13265	0,5	2	pep:known_by_projection contig::contig87295:60:1263:-1 gene:ENSGMOG00000007798 transcript:ENSGMOT00000008568 gene_biotype:protein_coding transcript_biotype:protein_coding	112842	55929	92585.5	83584.5	66654.8	82369.3	95322.7	83687.7	125964	85271.2	114758	136752	56340.4	40314.1	67524.4	60974	86372.7	89022.2	98071	139051	76959.2	97483.6	90275.3	69296.7	111626	98493	75354.9	91093.2
ENSGMOP00000013850	1	1	100	0.0265953	1.46098	2	Kontrol	pep:known_by_projection genescaffold:gadMor1:GeneScaffold_4106:41961:53429:-1 gene:ENSGMOG00000012951 transcript:ENSGMOT00000014212 gene_biotype:protein_coding transcript_biotype:protein_coding	12540.2	14983.7	12378.4	10321.5	16090.7	13053.2	10842.8	16106.1	10641.2	8880.46	14961.9	16124.9	21976.7	21331.6	22895.6	26867	14740.9	13854.7	12708.7	7009.32	12809.1	8066.53	12589.8	18718.2	16120.3	12750.4	23217.1	15409.8
ENSGMOP00000007582	5	1	583.611	0.198862	1.17816	0,5	2	pep:known_by_projection genescaffold:gadMor1:GeneScaffold_359:65739:78736:1 gene:ENSGMOG00000007121 transcript:ENSGMOT00000007799 gene_biotype:protein_coding transcript_biotype:protein_coding	107200	90571	109322	84771.2	102025	73283.5	64875.4	101220	70167.2	53348	86435.4	101341	53131.3	60661.1	84275.3	93161.1	72996.5	57147.3	67645.9	93882.3	92984.3	103682	97610.2	94805.9	92696.7	72088.3	68904.4	80717.1
ENSGMOP00000005867	3	3	600	0.487657	1.06823	2	Kontrol	pep:known_by_projection genescaffold:gadMor1:GeneScaffold_1960:826447:828749:-1 gene:ENSGMOG00000005521 transcript:ENSGMOT00000006040 gene_biotype:protein_coding transcript_biotype:protein_coding	4.44653e+06	3.69542e+06	4.63812e+06	4.68128e+06	4.1853e+06	3.94835e+06	4.84622e+06	4.14535e+06	4.67092e+06	4.69838e+06	5.05047e+06	5.43521e+06	4.28793e+06	4.38303e+06	4.9259e+06	3.66692e+06	5.34e+06	4.74806e+06	4.42178e+06	5.20236e+06	4.79767e+06	4.77311e+06	3.78141e+06	4.20472e+06	3.86663e+06	4.27519e+06	4.47031e+06	5.39842e+06
ENSGMOP00000015060	10	10	1299.25	0.501113	1.09968	2	Kontrol	pep:known_by_projection genescaffold:gadMor1:GeneScaffold_3993:4924:19910:-1 gene:ENSGMOG00000014084 transcript:ENSGMOT00000015447 gene_biotype:protein_coding transcript_biotype:protein_coding	1.01617e+06	1.08196e+06	1.41113e+06	1.20672e+06	920610	1.03499e+06	1.23602e+06	1.0758e+06	767587	934406	1.14562e+06	951923	1.44925e+06	986602	1.10546e+06	1.27829e+06	1.31686e+06	1.15468e+06	1.18677e+06	1.23299e+06	1.51071e+06	1.09863e+06	1.28318e+06	1.29289e+06	902755	683437	1.07155e+06	1.06263e+06
ENSGMOP00000016694	3	3	399.785	0.0487384	1.24036	2	Kontrol	pep:known_by_projection genescaffold:gadMor1:GeneScaffold_4661:47423:50647:-1 gene:ENSGMOG00000015429 transcript:ENSGMOT00000017113 gene_biotype:protein_coding transcript_biotype:protein_coding	316316	361029	514070	387629	346891	369150	482451	329465	363493	337686	417525	443145	518424	442989	485649	585334	568445	378392	411263	312830	446737	481291	371277	404384	245394	447764	363761	560133
ENSGMOP00000010396	4	3	598.384	0.834171	1.04509	Kontrol	0,5	pep:known_by_projection genescaffold:gadMor1:GeneScaffold_1633:60639:62370:-1 gene:ENSGMOG00000009708 transcript:ENSGMOT00000010678 gene_biotype:protein_coding transcript_biotype:protein_coding	2.27103e+06	3.00856e+06	1.63702e+06	2.70633e+06	2.56313e+06	2.03897e+06	1.1882e+06	1.77224e+06	1.87714e+06	1.564e+06	2.61093e+06	2.18179e+06	1.79475e+06	2.0051e+06	1.68728e+06	2.50756e+06	1.6586e+06	1.83289e+06	1.94001e+06	1.97412e+06	2.02629e+06	2.79239e+06	3.02734e+06	1.62561e+06	2.54576e+06	1.08992e+06	1.12978e+06	1.55186e+06
ENSGMOP00000020092	2	1	300	0.584592	1.59508	2	Kontrol	pep:known_by_projection genescaffold:gadMor1:GeneScaffold_1941:41812:46351:-1 gene:ENSGMOG00000018700 transcript:ENSGMOT00000020590 gene_biotype:protein_coding transcript_biotype:protein_coding	31242.1	26977.8	21545.2	39851.6	28732.2	8540.42	9814.75	25556.3	12116.7	4615.73	71251.2	24021.8	19790.5	16839.3	76702.3	17559.5	54034.8	5115.75	14708.6	18917.4	14634.3	29182.7	33498	7094.68	22963	23308.4	15620.2	40543.7
ENSGMOP00000002034	3	3	300	0.56201	1.22159	0,5	2	pep:known_by_projection genescaffold:gadMor1:GeneScaffold_3978:459:17809:-1 gene:ENSGMOG00000001907 transcript:ENSGMOT00000002101 gene_biotype:protein_coding transcript_biotype:protein_coding	291811	242512	90773.5	209375	264211	143295	201214	212264	208970	73982.6	122713	292807	211059	225859	225251	187787	90024.4	99957.7	98245	88980.5	330233	263164	132582	258761	182546	234717	213332	193670
ENSGMOP00000017089	16	15	1970.6	0.20259	1.17206	2	Kontrol	pep:known_by_projection genescaffold:gadMor1:GeneScaffold_4475:43720:55563:1 gene:ENSGMOG00000015921 transcript:ENSGMOT00000017517 gene_biotype:protein_coding transcript_biotype:protein_coding	2.49616e+06	3.20246e+06	1.82528e+06	2.89546e+06	3.36285e+06	3.187e+06	3.87893e+06	2.91572e+06	2.92498e+06	2.40584e+06	3.00828e+06	5.32694e+06	3.08513e+06	2.63291e+06	3.41158e+06	3.17119e+06	3.60092e+06	3.30035e+06	3.15335e+06	2.63136e+06	2.82176e+06	2.6377e+06	3.32524e+06	3.39877e+06	2.40245e+06	3.85904e+06	3.52558e+06	2.61632e+06
ENSGMOP00000012915	6	5	799.82	0.764844	1.04764	Kontrol	2	pep:known_by_projection genescaffold:gadMor1:GeneScaffold_3122:670:10695:-1 gene:ENSGMOG00000012074 transcript:ENSGMOT00000013258 gene_biotype:protein_coding transcript_biotype:protein_coding	1.08783e+06	763603	1.00425e+06	813625	870465	967389	857342	1.05444e+06	829983	804155	580758	746225	845714	823524	975898	1.21636e+06	1.06729e+06	722224	799280	830791	1.26996e+06	1.04205e+06	858819	829773	848834	594547	896712	726432
ENSGMOP00000018390	1	1	100	0.28758	1.58335	0,5	2	pep:novel genescaffold:gadMor1:GeneScaffold_547:16873:29169:1 gene:ENSGMOG00000017113 transcript:ENSGMOT00000018841 gene_biotype:protein_coding transcript_biotype:protein_coding	43436.2	15101	16023.7	10415.5	11030.9	15879	8904.72	29160.1	9633.74	21194.6	12496.9	4861	14337.1	15341.9	14210	17597.4	8013.98	18421.9	12026.2	17121.1	15673.8	11595.8	21977.2	27203	22098.5	44188.6	20827.6	5051.46
ENSGMOP00000006197	1	1	100	0.679037	1.1844	0,5	2	pep:known_by_projection genescaffold:gadMor1:GeneScaffold_1406:178320:179467:1 gene:ENSGMOG00000005783 transcript:ENSGMOT00000006374 gene_biotype:protein_coding transcript_biotype:protein_coding	194857	156708	106687	172145	163289	124746	181832	132092	109235	43182	77055.4	189377	179688	182796	195810	144862	95884.4	59030.6	61156.5	66338.3	241378	252004	95053.8	170862	107629	128161	181186	161681
ENSGMOP00000017068	8	8	1094.99	0.852866	1.02623	2	0,5	pep:known_by_projection genescaffold:gadMor1:GeneScaffold_2545:13009:21881:-1 gene:ENSGMOG00000015918 transcript:ENSGMOT00000017496 gene_biotype:protein_coding transcript_biotype:protein_coding	1.38939e+06	1.66084e+06	1.23404e+06	1.54179e+06	1.40324e+06	1.50144e+06	1.29209e+06	1.41523e+06	1.38572e+06	1.6016e+06	1.39873e+06	1.24089e+06	1.32512e+06	1.3774e+06	1.37895e+06	2.00211e+06	1.36153e+06	1.57731e+06	1.37119e+06	1.43523e+06	1.30621e+06	1.50545e+06	1.7825e+06	1.45378e+06	1.79706e+06	1.1546e+06	1.04532e+06	1.21999e+06
ENSGMOP00000019889	2	2	299.085	0.721955	1.06369	Kontrol	2	pep:known_by_projection genescaffold:gadMor1:GeneScaffold_905:123:8316:1 gene:ENSGMOG00000018485 transcript:ENSGMOT00000020374 gene_biotype:protein_coding transcript_biotype:protein_coding	155445	149246	204638	247604	156851	175765	223719	219763	190783	190675	165187	211845	168043	182022	176881	154067	204190	163256	194385	220889	145538	207904	144675	176364	189089	204979	192701	176855
ENSGMOP00000001026	1	1	100	0.878859	1.08322	0,5	Kontrol	pep:known_by_projection genescaffold:gadMor1:GeneScaffold_4035:679503:690634:1 gene:ENSGMOG00000000990 transcript:ENSGMOT00000001063 gene_biotype:protein_coding transcript_biotype:protein_coding	5686.83	6214.99	5313.43	4753.59	4833.26	6030.8	4325.6	5255.52	5268.26	4827.96	6297.47	5312.78	5537.75	4381.92	5076.35	5479.7	5353.69	6028.29	4866.84	7989.83	3647.98	8767.36	5367.4	4548.65	4270.01	6768.05	4448.8	5384.29
ENSGMOP00000012083	14	12	1872.87	0.462751	1.10677	0,5	2	pep:known_by_projection genescaffold:gadMor1:GeneScaffold_904:3219:7579:-1 gene:ENSGMOG00000011297 transcript:ENSGMOT00000012409 gene_biotype:protein_coding transcript_biotype:protein_coding	3.12773e+06	2.73809e+06	2.22326e+06	3.00436e+06	2.82731e+06	2.37811e+06	3.22109e+06	2.60153e+06	2.38513e+06	1.5276e+06	1.84839e+06	3.58524e+06	2.45337e+06	2.49464e+06	3.27472e+06	2.71081e+06	2.04942e+06	1.8947e+06	1.66716e+06	2.16196e+06	2.86202e+06	3.17335e+06	2.14994e+06	2.77035e+06	2.66093e+06	2.79324e+06	2.93469e+06	2.81851e+06
ENSGMOP00000011269	4	3	587.842	0.742028	1.10043	0,5	2	pep:known_by_projection genescaffold:gadMor1:GeneScaffold_214:7681:21075:-1 gene:ENSGMOG00000010520 transcript:ENSGMOT00000011573 gene_biotype:protein_coding transcript_biotype:protein_coding	440509	460753	472567	543514	519958	823128	831125	620544	716569	610073	442403	519036	698210	444689	541193	728062	657103	648183	549383	550882	739399	627755	388175	723485	439751	841644	721772	720471
ENSGMOP00000005362	10	10	1284.45	0.711758	1.0609	0,5	2	pep:known_by_projection genescaffold:gadMor1:GeneScaffold_1960:722548:724142:1 gene:ENSGMOG00000005074 transcript:ENSGMOT00000005524 gene_biotype:protein_coding transcript_biotype:protein_coding	3.00042e+06	2.59224e+06	3.01227e+06	2.78983e+06	2.96163e+06	2.29504e+06	3.50776e+06	3.0926e+06	2.69761e+06	1.64096e+06	2.68537e+06	3.99908e+06	2.32684e+06	2.24841e+06	3.13596e+06	2.48156e+06	3.00368e+06	2.12015e+06	2.17789e+06	3.21012e+06	3.23472e+06	3.23671e+06	2.2013e+06	2.83721e+06	2.54491e+06	2.79153e+06	2.88036e+06	2.71457e+06
ENSGMOP00000005618	1	1	100	0.024703	1.44724	Kontrol	2	pep:known_by_projection genescaffold:gadMor1:GeneScaffold_1372:142766:148087:-1 gene:ENSGMOG00000005294 transcript:ENSGMOT00000005784 gene_biotype:protein_coding transcript_biotype:protein_coding	119544	86320.8	119802	151982	104850	88919.5	54694.5	163064	108806	90767.1	55172.9	67548.5	71739.5	72791.1	75624.9	92733.5	85775.3	84318.8	71361.8	68215.3	111225	118919	108061	141162	116417	98048.5	97229.1	55571.5
ENSGMOP00000006462	7	1	891.707	0.872812	1.05528	Kontrol	0,5	pep:known_by_projection genescaffold:gadMor1:GeneScaffold_3590:2289240:2292628:1 gene:ENSGMOG00000006089 transcript:ENSGMOT00000006652 gene_biotype:protein_coding transcript_biotype:protein_coding	95213.4	79782.7	61948.4	134944	78070.5	89147.2	105745	120731	110839	100544	92509	97212.6	94761	96377.7	78586.2	91091.2	89724.7	111840	102310	68885.2	103621	93884.3	76847.3	97719.1	94937.3	105939	91947.7	99431.2
ENSGMOP00000008250;ENSGMOP00000012087	3	2	298.815	0.466506	1.09948	0,5	2	pep:known_by_projection genescaffold:gadMor1:GeneScaffold_168:370988:373355:1 gene:ENSGMOG00000007712 transcript:ENSGMOT00000008484 gene_biotype:protein_coding transcript_biotype:protein_coding	1.8016e+06	1.49665e+06	1.8288e+06	2.03183e+06	1.81019e+06	1.63405e+06	2.50232e+06	2.33031e+06	1.70115e+06	1.9564e+06	1.75737e+06	1.45246e+06	1.76239e+06	1.71772e+06	1.61754e+06	1.59482e+06	2.70226e+06	1.97939e+06	1.679e+06	2.12838e+06	1.95858e+06	2.22813e+06	1.52759e+06	1.69407e+06	1.90725e+06	2.42484e+06	1.63617e+06	2.37579e+06
ENSGMOP00000013962	2	2	200	0.0680558	1.60867	Kontrol	2	pep:known_by_projection genescaffold:gadMor1:GeneScaffold_3005:617:50666:1 gene:ENSGMOG00000013046 transcript:ENSGMOT00000014325 gene_biotype:protein_coding transcript_biotype:protein_coding	498161	221751	300350	105774	235091	228664	216364	173488	160239	430743	162723	89457	173225	192040	115977	185329	111461	270582	137387	254822	164797	207100	440826	187976	159507	336799	131045	179222
ENSGMOP00000020787	1	1	100	0.00338044	2.00717	0,5	2	pep:known genescaffold:gadMor1:GeneScaffold_1215:174004:182703:1 gene:ENSGMOG00000019329 transcript:ENSGMOT00000021294 gene_biotype:protein_coding transcript_biotype:protein_coding	370203	208580	175144	211287	206897	152371	268113	333479	296925	406224	172962	130241	89318.9	157053	105034	102830	146372	171946	128795	222026	260667	190020	760719	175341	269854	292786	147421	98909.6
ENSGMOP00000004199	1	1	100	0.0532039	1.42493	Kontrol	2	pep:known_by_projection genescaffold:gadMor1:GeneScaffold_2817:88262:96868:1 gene:ENSGMOG00000003966 transcript:ENSGMOT00000004328 gene_biotype:protein_coding transcript_biotype:protein_coding	233076	205517	282340	158770	163565	301121	161302	144427	182565	376874	192706	154977	156349	183617	152353	138057	165478	124809	127233	266030	157342	366590	194914	144213	218074	217090	134815	164029
ENSGMOP00000007884	1	1	100	0.556316	1.26648	2	0,5	pep:known_by_projection genescaffold:gadMor1:GeneScaffold_4231:9838:13332:-1 gene:ENSGMOG00000007382 transcript:ENSGMOT00000008113 gene_biotype:protein_coding transcript_biotype:protein_coding	3334.26	5685.25	9.37313	3604.06	4290.42	3158.22	2713.93	6192.88	1942.96	2750.56	7317.97	2966.28	2145.7	6148.78	4155.03	3548.82	3088.4	4281.03	1896.06	808.748	1503.09	2554.82	7426.28	3169.63	4396.55	4136.92	2546.29	1525.97
ENSGMOP00000008404	3	1	399.509	0.00570292	2.14523	2	Kontrol	pep:known_by_projection genescaffold:gadMor1:GeneScaffold_260:246019:254165:-1 gene:ENSGMOG00000007859 transcript:ENSGMOT00000008642 gene_biotype:protein_coding transcript_biotype:protein_coding	78272.8	65600.2	40828.7	47676	65790.9	57687.8	31679.8	57070.9	41313.8	42369.4	57271.7	46326.4	138878	180665	92366.6	131251	62876.6	174199	136139	25196.7	51092	38005.4	64668.5	75194.5	61405.2	77557.3	154524	34115.4
ENSGMOP00000017977	9	8	1197.45	0.0463596	1.18766	0,5	2	pep:known_by_projection genescaffold:gadMor1:GeneScaffold_81:21252:30807:-1 gene:ENSGMOG00000016739 transcript:ENSGMOT00000018419 gene_biotype:protein_coding transcript_biotype:protein_coding	3.80353e+06	3.33861e+06	3.72813e+06	3.24094e+06	2.97232e+06	3.02651e+06	3.00582e+06	2.81842e+06	3.0464e+06	3.22698e+06	3.01689e+06	3.19554e+06	2.6316e+06	2.8768e+06	3.23941e+06	3.02084e+06	2.66258e+06	2.36729e+06	2.47281e+06	3.22962e+06	3.58265e+06	4.13706e+06	4.03572e+06	2.63372e+06	3.68699e+06	2.85515e+06	2.41821e+06	3.68703e+06
ENSGMOP00000017097	14	14	1993.66	0.715331	1.11487	Kontrol	2	pep:known_by_projection genescaffold:gadMor1:GeneScaffold_1780:359450:386765:1 gene:ENSGMOG00000015944 transcript:ENSGMOT00000017525 gene_biotype:protein_coding transcript_biotype:protein_coding	8.15885e+06	6.92556e+06	1.05484e+07	1.15716e+07	1.27045e+07	6.65929e+06	9.78771e+06	1.35214e+07	1.25557e+07	7.53796e+06	9.62082e+06	8.42789e+06	8.46453e+06	9.08432e+06	8.75036e+06	5.70701e+06	1.07194e+07	1.04974e+07	9.43182e+06	8.93038e+06	1.1947e+07	9.41631e+06	6.21071e+06	1.01469e+07	1.19384e+07	9.58557e+06	5.57953e+06	1.12269e+07
ENSGMOP00000017023	3	3	372.331	0.881821	1.0494	2	0,5	pep:known_by_projection genescaffold:gadMor1:GeneScaffold_1963:689611:695162:1 gene:ENSGMOG00000015841 transcript:ENSGMOT00000017449 gene_biotype:protein_coding transcript_biotype:protein_coding	273686	267054	240711	242084	200236	219586	202941	241436	250297	313562	384356	117686	259726	290854	224278	209563	236821	249150	257495	223739	301909	266998	233356	162986	208214	344503	189672	193586
ENSGMOP00000004352	14	10	1598.05	0.799438	1.07247	0,5	2	pep:known_by_projection genescaffold:gadMor1:GeneScaffold_2686:20849:35173:1 gene:ENSGMOG00000004080 transcript:ENSGMOT00000004485 gene_biotype:protein_coding transcript_biotype:protein_coding	1.9576e+06	1.35701e+06	2.08479e+06	1.46433e+06	1.34244e+06	1.1922e+06	1.71852e+06	1.56981e+06	1.16452e+06	1.16281e+06	1.52463e+06	1.32439e+06	1.55384e+06	1.37564e+06	1.51545e+06	1.87777e+06	1.55332e+06	1.23947e+06	1.20332e+06	1.47233e+06	2.42557e+06	1.69531e+06	1.56989e+06	1.65665e+06	1.23111e+06	1.22267e+06	1.30993e+06	1.53869e+06
ENSGMOP00000021842	4	4	500	0.271692	1.11132	2	Kontrol	pep:known_by_projection genescaffold:gadMor1:GeneScaffold_3411:5088:5663:1 gene:ENSGMOG00000020353 transcript:ENSGMOT00000022360 gene_biotype:protein_coding transcript_biotype:protein_coding	1.67524e+06	2.16768e+06	1.68201e+06	1.92798e+06	1.84763e+06	1.58907e+06	1.95837e+06	2.22675e+06	1.90454e+06	1.41943e+06	1.98582e+06	2.44957e+06	2.08552e+06	2.0039e+06	2.28628e+06	2.12141e+06	2.0207e+06	1.60526e+06	1.84369e+06	1.66127e+06	1.99105e+06	1.55598e+06	1.61625e+06	1.77958e+06	1.67989e+06	2.20671e+06	2.16507e+06	2.53043e+06
ENSGMOP00000001490	1	1	100	0.325855	1.27096	2	0,5	pep:known_by_projection genescaffold:gadMor1:GeneScaffold_1671:1035046:1041809:1 gene:ENSGMOG00000001430 transcript:ENSGMOT00000001544 gene_biotype:protein_coding transcript_biotype:protein_coding	14204.4	15265.1	5547.88	8803.24	10156.3	10205	6604.86	14182.7	10138.4	11635	10357.7	7996.42	11568.7	17646	13366.9	23170.8	9297.06	11012.6	9652.73	5746.53	7010.64	7395.37	12684.2	13665.5	14217.8	9777.25	12848.3	6404.66
ENSGMOP00000009097	9	8	1399.62	0.44118	1.04866	2	Kontrol	pep:known_by_projection genescaffold:gadMor1:GeneScaffold_1762:133064:144720:-1 gene:ENSGMOG00000008498 transcript:ENSGMOT00000009344 gene_biotype:protein_coding transcript_biotype:protein_coding	1.73833e+06	1.63537e+06	1.345e+06	1.88225e+06	1.79856e+06	1.80297e+06	1.67728e+06	1.81432e+06	1.6989e+06	1.5771e+06	1.64928e+06	1.72262e+06	1.84097e+06	1.69129e+06	1.84486e+06	2.04157e+06	1.89449e+06	1.71968e+06	1.61153e+06	1.61837e+06	1.63432e+06	1.79785e+06	1.76548e+06	1.93417e+06	1.7871e+06	1.53587e+06	1.80205e+06	1.65881e+06
ENSGMOP00000005662	12	11	1793.22	0.219825	1.10241	0,5	2	pep:known_by_projection genescaffold:gadMor1:GeneScaffold_2286:106728:114214:1 gene:ENSGMOG00000005340 transcript:ENSGMOT00000005829 gene_biotype:protein_coding transcript_biotype:protein_coding	4.98959e+06	5.13903e+06	7.05717e+06	6.74785e+06	5.46821e+06	6.75004e+06	6.99564e+06	7.17212e+06	6.54716e+06	7.31321e+06	5.50076e+06	6.37453e+06	5.6627e+06	5.55537e+06	5.94047e+06	6.88477e+06	6.32824e+06	6.45933e+06	4.88572e+06	7.70436e+06	6.54522e+06	6.63891e+06	5.50728e+06	6.69062e+06	6.58732e+06	7.29081e+06	6.08661e+06	6.02935e+06
ENSGMOP00000005539	2	2	193.186	0.730289	1.18713	0,5	2	pep:known_by_projection genescaffold:gadMor1:GeneScaffold_1722:375582:472743:-1 gene:ENSGMOG00000005081 transcript:ENSGMOT00000005705 gene_biotype:protein_coding transcript_biotype:protein_coding	102166	52545	6030.48	25058.2	24801.7	43782.9	31912.2	19433.9	30658.1	132532	65648.6	34524.7	43100.5	44580.8	42865.6	41326.8	26176	43242.4	74625	170521	36716.5	26489.1	54496.1	22049	15708.5	108160	38809.7	21003
ENSGMOP00000006766	1	1	200	0.872947	1.02649	0,5	Kontrol	pep:known_by_projection genescaffold:gadMor1:GeneScaffold_4463:7983:10251:-1 gene:ENSGMOG00000006373 transcript:ENSGMOT00000006961 gene_biotype:protein_coding transcript_biotype:protein_coding	321013	308501	236649	253295	272612	273093	203634	293202	248476	198809	236064	294299	287318	237598	309880	327687	258681	237563	214214	221754	301830	234230	275172	287985	255379	295116	292358	246738
ENSGMOP00000019681	3	3	300	0.842884	1.03755	2	Kontrol	pep:known_by_projection genescaffold:gadMor1:GeneScaffold_1484:322850:325019:-1 gene:ENSGMOG00000018294 transcript:ENSGMOT00000020160 gene_biotype:protein_coding transcript_biotype:protein_coding	401336	407026	482696	375659	475589	318455	410654	452739	385983	245748	472733	537295	379651	382775	422224	451726	412239	293013	342330	384550	424101	368354	519695	406277	398651	389572	388536	374946
ENSGMOP00000013079;ENSGMOP00000013083	2	2	200	0.767844	1.06773	Kontrol	2	pep:known_by_projection genescaffold:gadMor1:GeneScaffold_3610:234846:236334:-1 gene:ENSGMOG00000012216 transcript:ENSGMOT00000013426 gene_biotype:protein_coding transcript_biotype:protein_coding	553343	802962	697596	612209	714209	542355	618176	673407	550764	930902	592204	637466	798791	850164	501238	345480	665124	627748	625834	538214	446679	587696	747953	524117	654463	985851	446303	905206
ENSGMOP00000000457	3	2	299.785	0.665569	1.0669	2	Kontrol	pep:known_by_projection genescaffold:gadMor1:GeneScaffold_2861:55100:75428:-1 gene:ENSGMOG00000000436 transcript:ENSGMOT00000000483 gene_biotype:protein_coding transcript_biotype:protein_coding	700251	854219	421246	972739	893490	1.10045e+06	1.06501e+06	778735	926737	1.10251e+06	1.1502e+06	878780	867559	877307	993382	874975	931016	1.00726e+06	884124	811939	770013	1.51544e+06	880491	865834	1.0012e+06	661823	963464	816309
ENSGMOP00000011175	7	7	1287.42	0.362796	1.15649	Kontrol	2	pep:known_by_projection genescaffold:gadMor1:GeneScaffold_1083:185232:187591:1 gene:ENSGMOG00000010446 transcript:ENSGMOT00000011476 gene_biotype:protein_coding transcript_biotype:protein_coding	4.32294e+06	3.79332e+06	5.45326e+06	5.85037e+06	3.62436e+06	3.66072e+06	6.01709e+06	5.70099e+06	6.93443e+06	5.50652e+06	5.38224e+06	4.4555e+06	2.94131e+06	3.4062e+06	3.27141e+06	4.00305e+06	6.24704e+06	4.84619e+06	5.03015e+06	5.96785e+06	3.88536e+06	4.765e+06	3.5767e+06	4.72092e+06	5.53058e+06	4.66678e+06	4.07841e+06	5.91588e+06
ENSGMOP00000008274	12	10	1499.94	0.874835	1.06132	0,5	2	pep:known_by_projection genescaffold:gadMor1:GeneScaffold_4223:65727:68866:-1 gene:ENSGMOG00000007738 transcript:ENSGMOT00000008509 gene_biotype:protein_coding transcript_biotype:protein_coding	1.59027e+06	1.93503e+06	2.8873e+06	3.74247e+06	2.23303e+06	2.7074e+06	2.49335e+06	2.85303e+06	3.04328e+06	1.81635e+06	2.8215e+06	2.37362e+06	2.44719e+06	2.5049e+06	2.41787e+06	1.95958e+06	2.61363e+06	2.89961e+06	2.3341e+06	3.07198e+06	2.4007e+06	2.61732e+06	1.60295e+06	2.47222e+06	3.55424e+06	2.08692e+06	3.07088e+06	2.86667e+06
ENSGMOP00000013472;ENSGMOP00000021830	4	4	398.435	0.49787	1.0863	Kontrol	2	pep:known_by_projection genescaffold:gadMor1:GeneScaffold_1579:641424:642136:1 gene:ENSGMOG00000012595 transcript:ENSGMOT00000013828 gene_biotype:protein_coding transcript_biotype:protein_coding	1.33712e+06	1.18962e+06	1.05345e+06	1.10945e+06	1.40828e+06	938451	1.29872e+06	1.28051e+06	1.18608e+06	1.00014e+06	1.04525e+06	1.46672e+06	1.05689e+06	1.05493e+06	1.12375e+06	1.05177e+06	1.11939e+06	959993	899176	1.04719e+06	1.39168e+06	1.05853e+06	849624	1.31857e+06	1.24748e+06	1.26008e+06	1.30338e+06	862143
ENSGMOP00000002168	5	5	599.94	0.424365	1.09377	0,5	2	pep:known_by_projection genescaffold:gadMor1:GeneScaffold_2567:107396:115467:1 gene:ENSGMOG00000002021 transcript:ENSGMOT00000002237 gene_biotype:protein_coding transcript_biotype:protein_coding	942613	757627	1.05482e+06	786397	932785	849072	982915	959619	723608	607393	712893	1.01983e+06	714785	708072	938357	962200	899356	568598	755323	931469	1.07838e+06	852971	724590	809205	883187	905660	828965	947541
ENSGMOP00000010168	2	2	199.623	0.523915	1.06532	2	0,5	pep:known_by_projection genescaffold:gadMor1:GeneScaffold_644:28253:37980:-1 gene:ENSGMOG00000009518 transcript:ENSGMOT00000010445 gene_biotype:protein_coding transcript_biotype:protein_coding	423594	450157	457004	653808	473490	439709	498713	554935	579491	536407	562317	511664	490530	553408	501806	491170	607596	507958	509296	607677	476701	551216	445229	474021	527060	334892	444729	583837
ENSGMOP00000013692	3	3	394.178	0.246257	1.32133	2	0,5	pep:known_by_projection genescaffold:gadMor1:GeneScaffold_1532:183307:193937:-1 gene:ENSGMOG00000012792 transcript:ENSGMOT00000014053 gene_biotype:protein_coding transcript_biotype:protein_coding	1.81061e+06	2.01651e+06	1.54524e+06	1.50379e+06	1.04081e+06	2.92028e+06	1.67739e+06	1.9003e+06	1.85531e+06	2.76184e+06	3.16545e+06	3.45181e+06	1.96915e+06	2.22393e+06	3.47809e+06	2.45356e+06	1.43567e+06	1.61371e+06	1.26223e+06	1.82398e+06	2.16216e+06	1.7005e+06	2.93727e+06	1.43079e+06	1.74338e+06	1.35586e+06	1.72414e+06	1.0556e+06
ENSGMOP00000017132	3	3	400	0.0717291	1.257	Kontrol	2	pep:known_by_projection genescaffold:gadMor1:GeneScaffold_363:890:22012:-1 gene:ENSGMOG00000015959 transcript:ENSGMOT00000017560 gene_biotype:protein_coding transcript_biotype:protein_coding	307343	358915	359658	270793	303355	358153	310211	261721	269336	558993	297776	187500	219047	226503	231802	249699	321060	308340	362903	285012	288964	371415	461881	256535	321583	339996	257568	281177
ENSGMOP00000007197	5	5	699.509	0.660833	1.17447	2	0,5	pep:known_by_projection genescaffold:gadMor1:GeneScaffold_4258:372:25664:-1 gene:ENSGMOG00000006765 transcript:ENSGMOT00000007401 gene_biotype:protein_coding transcript_biotype:protein_coding	1.47651e+06	550771	848970	994920	1.35497e+06	693406	1.01341e+06	641648	696408	258803	548335	673760	1.11326e+06	844956	1.43171e+06	1.2608e+06	684590	708235	715952	472438	1.29221e+06	969552	480065	1.002e+06	488102	646504	925721	519300
ENSGMOP00000008975	6	6	974.948	0.703282	1.08198	0,5	2	pep:known_by_projection genescaffold:gadMor1:GeneScaffold_1125:162392:166960:-1 gene:ENSGMOG00000008385 transcript:ENSGMOT00000009221 gene_biotype:protein_coding transcript_biotype:protein_coding	854365	835010	601223	1.00524e+06	859267	671593	1.0946e+06	659107	630706	339557	403821	1.16411e+06	856509	718465	1.14791e+06	810247	527729	397510	556718	711793	814312	915177	537827	861323	701538	615317	1.07746e+06	887971
ENSGMOP00000001071	3	3	398.169	0.644395	1.08237	0,5	2	pep:known_by_projection genescaffold:gadMor1:GeneScaffold_3825:65372:70492:-1 gene:ENSGMOG00000001036 transcript:ENSGMOT00000001109 gene_biotype:protein_coding transcript_biotype:protein_coding	264176	348431	327991	378105	269734	463292	447922	458899	379735	245819	296110	349506	325018	416305	272564	295861	390017	385009	318701	335060	301124	377353	299590	424350	388344	351788	433550	389090
ENSGMOP00000013395	7	7	899.94	0.869321	1.04425	Kontrol	0,5	pep:known_by_projection genescaffold:gadMor1:GeneScaffold_3239:369:3156:1 gene:ENSGMOG00000012515 transcript:ENSGMOT00000013750 gene_biotype:protein_coding transcript_biotype:protein_coding	2.98359e+06	3.19435e+06	2.43045e+06	3.29014e+06	3.65799e+06	2.79815e+06	3.67343e+06	3.68653e+06	3.16425e+06	4.75901e+06	3.26216e+06	4.1522e+06	2.96638e+06	3.02633e+06	3.56828e+06	3.23762e+06	3.50691e+06	2.79352e+06	2.71177e+06	3.50137e+06	3.49607e+06	2.98794e+06	3.03179e+06	3.42512e+06	3.03303e+06	3.42094e+06	3.18571e+06	2.90913e+06
ENSGMOP00000012330	8	6	999.617	0.221788	1.10198	2	Kontrol	pep:known_by_projection genescaffold:gadMor1:GeneScaffold_797:178:26564:1 gene:ENSGMOG00000011530 transcript:ENSGMOT00000012658 gene_biotype:protein_coding transcript_biotype:protein_coding	2.21168e+06	2.06446e+06	2.1644e+06	2.2307e+06	1.98423e+06	1.98928e+06	1.9216e+06	2.54746e+06	2.10841e+06	2.20621e+06	2.4407e+06	1.8402e+06	2.404e+06	2.48939e+06	2.67366e+06	2.60903e+06	2.43127e+06	2.26003e+06	2.10394e+06	2.06295e+06	2.12092e+06	2.12583e+06	2.02693e+06	1.68436e+06	2.43446e+06	2.93113e+06	2.20723e+06	2.33429e+06
ENSGMOP00000007030	3	3	300	0.759672	1.05425	Kontrol	2	pep:known_by_projection genescaffold:gadMor1:GeneScaffold_669:102650:107057:1 gene:ENSGMOG00000006613 transcript:ENSGMOT00000007232 gene_biotype:protein_coding transcript_biotype:protein_coding	331000	296064	438445	379041	366701	305334	316924	378477	409150	336645	354428	319759	302434	364105	302880	301551	337790	418405	335888	514689	309009	354730	256569	305968	389825	377974	297208	328141
ENSGMOP00000021031	4	3	496.843	0.773922	1.06229	2	Kontrol	pep:known_by_projection genescaffold:gadMor1:GeneScaffold_427:3742:6078:-1 gene:ENSGMOG00000019554 transcript:ENSGMOT00000021545 gene_biotype:protein_coding transcript_biotype:protein_coding	185441	167399	275420	230486	193971	128643	268353	240711	212994	240368	259590	200478	180904	217318	200816	208284	254116	317971	210105	258369	171958	224507	151975	226015	308494	278037	181928	220764
ENSGMOP00000000018	7	6	798.492	0.452537	1.05271	Kontrol	2	pep:known_by_projection genescaffold:gadMor1:GeneScaffold_4306:15381:22224:1 gene:ENSGMOG00000000014 transcript:ENSGMOT00000000018 gene_biotype:protein_coding transcript_biotype:protein_coding	1.17104e+06	1.07263e+06	1.18646e+06	1.22544e+06	1.10064e+06	1.01878e+06	1.01071e+06	1.01771e+06	1.07437e+06	999482	1.11942e+06	1.18963e+06	952240	972122	977190	1.06804e+06	1.06413e+06	1.01722e+06	939403	1.31274e+06	1.05404e+06	1.1746e+06	1.03682e+06	950424	1.10625e+06	993217	915794	1.08992e+06
ENSGMOP00000017650	6	6	897.54	0.62564	1.08775	Kontrol	2	pep:known_by_projection genescaffold:gadMor1:GeneScaffold_2077:24384:25577:-1 gene:ENSGMOG00000016457 transcript:ENSGMOT00000018085 gene_biotype:protein_coding transcript_biotype:protein_coding	825595	684280	706644	789258	859771	613495	893475	1.09765e+06	966808	680147	733542	809644	708668	717007	702410	688765	784145	758303	813619	1.09067e+06	912669	735048	610921	876617	739274	814204	708723	590484
ENSGMOP00000008657	5	5	500	0.801782	1.08489	Kontrol	2	pep:known_by_projection genescaffold:gadMor1:GeneScaffold_168:1487154:1497567:-1 gene:ENSGMOG00000008088 transcript:ENSGMOT00000008900 gene_biotype:protein_coding transcript_biotype:protein_coding	782930	653508	1.15614e+06	698507	788011	570460	582804	758572	584942	439293	697468	608216	537348	613600	707858	827756	592934	652558	581890	742718	784228	772998	591259	682211	736554	565877	564931	497349
ENSGMOP00000009803	6	5	596.799	0.0224559	1.55952	2	Kontrol	pep:known_by_projection genescaffold:gadMor1:GeneScaffold_1493:5233:17224:1 gene:ENSGMOG00000009164 transcript:ENSGMOT00000010065 gene_biotype:protein_coding transcript_biotype:protein_coding	1.62822e+06	1.2183e+06	652315	1.45661e+06	1.40742e+06	1.46754e+06	1.42101e+06	1.01039e+06	1.29674e+06	1.22289e+06	1.59777e+06	2.44153e+06	1.50132e+06	1.3613e+06	2.64651e+06	1.92375e+06	2.01236e+06	1.26138e+06	3.19374e+06	2.8377e+06	1.28023e+06	1.26577e+06	640658	1.19925e+06	996103	1.61124e+06	1.54895e+06	1.53205e+06
ENSGMOP00000006057	18	18	3394.98	0.0507906	1.72418	0,5	2	pep:known_by_projection genescaffold:gadMor1:GeneScaffold_2783:752:1284:1 gene:ENSGMOG00000005709 transcript:ENSGMOT00000006232 gene_biotype:protein_coding transcript_biotype:protein_coding	7.02605e+07	4.70803e+07	8.8786e+07	4.1554e+07	3.03649e+07	6.47523e+07	6.01234e+07	6.50798e+07	5.05963e+07	1.62425e+08	5.92172e+07	2.01778e+07	6.19253e+07	4.83942e+07	3.20425e+07	4.52231e+07	3.05836e+07	5.0616e+07	4.20992e+07	1.07664e+08	5.29623e+07	6.49451e+07	1.49023e+08	5.10063e+07	5.11865e+07	1.1137e+08	4.11497e+07	4.36055e+07
ENSGMOP00000011615	4	4	497.126	0.818665	1.03825	0,5	2	pep:known_by_projection genescaffold:gadMor1:GeneScaffold_4322:239159:253143:-1 gene:ENSGMOG00000010854 transcript:ENSGMOT00000011931 gene_biotype:protein_coding transcript_biotype:protein_coding	338976	418646	463867	411335	362272	534021	458030	377939	406462	480283	361609	569497	372225	362289	418416	428615	492219	376151	414845	551501	387564	421251	455705	388164	384714	443850	395217	513107
ENSGMOP00000005975	7	7	991.385	0.00894904	1.12763	2	Kontrol	pep:known_by_projection genescaffold:gadMor1:GeneScaffold_3590:1737533:1743854:1 gene:ENSGMOG00000005602 transcript:ENSGMOT00000006149 gene_biotype:protein_coding transcript_biotype:protein_coding	985565	990258	900181	1.06667e+06	1.06326e+06	979561	937297	983817	940020	793172	1.1444e+06	1.20855e+06	1.07971e+06	932498	1.10452e+06	1.18382e+06	1.12863e+06	1.04447e+06	956480	1.10833e+06	1.00513e+06	1.00411e+06	956354	916827	948357	868601	990680	1.02154e+06
ENSGMOP00000016983	18	5	3494.28	0.0564332	1.72366	0,5	2	pep:novel genescaffold:gadMor1:GeneScaffold_1756:3923:4594:-1 gene:ENSGMOG00000015840 transcript:ENSGMOT00000017405 gene_biotype:protein_coding transcript_biotype:protein_coding	1.07221e+07	2.14464e+07	2.73639e+07	6.65793e+06	1.22317e+07	9.72223e+06	1.66437e+07	2.09708e+07	1.17231e+07	4.30043e+07	1.59161e+07	3.49391e+06	1.01097e+07	1.53702e+07	1.03701e+07	1.53726e+07	5.34631e+06	1.00236e+07	1.2554e+07	2.70984e+07	1.41912e+07	1.24999e+07	3.83233e+07	1.7591e+07	9.85682e+06	1.98882e+07	1.41154e+07	1.63136e+07
ENSGMOP00000006051	5	2	587.788	0.646252	1.13053	2	0,5	pep:known_by_projection genescaffold:gadMor1:GeneScaffold_2253:6252:49844:1 gene:ENSGMOG00000005687 transcript:ENSGMOT00000006226 gene_biotype:protein_coding transcript_biotype:protein_coding	146601	171219	151072	108002	152992	143496	64189.5	78367.3	100919	93676.1	177951	145753	136826	107026	98764.2	178933	76586.5	123945	111618	111133	81959	161265	167350	82253.8	165808	86204.8	78918.4	88877.5
ENSGMOP00000005951	1	1	100	0.695552	53.6041	0,5	2	pep:novel scaffold:gadMor1:scaffold04438:23080:24236:1 gene:ENSGMOG00000005608 transcript:ENSGMOT00000006124 gene_biotype:protein_coding transcript_biotype:protein_coding	196.184	0	432.822	0	474.949	0	0	0	201.691	0	0	0	0	0	0	111.418	0	0	209.873	0	0	0	0	16936.4	0	0	0	286.088
ENSGMOP00000004418	2	2	289.238	0.389773	1.23918	0,5	2	pep:known_by_projection genescaffold:gadMor1:GeneScaffold_4582:238528:242080:1 gene:ENSGMOG00000004176 transcript:ENSGMOT00000004553 gene_biotype:protein_coding transcript_biotype:protein_coding	234348	203106	136146	164373	217831	156954	210143	174407	139591	69783.2	88058.5	165819	184147	207537	206833	185046	126134	88044.2	83485.3	96984.1	260138	229862	138570	252711	151409	135847	200586	188332
ENSGMOP00000019766	5	4	495.257	0.900752	1.06947	0,5	Kontrol	pep:known_by_projection genescaffold:gadMor1:GeneScaffold_4523:189614:202166:-1 gene:ENSGMOG00000018355 transcript:ENSGMOT00000020246 gene_biotype:protein_coding transcript_biotype:protein_coding	321343	361958	389582	392808	420670	353517	242401	343988	307822	294392	475581	384731	314984	421582	285635	377173	287916	392204	249005	413281	293339	480503	476508	308289	439026	383680	211053	294302
ENSGMOP00000005784	6	5	599.772	0.90155	1.17408	2	0,5	pep:known_by_projection genescaffold:gadMor1:GeneScaffold_2060:33178:46654:-1 gene:ENSGMOG00000005439 transcript:ENSGMOT00000005953 gene_biotype:protein_coding transcript_biotype:protein_coding	451622	346461	279025	393082	323814	323433	310404	348913	222369	210983	215118	863750	170097	259585	582107	309130	293192	178573	265162	321688	236156	316873	358864	376968	305673	253165	187674	314578
ENSGMOP00000006026	3	3	400	0.44227	1.09224	Kontrol	2	pep:known_by_projection genescaffold:gadMor1:GeneScaffold_21:4157:9842:-1 gene:ENSGMOG00000005681 transcript:ENSGMOT00000006201 gene_biotype:protein_coding transcript_biotype:protein_coding	301108	297057	353633	303659	272099	273816	263119	369546	307128	230590	268480	259144	250127	301395	261186	307620	308857	243767	248129	253322	260636	363632	202978	265960	340249	299184	296391	327715
ENSGMOP00000014292	3	2	299.995	0.20358	1.42251	2	Kontrol	pep:known_by_projection genescaffold:gadMor1:GeneScaffold_2393:90329:97052:1 gene:ENSGMOG00000013367 transcript:ENSGMOT00000014662 gene_biotype:protein_coding transcript_biotype:protein_coding	72112.1	69586.6	60345.9	91354.6	71049.7	44757.2	42742.1	61609.3	44857	12997.7	113870	78040.5	45123.8	94076.9	172575	56509	71346	53889.1	46126.9	56463.4	58812.3	64185.3	44784	34732.8	54434.9	73444.4	75560.6	59112.6
ENSGMOP00000015880;ENSGMOP00000015893	9	8	1279.93	0.602249	1.0908	0,5	2	pep:known_by_projection genescaffold:gadMor1:GeneScaffold_3164:10174:16321:-1 gene:ENSGMOG00000014739 transcript:ENSGMOT00000016284 gene_biotype:protein_coding transcript_biotype:protein_coding	1.34403e+06	1.38037e+06	1.15855e+06	1.30103e+06	1.49666e+06	1.20494e+06	1.42596e+06	1.40084e+06	1.15184e+06	1.29908e+06	1.02364e+06	1.55281e+06	1.10455e+06	1.31526e+06	1.32953e+06	1.53376e+06	1.17583e+06	1.146e+06	1.23925e+06	1.20547e+06	1.41418e+06	1.66321e+06	2.01872e+06	1.53632e+06	981148	1.21664e+06	1.24277e+06	1.17919e+06
ENSGMOP00000010711	6	2	795.536	0.805947	1.07163	Kontrol	2	pep:known_by_projection genescaffold:gadMor1:GeneScaffold_4084:57804:60429:-1 gene:ENSGMOG00000010022 transcript:ENSGMOT00000011008 gene_biotype:protein_coding transcript_biotype:protein_coding	163428	127208	248010	135285	173338	146948	166993	182952	115521	118664	120852	145262	136911	122920	184635	183889	181419	116918	132759	140143	211722	153804	135291	158855	118206	152648	162381	115124
ENSGMOP00000003128	2	2	200	0.716077	1.10953	0,5	2	pep:known_by_projection genescaffold:gadMor1:GeneScaffold_4501:446990:457178:1 gene:ENSGMOG00000002968 transcript:ENSGMOT00000003226 gene_biotype:protein_coding transcript_biotype:protein_coding	190204	189215	104790	204772	285238	157900	294487	211003	210118	109400	94925.8	260040	208266	194789	226250	149484	200285	176327	136612	159361	191161	139236	152981	252983	217298	229542	282905	201898
ENSGMOP00000020228	6	6	981.557	0.111159	1.19564	Kontrol	2	pep:known_by_projection genescaffold:gadMor1:GeneScaffold_872:15659:17713:1 gene:ENSGMOG00000018838 transcript:ENSGMOT00000020727 gene_biotype:protein_coding transcript_biotype:protein_coding	2.33341e+06	2.16696e+06	2.27749e+06	2.11115e+06	2.64796e+06	1.80088e+06	2.13852e+06	2.13779e+06	1.9798e+06	1.29465e+06	1.87992e+06	2.79002e+06	1.58204e+06	1.86815e+06	1.60513e+06	1.52522e+06	1.55963e+06	1.23702e+06	1.67642e+06	2.32585e+06	2.43319e+06	2.00855e+06	1.45176e+06	2.17315e+06	2.07158e+06	1.94211e+06	1.95776e+06	1.63145e+06
ENSGMOP00000018428	8	6	997.607	0.896098	1.01912	Kontrol	0,5	pep:known_by_projection genescaffold:gadMor1:GeneScaffold_4461:297153:321911:-1 gene:ENSGMOG00000017131 transcript:ENSGMOT00000018880 gene_biotype:protein_coding transcript_biotype:protein_coding	793867	1.05944e+06	611328	749975	804919	970188	542748	708331	634577	1.02611e+06	892361	725415	658599	718309	783672	1.21574e+06	686601	673964	653645	554228	702092	1.11503e+06	1.2302e+06	677971	1.11337e+06	513286	565878	505865
ENSGMOP00000000073	6	5	699.88	0.382662	1.31317	2	Kontrol	pep:known_by_projection genescaffold:gadMor1:GeneScaffold_2466:24882:26542:1 gene:ENSGMOG00000000075 transcript:ENSGMOT00000000075 gene_biotype:protein_coding transcript_biotype:protein_coding	125323	191161	180502	143914	202768	192200	107890	116733	191892	112134	265221	257262	226764	304740	183970	93617.9	103298	238199	175962	226980	123651	133565	74809.8	139866	292370	208368	166846	212902
ENSGMOP00000011733;ENSGMOP00000013867;ENSGMOP00000017402	9	2	1171.24	0.680885	1.3181	2	Kontrol	pep:known_by_projection scaffold:gadMor1:scaffold12270:3382:4575:-1 gene:ENSGMOG00000010976 transcript:ENSGMOT00000012049 gene_biotype:protein_coding transcript_biotype:protein_coding	58957.9	135499	37769.4	42343.4	130479	123655	52459.9	79062.5	69738.7	116921	96625.9	67780.3	99100.8	90019.6	34211.8	373053	51323.8	127618	64917.9	30187.2	63809.9	148138	188555	97886.4	156891	22389.6	36192.7	40690
ENSGMOP00000009311	78	69	10935.4	0.460157	1.0854	Kontrol	2	pep:known_by_projection genescaffold:gadMor1:GeneScaffold_3708:63964:112266:1 gene:ENSGMOG00000008663 transcript:ENSGMOT00000009564 gene_biotype:protein_coding transcript_biotype:protein_coding	1.86047e+07	1.55308e+07	2.26519e+07	1.86454e+07	1.80119e+07	1.40659e+07	1.98041e+07	2.24235e+07	1.79696e+07	1.6735e+07	1.66147e+07	1.51178e+07	1.44443e+07	1.7748e+07	1.88964e+07	1.75355e+07	1.95372e+07	1.70797e+07	1.59639e+07	2.2503e+07	1.95911e+07	1.87323e+07	1.36259e+07	1.65879e+07	1.70384e+07	1.71821e+07	1.64342e+07	1.97247e+07
ENSGMOP00000009973	3	3	300	0.467434	1.09083	Kontrol	2	pep:known_by_projection genescaffold:gadMor1:GeneScaffold_4113:44778:54279:1 gene:ENSGMOG00000009338 transcript:ENSGMOT00000010242 gene_biotype:protein_coding transcript_biotype:protein_coding	715885	654903	794549	884816	604951	688230	701040	699747	650261	603988	635171	421792	649406	687962	629038	562359	719459	769093	699775	795647	573779	896773	547047	652238	737703	526555	607707	816291
ENSGMOP00000016951	2	2	198.061	0.501037	1.13555	Kontrol	2	pep:known_by_projection genescaffold:gadMor1:GeneScaffold_1963:667810:671422:1 gene:ENSGMOG00000015812 transcript:ENSGMOT00000017374 gene_biotype:protein_coding transcript_biotype:protein_coding	102265	80222.4	110673	104017	85096.2	64696.7	51294.7	91768.1	106546	79931.9	131787	91162.2	55574.7	51716.3	65405.7	77267.2	52118.6	83559	86104.6	144862	85478.4	73626.7	89680	59291.2	74215.2	81783.9	69515.8	72826.9
ENSGMOP00000003826	1	1	100	0.633709	1.51794	2	Kontrol	pep:known_by_projection genescaffold:gadMor1:GeneScaffold_3654:100796:102215:1 gene:ENSGMOG00000003626 transcript:ENSGMOT00000003942 gene_biotype:protein_coding transcript_biotype:protein_coding	270217	317684	70525.9	138094	331690	389327	91484	28695.4	190044	140082	393134	596870	347361	254930	57729.3	506933	63095.8	185387	282924	297268	10434	263122	238274	192875	193528	487727	234683	325471
ENSGMOP00000006396;ENSGMOP00000006421	3	3	399.569	0.866752	1.04863	2	Kontrol	pep:known_by_projection genescaffold:gadMor1:GeneScaffold_3590:2085167:2086928:1 gene:ENSGMOG00000006030 transcript:ENSGMOT00000006584 gene_biotype:protein_coding transcript_biotype:protein_coding	319346	161219	301032	211638	195968	90195.8	189210	148328	120527	165013	287263	123512	236765	188353	275051	130244	207187	141906	205208	156788	219744	146356	236606	157795	297377	173107	218811	154385
ENSGMOP00000008444	16	6	2898.52	0.409181	1.32795	2	0,5	pep:known_by_projection genescaffold:gadMor1:GeneScaffold_2809:34115:37512:1 gene:ENSGMOG00000007893 transcript:ENSGMOT00000008682 gene_biotype:protein_coding transcript_biotype:protein_coding	1.27708e+07	1.45994e+07	1.88673e+07	1.06398e+07	6.85122e+06	2.30336e+07	1.31496e+07	1.48542e+07	1.39672e+07	2.06357e+07	2.66812e+07	2.95157e+07	1.48577e+07	1.55513e+07	2.89464e+07	1.93852e+07	1.09031e+07	9.86153e+06	9.24488e+06	1.50783e+07	1.8582e+07	1.27581e+07	2.29003e+07	8.90843e+06	1.23807e+07	1.42502e+07	1.14484e+07	7.90494e+06
ENSGMOP00000014852	11	11	1697.18	0.287435	1.29776	Kontrol	2	pep:known_by_projection genescaffold:gadMor1:GeneScaffold_1253:26873:32708:1 gene:ENSGMOG00000013916 transcript:ENSGMOT00000015235 gene_biotype:protein_coding transcript_biotype:protein_coding	8.6756e+06	7.25501e+06	1.60618e+07	1.43225e+07	8.5824e+06	7.35602e+06	1.17124e+07	1.91351e+07	1.86684e+07	1.17408e+07	1.19095e+07	7.91906e+06	6.38336e+06	1.00077e+07	6.70605e+06	6.27577e+06	8.11337e+06	1.3508e+07	1.48314e+07	1.45979e+07	1.80129e+07	1.14534e+07	6.2248e+06	1.07292e+07	1.24628e+07	1.19669e+07	8.82389e+06	7.83117e+06
ENSGMOP00000012764	13	11	1967.99	0.00492667	1.20805	Kontrol	2	pep:known_by_projection genescaffold:gadMor1:GeneScaffold_4488:86768:93230:-1 gene:ENSGMOG00000011935 transcript:ENSGMOT00000013102 gene_biotype:protein_coding transcript_biotype:protein_coding	3.40091e+06	2.93226e+06	4.70802e+06	3.51245e+06	3.10943e+06	3.21555e+06	3.59755e+06	3.93888e+06	3.80211e+06	4.14312e+06	2.88828e+06	2.67611e+06	3.15504e+06	3.17353e+06	2.70753e+06	2.79254e+06	3.40389e+06	3.42331e+06	2.86822e+06	4.43424e+06	3.81195e+06	3.207e+06	3.06025e+06	3.44971e+06	3.3659e+06	3.66008e+06	3.39472e+06	3.44508e+06
ENSGMOP00000008270	2	1	299.731	0.426771	1.22683	2	0,5	pep:known_by_projection genescaffold:gadMor1:GeneScaffold_2976:818:15088:-1 gene:ENSGMOG00000007736 transcript:ENSGMOT00000008505 gene_biotype:protein_coding transcript_biotype:protein_coding	92910.5	142235	61354.2	88818.3	104922	110449	35520.6	50885.1	61255.6	79372.7	88915.6	123356	100580	87725.7	68732.1	177535	61813.9	92101.5	65280.1	51889.8	58652.3	111868	140376	64654.8	126745	63488.8	32426.8	55814.4
ENSGMOP00000006257	4	4	500	0.908417	1.03349	Kontrol	0,5	pep:known_by_projection genescaffold:gadMor1:GeneScaffold_672:119881:127071:1 gene:ENSGMOG00000005881 transcript:ENSGMOT00000006438 gene_biotype:protein_coding transcript_biotype:protein_coding	745617	663428	863230	685369	664700	573781	630169	818731	623752	508551	611998	678173	640226	655712	766294	720770	765099	589915	566595	683406	742958	664717	668747	627975	690734	563301	667684	592412
ENSGMOP00000020011	2	2	200	0.0439804	1.32203	2	Kontrol	pep:known_by_projection genescaffold:gadMor1:GeneScaffold_3443:112175:138839:-1 gene:ENSGMOG00000018593 transcript:ENSGMOT00000020502 gene_biotype:protein_coding transcript_biotype:protein_coding	99259.7	95468	84040.1	96232.8	120659	111088	140408	91584.2	77706.2	66205.9	102541	199900	126941	110439	157510	127032	154136	76315.7	114370	103935	118918	94460.1	96533.3	92724.5	79083.5	81413.5	113097	140768
ENSGMOP00000010398	2	1	200	0.773396	1.40235	Kontrol	2	pep:known_by_projection genescaffold:gadMor1:GeneScaffold_1986:11284:20495:1 gene:ENSGMOG00000009724 transcript:ENSGMOT00000010680 gene_biotype:protein_coding transcript_biotype:protein_coding	5487.34	2115.04	6080.55	1357.43	7698.58	1789.88	1641.68	6776.87	2554.07	1283.81	2361.03	1210.9	2149.43	4501.13	2278.63	3592.98	2355.87	1922.68	3235.4	2547.74	5220.87	2193.35	1706	2793.11	4145.91	2922.64	3192.77	1137.04
ENSGMOP00000011729	1	1	200	0.908366	1.05167	Kontrol	0,5	pep:known_by_projection genescaffold:gadMor1:GeneScaffold_960:363640:364143:1 gene:ENSGMOG00000010972 transcript:ENSGMOT00000012045 gene_biotype:protein_coding transcript_biotype:protein_coding	874722	848203	718091	646287	851919	711348	443094	694691	477044	486721	919372	737479	538021	581474	719122	731225	535535	577960	516643	579547	569031	688370	889079	560641	893536	568840	468079	561238
ENSGMOP00000004842	2	1	298.762	0.87767	1.03015	0,5	Kontrol	pep:known_by_projection genescaffold:gadMor1:GeneScaffold_306:10205:14161:1 gene:ENSGMOG00000004563 transcript:ENSGMOT00000004983 gene_biotype:protein_coding transcript_biotype:protein_coding	1.2499e+06	1.2825e+06	1.86883e+06	1.73919e+06	1.35725e+06	1.47837e+06	1.24658e+06	1.67322e+06	1.25659e+06	1.65082e+06	1.27665e+06	1.38028e+06	1.52761e+06	1.4397e+06	1.3252e+06	1.51301e+06	1.82831e+06	1.98333e+06	1.44818e+06	2.0417e+06	1.41135e+06	1.37429e+06	1.22153e+06	1.45731e+06	1.59115e+06	1.49039e+06	1.75565e+06	1.38119e+06
ENSGMOP00000016838	6	5	774.872	0.0159213	1.52156	Kontrol	2	pep:known_by_projection genescaffold:gadMor1:GeneScaffold_3050:108873:114025:1 gene:ENSGMOG00000015697 transcript:ENSGMOT00000017257 gene_biotype:protein_coding transcript_biotype:protein_coding	1.24054e+06	1.24758e+06	2.26274e+06	1.08686e+06	973392	1.30855e+06	1.26291e+06	1.78281e+06	1.16426e+06	2.66209e+06	1.19207e+06	775733	1.12573e+06	1.02062e+06	890773	1.07511e+06	886713	951669	949140	1.6018e+06	1.24859e+06	1.33705e+06	2.64441e+06	1.12969e+06	1.20134e+06	1.64639e+06	986047	927778
ENSGMOP00000013504	7	7	1400	0.865137	1.03418	Kontrol	2	pep:known_by_projection genescaffold:gadMor1:GeneScaffold_1579:1364879:1368810:1 gene:ENSGMOG00000012628 transcript:ENSGMOT00000013861 gene_biotype:protein_coding transcript_biotype:protein_coding	4.05637e+06	3.83081e+06	3.69485e+06	4.39856e+06	4.58102e+06	4.2604e+06	4.99942e+06	5.0047e+06	5.25513e+06	5.92602e+06	3.39118e+06	4.49664e+06	4.57942e+06	4.35175e+06	3.87774e+06	4.21321e+06	4.65998e+06	5.52319e+06	4.9448e+06	5.35319e+06	3.5644e+06	3.96974e+06	3.77372e+06	4.87539e+06	4.25874e+06	4.79091e+06	4.61215e+06	4.97865e+06
ENSGMOP00000010348	25	3	4383.26	0.272244	1.1484	Kontrol	2	pep:known scaffold:gadMor1:scaffold00246:19007:20799:-1 gene:ENSGMOG00000009683 transcript:ENSGMOT00000010630 gene_biotype:protein_coding transcript_biotype:protein_coding	8.07445e+06	1.15041e+07	1.07645e+07	1.07942e+07	1.02788e+07	8.1974e+06	9.04073e+06	1.54282e+07	1.06874e+07	8.71994e+06	1.06795e+07	9.07675e+06	6.8527e+06	9.00477e+06	9.46592e+06	1.17191e+07	9.70166e+06	6.19675e+06	8.40783e+06	9.24621e+06	1.16309e+07	9.99563e+06	9.04825e+06	1.00285e+07	1.36674e+07	8.9625e+06	8.56219e+06	8.15637e+06
ENSGMOP00000019725	17	16	2894.18	0.80105	1.06676	2	Kontrol	pep:known_by_projection genescaffold:gadMor1:GeneScaffold_1038:123638:138525:1 gene:ENSGMOG00000018313 transcript:ENSGMOT00000020204 gene_biotype:protein_coding transcript_biotype:protein_coding	3.87006e+06	4.50184e+06	5.00231e+06	5.42714e+06	5.17946e+06	4.95172e+06	7.60043e+06	4.08359e+06	5.54756e+06	4.66163e+06	4.77404e+06	7.70712e+06	5.42708e+06	4.76073e+06	5.34506e+06	3.80063e+06	6.29935e+06	5.25855e+06	5.42426e+06	7.11998e+06	3.67014e+06	4.94198e+06	3.70748e+06	5.05774e+06	4.41947e+06	6.56613e+06	5.84478e+06	6.92414e+06
ENSGMOP00000010037	1	1	200	0.81949	1.10996	0,5	2	pep:known_by_projection genescaffold:gadMor1:GeneScaffold_1883:476531:479049:-1 gene:ENSGMOG00000009399 transcript:ENSGMOT00000010307 gene_biotype:protein_coding transcript_biotype:protein_coding	277382	361637	190087	235559	219619	290226	194489	279877	272132	550800	285508	155226	349571	341790	238487	309773	240980	305063	231265	307580	214665	253159	573552	360139	288738	249720	230032	250322
ENSGMOP00000000537	10	8	1475.35	0.856456	1.03481	Kontrol	0,5	pep:known_by_projection genescaffold:gadMor1:GeneScaffold_4562:156234:164366:1 gene:ENSGMOG00000000548 transcript:ENSGMOT00000000565 gene_biotype:protein_coding transcript_biotype:protein_coding	4.65879e+06	4.92305e+06	3.33349e+06	4.99661e+06	5.42944e+06	4.38882e+06	5.39842e+06	5.5508e+06	5.36641e+06	3.66993e+06	4.47367e+06	5.9491e+06	4.50076e+06	4.50406e+06	4.78341e+06	4.53162e+06	5.02963e+06	4.99009e+06	4.14399e+06	5.03917e+06	4.61294e+06	4.30382e+06	4.28408e+06	5.30805e+06	4.69478e+06	3.74256e+06	5.1772e+06	4.33713e+06
ENSGMOP00000011292	1	1	100	0.0399903	1.31147	2	Kontrol	pep:known_by_projection genescaffold:gadMor1:GeneScaffold_3695:16366:23581:1 gene:ENSGMOG00000010549 transcript:ENSGMOT00000011596 gene_biotype:protein_coding transcript_biotype:protein_coding	54300.7	95056.9	50662.2	85233.5	88388.7	145599	79206.9	46576.5	63163.5	74698.1	77540	138543	84938.6	82955.3	107547	99594.7	117483	103530	111925	61348.4	71405.8	65288.8	92971.8	77513.5	70650.5	110043	62125.4	107888
ENSGMOP00000005276;ENSGMOP00000005285;ENSGMOP00000018259;ENSGMOP00000018263	1	1	100	0.829041	1.2127	0,5	2	pep:known genescaffold:gadMor1:GeneScaffold_3789:127808:129361:-1 gene:ENSGMOG00000004967 transcript:ENSGMOT00000005434 gene_biotype:protein_coding transcript_biotype:protein_coding	202220	189497	80248.4	111696	194479	378689	123289	115155	171103	151657	120089	227970	224401	112039	109913	126033	144637	174234	178483	133403	129530	277910	405631	198892	244000	104773	93957.5	131273
ENSGMOP00000017507	2	2	199.94	0.172608	1.23076	2	0,5	pep:known_by_projection genescaffold:gadMor1:GeneScaffold_3550:85617:91666:1 gene:ENSGMOG00000016319 transcript:ENSGMOT00000017939 gene_biotype:protein_coding transcript_biotype:protein_coding	41526.4	43855.9	69970.4	44699	45231.9	46790.1	53576.4	27353	45743.2	39300.4	60779.2	77539.9	66350.1	36548.3	46090.5	58414	53682.9	46946	47026.1	57696.1	37578.2	49050.6	32316.5	29657	25521	68919.5	44337.7	55794.9
ENSGMOP00000006488	2	2	200	0.51723	1.12648	2	0,5	pep:known_by_projection genescaffold:gadMor1:GeneScaffold_1302:154007:159883:-1 gene:ENSGMOG00000006116 transcript:ENSGMOT00000006679 gene_biotype:protein_coding transcript_biotype:protein_coding	128707	115818	111940	121319	134908	107171	158923	106290	115771	112096	123572	236924	111032	119931	125363	97909.5	126841	137869	119306	146310	97491	76844.2	137053	117645	104300	101865	136704	145943
ENSGMOP00000018048	3	2	298.741	0.109155	1.57596	2	0,5	pep:known_by_projection genescaffold:gadMor1:GeneScaffold_3153:112406:128752:1 gene:ENSGMOG00000016793 transcript:ENSGMOT00000018493 gene_biotype:protein_coding transcript_biotype:protein_coding	74904.7	64175.4	28881.8	35526.4	63371	32886	28304.7	56991.2	23333.3	12922.7	27943.1	45132.8	81813.9	73174	88921.1	109144	68047.1	39279.7	48460.7	6804.73	52074.1	15912.8	50840.5	64912.6	35083.4	31084	85515.4	27019.1
ENSGMOP00000007337	3	3	300	0.517665	1.88298	0,5	2	pep:known_by_projection genescaffold:gadMor1:GeneScaffold_3590:3473685:3483238:1 gene:ENSGMOG00000006883 transcript:ENSGMOT00000007546 gene_biotype:protein_coding transcript_biotype:protein_coding	63813.1	37860	189810	65752.6	43086.7	48349.1	116130	38624.4	76792.1	50407.6	46293	44814.3	51967.5	46152	99779	50377.6	31873.3	85852.3	38686.6	66764.7	34916	378356	42017.2	31046	198242	71475.5	64314	46439.7
ENSGMOP00000001020	1	1	100	0.824577	1.24133	0,5	Kontrol	pep:known_by_projection genescaffold:gadMor1:GeneScaffold_4252:62939:77454:-1 gene:ENSGMOG00000000974 transcript:ENSGMOT00000001057 gene_biotype:protein_coding transcript_biotype:protein_coding	1178.09	2294.84	959.869	1628.33	1447.45	3545.09	1475.66	1994.62	1625.07	1212.88	3660.79	2832.09	2519.22	1543.56	53.3382	1651.71	2839.26	1719.05	2194.69	3480.03	3585.79	2283.24	975.341	817.575	1811.03	3245.47	1209.02	1989.09
ENSGMOP00000014625	3	3	387.489	0.231421	1.15101	2	0,5	pep:known_by_projection genescaffold:gadMor1:GeneScaffold_4267:5899:18536:-1 gene:ENSGMOG00000013693 transcript:ENSGMOT00000015001 gene_biotype:protein_coding transcript_biotype:protein_coding	905541	943430	976228	1.12944e+06	890725	1.38625e+06	1.10923e+06	833708	892828	1.1755e+06	963900	1.23027e+06	1.58308e+06	1.01385e+06	1.21314e+06	884064	1.14577e+06	1.02273e+06	1.27797e+06	1.20659e+06	942061	1.11487e+06	715335	824455	745974	929746	1.2141e+06	1.28574e+06
ENSGMOP00000010901	2	2	398.439	0.0174586	1.44392	Kontrol	2	pep:known_by_projection genescaffold:gadMor1:GeneScaffold_4551:198099:201984:1 gene:ENSGMOG00000010193 transcript:ENSGMOT00000011199 gene_biotype:protein_coding transcript_biotype:protein_coding	277794	246933	300347	255841	305842	231978	447358	353122	361505	261816	125467	202329	189039	192440	139790	235018	209662	241954	360725	515780	174036	265740	217403	266445	264379	212909	310358	469309
ENSGMOP00000000956;ENSGMOP00000008607	3	3	380.943	0.624351	1.08893	2	0,5	pep:known_by_projection genescaffold:gadMor1:GeneScaffold_345:12877:13276:1 gene:ENSGMOG00000000944 transcript:ENSGMOT00000000992 gene_biotype:protein_coding transcript_biotype:protein_coding	796256	685161	527851	675690	632410	755678	710467	898837	676377	747497	795990	1.01459e+06	742578	683843	901349	834775	594525	653965	532943	706880	845313	663399	849484	696199	552453	628653	691486	569075
ENSGMOP00000010128;ENSGMOP00000010185;ENSGMOP00000010203;ENSGMOP00000010240;ENSGMOP00000010290;ENSGMOP00000010304	3	3	398.742	0.422662	1.1849	2	0,5	pep:known_by_projection genescaffold:gadMor1:GeneScaffold_752:164152:193165:-1 gene:ENSGMOG00000009420 transcript:ENSGMOT00000010403 gene_biotype:protein_coding transcript_biotype:protein_coding	171890	190185	201798	161644	133091	216737	268968	137793	195795	198506	303460	292570	218803	143354	214355	216344	206346	115442	208512	142806	193344	212779	239015	115078	177974	171445	228294	138964
ENSGMOP00000002534	4	3	593.363	0.54323	1.16017	Kontrol	2	pep:known_by_projection genescaffold:gadMor1:GeneScaffold_4238:210376:215086:1 gene:ENSGMOG00000002394 transcript:ENSGMOT00000002617 gene_biotype:protein_coding transcript_biotype:protein_coding	207538	228999	192353	184025	231143	230515	468847	203538	180560	140047	145340	365047	193677	150516	241537	174218	191858	136464	160404	274669	176689	194116	250242	249002	133493	205978	199261	193566
ENSGMOP00000007343	15	14	1881.88	0.778336	1.03149	Kontrol	2	pep:known_by_projection genescaffold:gadMor1:GeneScaffold_3340:11860:32623:-1 gene:ENSGMOG00000006894 transcript:ENSGMOT00000007552 gene_biotype:protein_coding transcript_biotype:protein_coding	2.99773e+06	3.02504e+06	3.19867e+06	3.22001e+06	3.05111e+06	3.1306e+06	2.70836e+06	3.32868e+06	3.08476e+06	2.80193e+06	2.87534e+06	2.821e+06	3.0894e+06	3.22585e+06	2.87424e+06	3.18037e+06	2.80636e+06	3.1273e+06	2.65299e+06	3.15005e+06	3.06443e+06	3.20903e+06	3.44005e+06	3.07112e+06	3.27302e+06	2.12089e+06	3.0609e+06	2.78753e+06
ENSGMOP00000018318;ENSGMOP00000018337;ENSGMOP00000018369;ENSGMOP00000018375;ENSGMOP00000018388;ENSGMOP00000018395;ENSGMOP00000018429	3	3	299.996	0.200172	1.12359	Kontrol	2	pep:known_by_projection genescaffold:gadMor1:GeneScaffold_3222:345830:355496:-1 gene:ENSGMOG00000016923 transcript:ENSGMOT00000018767 gene_biotype:protein_coding transcript_biotype:protein_coding	286846	271257	379008	273089	257140	261862	244160	283067	285085	285594	285795	314791	224131	222501	258819	269941	238119	242339	208095	353728	275624	356148	226491	229160	307697	248637	234686	264013
ENSGMOP00000013218	1	1	100	0.544718	1.27492	Kontrol	2	pep:known_by_projection genescaffold:gadMor1:GeneScaffold_4340:1555907:1558956:1 gene:ENSGMOG00000012353 transcript:ENSGMOT00000013569 gene_biotype:protein_coding transcript_biotype:protein_coding	167231	119450	199984	72305.3	128675	68420.7	91316.9	154567	108845	48388.7	108656	98310	64473.1	106047	87871.7	101747	75352.4	77635.3	98205.1	105609	181396	69439.6	99914.6	106343	124324	111800	85056.8	60159.8
ENSGMOP00000003356	1	1	100	0.759003	1.11303	0,5	2	pep:known_by_projection genescaffold:gadMor1:GeneScaffold_3189:191185:193341:1 gene:ENSGMOG00000003197 transcript:ENSGMOT00000003458 gene_biotype:protein_coding transcript_biotype:protein_coding	134994	118090	87296.2	116037	115888	91493.6	139349	101236	51065.7	53058.9	56092.9	139329	121806	123779	141177	111706	74833.1	54464.6	51151.2	48528.9	80174.8	153858	96883.1	138552	90674.3	120868	107294	136336
ENSGMOP00000007562	3	3	388.435	0.919483	1.02215	Kontrol	2	pep:novel genescaffold:gadMor1:GeneScaffold_359:14994:37670:1 gene:ENSGMOG00000007101 transcript:ENSGMOT00000007779 gene_biotype:protein_coding transcript_biotype:protein_coding	538718	511860	648246	519557	523627	618462	520681	518114	615933	751492	584438	523630	558345	563495	517521	536111	602451	587008	604572	717346	578324	619485	559968	505663	518910	404724	501287	688413
ENSGMOP00000022059	5	5	599.163	0.882175	1.19474	2	0,5	pep:known genescaffold:gadMor1:GeneScaffold_588:61086:61694:1 gene:ENSGMOG00000020572 transcript:ENSGMOT00000022577 gene_biotype:protein_coding transcript_biotype:protein_coding	1.36954e+06	2.24558e+06	3.50442e+06	2.27894e+06	1.41438e+06	1.87873e+06	902278	660451	1.50643e+06	654472	1.1118e+06	1.23339e+06	600614	1.83127e+06	1.58056e+06	2.51648e+06	4.05153e+06	828944	1.56051e+06	827136	925859	1.17037e+06	2.86585e+06	1.25425e+06	1.81289e+06	1.8468e+06	1.33523e+06	780420
ENSGMOP00000002263	7	6	1177.69	0.052472	1.25807	0,5	2	pep:known genescaffold:gadMor1:GeneScaffold_1913:76734:79023:-1 gene:ENSGMOG00000002124 transcript:ENSGMOT00000002338 gene_biotype:protein_coding transcript_biotype:protein_coding	1.58803e+06	1.21212e+06	2.03036e+06	2.19891e+06	1.40179e+06	1.54496e+06	1.7684e+06	1.95915e+06	1.87038e+06	2.04074e+06	1.75226e+06	1.4498e+06	1.32582e+06	1.11595e+06	992669	1.50886e+06	1.46977e+06	1.78797e+06	1.73288e+06	2.68769e+06	2.01257e+06	2.04054e+06	1.41895e+06	1.69187e+06	1.97803e+06	1.78662e+06	1.54099e+06	1.36869e+06
ENSGMOP00000003913	1	1	100	0.125752	1.47909	2	0,5	pep:known_by_projection genescaffold:gadMor1:GeneScaffold_3327:12073:14714:1 gene:ENSGMOG00000003682 transcript:ENSGMOT00000004032 gene_biotype:protein_coding transcript_biotype:protein_coding	6078.79	11345.3	5572.92	16966.8	20324.3	6015.8	14864.2	20699.8	7824.12	7139.62	9828.74	8520.28	20989.9	13237.6	13765.1	19235.8	23739	17268.8	12620	7288.68	14688.3	11283.6	12814.2	13359.7	4201.03	9013.75	16756.3	4709.97
ENSGMOP00000021984	14	10	2284.88	0.0342234	2.07031	0,5	2	pep:known contig::contig139864:363:584:-1 gene:ENSGMOG00000020497 transcript:ENSGMOT00000022502 gene_biotype:protein_coding transcript_biotype:protein_coding	3.09267e+07	5.55801e+07	9.41729e+07	5.58725e+07	2.37108e+07	6.10134e+07	5.11501e+07	8.07873e+07	4.27758e+07	1.98667e+08	5.53625e+07	1.99557e+07	2.73865e+07	3.44411e+07	3.06737e+07	2.1095e+07	2.94646e+07	4.66398e+07	5.80193e+07	1.23158e+08	7.13884e+07	5.23931e+07	1.43736e+08	5.85799e+07	4.03696e+07	9.53715e+07	1.99652e+07	6.38276e+07
ENSGMOP00000009291	7	7	1073.27	0.888519	1.03905	2	Kontrol	pep:known_by_projection genescaffold:gadMor1:GeneScaffold_2167:100016:102629:-1 gene:ENSGMOG00000008681 transcript:ENSGMOT00000009543 gene_biotype:protein_coding transcript_biotype:protein_coding	1.25546e+06	1.11773e+06	2.14845e+06	1.73099e+06	1.28257e+06	1.09264e+06	1.41478e+06	1.60357e+06	1.26923e+06	1.03826e+06	1.49197e+06	1.29271e+06	1.12867e+06	1.12227e+06	1.89396e+06	1.64247e+06	1.96683e+06	1.20122e+06	1.30858e+06	1.81003e+06	1.66653e+06	1.69996e+06	1.28147e+06	1.19369e+06	1.28221e+06	1.05134e+06	1.38636e+06	1.54309e+06
ENSGMOP00000016493	1	1	100	0.913474	1.32701	0,5	Kontrol	pep:known_by_projection genescaffold:gadMor1:GeneScaffold_3769:192505:194657:-1 gene:ENSGMOG00000015401 transcript:ENSGMOT00000016909 gene_biotype:protein_coding transcript_biotype:protein_coding	207148	303033	64826.8	171149	241954	268121	111968	23807.9	218678	218128	381102	420691	340233	294720	33000.2	52574.2	57075.1	305647	285916	274040	18385.5	348202	314161	177630	340998	465219	62897	182637
ENSGMOP00000014559	4	4	485.98	0.172775	4.00777	0,5	2	pep:known_by_projection genescaffold:gadMor1:GeneScaffold_4633:48623:59155:1 gene:ENSGMOG00000013625 transcript:ENSGMOT00000014933 gene_biotype:protein_coding transcript_biotype:protein_coding	203321	131773	645630	276690	439788	144497	144375	409561	622000	131522	143314	142627	90757	305223	112616	141732	180970	273192	134263	296742	210177	301066	163816	4.34087e+06	217303	155430	152114	273114
ENSGMOP00000000120	26	22	3290.73	0.79312	1.07944	0,5	2	pep:known_by_projection genescaffold:gadMor1:GeneScaffold_1202:56896:62609:1 gene:ENSGMOG00000000117 transcript:ENSGMOT00000000123 gene_biotype:protein_coding transcript_biotype:protein_coding	9.61726e+06	6.80525e+06	9.31547e+06	9.62237e+06	8.03284e+06	4.80977e+06	1.15783e+07	1.19941e+07	6.48663e+06	4.02326e+06	5.30694e+06	7.54577e+06	5.7824e+06	5.4278e+06	1.38223e+07	8.21479e+06	1.39597e+07	5.10636e+06	6.65612e+06	6.51493e+06	1.40394e+07	1.17737e+07	8.28302e+06	8.52978e+06	7.21828e+06	5.57285e+06	7.77724e+06	7.8184e+06
ENSGMOP00000004567	8	2	899.671	0.417623	1.15048	0,5	2	pep:known_by_projection genescaffold:gadMor1:GeneScaffold_2686:61859:64905:-1 gene:ENSGMOG00000004215 transcript:ENSGMOT00000004705 gene_biotype:protein_coding transcript_biotype:protein_coding	232169	196521	205275	293262	261064	202132	281885	311334	272588	237938	212410	292218	188512	213742	213525	212201	233773	241678	248047	290662	252562	261168	174739	213376	256464	192754	318591	405189
ENSGMOP00000011432	1	1	99.8923	0.783466	1.10051	0,5	2	pep:known_by_projection genescaffold:gadMor1:GeneScaffold_2822:4539:30111:1 gene:ENSGMOG00000010672 transcript:ENSGMOT00000011742 gene_biotype:protein_coding transcript_biotype:protein_coding	105228	45337.4	84646.1	70272	68798.8	59326.4	93113.4	57637.7	87559.6	51177.3	78934.6	77810.9	66453.1	51543.4	81150.9	50134.3	55591.1	76638.1	77663.3	82884.2	83506.4	90014.7	47864.4	53562	68684.9	112677	69356.4	69274.4
ENSGMOP00000007686;ENSGMOP00000007688;ENSGMOP00000007694	5	1	599.449	0.0840504	1.55919	0,5	2	pep:known_by_projection genescaffold:gadMor1:GeneScaffold_1288:264275:267040:1 gene:ENSGMOG00000007205 transcript:ENSGMOT00000007907 gene_biotype:protein_coding transcript_biotype:protein_coding	64127.4	45288.9	192112	97130.9	107077	38067.7	54111	73706	122842	64757.2	102803	55222.3	27661.4	81832.9	32290.7	45627.4	39173.2	68915.2	60001.6	125161	141153	95249.1	53268.4	132315	71748.2	69873.6	54649.6	57267.3
ENSGMOP00000000055	2	2	297.599	0.705284	1.0818	0,5	2	pep:known_by_projection genescaffold:gadMor1:GeneScaffold_3824:51741:54433:1 gene:ENSGMOG00000000054 transcript:ENSGMOT00000000057 gene_biotype:protein_coding transcript_biotype:protein_coding	327174	300391	607352	418999	291176	339503	399992	415411	333728	402021	372719	359883	334588	291230	386562	386257	425206	455648	266708	580331	343466	423653	369618	369918	309823	342445	387449	420313
ENSGMOP00000005485	5	5	1000	0.903294	1.17117	0,5	Kontrol	pep:known_by_projection genescaffold:gadMor1:GeneScaffold_4076:31461:36493:1 gene:ENSGMOG00000005179 transcript:ENSGMOT00000005648 gene_biotype:protein_coding transcript_biotype:protein_coding	3.58473e+06	5.62271e+06	4.57293e+06	7.49012e+06	5.49015e+06	5.4421e+06	6.75624e+06	4.20374e+06	8.4693e+06	4.6595e+06	8.3616e+06	5.11394e+06	7.80537e+06	8.33756e+06	3.326e+06	3.57017e+06	4.81422e+06	7.65199e+06	6.62539e+06	1.07007e+07	3.14267e+06	4.62282e+06	2.51306e+06	4.43656e+06	9.36004e+06	1.12648e+07	6.09902e+06	7.19447e+06
ENSGMOP00000020658	26	24	3799.29	0.905288	1.03958	Kontrol	0,5	pep:known_by_projection genescaffold:gadMor1:GeneScaffold_2632:165569:171373:1 gene:ENSGMOG00000019203 transcript:ENSGMOT00000021164 gene_biotype:protein_coding transcript_biotype:protein_coding	2.67165e+07	2.82362e+07	3.47472e+07	2.75546e+07	3.18489e+07	3.00264e+07	4.0921e+07	3.21705e+07	2.84485e+07	2.38863e+07	2.66595e+07	4.81046e+07	2.31648e+07	2.18955e+07	3.01331e+07	2.91618e+07	3.78843e+07	2.58693e+07	2.80267e+07	3.15657e+07	2.81235e+07	2.85556e+07	2.87241e+07	3.06117e+07	2.61456e+07	3.00874e+07	3.1548e+07	2.83028e+07
ENSGMOP00000000521	4	2	498.904	0.429897	1.09386	2	0,5	pep:known scaffold:gadMor1:scaffold00125:62423:64706:-1 gene:ENSGMOG00000000532 transcript:ENSGMOT00000000549 gene_biotype:protein_coding transcript_biotype:protein_coding	190944	234282	236389	206287	271138	267034	173816	153040	187539	239134	248670	260797	212709	259306	219908	196159	208245	230327	229316	225422	193251	238471	237839	160260	213514	147052	201157	271252
ENSGMOP00000009241	7	7	999.406	0.89463	1.01701	2	0,5	pep:known_by_projection genescaffold:gadMor1:GeneScaffold_2974:17939:32840:1 gene:ENSGMOG00000008637 transcript:ENSGMOT00000009493 gene_biotype:protein_coding transcript_biotype:protein_coding	710877	803827	718566	672672	736372	720342	635393	674558	643119	694342	694891	781288	604945	658752	677021	849373	710620	681587	687056	815499	660926	762147	769905	719117	703203	449392	674358	684839
ENSGMOP00000009008;ENSGMOP00000017525	4	4	400	0.0112328	1.18744	0,5	2	pep:known_by_projection genescaffold:gadMor1:GeneScaffold_1210:72618:86011:-1 gene:ENSGMOG00000008415 transcript:ENSGMOT00000009254 gene_biotype:protein_coding transcript_biotype:protein_coding	909048	893994	784920	828627	762078	838871	680128	823897	689571	867453	590376	625966	718729	719839	737176	838898	747951	689541	612775	751660	886217	901375	904105	1.04989e+06	829112	754185	659114	722976
ENSGMOP00000002344	4	4	580.137	0.0537924	1.20855	2	Kontrol	pep:known_by_projection genescaffold:gadMor1:GeneScaffold_1054:121:15239:-1 gene:ENSGMOG00000002166 transcript:ENSGMOT00000002422 gene_biotype:protein_coding transcript_biotype:protein_coding	357231	430348	474512	466204	370267	512310	550334	408449	423689	501062	554665	459538	603084	516436	549963	498907	537809	609807	558327	495032	377821	419133	388197	466326	301878	710917	494039	604857
ENSGMOP00000001951	2	2	300	0.123817	1.22448	0,5	2	pep:known_by_projection genescaffold:gadMor1:GeneScaffold_2768:22:19838:-1 gene:ENSGMOG00000001832 transcript:ENSGMOT00000002014 gene_biotype:protein_coding transcript_biotype:protein_coding	237005	182771	116183	156308	169108	133690	144047	147387	203584	139837	114872	109292	157052	230777	158724	133843	101079	124014	115562	122784	198323	217675	183684	201298	172236	122022	140126	166592
ENSGMOP00000021402	2	1	298.384	0.46781	1.33665	Kontrol	2	pep:known contig::contig345057:943:1392:1 gene:ENSGMOG00000019914 transcript:ENSGMOT00000021920 gene_biotype:protein_coding transcript_biotype:protein_coding	38617.2	44720.4	167452	63871.5	67822.5	55644.6	30200.4	41610.6	49252.6	19438	72671	39585.2	36300.8	37648.2	47415.3	37441.2	42626.6	18452.5	57466	97342.7	90805.4	73036.1	31832.6	41843.4	55471.6	57402.3	41759.4	30807.5
ENSGMOP00000007224	10	10	1599.78	0.795343	1.06046	2	Kontrol	pep:known_by_projection genescaffold:gadMor1:GeneScaffold_1770:284477:293982:1 gene:ENSGMOG00000006781 transcript:ENSGMOT00000007428 gene_biotype:protein_coding transcript_biotype:protein_coding	4.28905e+06	4.99372e+06	5.56348e+06	5.18558e+06	5.5842e+06	5.75122e+06	7.03661e+06	5.73955e+06	5.15213e+06	4.93099e+06	5.42685e+06	8.27098e+06	4.81157e+06	4.53725e+06	5.70076e+06	5.29365e+06	6.77784e+06	5.6877e+06	5.24789e+06	6.36318e+06	4.7301e+06	5.56092e+06	5.95401e+06	5.38401e+06	4.28237e+06	7.74069e+06	5.78331e+06	4.73904e+06
ENSGMOP00000007017	4	4	398.871	0.917872	1.02316	0,5	2	pep:known_by_projection genescaffold:gadMor1:GeneScaffold_2496:172232:188740:-1 gene:ENSGMOG00000006606 transcript:ENSGMOT00000007219 gene_biotype:protein_coding transcript_biotype:protein_coding	375087	379020	401259	394173	436627	315931	422647	443021	305323	220588	348948	427548	298006	375501	424966	375044	428966	275180	348030	323247	392776	425132	304950	363095	359624	417422	373237	419174
ENSGMOP00000008987	1	1	100	0.528276	1.22629	2	0,5	pep:known_by_projection genescaffold:gadMor1:GeneScaffold_3804:77479:87475:-1 gene:ENSGMOG00000008399 transcript:ENSGMOT00000009233 gene_biotype:protein_coding transcript_biotype:protein_coding	439730	262422	189712	199017	311792	181898	123477	288619	172890	124777	227508	108688	234163	515948	359237	191177	199660	361464	283199	95965.4	276870	107968	231249	350095	327430	164721	379788	89128.3
[truncated: 360 more rows]
