# Supplementary material for: Quantitative analyses of the hepatic proteome of methylmercury-exposed Atlantic cod (Gadus morhua) suggest oxidative stress-mediated effects on cellular energy metabolism
Source: BMC Genomics. 2016 Aug 5;17:554. doi: 10.1186/s12864-016-2864-2 (PMC4974784; doi:10.1186/s12864-016-2864-2)
Supplement: Additional file 4: Table S3. — Full list of significantly enriched top 50 GO BP and MF and all significant MetaCore processes network terms and the associated proteins. (XLSX 73 kb) [file 12864_2016_2864_MOESM4_ESM.xlsx]

## Sheet: Table S3 
Table S3 - Significantly enriched gene ontology biological process, molecular function and MetaCore process petworks annotations
#	Processes	Total	pValue	Min FDR	p-value	FDR	In Data	Network Objects from Active Data
1	small molecule metabolic process	2731	6.14905e-15	2.04948e-11	6.14905e-15	2.04948e-11	56	Glutaredoxin, CISY, G3P2, APOB, PI4Kbeta, GYS1, 3HAO, LDL, GSTO1, APOC1, Carbonic anhydrase II, FTHC, ACLY, PSMC4, GUCY1A2, DCUP, Peroxiredoxin, PLA2G4C, DCI, MAT2A, Large LDL, Small LDL, PLA2, APOE, PAPSS1, GLNA, SCOT, Txl, Nascent chylomicrons, DAAO, IDH2, TDO2, SYTC, 5830406J20Rik, GSTT2, APOA4, SEC23A, Guanylate cyclase, PI4-kinase, cPLA2, MANA, DHSO, ACDS, ACY3, Sec23, Guanylate cyclase alph…
2	response to inorganic substance	837	4.97476e-13	4.83993e-10	4.97476e-13	4.83993e-10	29	Glutaredoxin, ADPRHL2, Holotransferrin, APOB, 3HAO, LDL, Carbonic anhydrase II, DCUP, Peroxiredoxin, Large LDL, Small LDL, PLA2, Actin muscle, Mn(III)-Apotransferrin, Nascent chylomicrons, Pyrin (MEFV), PRDX2, NDRG1, APOA4, cPLA2, DHSO, Fibrinogen alpha, Apotransferrin, Actin, Transferrin, Beta-2 transferrin, GSTT1, Beta-catenin, Chylomicron remnant
3	macromolecular complex remodeling	47	7.26062e-13	4.83993e-10	7.26062e-13	4.83993e-10	10	APOB, LDL, APOC1, Large LDL, Small LDL, PLA2, APOE, Nascent chylomicrons, APOA4, Chylomicron remnant
4	plasma lipoprotein particle remodeling	47	7.26062e-13	4.83993e-10	7.26062e-13	4.83993e-10	10	APOB, LDL, APOC1, Large LDL, Small LDL, PLA2, APOE, Nascent chylomicrons, APOA4, Chylomicron remnant
5	protein-lipid complex remodeling	47	7.26062e-13	4.83993e-10	7.26062e-13	4.83993e-10	10	APOB, LDL, APOC1, Large LDL, Small LDL, PLA2, APOE, Nascent chylomicrons, APOA4, Chylomicron remnant
6	cholesterol efflux	52	2.15437e-12	1.12415e-09	2.15437e-12	1.12415e-09	10	APOB, LDL, APOC1, Large LDL, Small LDL, APOE, Nascent chylomicrons, APOA4, ABCA13, Chylomicron remnant
7	glycerolipid catabolic process	72	2.36096e-12	1.12415e-09	2.36096e-12	1.12415e-09	11	APOB, LDL, PLA2G4C, Large LDL, Small LDL, PLA2, APOE, Nascent chylomicrons, APOA4, cPLA2, Chylomicron remnant
8	single-organism metabolic process	5400	4.99678e-12	1.93115e-09	4.99678e-12	1.93115e-09	76	Glutaredoxin, CISY, ALDH16A1, G3P2, Holotransferrin, APOB, eIF5A, PI4Kbeta, Histone H2, GYS1, 3HAO, LDL, CRYM, Histone H2A, GSTO1, RBM30, APOC1, Carbonic anhydrase II, FTHC, ACLY, PSMC4, GUCY1A2, DHR11, DCUP, Peroxiredoxin, PLA2G4C, DCI, MAT2A, Large LDL, Small LDL, PLA2, APOE, PAPSS1, GLNA, SCOT, Mn(III)-Apotransferrin, Txl, Nascent chylomicrons, DAAO, IDH2, TDO2, SNX1, PRDX2, SYTC, 5830406J20Ri…
9	metabolic process	11901	5.21461e-12	1.93115e-09	5.21461e-12	1.93115e-09	121	MSP, GCN1L1, C11orf54, NACA, Glutaredoxin, CISY, ADPRHL2, ALDH16A1, G3P2, Holotransferrin, APOB, RPS10, eIF5A, PI4Kbeta, Histone H2, RAP-1B, GYS1, 3HAO, ACTC, LDL, CRYM, Histone H2A, GSTO1, RBM30, CES2, APOC1, Carbonic anhydrase II, ERp44, eIF4G1/3, FTHC, NT5DC2, ACLY, PSMC4, GUCY1A2, DHR11, DCUP, Peroxiredoxin, PLA2G4C, DCI, MAT2A, eIF5B (IF-2), Tubulin beta, Beta-fodrin, RPL36, Large LDL, GMF, …
10	plasma lipoprotein particle organization	58	6.8609e-12	2.28674e-09	6.8609e-12	2.28674e-09	10	APOB, LDL, APOC1, Large LDL, Small LDL, PLA2, APOE, Nascent chylomicrons, APOA4, Chylomicron remnant
11	plasma lipoprotein particle assembly	41	7.83451e-12	2.37386e-09	7.83451e-12	2.37386e-09	9	APOB, LDL, APOC1, Large LDL, Small LDL, APOE, Nascent chylomicrons, APOA4, Chylomicron remnant
12	protein-lipid complex subunit organization	61	1.1651e-11	3.23606e-09	1.1651e-11	3.23606e-09	10	APOB, LDL, APOC1, Large LDL, Small LDL, PLA2, APOE, Nascent chylomicrons, APOA4, Chylomicron remnant
13	protein-lipid complex assembly	44	1.55786e-11	3.99412e-09	1.55786e-11	3.99412e-09	9	APOB, LDL, APOC1, Large LDL, Small LDL, APOE, Nascent chylomicrons, APOA4, Chylomicron remnant
14	response to hormone	1568	1.94114e-11	4.62129e-09	1.94114e-11	4.62129e-09	37	Glutaredoxin, Holotransferrin, APOB, Histone H2, RAP-1B, LDL, CRYM, Histone H2A, Carbonic anhydrase II, eIF4G1/3, DCUP, MAT2A, Large LDL, Small LDL, PLA2, APOE, Actin muscle, SCOT, Mn(III)-Apotransferrin, Nascent chylomicrons, EBBP, eIF4B, cPLA2, DHSO, ACDS, Fibrinogen alpha, eIF4G1, Apotransferrin, GLUT2, Actin, Transferrin, Alpha-catenin, Beta-2 transferrin, Beta-catenin, Glutaredoxin 1, Chylom…
15	low-density lipoprotein particle remodeling	32	3.79035e-11	8.42216e-09	3.79035e-11	8.42216e-09	8	APOB, LDL, Large LDL, Small LDL, PLA2, APOE, Nascent chylomicrons, Chylomicron remnant
16	regulation of plasma lipoprotein particle levels	70	4.86281e-11	1.01298e-08	4.86281e-11	1.01298e-08	10	APOB, LDL, APOC1, Large LDL, Small LDL, PLA2, APOE, Nascent chylomicrons, APOA4, Chylomicron remnant
17	response to oxygen-containing compound	2287	1.24909e-10	2.44894e-08	1.24909e-10	2.44894e-08	44	Glutaredoxin, ADPRHL2, Holotransferrin, APOB, Histone H2, RAP-1B, ACTC, LDL, CRYM, Histone H2A, eIF4G1/3, DCUP, Peroxiredoxin, MAT2A, Large LDL, Small LDL, PLA2, APOE, Actin muscle, GLNA, SCOT, Mn(III)-Apotransferrin, Nascent chylomicrons, Pyrin (MEFV), PRDX2, GSTT2, APOA4, EBBP, eIF4B, cPLA2, Fibrinogen alpha, eIF4G1, Apotransferrin, GLUT2, Actin, Transferrin, Alpha-catenin, Beta-2 transferrin, …
18	cholesterol transport	80	1.9037e-10	3.30573e-08	1.9037e-10	3.30573e-08	10	APOB, LDL, APOC1, Large LDL, Small LDL, APOE, Nascent chylomicrons, APOA4, ABCA13, Chylomicron remnant
19	sterol transport	80	1.9037e-10	3.30573e-08	1.9037e-10	3.30573e-08	10	APOB, LDL, APOC1, Large LDL, Small LDL, APOE, Nascent chylomicrons, APOA4, ABCA13, Chylomicron remnant
20	lipoprotein catabolic process	24	1.98364e-10	3.30573e-08	1.98364e-10	3.30573e-08	7	APOB, LDL, Large LDL, Small LDL, APOE, Nascent chylomicrons, Chylomicron remnant
21	plasma lipoprotein particle clearance	42	4.01382e-10	6.37051e-08	4.01382e-10	6.37051e-08	8	APOB, LDL, APOC1, Large LDL, Small LDL, APOE, Nascent chylomicrons, Chylomicron remnant
22	cellular catabolic process	1749	4.36129e-10	6.60736e-08	4.36129e-10	6.60736e-08	37	APOB, RPS10, 3HAO, LDL, GSTO1, eIF4G1/3, PSMC4, Peroxiredoxin, PLA2G4C, DCI, RPL36, Large LDL, Small LDL, PLA2, APOE, Cathepsin Z, GLNA, SCOT, Nascent chylomicrons, DAAO, DDX48, Aminopeptidase P1, RPL19, TDO2, KHSRP, PRDX2, 5830406J20Rik, LYG2, USP9X, APOA4, eIF4B, cPLA2, DHSO, ACDS, eIF4G1, FLRE, Chylomicron remnant
23	regulation of body fluid levels	903	5.30855e-10	7.69277e-08	5.30855e-10	7.69277e-08	26	Annexin II, Holotransferrin, APOB, RAP-1B, LDL, GUCY1A2, Large LDL, Small LDL, PLA2, Mn(III)-Apotransferrin, Nascent chylomicrons, ATP1B1, COPA, Keratin 16, Guanylate cyclase, HC II, cPLA2, Fibrinogen alpha, Apotransferrin, Guanylate cyclase alpha, HXK2, Actin, Filamin A, Transferrin, Beta-2 transferrin, Chylomicron remnant
24	very-low-density lipoprotein particle assembly	28	6.63195e-10	9.21012e-08	6.63195e-10	9.21012e-08	7	APOB, LDL, APOC1, Large LDL, Small LDL, Nascent chylomicrons, Chylomicron remnant
25	catabolic process	2134	6.97373e-10	9.29737e-08	6.97373e-10	9.29737e-08	41	G3P2, APOB, RPS10, 3HAO, LDL, GSTO1, CES2, eIF4G1/3, PSMC4, Peroxiredoxin, PLA2G4C, DCI, RPL36, Large LDL, Small LDL, PLA2, APOE, Cathepsin Z, GLNA, SCOT, Nascent chylomicrons, DAAO, DDX48, Aminopeptidase P1, RPL19, TDO2, KHSRP, PRDX2, 5830406J20Rik, LYG2, USP9X, APOA4, eIF4B, cPLA2, DHSO, ACDS, eIF4G1, FLRE, HXK2, ASPG, Chylomicron remnant
26	positive regulation of oligodendrocyte progenitor proliferation	8	7.93313e-10	9.79731e-08	7.93313e-10	9.79731e-08	5	Holotransferrin, Mn(III)-Apotransferrin, Apotransferrin, Transferrin, Beta-2 transferrin
27	response to wounding	1064	7.93661e-10	9.79731e-08	7.93661e-10	9.79731e-08	28	NACA, Holotransferrin, APOB, RAP-1B, LDL, GUCY1A2, Large LDL, Small LDL, PLA2, APOE, CLEC10A, Mn(III)-Apotransferrin, Nascent chylomicrons, ATP1B1, APOA4, Guanylate cyclase, HC II, cPLA2, Fibrinogen alpha, Apotransferrin, Guanylate cyclase alpha, Actin, Filamin A, Transferrin, Alpha-catenin, Beta-2 transferrin, Chylomicron remnant, Alpha-1 catenin
28	cellular metabolic process	10000	9.69298e-10	1.15381e-07	9.69298e-10	1.15381e-07	105	GCN1L1, NACA, Glutaredoxin, CISY, G3P2, Holotransferrin, APOB, RPS10, eIF5A, PI4Kbeta, Histone H2, GYS1, 3HAO, LDL, CRYM, Histone H2A, GSTO1, RBM30, APOC1, Carbonic anhydrase II, ERp44, eIF4G1/3, FTHC, NT5DC2, ACLY, PSMC4, GUCY1A2, DCUP, Peroxiredoxin, PLA2G4C, DCI, MAT2A, eIF5B (IF-2), Tubulin beta, Beta-fodrin, RPL36, Large LDL, GMF, Small LDL, PLA2, NHP2-like protein 1, APOE, Cathepsin Z, U5-2…
29	organic substance catabolic process	1821	1.33422e-09	1.53343e-07	1.33422e-09	1.53343e-07	37	G3P2, APOB, RPS10, 3HAO, LDL, eIF4G1/3, PSMC4, PLA2G4C, DCI, RPL36, Large LDL, Small LDL, PLA2, APOE, Cathepsin Z, GLNA, SCOT, Nascent chylomicrons, DAAO, DDX48, Aminopeptidase P1, RPL19, TDO2, KHSRP, 5830406J20Rik, LYG2, USP9X, APOA4, eIF4B, cPLA2, DHSO, ACDS, eIF4G1, FLRE, HXK2, ASPG, Chylomicron remnant
30	positive regulation of macrophage derived foam cell differentiation	33	2.32508e-09	2.42281e-07	2.32508e-09	2.42281e-07	7	APOB, LDL, Large LDL, Small LDL, PLA2, Nascent chylomicrons, Chylomicron remnant
31	coagulation	694	2.32613e-09	2.42281e-07	2.32613e-09	2.42281e-07	22	Holotransferrin, APOB, RAP-1B, LDL, GUCY1A2, Large LDL, Small LDL, PLA2, Mn(III)-Apotransferrin, Nascent chylomicrons, ATP1B1, Guanylate cyclase, HC II, cPLA2, Fibrinogen alpha, Apotransferrin, Guanylate cyclase alpha, Actin, Filamin A, Transferrin, Beta-2 transferrin, Chylomicron remnant
32	blood coagulation	694	2.32613e-09	2.42281e-07	2.32613e-09	2.42281e-07	22	Holotransferrin, APOB, RAP-1B, LDL, GUCY1A2, Large LDL, Small LDL, PLA2, Mn(III)-Apotransferrin, Nascent chylomicrons, ATP1B1, Guanylate cyclase, HC II, cPLA2, Fibrinogen alpha, Apotransferrin, Guanylate cyclase alpha, Actin, Filamin A, Transferrin, Beta-2 transferrin, Chylomicron remnant
33	response to alcohol	696	2.45228e-09	2.4768e-07	2.45228e-09	2.4768e-07	22	Glutaredoxin, Histone H2, ACTC, CRYM, Histone H2A, eIF4G1/3, DCUP, Large LDL, PLA2, APOE, Actin muscle, SCOT, cPLA2, Fibrinogen alpha, eIF4G1, Actin, Alpha-catenin, SPTBN(spectrin1-4), Beta-catenin, Glutaredoxin 1, Chylomicron remnant, Alpha-1 catenin
34	cellular lipid catabolic process	212	2.70369e-09	2.59397e-07	2.70369e-09	2.59397e-07	13	APOB, LDL, PLA2G4C, DCI, Large LDL, Small LDL, PLA2, APOE, Nascent chylomicrons, APOA4, cPLA2, ACDS, Chylomicron remnant
35	hemostasis	700	2.72394e-09	2.59397e-07	2.72394e-09	2.59397e-07	22	Holotransferrin, APOB, RAP-1B, LDL, GUCY1A2, Large LDL, Small LDL, PLA2, Mn(III)-Apotransferrin, Nascent chylomicrons, ATP1B1, Guanylate cyclase, HC II, cPLA2, Fibrinogen alpha, Apotransferrin, Guanylate cyclase alpha, Actin, Filamin A, Transferrin, Beta-2 transferrin, Chylomicron remnant
36	cellular response to superoxide	20	3.42796e-09	3.00668e-07	3.42796e-09	3.00668e-07	6	Glutaredoxin, ADPRHL2, Peroxiredoxin, Nascent chylomicrons, PRDX2, APOA4
37	cellular response to oxygen radical	20	3.42796e-09	3.00668e-07	3.42796e-09	3.00668e-07	6	Glutaredoxin, ADPRHL2, Peroxiredoxin, Nascent chylomicrons, PRDX2, APOA4
38	positive regulation of cholesterol storage	20	3.42796e-09	3.00668e-07	3.42796e-09	3.00668e-07	6	APOB, LDL, Large LDL, Small LDL, Nascent chylomicrons, Chylomicron remnant
39	triglyceride catabolic process	55	3.84017e-09	3.28187e-07	3.84017e-09	3.28187e-07	8	APOB, LDL, Large LDL, Small LDL, APOE, Nascent chylomicrons, APOA4, Chylomicron remnant
40	phospholipid efflux	36	4.46566e-09	3.72101e-07	4.46566e-09	3.72101e-07	7	APOC1, Large LDL, APOE, Nascent chylomicrons, APOA4, ABCA13, Chylomicron remnant
41	osteoclast differentiation	57	5.15165e-09	4.18791e-07	5.15165e-09	4.18791e-07	8	Annexin II, Holotransferrin, Carbonic anhydrase II, Mn(III)-Apotransferrin, Apotransferrin, Transferrin, Beta-2 transferrin, Beta-catenin
42	regulation of cholesterol biosynthetic process	37	5.47611e-09	4.24462e-07	5.47611e-09	4.24462e-07	7	APOB, LDL, Large LDL, Small LDL, APOE, Nascent chylomicrons, Chylomicron remnant
43	positive regulation of lipid storage	37	5.47611e-09	4.24462e-07	5.47611e-09	4.24462e-07	7	APOB, LDL, Large LDL, Small LDL, PLA2, Nascent chylomicrons, Chylomicron remnant
44	response to stress	4624	5.80162e-09	4.3438e-07	5.80162e-09	4.3438e-07	63	NACA, Glutaredoxin, ADPRHL2, G3P2, Holotransferrin, APOB, Histone H2, RAP-1B, LDL, Histone H2A, RBM30, Carbonic anhydrase II, ERp44, eIF4G1/3, PSMC4, GUCY1A2, Peroxiredoxin, PLA2G4C, Tubulin beta, Large LDL, Small LDL, PLA2, Vitronectin, APOE, CLEC10A, GLNA, SCOT, Mn(III)-Apotransferrin, ARP2, Txl, Nascent chylomicrons, Pyrin (MEFV), ATP1B1, Keratin 16, PRDX2, NDRG1, 5830406J20Rik, APOA4, Guanyla…
45	response to organic substance	3834	5.86472e-09	4.3438e-07	5.86472e-09	4.3438e-07	56	Glutaredoxin, G3P2, Holotransferrin, APOB, Histone H2, RAP-1B, ACTC, LDL, CRYM, Histone H2A, CES2, Carbonic anhydrase II, ERp44, eIF4G1/3, PSMC4, DCUP, Peroxiredoxin, MAT2A, Large LDL, Small LDL, PLA2, APOE, Actin muscle, GLNA, SCOT, Mn(III)-Apotransferrin, Nascent chylomicrons, Pyrin (MEFV), DDX48, PRDX2, GSTT2, USP9X, APOA4, Guanylate cyclase, EBBP, eIF4B, Rab-35, cPLA2, DHSO, ACDS, Fibrinogen …
46	response to superoxide	23	8.77732e-09	6.22905e-07	8.77732e-09	6.22905e-07	6	Glutaredoxin, ADPRHL2, Peroxiredoxin, Nascent chylomicrons, PRDX2, APOA4
47	neutral lipid catabolic process	61	8.97073e-09	6.22905e-07	8.97073e-09	6.22905e-07	8	APOB, LDL, Large LDL, Small LDL, APOE, Nascent chylomicrons, APOA4, Chylomicron remnant
48	acylglycerol catabolic process	61	8.97073e-09	6.22905e-07	8.97073e-09	6.22905e-07	8	APOB, LDL, Large LDL, Small LDL, APOE, Nascent chylomicrons, APOA4, Chylomicron remnant
49	organic substance transport	2337	1.0113e-08	6.85268e-07	1.0113e-08	6.85268e-07	41	Annexin II, NACA, Holotransferrin, APOB, RPS10, eIF5A, LDL, CRYM, APOC1, Carbonic anhydrase II, Beta-fodrin, RPL36, Large LDL, Small LDL, PLA2, APOE, Mn(III)-Apotransferrin, COPB, Nascent chylomicrons, NECAP1, ATP1B1, COPA, DDX48, RPL19, SNX1, KHSRP, APOA4, SEC23A, MVP, Rab-35, cPLA2, Apotransferrin, CD36L2, Sec23, ABCA13, GLUT2, HXK2, Transferrin, Beta-2 transferrin, SPTBN(spectrin1-4), Chylomic…
50	vesicle-mediated transport	1523	1.028e-08	6.85268e-07	1.028e-08	6.85268e-07	32	Annexin II, Holotransferrin, APOB, PI4Kbeta, LDL, Beta-fodrin, Large LDL, Small LDL, PLA2, Vitronectin, APOE, CLEC10A, Mn(III)-Apotransferrin, COPB, ARP2, Nascent chylomicrons, NECAP1, COPA, SNX1, SEC23A, PI4-kinase, Rab-35, Fibrinogen alpha, Apotransferrin, Sec23, Actin, Filamin A, Transferrin, Beta-2 transferrin, SPTBN(spectrin1-4), Beta-catenin, Chylomicron remnant
#	Molecular functions	Total	pValue	Min FDR	p-value	FDR	In Data	Network Objects from Active Data
1	oxidoreductase activity	886	1.41279e-06	0.000765367	1.41279e-06	0.000765367	19	ALDH16A1, G3P2, 3HAO, CRYM, GSTO1, DHR11, Txl, DAAO, IDH2, TDO2, PRDX2, GSTT2, DHSO, ACDS, VAT-1, FLRE, PECR, GSTT1, Glutaredoxin 1
2	catalytic activity	6434	3.84846e-06	0.000765367	3.84846e-06	0.000765367	63	MSP, C11orf54, CISY, ADPRHL2, ALDH16A1, G3P2, PI4Kbeta, RAP-1B, GYS1, 3HAO, ACTC, CRYM, GSTO1, CES2, Carbonic anhydrase II, ERp44, FTHC, NT5DC2, ACLY, PSMC4, GUCY1A2, DHR11, DCUP, PLA2G4C, DCI, MAT2A, eIF5B (IF-2), Cathepsin Z, U5-200KD, PAPSS1, GLNA, SCOT, Txl, DAAO, ATP1B1, DDX48, Aminopeptidase P1, IDH2, TDO2, PRDX2, SYTC, 5830406J20Rik, LYG2, GSTT2, USP9X, Rab-35, MANA, DHSO, ACDS, VAT-1, ACY…
3	phosphatidylcholine-sterol O-acyltransferase activator activity	6	4.18611e-06	0.000765367	4.18611e-06	0.000765367	3	APOC1, APOE, APOA4
4	small molecule binding	2957	6.64333e-06	0.000765367	6.64333e-06	0.000765367	37	G3P2, PI4Kbeta, RAP-1B, ACTC, CRYM, RBM30, APOC1, FTHC, ACLY, PSMC4, GUCY1A2, MAT2A, eIF5B (IF-2), APOE, U5-200KD, PAPSS1, GLNA, ARP2, DAAO, DRG1, DDX48, IDH2, TDO2, CPSF6, SYTC, APOA4, eIF4B, Rab-35, DHSO, ACDS, Pin1, ABCA13, HSP90AB3P, FLRE, HXK2, Transferrin, Tubulin beta 2C
5	cholesterol transporter activity	21	6.87971e-06	0.000765367	6.87971e-06	0.000765367	4	APOB, APOE, APOA4, ABCA13
6	sterol transporter activity	22	8.3695e-06	0.000765367	8.3695e-06	0.000765367	4	APOB, APOE, APOA4, ABCA13
7	antioxidant activity	81	9.38279e-06	0.000765367	9.38279e-06	0.000765367	6	GSTO1, APOE, PRDX2, GSTT2, APOA4, GSTT1
8	poly(A) RNA binding	1289	2.66015e-05	0.00189868	2.66015e-05	0.00189868	21	GCN1L1, Annexin II, CISY, RPS10, eIF5A, RBM30, eIF5B (IF-2), Beta-fodrin, RPL36, NHP2-like protein 1, U5-200KD, DDX48, RPL19, KHSRP, CPSF6, eIF4B, API5, eIF4G1, Filamin A, SNRPD1 (SMD1), Alpha-1 catenin
9	anion binding	3074	4.02718e-05	0.00255502	4.02718e-05	0.00255502	36	Annexin II, APOB, PI4Kbeta, RAP-1B, ACTC, APOC1, FTHC, ACLY, PSMC4, GUCY1A2, PLA2G4C, MAT2A, eIF5B (IF-2), Beta-fodrin, Vitronectin, APOE, U5-200KD, PAPSS1, GLNA, ARP2, DAAO, DRG1, DDX48, TDO2, SNX1, SYTC, APOA4, HC II, Rab-35, ACDS, Pin1, ABCA13, HSP90AB3P, HXK2, Transferrin, Tubulin beta 2C
10	nucleotide binding	2605	5.01183e-05	0.00262123	5.01183e-05	0.00262123	32	G3P2, PI4Kbeta, RAP-1B, ACTC, CRYM, RBM30, FTHC, ACLY, PSMC4, GUCY1A2, MAT2A, eIF5B (IF-2), U5-200KD, PAPSS1, GLNA, ARP2, DAAO, DRG1, DDX48, IDH2, CPSF6, SYTC, eIF4B, Rab-35, DHSO, ACDS, ABCA13, HSP90AB3P, FLRE, HXK2, Transferrin, Tubulin beta 2C
11	nucleoside phosphate binding	2606	5.04966e-05	0.00262123	5.04966e-05	0.00262123	32	G3P2, PI4Kbeta, RAP-1B, ACTC, CRYM, RBM30, FTHC, ACLY, PSMC4, GUCY1A2, MAT2A, eIF5B (IF-2), U5-200KD, PAPSS1, GLNA, ARP2, DAAO, DRG1, DDX48, IDH2, CPSF6, SYTC, eIF4B, Rab-35, DHSO, ACDS, ABCA13, HSP90AB3P, FLRE, HXK2, Transferrin, Tubulin beta 2C
12	actin filament binding	140	0.000203358	0.00937503	0.000203358	0.00937503	6	Annexin II, Filamin-A (CTF), EPS8L2, ARP2, Filamin A, Alpha-1 catenin
13	Fc-gamma receptor I complex binding	4	0.000213442	0.00937503	0.000213442	0.00937503	2	Filamin-A (CTF), Filamin A
14	actin binding	435	0.000301356	0.012087	0.000301356	0.012087	10	Annexin II, Filamin-A (CTF), FMNL3, Beta-fodrin, GMF, EPS8L2, ARP2, Pyrin (MEFV), Filamin A, Alpha-1 catenin
15	protein binding	12224	0.00032514	0.012087	0.00032514	0.012087	92	GCN1L1, C11orf54, Annexin II, NACA, G3P2, APOB, RPS10, eIF5A, PI4Kbeta, RAP-1B, GYS1, 3HAO, ACTC, CRYM, GSTO1, RBM30, OCM2, Filamin-A (CTF), Carbonic anhydrase II, ERp44, FMNL3, ACLY, PSMC4, GUCY1A2, DCUP, DCI, MAT2A, eIF5B (IF-2), Beta-fodrin, LRRC8C, GMF, NHP2-like protein 1, Vitronectin, EPS8L2, APOE, Barttin, Cathepsin Z, U5-200KD, GLNA, SCOT, COPB, SHBG, ARP2, BCRP1, NECAP1, DAAO, Pyrin (MEF…
16	glutathione disulfide oxidoreductase activity	5	0.000354335	0.012087	0.000354335	0.012087	2	GSTO1, Glutaredoxin 1
17	cytoskeletal protein binding	907	0.000359857	0.012087	0.000359857	0.012087	15	Annexin II, G3P2, ACTC, Filamin-A (CTF), FMNL3, Beta-fodrin, GMF, EPS8L2, APOE, ARP2, Pyrin (MEFV), NDRG1, CRMP5, Filamin A, Alpha-1 catenin
18	translation factor activity, RNA binding	104	0.000414104	0.0131363	0.000414104	0.0131363	5	GCN1L1, eIF5A, eIF5B (IF-2), eIF4B, eIF4G1
19	protein complex binding	1140	0.000474437	0.0142581	0.000474437	0.0142581	17	Annexin II, G3P2, RAP-1B, Filamin-A (CTF), Beta-fodrin, GMF, Vitronectin, EPS8L2, ARP2, ATP1B1, SNX1, NDRG1, CRMP5, GLUT2, Filamin A, Beta-catenin, Alpha-1 catenin
20	mu-type opioid receptor binding	6	0.00052941	0.0151146	0.00052941	0.0151146	2	Filamin-A (CTF), Filamin A
21	intramolecular oxidoreductase activity	65	0.000634629	0.0162132	0.000634629	0.0162132	4	ERp44, DCI, MANA, RPIA
22	transferase activity, transferring alkyl or aryl (other than methyl) groups	65	0.000634629	0.0162132	0.000634629	0.0162132	4	GSTO1, MAT2A, GSTT2, GSTT1
23	amino acid binding	115	0.000655794	0.0162132	0.000655794	0.0162132	5	FTHC, MAT2A, GLNA, TDO2, Pin1
24	carbohydrate derivative binding	2484	0.000690957	0.0162132	0.000690957	0.0162132	28	APOB, PI4Kbeta, RAP-1B, ACTC, Filamin-A (CTF), FTHC, ACLY, PSMC4, GUCY1A2, MAT2A, eIF5B (IF-2), Vitronectin, APOE, U5-200KD, PAPSS1, GLNA, ARP2, DRG1, DDX48, SYTC, HC II, Rab-35, ABCA13, HSP90AB3P, HXK2, Filamin A, Transferrin, Tubulin beta 2C
25	peptide disulfide oxidoreductase activity	7	0.000738256	0.0162132	0.000738256	0.0162132	2	GSTO1, Glutaredoxin 1
26	transferase activity, transferring acyl groups, acyl groups converted into alkyl on transfer	7	0.000738256	0.0162132	0.000738256	0.0162132	2	CISY, ACLY
27	RNA binding	1776	0.000856678	0.0181171	0.000856678	0.0181171	22	GCN1L1, Annexin II, CISY, RPS10, eIF5A, RBM30, eIF5B (IF-2), Beta-fodrin, RPL36, NHP2-like protein 1, U5-200KD, DDX48, RPL19, KHSRP, CPSF6, eIF4B, API5, eIF4G1, Filamin A, Tubulin beta 2C, SNRPD1 (SMD1), Alpha-1 catenin
28	opioid receptor binding	8	0.000980469	0.0199711	0.000980469	0.0199711	2	Filamin-A (CTF), Filamin A
29	glutathione transferase activity	33	0.00101429	0.0199711	0.00101429	0.0199711	3	GSTO1, GSTT2, GSTT1
30	cadherin binding	34	0.00110759	0.0204011	0.00110759	0.0204011	3	NDRG1, Beta-catenin, Alpha-1 catenin
31	disulfide oxidoreductase activity	34	0.00110759	0.0204011	0.00110759	0.0204011	3	GSTO1, Txl, Glutaredoxin 1
32	organic cyclic compound binding	6734	0.00129773	0.0231565	0.00129773	0.0231565	57	GCN1L1, Annexin II, NACA, CISY, G3P2, RPS10, eIF5A, PI4Kbeta, RAP-1B, ACTC, CRYM, RBM30, FTHC, ACLY, PSMC4, GUCY1A2, MAT2A, eIF5B (IF-2), Beta-fodrin, RPL36, NHP2-like protein 1, APOE, U5-200KD, PAPSS1, GLNA, SHBG, ARP2, BCRP1, DAAO, DRG1, DDX48, RPL19, IDH2, TDO2, KHSRP, CPSF6, SYTC, APOA4, EBBP, eIF4B, Rab-35, DHSO, API5, ACDS, eIF4G1, HBZ, ABCA13, HSP90AB3P, FLRE, HXK2, Filamin A, Transferrin,…
33	SMAD binding	80	0.00138338	0.0239367	0.00138338	0.0239367	4	Filamin-A (CTF), USP9X, Filamin A, Beta-catenin
34	binding	16357	0.0016245	0.027282	0.0016245	0.027282	111	GCN1L1, C11orf54, Annexin II, NACA, CISY, ADPRHL2, G3P2, APOB, RPS10, eIF5A, PI4Kbeta, RAP-1B, GYS1, 3HAO, ACTC, CRYM, GSTO1, RBM30, OCM2, Filamin-A (CTF), APOC1, Carbonic anhydrase II, ERp44, FMNL3, FTHC, NT5DC2, ACLY, PSMC4, GUCY1A2, DCUP, PLA2G4C, DCI, MAT2A, eIF5B (IF-2), Beta-fodrin, LRRC8C, RPL36, Secretagogin, GMF, NHP2-like protein 1, Vitronectin, EPS8L2, APOE, Barttin, CLEC10A, Cathepsin…
35	identical protein binding	1397	0.00172733	0.0281801	0.00172733	0.0281801	18	G3P2, CRYM, OCM2, Filamin-A (CTF), DCI, Vitronectin, APOE, U5-200KD, GLNA, SCOT, DRG1, Aminopeptidase P1, SNX1, SYTC, APOA4, DHSO, ACY3, Filamin A
36	immunoglobulin receptor binding	11	0.0019033	0.0293725	0.0019033	0.0293725	2	Filamin-A (CTF), Filamin A
37	intramolecular oxidoreductase activity, interconverting aldoses and ketoses	11	0.0019033	0.0293725	0.0019033	0.0293725	2	MANA, RPIA
38	ion binding	6724	0.0022566	0.0333082	0.0022566	0.0333082	56	C11orf54, Annexin II, ADPRHL2, APOB, PI4Kbeta, RAP-1B, 3HAO, ACTC, RBM30, OCM2, APOC1, Carbonic anhydrase II, FTHC, NT5DC2, ACLY, PSMC4, GUCY1A2, DCUP, PLA2G4C, MAT2A, eIF5B (IF-2), Beta-fodrin, Secretagogin, Vitronectin, APOE, U5-200KD, PAPSS1, GLNA, ARP2, DAAO, Pyrin (MEFV), DRG1, DDX48, Aminopeptidase P1, IDH2, TDO2, SNX1, SYTC, APOA4, SEC23A, HC II, EBBP, Rab-35, MANA, DHSO, ACDS, VAT-1, ACY3…
39	glucose binding	12	0.00227499	0.0333082	0.00227499	0.0333082	2	GYS1, HXK2
40	coenzyme binding	232	0.00281436	0.0394602	0.00281436	0.0394602	6	G3P2, CRYM, DAAO, IDH2, DHSO, ACDS
41	phospholipid binding	491	0.0028896	0.0394602	0.0028896	0.0394602	9	Annexin II, APOB, APOC1, PLA2G4C, Beta-fodrin, APOE, SNX1, APOA4, Rab-35
42	peroxidase activity	48	0.00301153	0.0394602	0.00301153	0.0394602	3	PRDX2, GSTT2, GSTT1
43	Ral GTPase binding	14	0.00311216	0.0394602	0.00311216	0.0394602	2	Filamin-A (CTF), Filamin A
44	oxidoreductase activity, acting on peroxide as acceptor	49	0.00319399	0.0394602	0.00319399	0.0394602	3	PRDX2, GSTT2, GSTT1
45	purine ribonucleoside triphosphate binding	1983	0.00346376	0.0394602	0.00346376	0.0394602	22	PI4Kbeta, RAP-1B, ACTC, FTHC, ACLY, PSMC4, GUCY1A2, MAT2A, eIF5B (IF-2), U5-200KD, PAPSS1, GLNA, ARP2, DRG1, DDX48, SYTC, Rab-35, ABCA13, HSP90AB3P, HXK2, Transferrin, Tubulin beta 2C
46	cofactor binding	327	0.00365703	0.0394602	0.00365703	0.0394602	7	G3P2, CRYM, ACLY, DAAO, IDH2, DHSO, ACDS
47	carboxylic acid binding	245	0.00367864	0.0394602	0.00367864	0.0394602	6	APOC1, FTHC, MAT2A, GLNA, TDO2, Pin1
48	purine ribonucleoside binding	1999	0.00381654	0.0394602	0.00381654	0.0394602	22	PI4Kbeta, RAP-1B, ACTC, FTHC, ACLY, PSMC4, GUCY1A2, MAT2A, eIF5B (IF-2), U5-200KD, PAPSS1, GLNA, ARP2, DRG1, DDX48, SYTC, Rab-35, ABCA13, HSP90AB3P, HXK2, Transferrin, Tubulin beta 2C
49	purine nucleoside binding	2002	0.00388595	0.0394602	0.00388595	0.0394602	22	PI4Kbeta, RAP-1B, ACTC, FTHC, ACLY, PSMC4, GUCY1A2, MAT2A, eIF5B (IF-2), U5-200KD, PAPSS1, GLNA, ARP2, DRG1, DDX48, SYTC, Rab-35, ABCA13, HSP90AB3P, HXK2, Transferrin, Tubulin beta 2C
50	organic acid binding	248	0.00390336	0.0394602	0.00390336	0.0394602	6	APOC1, FTHC, MAT2A, GLNA, TDO2, Pin1
#	Networks	Total	pValue	Min FDR	p-value	FDR	In Data	Network Objects from Active Data
1	Translation_Translation initiation	171	0.000102143	0.01001	0.000102143	0.01001	9	RPS10, eIF5A, eIF4G1/3, eIF5B (IF-2), RPL36, NHP2-like protein 1, RPL19, eIF4B, eIF4G1
2	Response to hypoxia and oxidative stress	163	0.000407963	0.0199902	0.000407963	0.0199902	8	Glutaredoxin, G3P2, GSTO1, Peroxiredoxin, PRDX2, GSTT2, GSTT1, Glutaredoxin 1
3	Cytoskeleton_Actin filaments	176	0.000680412	0.0222268	0.000680412	0.0222268	8	Annexin II, ACTC, Beta-fodrin, Actin muscle, ARP2, Actin, Filamin A, SPTBN(spectrin1-4)
4	Cell adhesion_Cell junctions	162	0.00199726	0.0489329	0.00199726	0.0489329	7	Tubulin beta, Beta-fodrin, ATP1B1, Actin, Alpha-catenin, Beta-catenin, Alpha-1 catenin
