# Supplementary material for: Quantitative analyses of the hepatic proteome of methylmercury-exposed Atlantic cod (Gadus morhua) suggest oxidative stress-mediated effects on cellular energy metabolism
Source: BMC Genomics. 2016 Aug 5;17:554. doi: 10.1186/s12864-016-2864-2 (PMC4974784; doi:10.1186/s12864-016-2864-2)
Supplement: Additional file 5: Table S4. — Full list of significantly enriched KEGG, GO (BP, MF and CC) and Interpro protein domains from STRING network analysis. (XLS 50 kb) [file 12864_2016_2864_MOESM5_ESM.xls]

## Sheet: TableS4
Table S4. Full list of significantly enriched KEGG, GO (BP, MF and CC) and Interpro protein domains from STRING network analysis
ID	KEGG pathway	NumberOfProteins	p-value	p-value_fdr	p-value_bonferroni	Proteins
1100	Metabolic pathways	21	7.14E-6	2.05E-3	2.05E-3	MPI, TPH1, PI4KB, CS, UROD, SORD, ACADS, GBE1, HAAO, PECR, PAPSS1, HK2, TDO2, RPIA, IDH2, PLA2G4C, MAT2A, ACY3, ACLY, DAO, GAPDH
1200	Carbon metabolism	6	3.85E-5	5.52E-3	1.1E-2	RPIA, ACADS, IDH2, CS, HK2, GAPDH
1230	Biosynthesis of amino acids	5	6.92E-5	6.62E-3	1.99E-2	CS, RPIA, MAT2A, IDH2, GAPDH
480	Glutathione metabolism	4	2.28E-4	1.63E-2	6.53E-2	GSTT2B, GSTO1, IDH2, GSTT1
20	Citrate cycle (TCA cycle)	3	6.53E-4	3.75E-2	1.87E-1	ACLY, IDH2, CS
51	Fructose and mannose metabolism	3	9.71E-4	4.64E-2	2.79E-1	SORD, MPI, HK2
############################################################################################################################################################################################
GO_id	GO_ BP Term	NumberOfProteins	p-value	p-value_fdr	p-value_bonferroni	Proteins
GO:0044281	small molecule metabolic process	30	1.24E-7	1.67E-3	1.67E-3	GYS1, PI4KB, SORD, TARS, PSMB11, PAPSS1, BLVRB, ASPG, GSTO1, DPYSL5, PSMC4, GSTT2B, RPIA, APOA4, TXNL1, TRIB3, SLC2A2, GUCY1A2, APOC1, GSTT1, UROD, ACADS, GBE1, GLRX, APOB, SEC23A, PLA2G4C, MTHFS, ACY3, ACLY
GO:0033700	phospholipid efflux	4	9.1E-7	6.12E-3	1.22E-2	APOC1, ABCA13, APOA4, APOE
GO:0034377	plasma lipoprotein particle assembly	4	2.97E-6	1.33E-2	0.04	APOC1, APOB, APOA4, APOE
GO:0065005	protein-lipid complex assembly	4	4.8E-6	1.61E-2	6.45E-2	APOC1, APOB, APOA4, APOE
GO:0044248	cellular catabolic process	21	7.04E-6	1.89E-2	9.47E-2	USP9X, RPL36, APOE, EIF4A3, KHSRP, XPNPEP1, PRDX2, SORD, ACADS, HAAO, PSMB11, APOB, BLVRB, GSTO1, RPS10, DPYSL5, LYG2, PSMC4, EIF4B, APOA4, EIF4G1
GO:0033344	cholesterol efflux	4	1.08E-5	2.41E-2	1.45E-1	APOC1, ABCA13, APOB, APOA4
GO:0055114	oxidation-reduction process	17	1.79E-5	3.43E-2	2.4E-1	TPH1, DHRS11, GSTT1, PRDX2, SORD, VAT1, HAAO, GLRX, ALDH16A1, BLVRB, GSTO1, TDO2, CRYM, SLC2A2, ACLY, DAO, GAPDH
GO:1901564	organonitrogen compound metabolic process	19	2.69E-5	4.52E-2	3.62E-1	XPNPEP1, ITIH3, GSTT1, TARS, PAPSS1, BLVRB, ASPG, GSTO1, DPYSL5, LYG2, GSTT2B, RPIA, APOA4, PLA2G4C, CTSZ, CRYM, MTHFS, GUCY1A2, ACLY
GO:0071451	cellular response to superoxide	3	3.55E-5	4.77E-2	4.77E-1	PRDX2, APOA4, ADPRHL2
GO_id	GO_ MF Term	NumberOfGenes	p-value	p-value_fdr	p-value_bonferroni
GO:0036094	small molecule binding	33	2.73E-6	1.07E-2	1.07E-2	SNRNP200, PI4KB, SORD, TARS, PAPSS1, EIF5B, PSMC4, HK2, TDO2, APOA4, DRG1, TRIB3, CRYM, GUCY1A2, DAO, HSP90AB1, GAPDH, APOC1, APOE, TPH1, TUBB4B, PIN1, ACTR2, ACADS, ABCA13, EIF4B, RBM4B, IDH2, MAT2A, MTHFS, CPSF6, SDPR, ACLY
GO:0044822	poly(A) RNA binding	20	1.62E-5	3.19E-2	6.38E-2	RPL36, SNRNP200, EIF4A3, GCN1L1, CS, SNRPD1, SPTBN1, FLNA, ANXA2, RPS10, EIF5B, EIF4B, RBM4B, NHP2L1, CPSF6, LRRC59, API5, CTNNA1, EIF4G1, HSP90AB1
############################################################################################################################################################################################
GO_id	GO_CC Term	NumberOfProteins	p-value	p-value_fdr	p-value_bonferroni	Proteins
GO:0070062	extracellular exosome	59	2.44E-20	9.65E-18	3.86E-17	CES2, COPA, MPI, TF, ATP1B1, NDRG1, EPS8L2, SORD, SCARB2, TARS, FLNA, BLVRB, GSTO1, HEBP2, GSTT2B, APOA4, SERPIND1, MVP, TXNL1, CTSZ, CRYM, C11orf54, PLAA, VTN, HSP90AB1, GAPDH, APOC1, APOE, HBZ, CTNNB1, XPNPEP1, TUBB4B, ACTR2, ITIH3, GLOD4, GSTT1, PRDX2, KRT16, CS, VAT1, GBE1, HAAO, GLRX, MST1, SPTBN1, SHBG, ALDH16A1, APOB, TTC38, ANXA2, RAB35, RPS10, ERP44, FGA, IDH2, H2AFX, ECI1, ACY3, ACLY
GO:0031988	membrane-bounded vesicle	59	7.27E-17	2e-14	1.15E-13	CES2, MPI, TF, NDRG1, EPS8L2, HEBP2, SERPIND1, TXNL1, CTSZ, CRYM, PLAA, VTN, GAPDH, SCGN, ACTR2, GLOD4, PRDX2, KRT16, HAAO, SHBG, ALDH16A1, TTC38, FGA, H2AFX, ECI1, CTNNA1, COPA, ATP1B1, SORD, SCARB2, TARS, FLNA, BLVRB, GSTO1, GSTT2B, APOA4, MVP, C11orf54, APOC1, APOE, HBZ, CTNNB1, XPNPEP1, TUBB4B, ITIH3, NECAP1, GSTT1, CS, VAT1, GBE1, GLRX, MST1, SPTBN1, APOB, RPS10, ERP44, IDH2, ACY3, ACLY
GO:0005829	cytosol	55	7.58E-17	2e-14	1.2E-13	USP9X, EIF4A3, GYS1, COPA, KHSRP, MPI, NDRG1, SORD, PFDN4, TARS, PSMB11, PAPSS1, FLNA, BLVRB, SNX1, GSTO1, EIF5B, DPYSL5, PSMC4, GSTT2B, HK2, TDO2, RPIA, APOA4, TRIB3, MEFV, DAO, HSP90AB1, GAPDH, , , COPB1, TPH1, XPNPEP1, TUBB4B, ACTR2, GSTT1, PRDX2, UROD, SNRPD1, GBE1, HAAO, GLRX, SPTBN1, APOB, ANXA2, RPS10, FMNL3, EIF4B, SEC23A, PLA2G4C, MAT2A, SDPR, ACY3, ACLY, EIF4G1
GO:0031982	vesicle	59	2.43E-16	5.5E-14	3.85E-13	CES2, MPI, TF, NDRG1, EPS8L2, HEBP2, SERPIND1, TXNL1, CTSZ, CRYM, PLAA, VTN, GAPDH, SCGN, ACTR2, GLOD4, PRDX2, KRT16, HAAO, SHBG, ALDH16A1, TTC38, FGA, H2AFX, ECI1, CTNNA1, COPA, ATP1B1, SORD, SCARB2, TARS, FLNA, BLVRB, GSTO1, GSTT2B, APOA4, MVP, C11orf54, APOC1, APOE, HBZ, CTNNB1, XPNPEP1, TUBB4B, ITIH3, NECAP1, GSTT1, CS, VAT1, GBE1, GLRX, MST1, SPTBN1, APOB, RPS10, ERP44, IDH2, ACY3, ACLY
GO:0044421	extracellular region part	56	6.07E-14	1.2E-11	9.61E-11	CES2, MPI, TF, NDRG1, EPS8L2, HEBP2, SERPIND1, TXNL1, CTSZ, CRYM, PLAA, HSP90AB1, GAPDH, ACTR2, GLOD4, PRDX2, KRT16, HAAO, SHBG, ALDH16A1, TTC38, H2AFX, ECI1, COPA, ATP1B1, SORD, SCARB2, TARS, FLNA, BLVRB, GSTO1, GSTT2B, APOA4, MVP, C11orf54, APOC1, HBZ, CTNNB1, XPNPEP1, TUBB4B, ITIH3, GSTT1, CS, VAT1, GBE1, GLRX, MST1, TNN, SPTBN1, APOB, RAB35, RPS10, ERP44, IDH2, ACY3, ACLY
GO:0005576	extracellular region	57	4.02E-11	7.07E-9	6.36E-8	CES2, MPI, NDRG1, EPS8L2, HEBP2, LYG2, SERPIND1, TXNL1, CTSZ, CRYM, PLAA, HSP90AB1, GAPDH, SCGN, ACTR2, GLOD4, PRDX2, KRT16, HAAO, SHBG, ALDH16A1, TTC38, H2AFX, ECI1, COPA, ATP1B1, SORD, SCARB2, TARS, FLNA, BLVRB, GSTO1, GSTT2B, APOA4, MVP, C11orf54, HBZ, CTNNB1, XPNPEP1, DHRS11, TUBB4B, ITIH3, GSTT1, CS, VAT1, GBE1, GLRX, MST1, TNN, SPTBN1, APOB, RAB35, RPS10, ERP44, IDH2, ACY3, ACLY
GO:0042627	chylomicron	4	6.33E-7	0.0001	0.001	APOC1, APOB, APOA4, APOE
GO:0030120	vesicle coat	5	3.83E-6	5.52E-4	6.07E-3	TF, NECAP1, COPA, COPB1, SEC23A
GO:0034361	very-low-density lipoprotein particle	4	4.8E-6	5.84E-4	7.6E-3	APOC1, APOB, APOA4, APOE
GO:0044444	cytoplasmic part	58	4.19E-5	4.74E-3	6.64E-2	USP9X, CES2, GYS1, MPI, TF, PSMB11, HEBP2, PSMC4, OXCT1, TRIB3, CRYM, MEFV, LRRC59, DAO, HSP90AB1, GAPDH, GCN1L1, SCGN, ACTR2, GLOD4, PRDX2, SNRPD1, ADPRHL2, MAT2A, SDPR, EIF4A3, COPA, PFDN4, TARS, LRRC8C, PAPSS1, BLVRB, GSTO1, EIF5B, DPYSL5, GSTT2B, TDO2, RPIA, APOA4, MVP, APOC1, TPH1, XPNPEP1, TUBB4B, NECAP1, GSTT1, CS, UROD, VAT1, ACADS, GBE1, APOB, RPS10, ERP44, FMNL3, EIF4B, ACY3, EIF4G1
GO:0034363	intermediate-density lipoprotein particle	2	2.2E-4	2.33E-2	3.49E-1	APOB, APOE
GO:0048475	coated membrane	4	4.97E-4	4.63E-2	7.88E-1	COPA, TF, NECAP1, SEC23A
GO:0030117	membrane coat	4	4.97E-4	4.63E-2	7.88E-1	COPA, TF, NECAP1, SEC23A
GO:0031967	organelle envelope	15	5.62E-4	4.76E-2	8.91E-1	APOE, PI4KB, SORD, VAT1, ACADS, HAAO, HK2, IDH2, PLA2G4C, MVP, TRIB3, ECI1, LRRC59, DAO, GAPDH
GO:0030662	coated vesicle membrane	5	6.01E-4	4.76E-2	9.52E-1	APOB, TF, NECAP1, COPA, COPB1
GO:0031975	envelope	15	6.01E-4	4.76E-2	9.52E-1	APOE, PI4KB, SORD, VAT1, ACADS, HAAO, HK2, IDH2, PLA2G4C, MVP, TRIB3, ECI1, LRRC59, DAO, GAPDH
############################################################################################################################################################################################
ID	Interpro domain	NumberOfProteins	p-value	p-value_fdr	p-value_bonferroni	Proteins
IPR012336	Thioredoxin-like fold	7	2.49E-8	1.54E-4	1.54E-4	GLRX, GSTT2B, TXNL1, GSTO1, GSTT1, ERP44, PRDX2
